# Supplementary material for: The Nse5/6-like SIMC1-SLF2 complex localizes SMC5/6 to viral replication centers
Source: eLife. 2022 Nov 14;11:e79676. doi: 10.7554/eLife.79676 (PMC9708086; doi:10.7554/eLife.79676)
Supplement: Figure 4—source data 1. [file elife-79676-fig4-data1.xlsx]

## Sheet: List1
cell line:	WT			SIMC1 -/-
experiment	LT foci	SMC6 foci	%	LT foci	SMC6 foci	%
I	54	54	100	47	4	8.51064
II	77	77	100	67	8	11.9403
III	26	26	100	32	3	9.375
IV	24	23	95.8333	32	0	0
mean:			98.9583			7.45648
SD:			2.08333			5.17995
p-value:			5.3641e-08
