# Supplementary material for: The Nse5/6-like SIMC1-SLF2 complex localizes SMC5/6 to viral replication centers
Source: eLife. 2022 Nov 14;11:e79676. doi: 10.7554/eLife.79676 (PMC9708086; doi:10.7554/eLife.79676)
Supplement: Figure 4—source data 2. [file elife-79676-fig4-data2.xlsx]

## Sheet: Sheet1
cell line:	SIMC1 -/- + pSIMC1					SIMC1 -/- + pSIMC1 SIM mut
experiment	LT foci	SMC6 foci	FLAG foci	% of SMC6	% of FLAG	LT foci	SMC6 foci	Flag foci	% of SMC6	% of Flag
I	65	60	65	92.3077	100	60	30	11	50	18.3333
II	92	87	91	94.5652	98.913	117	53	9	45.2991	7.69231
III	68	62	66	91.1765	97.0588	83	50	14	60.241	16.8675
mean:				92.6831	98.6573				51.8467	14.2977
SD:				1.72529	1.48717				7.64017	5.7672
p-value:				0.00083298	1.63815e-05
