# Supplementary material for: The Nse5/6-like SIMC1-SLF2 complex localizes SMC5/6 to viral replication centers
Source: eLife. 2022 Nov 14;11:e79676. doi: 10.7554/eLife.79676 (PMC9708086; doi:10.7554/eLife.79676)
Supplement: Figure 6—source data 2. [file elife-79676-fig6-data2.xlsx]

## Sheet: Sheet1
cell line:	SIMC1 -/- + pSIMC1					SIMC1 -/- + pSIMC1 combo mut
experiment	LT foci	SMC6 foci	FLAG foci	% of SMC6	% of FLAG	LT foci	SMC6 foci	Flag foci	% of SMC6	% of Flag
I	63	59	62	93.6508	98.4127	56	8	56	14.2857	100
II	83	82	83	98.7952	100	85	19	79	22.3529	92.9412
III	74	67	67	90.5405	90.5405	69	22	69	31.8841	100
mean:				94.3288	96.3177				22.8409	97.6471
SD:				4.16888	5.06576				8.80931	4.07541
p-value:				0.000221079	0.741118
