# Supplementary material for: The Nse5/6-like SIMC1-SLF2 complex localizes SMC5/6 to viral replication centers
Source: eLife. 2022 Nov 14;11:e79676. doi: 10.7554/eLife.79676 (PMC9708086; doi:10.7554/eLife.79676)
Supplement: Figure 8—figure supplement 1—source data 1. [file elife-79676-fig8-figsupp1-data1.xlsx]

## Sheet: List1
target	vector	timepoint (h)	Cq	Cq Mean	Cq Std. Dev	Expression 2^-(∆∆Ct)	Expression SEM
SIMC1	none		23.0967	23.1183	0.0391258	1	0.0352526
SIMC1	none		23.0947	23.1183	0.0391258						SIMC1										SLF1
SIMC1	none		23.1635	23.1183	0.0391258					plasmid	none	SV40				control					none	SV40				control
SIMC1	SV40	24	23.4847	23.4436	0.0358206	0.720222	0.0207941			timepoint		24h	48h	72h	96h	24h	48h	72h	96h			24h	48h	72h	96h	24h	48h	72h	96h
SIMC1	SV40	24	23.4193	23.4436	0.0358206					2^-(∆∆Ct)	1	0.720222	0.999312	1.35941	1.24471	0.898059	1.01903	1.1055	1.25787		1	0.830561	1.42153	1.98144	1.48094	0.86586	0.972125	1.09251	1.3309
SIMC1	SV40	24	23.4266	23.4436	0.0358206
SIMC1	SV40	48	23.2202	23.2377	0.0257583	0.999312	0.0236778
SIMC1	SV40	48	23.2256	23.2377	0.0257583						SIMC1										SLF1
SIMC1	SV40	48	23.2673	23.2377	0.0257583					plasmid	none	SV40				control					none	SV40				control
SIMC1	SV40	72	23.4717	23.4657	0.125457	1.35941	0.0686239			timepoint		SV40-24h	48h	72h	96h	24h	48h	72h	96h			24h	48h	72h	96h	24h	48h	72h	96h
SIMC1	SV40	72	23.588	23.4657	0.125457					SEM	0.0352526	0.0207941	0.0236778	0.0686239	0.0319458	0.0345164	0.0173996	0.0410407	0.087813		0.031725	0.0303093	0.0388114	0.0375075	0.0634305	0.0279359	0.0338283	0.0542222	0.08401
SIMC1	SV40	72	23.3373	23.4657	0.125457
SIMC1	SV40	96	23.1952	23.1823	0.0430224	1.24471	0.0319458
SIMC1	SV40	96	23.1343	23.1823	0.0430224
SIMC1	SV40	96	23.2174	23.1823	0.0430224
SIMC1	control	24	23.4319	23.3702	0.0537678	0.898059	0.0345164
SIMC1	control	24	23.3457	23.3702	0.0537678
SIMC1	control	24	23.3331	23.3702	0.0537678
SIMC1	control	48	23.22	23.2008	0.0305626	1.01903	0.0173996
SIMC1	control	48	23.2169	23.2008	0.0305626
SIMC1	control	48	23.1656	23.2008	0.0305626
SIMC1	control	72	23.4101	23.3748	0.0322145	1.1055	0.0410407
SIMC1	control	72	23.3673	23.3748	0.0322145
SIMC1	control	72	23.347	23.3748	0.0322145
SIMC1	control	96	23.0827	23.1696	0.0753248	1.25787	0.087813
SIMC1	control	96	23.2095	23.1696	0.0753248
SIMC1	control	96	23.2166	23.1696	0.0753248
SLF1	none		24.1793	24.1753	0.00745119	1	0.031725
SLF1	none		24.1799	24.1753	0.00745119
SLF1	none		24.1667	24.1753	0.00745119
SLF1	SV40	24	24.3047	24.2949	0.0662832	0.830561	0.0303093
SLF1	SV40	24	24.3558	24.2949	0.0662832
SLF1	SV40	24	24.2243	24.2949	0.0662832
SLF1	SV40	48	23.8354	23.7863	0.0425741	1.42153	0.0388114
SLF1	SV40	48	23.7617	23.7863	0.0425741
SLF1	SV40	48	23.7617	23.7863	0.0425741
SLF1	SV40	72	24.0152	23.9791	0.0454428	1.98144	0.0375075
SLF1	SV40	72	23.9281	23.9791	0.0454428
SLF1	SV40	72	23.994	23.9791	0.0454428
SLF1	SV40	96	23.8934	23.9886	0.0958791	1.48094	0.0634305
SLF1	SV40	96	23.9873	23.9886	0.0958791
SLF1	SV40	96	24.0851	23.9886	0.0958791
SLF1	control	24	24.4654	24.4799	0.0129216	0.86586	0.0279359
SLF1	control	24	24.4901	24.4799	0.0129216
SLF1	control	24	24.4842	24.4799	0.0129216
SLF1	control	48	24.2734	24.3258	0.0816991	0.972125	0.0338283
SLF1	control	48	24.42	24.3258	0.0816991
SLF1	control	48	24.2841	24.3258	0.0816991
SLF1	control	72	24.5502	24.4489	0.0883899	1.09251	0.0542222
SLF1	control	72	24.3875	24.4489	0.0883899
SLF1	control	72	24.409	24.4489	0.0883899
SLF1	control	96	24.1348	24.1452	0.0110551	1.3309	0.08401
SLF1	control	96	24.1568	24.1452	0.0110551
SLF1	control	96	24.1438	24.1452	0.0110551
Actin	none		18.3632	18.3112	0.0789241
Actin	none		18.3501	18.3112	0.0789241
Actin	none		18.2204	18.3112	0.0789241
Actin	SV40	24	18.2236	18.163	0.0626246
Actin	SV40	24	18.0985	18.163	0.0626246
Actin	SV40	24	18.1669	18.163	0.0626246
Actin	SV40	48	18.4588	18.4296	0.0533105
Actin	SV40	48	18.3681	18.4296	0.0533105
Actin	SV40	48	18.462	18.4296	0.0533105
Actin	SV40	72	19.0994	19.1016	0.0131285
Actin	SV40	72	19.0897	19.1016	0.0131285
Actin	SV40	72	19.1157	19.1016	0.0131285
Actin	SV40	96	18.7396	18.691	0.0475615
Actin	SV40	96	18.6446	18.691	0.0475615
Actin	SV40	96	18.6888	18.691	0.0475615
Actin	control	24	18.4883	18.408	0.0795792
Actin	control	24	18.4066	18.408	0.0795792
Actin	control	24	18.3292	18.408	0.0795792
Actin	control	48	18.4497	18.421	0.0297722
Actin	control	48	18.4229	18.421	0.0297722
Actin	control	48	18.3903	18.421	0.0297722
Actin	control	72	18.6541	18.7124	0.0869934
Actin	control	72	18.6708	18.7124	0.0869934
Actin	control	72	18.8124	18.7124	0.0869934
Actin	control	96	18.5119	18.6935	0.157344
Actin	control	96	18.779	18.6935	0.157344
Actin	control	96	18.7895	18.6935	0.157344
