# Supplementary material for: The Nse5/6-like SIMC1-SLF2 complex localizes SMC5/6 to viral replication centers
Source: eLife. 2022 Nov 14;11:e79676. doi: 10.7554/eLife.79676 (PMC9708086; doi:10.7554/eLife.79676)
Supplement: Figure 8—source data 1. [file elife-79676-fig8-data1.xlsx]

## Sheet: Sheet1
cell line:	WT + pSLF1					SIMC1 -/- + pSLF1
experiment	LT foci	FLAG foci	PML foci	% of SMC6	% of FLAG	LT foci	FLAG foci	PML foci	% of FLAG	% of PML
I	72	43	68	59.7222	94.4444	64	8	61	12.5	95.3125
II	101	55	94	54.4554	93.0693	104	19	100	18.2692	96.1538
III	94	55	80	58.5106	85.1064	115	25	108	21.7391	93.913
mean:				57.5628	90.8734				17.5028	95.1265
SD:				2.75836	5.04147				4.66701	1.13193
p-value:				0.000214773	0.227095
