# Supplementary material for: The Nse5/6-like SIMC1-SLF2 complex localizes SMC5/6 to viral replication centers
Source: eLife journal article supplement (doi:10.7554/elife.79676), 2022-11-14
Supplement: supp [file elife_poa_e79676_Figure_4_figure_supplement_1_source_data_1.xlsx]

## Sheet: wt, A11_qPCR
	experiment I
	Target	Sample	Cq	Cq Mean	Cq Std. Dev	-dCp (act-SIMC1)	2^(-dCp)	norm to wt		cell line	mean	SD
	act	wt	18.687	18.6606	0.0370352	-4.93222	0.0327532	1		WT	1	0
	act	wt	18.6183	18.6606	0.0370352					SIMC1 -/-	0.0984354	0.010272
	act	wt	18.6765	18.6606	0.0370352
	act	SIMC1 -/-	17.9961	18.0096	0.0590503	-8.19337	0.00341625	0.104303
	act	SIMC1 -/-	18.0742	18.0096	0.0590503
	act	SIMC1 -/-	17.9584	18.0096	0.0590503
	SIMC1	wt	23.6794	23.5928	0.0833496
	SIMC1	wt	23.5131	23.5928	0.0833496
	SIMC1	wt	23.5861	23.5928	0.0833496
	SIMC1	SIMC1 -/-	26.2833	26.2029	0.0700438
	SIMC1	SIMC1 -/-	26.1706	26.2029	0.0700438
	SIMC1	SIMC1 -/-	26.1549	26.2029	0.0700438
	experiment II
	act	wt	19.3139	19.2785	0.0601661	-4.6845	0.0388888	1
	act	wt	19.3127	19.2785	0.0601661
	act	wt	19.2091	19.2785	0.0601661
	act	SIMC1 -/-	18.6841	18.6071	0.0676285	-7.90405	0.00417489	0.107355
	act	SIMC1 -/-	18.5798	18.6071	0.0676285
	act	SIMC1 -/-	18.5573	18.6071	0.0676285
	SIMC1	wt	24.1057	23.963	0.136175
	SIMC1	wt	23.9491	23.963	0.136175
	SIMC1	wt	23.8344	23.963	0.136175
	SIMC1	SIMC1 -/-	26.5599	26.5111	0.0448224
	SIMC1	SIMC1 -/-	26.4718	26.5111	0.0448224
	SIMC1	SIMC1 -/-	26.5017	26.5111	0.0448224
	experiment III
	act	wt	18.4017	18.3314	0.0880225	-5.2388	0.0264828	1
	act	wt	18.3598	18.3314	0.0880225
	act	wt	18.2327	18.3314	0.0880225
	act	SIMC1 -/-	17.6429	17.6133	0.0256905	-8.59179	0.00259188	0.09787
	act	SIMC1 -/-	17.5992	17.6133	0.0256905
	act	SIMC1 -/-	17.5977	17.6133	0.0256905
	SIMC1	wt	23.6223	23.5702	0.0588131
	SIMC1	wt	23.5818	23.5702	0.0588131
	SIMC1	wt	23.5064	23.5702	0.0588131
	SIMC1	SIMC1 -/-		0	0
	SIMC1	SIMC1 -/-	26.2448	26.2051	0.056254
	SIMC1	SIMC1 -/-	26.1653	26.2051	0.056254
	experiment IV
	act	wt	17.6308	17.7458	0.106537	-5.19947	0.0272147	1
	act	wt	17.7655	17.7458	0.106537
	act	wt	17.8411	17.7458	0.106537
	act	SIMC1 -/-	17.4254	17.4254	0	-8.76926	0.00229186	0.0842141
	act	SIMC1 -/-	17.5487	17.5487	0
	act	SIMC1 -/-	17.5597	17.5597	0
	SIMC1	wt	23.0137	22.9453	0.100976
	SIMC1	wt	22.8293	22.9453	0.100976
	SIMC1	wt	22.9928	22.9453	0.100976
	SIMC1	SIMC1 -/-	26.1947	26.1947	0
	SIMC1	SIMC1 -/-	26.1957	26.1957	0
	SIMC1	SIMC1 -/-	26.2553	26.2553	0
