# Supplementary material for: The Nse5/6-like SIMC1-SLF2 complex localizes SMC5/6 to viral replication centers
Source: eLife. 2022 Nov 14;11:e79676. doi: 10.7554/eLife.79676 (PMC9708086; doi:10.7554/eLife.79676)
Supplement: Supplementary file 1. [file elife-79676-supp1.xlsx]

## Sheet: SMC5 BioID
Supplementary file 1. Mass spectrometry identification of SMC5 interacting proteins labelled by SILAC and BioID.
Gene.names	Fasta.headers	Protein.names	Mol..weight..kDa.	Sequence.length	Ratio.H.L.for	Ratio.H.L.normalized.for	Ratio.H.L.count.for	Ratio.H.L.rev	Ratio.H.L.normalized.rev	Ratio.H.L.count.rev	Sequence.coverage.for....	Sequence.coverage.rev....	Unique.peptides.for	Unique.peptides.rev	Intensity.H.for	Intensity.L.for	Intensity.H.rev	Intensity.L.rev
SMC5	>sp|Q8IY18|SMC5_HUMAN Structural maintenance of chromosomes protein 5 OS=Homo sapiens GN=SMC5 PE=1 SV=2	Structural maintenance of chromosomes protein 5	128.81	1101	15.694	15.812	67	0.0083759	0.011983	33	61.9	71.4	21	25	135500000000	11682000000	2988300000	169480000000
NDNL2	>sp|Q96MG7|MAGG1_HUMAN Melanoma-associated antigen G1 OS=Homo sapiens GN=NDNL2 PE=1 SV=1	Melanoma-associated antigen G1	34.308	304	13.12	13.236	5	0.035923	0.062613	13	39.5	45.1	10	14	663470000	70568000	48975000	936710000
NSMCE4A	>sp|Q9NXX6|NSE4A_HUMAN Non-structural maintenance of chromosomes element 4 homolog A OS=Homo sapiens GN=NSMCE4A PE=1 SV=2;>sp|Q9NXX6-2|NSE4A_HUMAN Isoform 2 of Non-structural maintenance of chromosomes element 4 homolog A OS=Homo sapiens GN=NSMCE4A;>tr|B4D	Non-structural maintenance of chromosomes element 4 homolog A	44.301	385	10.437	11.121	9	0.095674	0.14925	4	47	57.9	14	18	5657900000	968270000	209720000	4962200000
SMC6	>sp|Q96SB8|SMC6_HUMAN Structural maintenance of chromosomes protein 6 OS=Homo sapiens GN=SMC6 PE=1 SV=2;>sp|Q96SB8-2|SMC6_HUMAN Isoform 2 of Structural maintenance of chromosomes protein 6 OS=Homo sapiens GN=SMC6;>tr|C9JMN1|C9JMN1_HUMAN Structural maintena	Structural maintenance of chromosomes protein 6	126.32	1091	10.369	11.001	10	0.021897	0.035546	8	40.1	55.5	34	45	4435000000	371190000	419950000	6250200000
KPNA3	>tr|A0A024RDV7|A0A024RDV7_HUMAN Importin subunit alpha OS=Homo sapiens GN=KPNA3 PE=3 SV=1;>sp|O00505|IMA4_HUMAN Importin subunit alpha-4 OS=Homo sapiens GN=KPNA3 PE=1 SV=2;>tr|Q53F09|Q53F09_HUMAN Karyopherin alpha 3 variant (Fragment) OS=Homo sapiens PE=2	Importin subunit alpha;Importin subunit alpha-4	57.81	521	5.6219	5.7273	3	0.064778	0.10232	4	15.4	27.6	7	9	414650000	93651000	82810000	580120000
FAM208B	>sp|Q5VWN6|F208B_HUMAN Protein FAM208B OS=Homo sapiens GN=FAM208B PE=1 SV=1;>sp|Q5VWN6-2|F208B_HUMAN Isoform 2 of Protein FAM208B OS=Homo sapiens GN=FAM208B	Protein FAM208B	268.84	2430	5.5159	5.5973	31	0.054044	0.083629	23	28.9	33.6	38	42	4045700000	946030000	361950000	4815000000
NSMCE1	>tr|B2RDU2|B2RDU2_HUMAN cDNA, FLJ96768, Homo sapiens non-SMC (structural maintenance of chromosomes)element 1 protein (NSE1), mRNA OS=Homo sapiens PE=2 SV=1;>sp|Q8WV22|NSE1_HUMAN Non-structural maintenance of chromosomes element 1 homolog OS=Homo sapiens G	Non-structural maintenance of chromosomes element 1 homolog	29.724	256	5.347	4.6815	5	0.14362	0.2446	6	28.9	36.3	5	6	211220000	42051000	48213000	385930000
FAM178A	>sp|Q8IX21|F178A_HUMAN Protein FAM178A OS=Homo sapiens GN=FAM178A PE=1 SV=2;>sp|Q8IX21-2|F178A_HUMAN Isoform 2 of Protein FAM178A OS=Homo sapiens GN=FAM178A;>tr|B1AL16|B1AL16_HUMAN Protein FAM178A OS=Homo sapiens GN=FAM178A PE=1 SV=1	Protein FAM178A	131.87	1173	4.4375	4.5612	4	0.036314	0.055654	5	15.3	30.7	13	23	610250000	134100000	98842000	1365100000
SIMC1	>tr|R9TJD7|R9TJD7_HUMAN SIMC1 OS=Homo sapiens GN=SIMC1 PE=2 SV=1;>tr|F6R0L0|F6R0L0_HUMAN SUMO-interacting motif-containing protein 1 OS=Homo sapiens GN=SIMC1 PE=1 SV=1;>sp|Q8NDZ2|SIMC1_HUMAN SUMO-interacting motif-containing protein 1 OS=Homo sapiens GN=SI	SUMO-interacting motif-containing protein 1	99.096	891	4.4041	3.9916	2	0.12905	0.20493	5	2.4	11.6	2	7	18866000	2972800	34551000	211970000
BLM	>tr|B2RAN0|B2RAN0_HUMAN cDNA, FLJ95010, highly similar to Homo sapiens Bloom syndrome (BLM), mRNA OS=Homo sapiens PE=2 SV=1;>sp|P54132|BLM_HUMAN Bloom syndrome protein OS=Homo sapiens GN=BLM PE=1 SV=1;>tr|H0YNU5|H0YNU5_HUMAN Bloom syndrome protein OS=Homo	Bloom syndrome protein	158.95	1417	4.2155	3.9539	17	0.09578	0.14789	14	21.3	20.2	23	25	1941900000	554920000	240450000	1583400000
CENPC	>sp|Q03188|CENPC_HUMAN Centromere protein C OS=Homo sapiens GN=CENPC PE=1 SV=2;>tr|H0Y8J2|H0Y8J2_HUMAN Centromere protein C (Fragment) OS=Homo sapiens GN=CENPC PE=1 SV=1;>sp|Q03188-2|CENPC_HUMAN Isoform 2 of Centromere protein C OS=Homo sapiens GN=CENPC	Centromere protein C	106.83	943	3.7578	3.79	19	0.1029	0.16846	17	39.1	40.2	29	30	2512700000	623750000	362770000	2928700000
WDR3	>tr|Q5TDG3|Q5TDG3_HUMAN WD repeat domain 3, isoform CRA_b OS=Homo sapiens GN=WDR3 PE=2 SV=1;>sp|Q9UNX4|WDR3_HUMAN WD repeat-containing protein 3 OS=Homo sapiens GN=WDR3 PE=1 SV=1	WD repeat-containing protein 3	106.1	943	3.8533	3.6468	2	0.55097	0.88607	2	3.9	4.2	2	3	429680000	62255000	20308000	34893000
PARN	>tr|B3KN69|B3KN69_HUMAN cDNA FLJ13804 fis, clone THYRO1000197, highly similar to Poly(A)-specific ribonuclease PARN (EC 3.1.13.4) OS=Homo sapiens PE=2 SV=1;>sp|O95453-4|PARN_HUMAN Isoform 4 of Poly(A)-specific ribonuclease PARN OS=Homo sapiens GN=PARN;>sp|	Poly(A)-specific ribonuclease PARN	40.07	351	3.6455	3.5979	2	NA	NA	1	5.1	2.3	2	1	1090300000	762990000	3965900	6787100
FANCM	>sp|Q8IYD8|FANCM_HUMAN Fanconi anemia group M protein OS=Homo sapiens GN=FANCM PE=1 SV=2;>sp|Q8IYD8-3|FANCM_HUMAN Isoform 3 of Fanconi anemia group M protein OS=Homo sapiens GN=FANCM;>tr|H0YJ14|H0YJ14_HUMAN Fanconi anemia group M protein (Fragment) OS=Homo	Fanconi anemia group M protein	232.19	2048	3.6848	3.5523	6	0.15218	0.241	4	4.8	2.8	6	4	136420000	24839000	14849000	82170000
CENPT	>tr|H3BTR4|H3BTR4_HUMAN Centromere protein T OS=Homo sapiens GN=CENPT PE=1 SV=1;>tr|B3KPB2|B3KPB2_HUMAN cDNA FLJ31535 fis, clone NT2RI2000685 OS=Homo sapiens PE=2 SV=1;>sp|Q96BT3|CENPT_HUMAN Centromere protein T OS=Homo sapiens GN=CENPT PE=1 SV=2;>tr|H3BUW	Centromere protein T	55.134	506	2.6789	2.718	2	0.14326	0.23525	3	5.7	10.9	3	4	45789000	17823000	113530000	128450000
UTP3	>sp|Q9NQZ2|SAS10_HUMAN Something about silencing protein 10 OS=Homo sapiens GN=UTP3 PE=1 SV=1	Something about silencing protein 10	54.557	479	2.6493	2.455	2	0.54733	0.8674	5	4.4	14	2	5	128450000	47882000	99478000	144550000
RAD18	>tr|A0A024R2I7|A0A024R2I7_HUMAN RAD18 homolog (S. cerevisiae), isoform CRA_a OS=Homo sapiens GN=RAD18 PE=4 SV=1;>sp|Q9NS91|RAD18_HUMAN E3 ubiquitin-protein ligase RAD18 OS=Homo sapiens GN=RAD18 PE=1 SV=2;>tr|F8WE49|F8WE49_HUMAN E3 ubiquitin-protein ligase	E3 ubiquitin-protein ligase RAD18	56.194	495	2.6505	2.3888	3	0.20398	0.32974	5	6.3	13.3	3	5	83656000	37119000	54121000	194960000
BRCA1	>tr|Q3LRH8|Q3LRH8_HUMAN Breast cancer 1 early onset (Fragment) OS=Homo sapiens GN=BRCA1 PE=4 SV=1;>tr|Q5XLT4|Q5XLT4_HUMAN Breast and ovarian cancer susceptibility protein (Fragment) OS=Homo sapiens GN=BRCA1 PE=2 SV=1;>tr|G8I0D8|G8I0D8_HUMAN Breast and ovar	Breast cancer type 1 susceptibility protein	203.02	1822	2.4143	2.3433	16	0.19561	0.29424	9	13.6	16.2	22	23	900480000	371760000	204840000	1040900000
RANBP2	>sp|P49792|RBP2_HUMAN E3 SUMO-protein ligase RanBP2 OS=Homo sapiens GN=RANBP2 PE=1 SV=2	E3 SUMO-protein ligase RanBP2	358.2	3224	2.4757	2.3284	61	0.46739	0.73744	58	31.1	24.1	51	42	4930800000	2287100000	1453100000	3027900000
SUMO1	>tr|A0A024R3Z2|A0A024R3Z2_HUMAN SMT3 suppressor of mif two 3 homolog 1 (Yeast), isoform CRA_a OS=Homo sapiens GN=SUMO1 PE=4 SV=1;>tr|B8ZZN6|B8ZZN6_HUMAN Small ubiquitin-related modifier 1 OS=Homo sapiens GN=SUMO1 PE=1 SV=1;>sp|P63165|SUMO1_HUMAN Small ubiq	Small ubiquitin-related modifier 1	11.557	101	2.2774	2.26	7	0.28654	0.44953	4	59.4	51.5	6	5	984090000	407140000	182830000	600710000
MKI67	>sp|P46013|KI67_HUMAN Antigen KI-67 OS=Homo sapiens GN=MKI67 PE=1 SV=2;>tr|A0A087WV66|A0A087WV66_HUMAN Antigen KI-67 OS=Homo sapiens GN=MKI67 PE=1 SV=1	Antigen KI-67	358.69	3256	2.1321	2.2419	281	0.28455	0.43839	266	64.9	66.9	18	20	93362000000	39942000000	28882000000	87902000000
LAS1L	>sp|Q9Y4W2-2|LAS1L_HUMAN Isoform 2 of Ribosomal biogenesis protein LAS1L OS=Homo sapiens GN=LAS1L;>sp|Q9Y4W2|LAS1L_HUMAN Ribosomal biogenesis protein LAS1L OS=Homo sapiens GN=LAS1L PE=1 SV=2;>sp|Q9Y4W2-3|LAS1L_HUMAN Isoform 3 of Ribosomal biogenesis protei	Ribosomal biogenesis protein LAS1L	81.242	717	2.1863	2.2305	10	0.35332	0.55795	8	18	14.8	10	9	496160000	240490000	124230000	314830000
AATF	>sp|Q9NY61|AATF_HUMAN Protein AATF OS=Homo sapiens GN=AATF PE=1 SV=1	Protein AATF	63.132	560	2.0568	2.0917	5	0.24388	0.399	5	14.8	17.9	7	8	156070000	82477000	130520000	265790000
ARID3B	>tr|B4DQB0|B4DQB0_HUMAN cDNA FLJ61335, highly similar to Homo sapiens AT rich interactive domain 3B (BRIGHT- like) (ARID3B), mRNA OS=Homo sapiens PE=2 SV=1;>sp|Q8IVW6-4|ARI3B_HUMAN Isoform 4 of AT-rich interactive domain-containing protein 3B OS=Homo sapie	AT-rich interactive domain-containing protein 3B	51.584	470	1.9292	2.0501	19	0.2738	0.43041	17	50.6	40.4	21	17	2138100000	1108100000	492660000	1697200000
ZNF198;ZMYM2	>tr|A0A024RDS3|A0A024RDS3_HUMAN Zinc finger protein 198, isoform CRA_b OS=Homo sapiens GN=ZNF198 PE=4 SV=1;>sp|Q9UBW7|ZMYM2_HUMAN Zinc finger MYM-type protein 2 OS=Homo sapiens GN=ZMYM2 PE=1 SV=1;>tr|A8K126|A8K126_HUMAN cDNA FLJ76647, highly similar to Hom	Zinc finger MYM-type protein 2	154.91	1377	2.2612	2.0294	7	0.37471	0.62638	10	10.1	13.2	11	15	261360000	134680000	152840000	368530000
PCCA	>sp|P05165|PCCA_HUMAN Propionyl-CoA carboxylase alpha chain, mitochondrial OS=Homo sapiens GN=PCCA PE=1 SV=4;>tr|B2RDE0|B2RDE0_HUMAN cDNA, FLJ96567, highly similar to Homo sapiens propionyl Coenzyme A carboxylase, alpha polypeptide(PCCA), mRNA OS=Homo sapi	Propionyl-CoA carboxylase alpha chain, mitochondrial	80.058	728	1.9215	2.0261	58	0.24091	0.35587	56	62.2	68	40	43	12730000000	6377900000	4430100000	16876000000
NOL6	>tr|A0A0A0MRW6|A0A0A0MRW6_HUMAN Nucleolar protein 6 OS=Homo sapiens GN=NOL6 PE=4 SV=1;>tr|B4DF80|B4DF80_HUMAN cDNA FLJ58527, highly similar to Nucleolar protein 6 OS=Homo sapiens PE=2 SV=1;>sp|Q9H6R4-2|NOL6_HUMAN Isoform 2 of Nucleolar protein 6 OS=Homo sa	Nucleolar protein 6	112.16	1008	2.2322	2.0168	2	NA	NA	0	1.9	0	2	0	17699000	9018000	0	0
ZDBF2	>tr|N0DVX5|N0DVX5_HUMAN DBF4-type zinc finger-containing protein 2 OS=Homo sapiens GN=ZDBF2 PE=1 SV=1;>tr|N0DVB2|N0DVB2_HUMAN Zinc finger DBF-type containing 2 vesion 1 OS=Homo sapiens GN=ZDBF2 PE=2 SV=1;>sp|Q9HCK1|ZDBF2_HUMAN DBF4-type zinc finger-contain	DBF4-type zinc finger-containing protein 2	265.05	2352	1.9645	1.9997	3	0.18624	0.28834	4	3.6	6.5	6	10	196100000	128150000	57348000	326560000
UBN1	>sp|Q9NPG3-2|UBN1_HUMAN Isoform 2 of Ubinuclein-1 OS=Homo sapiens GN=UBN1;>sp|Q9NPG3|UBN1_HUMAN Ubinuclein-1 OS=Homo sapiens GN=UBN1 PE=1 SV=2;>tr|K7EQR1|K7EQR1_HUMAN Ubinuclein-1 (Fragment) OS=Homo sapiens GN=UBN1 PE=4 SV=1	Ubinuclein-1	118.55	1104	1.9272	1.9484	2	0.55625	0.87218	2	1.8	1.8	2	2	12198000	6232700	6289600	10455000
THRAP3	>sp|Q9Y2W1|TR150_HUMAN Thyroid hormone receptor-associated protein 3 OS=Homo sapiens GN=THRAP3 PE=1 SV=2	Thyroid hormone receptor-associated protein 3	108.66	955	1.8549	1.9253	57	0.36764	0.59212	40	35.9	27.9	30	23	8837200000	4570500000	2352500000	5865000000
BCLAF1	>sp|Q9NYF8-2|BCLF1_HUMAN Isoform 2 of Bcl-2-associated transcription factor 1 OS=Homo sapiens GN=BCLAF1;>sp|Q9NYF8|BCLF1_HUMAN Bcl-2-associated transcription factor 1 OS=Homo sapiens GN=BCLAF1 PE=1 SV=2;>tr|E9PK09|E9PK09_HUMAN Bcl-2-associated transcriptio	Bcl-2-associated transcription factor 1	105.95	918	1.7313	1.9035	27	0.37144	0.6057	19	20.5	17.6	1	1	3939600000	1923600000	1000500000	2474100000
NOL8;DKFZp686P12242	>tr|A0A024R250|A0A024R250_HUMAN Nucleolar protein 8, isoform CRA_a OS=Homo sapiens GN=NOL8 PE=4 SV=1;>sp|Q76FK4-4|NOL8_HUMAN Isoform 4 of Nucleolar protein 8 OS=Homo sapiens GN=NOL8;>sp|Q76FK4|NOL8_HUMAN Nucleolar protein 8 OS=Homo sapiens GN=NOL8 PE=1 SV=	Nucleolar protein 8	132.32	1173	1.8816	1.8924	42	0.41857	0.6675	32	37.5	33.7	39	35	2395100000	1294300000	862190000	1970300000
ZBTB9	>tr|B2R8Z7|B2R8Z7_HUMAN cDNA, FLJ94135, highly similar to Homo sapiens zinc finger and BTB domain containing 9 (ZBTB9), mRNA OS=Homo sapiens PE=2 SV=1;>sp|Q96C00|ZBTB9_HUMAN Zinc finger and BTB domain-containing protein 9 OS=Homo sapiens GN=ZBTB9 PE=1 SV=1	Zinc finger and BTB domain-containing protein 9	50.586	473	1.9241	1.8919	11	0.299	0.48293	10	22.8	25.4	11	10	508470000	258980000	244830000	700030000
TOPBP1	>tr|A7E2X7|A7E2X7_HUMAN Topoisomerase (DNA) II binding protein 1 OS=Homo sapiens GN=TOPBP1 PE=2 SV=1;>tr|A0AV47|A0AV47_HUMAN Topoisomerase (DNA) II binding protein 1 OS=Homo sapiens GN=TOPBP1 PE=2 SV=2;>sp|Q92547|TOPB1_HUMAN DNA topoisomerase 2-binding pro	DNA topoisomerase 2-binding protein 1	160.55	1435	1.9366	1.8918	4	0.28871	0.47007	6	3.6	6.1	5	8	47001000	20954000	32718000	97795000
MPHOSPH10	>sp|O00566|MPP10_HUMAN U3 small nucleolar ribonucleoprotein protein MPP10 OS=Homo sapiens GN=MPHOSPH10 PE=1 SV=2;>tr|B3KPV5|B3KPV5_HUMAN cDNA FLJ32300 fis, clone PROST2002227, highly similar to U3 small nucleolar ribonucleoprotein protein MPP10 (Fragment)	U3 small nucleolar ribonucleoprotein protein MPP10	78.863	681	2.048	1.8866	7	0.3534	0.65097	9	15.3	19.1	8	11	331050000	171750000	176460000	435120000
FTSJ3	>tr|B4DKU3|B4DKU3_HUMAN cDNA FLJ53449, highly similar to rRNA methyltransferase 3 (EC 2.1.1.-) OS=Homo sapiens PE=2 SV=1;>sp|Q8IY81|SPB1_HUMAN pre-rRNA processing protein FTSJ3 OS=Homo sapiens GN=FTSJ3 PE=1 SV=2	pre-rRNA processing protein FTSJ3	82.578	726	2.1121	1.8862	7	0.31841	0.51907	4	14.9	14.2	7	8	762120000	336160000	98079000	313130000
HIVEP1	>tr|F5H212|F5H212_HUMAN Zinc finger protein 40 OS=Homo sapiens GN=HIVEP1 PE=1 SV=2;>sp|P15822|ZEP1_HUMAN Zinc finger protein 40 OS=Homo sapiens GN=HIVEP1 PE=1 SV=3	Zinc finger protein 40	296.67	2717	2.0775	1.882	4	0.64142	0.97262	5	1.6	2.4	4	5	100410000	41962000	84085000	102440000
MKI67	>sp|P46013-2|KI67_HUMAN Isoform Short of Antigen KI-67 OS=Homo sapiens GN=MKI67	Antigen KI-67	319.44	2896	1.7104	1.8716	3	NA	NA	1	66.1	66.7	2	1	315330000	179160000	16975000	68598000
TOP2A	>sp|P11388|TOP2A_HUMAN DNA topoisomerase 2-alpha OS=Homo sapiens GN=TOP2A PE=1 SV=3;>sp|P11388-2|TOP2A_HUMAN Isoform 2 of DNA topoisomerase 2-alpha OS=Homo sapiens GN=TOP2A;>sp|P11388-3|TOP2A_HUMAN Isoform 3 of DNA topoisomerase 2-alpha OS=Homo sapiens GN=	DNA topoisomerase 2-alpha	174.38	1531	1.8244	1.8701	59	0.29256	0.46739	55	40.2	39.6	42	43	7130700000	3883300000	2411200000	7734000000
BUD13	>tr|A8K4Z6|A8K4Z6_HUMAN cDNA FLJ76180 OS=Homo sapiens PE=2 SV=1;>sp|Q9BRD0|BUD13_HUMAN BUD13 homolog OS=Homo sapiens GN=BUD13 PE=1 SV=1;>sp|Q9BRD0-2|BUD13_HUMAN Isoform 2 of BUD13 homolog OS=Homo sapiens GN=BUD13	BUD13 homolog	70.52	619	1.8219	1.8586	5	0.58414	0.93483	3	6.9	11.3	4	6	157990000	93078000	108710000	142840000
RAP80;UIMC1	>tr|A0A024R7R0|A0A024R7R0_HUMAN Receptor associated protein 80, isoform CRA_c OS=Homo sapiens GN=RAP80 PE=4 SV=1;>sp|Q96RL1|UIMC1_HUMAN BRCA1-A complex subunit RAP80 OS=Homo sapiens GN=UIMC1 PE=1 SV=2;>sp|Q96RL1-3|UIMC1_HUMAN Isoform 3 of BRCA1-A complex s	BRCA1-A complex subunit RAP80	79.727	719	1.7932	1.848	9	0.33337	0.548	4	18.2	11.1	10	6	331800000	153960000	71624000	217120000
MFAP1	>sp|P55081|MFAP1_HUMAN Microfibrillar-associated protein 1 OS=Homo sapiens GN=MFAP1 PE=1 SV=2	Microfibrillar-associated protein 1	51.958	439	1.8116	1.8403	7	0.34723	0.61047	5	13.2	13.9	5	4	398390000	244500000	151350000	394830000
RRS1	>sp|Q15050|RRS1_HUMAN Ribosome biogenesis regulatory protein homolog OS=Homo sapiens GN=RRS1 PE=1 SV=2	Ribosome biogenesis regulatory protein homolog	41.193	365	1.7663	1.8375	10	0.34988	0.55377	7	34.8	31	11	10	1925400000	991340000	267200000	613000000
C11orf49	>sp|Q9H6J7|CK049_HUMAN UPF0705 protein C11orf49 OS=Homo sapiens GN=C11orf49 PE=2 SV=2;>tr|B4DUV7|B4DUV7_HUMAN cDNA FLJ52767 OS=Homo sapiens PE=2 SV=1;>tr|B4DEG1|B4DEG1_HUMAN cDNA FLJ52476 OS=Homo sapiens PE=2 SV=1	UPF0705 protein C11orf49	37.353	331	1.7855	1.8151	9	0.77837	1.1877	6	42.3	32.3	1	0	1062800000	595750000	284240000	383560000
DDX10	>sp|Q13206|DDX10_HUMAN Probable ATP-dependent RNA helicase DDX10 OS=Homo sapiens GN=DDX10 PE=1 SV=2;>tr|E9PIF2|E9PIF2_HUMAN Probable ATP-dependent RNA helicase DDX10 OS=Homo sapiens GN=DDX10 PE=1 SV=1;>tr|Q59EC7|Q59EC7_HUMAN DEAD (Asp-Glu-Ala-Asp) box poly	Probable ATP-dependent RNA helicase DDX10	100.89	875	1.8034	1.8042	26	0.41247	0.66282	17	31.8	30.4	25	23	1963500000	1076400000	729490000	1206300000
ADNP	>tr|Q6DHZ8|Q6DHZ8_HUMAN Activity-dependent neuroprotector homeobox OS=Homo sapiens GN=ADNP PE=2 SV=1;>tr|B2RBM8|B2RBM8_HUMAN cDNA, FLJ95596, highly similar to Homo sapiens activity-dependent neuroprotector (ADNP), mRNA OS=Homo sapiens PE=2 SV=1;>sp|Q9H2P0|	Activity-dependent neuroprotector homeobox protein	123.45	1102	1.8362	1.8023	32	0.29565	0.47898	29	35.2	36.9	33	34	2692400000	1381300000	734220000	2079500000
ESF1	>sp|Q9H501|ESF1_HUMAN ESF1 homolog OS=Homo sapiens GN=ESF1 PE=1 SV=1;>tr|Q05C10|Q05C10_HUMAN ESF1 protein (Fragment) OS=Homo sapiens GN=ESF1 PE=2 SV=1;>tr|A0JLU5|A0JLU5_HUMAN ESF1 protein (Fragment) OS=Homo sapiens GN=ESF1 PE=2 SV=1	ESF1 homolog	98.795	851	1.825	1.7978	17	0.35609	0.54507	21	22.9	29.4	20	23	1265400000	654820000	505810000	1342200000
NUP214;DKFZp686J0330	>tr|A0A024R8B6|A0A024R8B6_HUMAN Nucleoporin 214kDa, isoform CRA_b OS=Homo sapiens GN=NUP214 PE=4 SV=1;>sp|P35658-2|NU214_HUMAN Isoform 2 of Nuclear pore complex protein Nup214 OS=Homo sapiens GN=NUP214;>sp|P35658-4|NU214_HUMAN Isoform 4 of Nuclear pore com	Nuclear pore complex protein Nup214	218.17	2131	1.8306	1.7977	20	0.48234	0.76702	13	12.8	10.5	19	16	728930000	384450000	694300000	447850000
GNL2	>tr|Q5T0F3|Q5T0F3_HUMAN Guanine nucleotide binding protein-like 2 (Nucleolar) OS=Homo sapiens GN=GNL2 PE=2 SV=1;>sp|Q13823|NOG2_HUMAN Nucleolar GTP-binding protein 2 OS=Homo sapiens GN=GNL2 PE=1 SV=1	Nucleolar GTP-binding protein 2	83.654	731	1.6163	1.7976	38	0.38036	0.64102	18	43.5	26.5	31	16	3715100000	2224500000	1021900000	1107900000
SUMO2	>tr|A0A024R8S3|A0A024R8S3_HUMAN Small ubiquitin-related modifier OS=Homo sapiens GN=SUMO2 PE=3 SV=1;>sp|P61956-2|SUMO2_HUMAN Isoform 2 of Small ubiquitin-related modifier 2 OS=Homo sapiens GN=SUMO2;>sp|P61956|SUMO2_HUMAN Small ubiquitin-related modifier 2	Small ubiquitin-related modifier 2	10.871	95	1.7136	1.7919	5	0.45177	0.65483	5	27.4	27.4	2	2	4195900000	2056300000	1562000000	3006500000
RDBP;NELF-E;NELFE	>tr|B7Z6T4|B7Z6T4_HUMAN RD RNA binding protein, isoform CRA_a OS=Homo sapiens GN=RDBP PE=2 SV=1;>tr|H9ZYJ1|H9ZYJ1_HUMAN Negative elongation factor E OS=Homo sapiens GN=NELF-E PE=2 SV=1;>sp|P18615|NELFE_HUMAN Negative elongation factor E OS=Homo sapiens GN=	Negative elongation factor E	38.398	336	1.7282	1.7781	2	0.48419	0.75402	3	7.4	16.7	2	4	60180000	34849000	57427000	115920000
GTF2I	>tr|X5D2J9|X5D2J9_HUMAN General transcription factor IIi isoform D (Fragment) OS=Homo sapiens GN=GTF2I PE=2 SV=1;>tr|Q499G6|Q499G6_HUMAN General transcription factor II, i OS=Homo sapiens GN=GTF2I PE=2 SV=1;>tr|X5D939|X5D939_HUMAN General transcription fac	General transcription factor II-I	107.97	957	1.8076	1.7646	22	0.40878	0.64929	15	29.5	20.3	25	18	1411500000	901880000	346490000	927190000
DNTTIP2	>sp|Q5QJE6|TDIF2_HUMAN Deoxynucleotidyltransferase terminal-interacting protein 2 OS=Homo sapiens GN=DNTTIP2 PE=1 SV=2;>tr|J3KP30|J3KP30_HUMAN Deoxynucleotidyltransferase terminal-interacting protein 2 OS=Homo sapiens GN=DNTTIP2 PE=1 SV=1;>tr|B7Z854|B7Z854	Deoxynucleotidyltransferase terminal-interacting protein 2	84.468	756	1.8238	1.761	26	0.36465	0.55242	18	38.5	37.3	23	21	2925500000	1636200000	1135900000	2837200000
DDX50;mcdrh;DKFZp761E0323	>tr|B4DED6|B4DED6_HUMAN cDNA FLJ56545, highly similar to ATP-dependent RNA helicase DDX50 (EC 3.6.1.-) OS=Homo sapiens PE=2 SV=1;>tr|A0A087WVB0|A0A087WVB0_HUMAN ATP-dependent RNA helicase DDX50 OS=Homo sapiens GN=DDX50 PE=1 SV=1;>sp|Q9BQ39|DDX50_HUMAN ATP-	ATP-dependent RNA helicase DDX50	72.157	643	1.7653	1.7478	10	0.40563	0.63775	9	25.7	19.9	12	9	504700000	284930000	129350000	300220000
NAT10	>sp|Q9H0A0|NAT10_HUMAN N-acetyltransferase 10 OS=Homo sapiens GN=NAT10 PE=1 SV=2;>sp|Q9H0A0-2|NAT10_HUMAN Isoform 2 of N-acetyltransferase 10 OS=Homo sapiens GN=NAT10;>tr|A0A087WV29|A0A087WV29_HUMAN N-acetyltransferase 10 OS=Homo sapiens GN=NAT10 PE=1 SV=1	N-acetyltransferase 10	115.73	1025	1.6435	1.7444	17	0.38121	0.61817	8	30.4	19.8	14	7	1181200000	712800000	229350000	585170000
FAM207A	>sp|Q9NSI2-2|F207A_HUMAN Isoform B of Protein FAM207A OS=Homo sapiens GN=FAM207A;>sp|Q9NSI2|F207A_HUMAN Protein FAM207A OS=Homo sapiens GN=FAM207A PE=1 SV=2;>tr|C9JJU7|C9JJU7_HUMAN Protein FAM207A (Fragment) OS=Homo sapiens GN=FAM207A PE=1 SV=1	Protein FAM207A	23.944	215	1.7113	1.7297	5	0.28167	0.4894	4	25.6	20.5	5	4	224900000	130060000	54578000	147150000
UTP14A	>sp|Q9BVJ6|UT14A_HUMAN U3 small nucleolar RNA-associated protein 14 homolog A OS=Homo sapiens GN=UTP14A PE=1 SV=1;>sp|Q9BVJ6-3|UT14A_HUMAN Isoform 3 of U3 small nucleolar RNA-associated protein 14 homolog A OS=Homo sapiens GN=UTP14A;>tr|B4E343|B4E343_HUMAN	U3 small nucleolar RNA-associated protein 14 homolog A	87.977	771	1.7394	1.7288	27	0.37111	0.56639	21	40.2	26.2	28	20	1702100000	951360000	562080000	1330600000
TFIP11	>tr|Q8N523|Q8N523_HUMAN Tuftelin-interacting protein 11 OS=Homo sapiens GN=TFIP11 PE=2 SV=1;>tr|A0A024R1I7|A0A024R1I7_HUMAN Tuftelin-interacting protein 11 OS=Homo sapiens GN=TFIP11 PE=3 SV=1;>sp|Q9UBB9|TFP11_HUMAN Tuftelin-interacting protein 11 OS=Homo s	Tuftelin-interacting protein 11	96.793	837	1.7264	1.7186	27	0.50385	0.79908	20	44.8	32.1	29	22	1452800000	844800000	599810000	1054400000
TCEB3	>tr|A0A024RAC6|A0A024RAC6_HUMAN Transcription elongation factor B (SIII), polypeptide 3 (110kDa, elongin A), isoform CRA_a OS=Homo sapiens GN=TCEB3 PE=4 SV=1;>sp|Q14241|ELOA1_HUMAN Transcription elongation factor B polypeptide 3 OS=Homo sapiens GN=TCEB3 PE	Transcription elongation factor B polypeptide 3	87.229	772	1.6374	1.715	21	0.36071	0.57852	21	31.2	23.2	20	17	1433700000	1952100000	639620000	1467700000
BCOR;BCOR-RARA	>tr|H9A532|H9A532_HUMAN BCL6 corepressor-cyclin B3 fusion protein OS=Homo sapiens PE=2 SV=1;>sp|Q6W2J9-4|BCOR_HUMAN Isoform 4 of BCL-6 corepressor OS=Homo sapiens GN=BCOR;>sp|Q6W2J9-2|BCOR_HUMAN Isoform 2 of BCL-6 corepressor OS=Homo sapiens GN=BCOR;>sp|Q6	BCL-6 corepressor	337.72	3038	1.711	1.7003	13	0.34974	0.55596	13	7.5	8.9	17	19	608030000	349900000	194600000	627190000
BYSL	>sp|Q13895|BYST_HUMAN Bystin OS=Homo sapiens GN=BYSL PE=1 SV=3	Bystin	49.601	437	1.6735	1.6957	3	NA	NA	0	4.8	0	2	0	32227000	18081000	0	0
NPM1	>sp|P06748|NPM_HUMAN Nucleophosmin OS=Homo sapiens GN=NPM1 PE=1 SV=2;>tr|A4ZU86|A4ZU86_HUMAN Truncated nucleolar phosphoprotein B23 OS=Homo sapiens GN=NPM1 PE=2 SV=1;>sp|P06748-2|NPM_HUMAN Isoform 2 of Nucleophosmin OS=Homo sapiens GN=NPM1;>tr|Q9BTI9|Q9BTI	Nucleophosmin	32.575	294	1.6426	1.6855	30	0.43317	0.67786	28	53.7	63.9	1	1	12321000000	6760900000	5974900000	12364000000
UQCRH	>tr|Q567R0|Q567R0_HUMAN UQCRH protein OS=Homo sapiens GN=UQCRH PE=2 SV=1;>sp|P07919|QCR6_HUMAN Cytochrome b-c1 complex subunit 6, mitochondrial OS=Homo sapiens GN=UQCRH PE=1 SV=2	Cytochrome b-c1 complex subunit 6, mitochondrial	9.9533	85	1.636	1.6625	2	NA	NA	1	29.4	21.2	2	1	108800000	47156000	30554000	90042000
RRP1B	>sp|Q14684|RRP1B_HUMAN Ribosomal RNA processing protein 1 homolog B OS=Homo sapiens GN=RRP1B PE=1 SV=3;>sp|Q14684-2|RRP1B_HUMAN Isoform 2 of Ribosomal RNA processing protein 1 homolog B OS=Homo sapiens GN=RRP1B;>tr|Q6PJM8|Q6PJM8_HUMAN RRP1B protein (Fragme	Ribosomal RNA processing protein 1 homolog B	84.427	758	1.6276	1.6584	21	0.3789	0.59395	20	28.8	34.2	18	22	1034800000	664920000	558190000	1281300000
DDX41	>tr|Q53HI2|Q53HI2_HUMAN DEAD-box protein abstrakt variant (Fragment) OS=Homo sapiens PE=2 SV=1;>tr|J3KNN5|J3KNN5_HUMAN Probable ATP-dependent RNA helicase DDX41 (Fragment) OS=Homo sapiens GN=DDX41 PE=1 SV=1;>sp|Q9UJV9|DDX41_HUMAN Probable ATP-dependent RNA	Probable ATP-dependent RNA helicase DDX41	69.838	622	1.6195	1.6487	3	0.42835	0.74425	3	5.3	5.3	3	3	73128000	42757000	26754000	58701000
ZSCAN21	>tr|G3V1M0|G3V1M0_HUMAN Putative uncharacterized protein DKFZp686H10254 OS=Homo sapiens GN=ZSCAN21 PE=2 SV=2;>tr|B4DX96|B4DX96_HUMAN cDNA FLJ57646, highly similar to Zinc finger protein 38 OS=Homo sapiens PE=2 SV=1;>tr|A8K8A2|A8K8A2_HUMAN cDNA FLJ76930, hi	Zinc finger and SCAN domain-containing protein 21	49.338	436	1.7116	1.6466	8	0.4768	0.80852	10	19.5	19.3	6	6	235590000	180140000	148530000	293230000
NOP2	>sp|P46087|NOP2_HUMAN Probable 28S rRNA (cytosine(4447)-C(5))-methyltransferase OS=Homo sapiens GN=NOP2 PE=1 SV=2;>sp|P46087-4|NOP2_HUMAN Isoform 4 of Probable 28S rRNA (cytosine(4447)-C(5))-methyltransferase OS=Homo sapiens GN=NOP2;>tr|A0A087WV73|A0A087WV	Probable 28S rRNA (cytosine(4447)-C(5))-methyltransferase	89.301	812	1.6887	1.6417	18	0.42342	0.62892	16	30.8	26.2	22	19	1741000000	1057900000	488620000	1157100000
HTATSF1	>tr|B4DRS4|B4DRS4_HUMAN cDNA FLJ60139, highly similar to Homo sapiens HIV TAT specific factor 1 (HTATSF1), mRNA OS=Homo sapiens PE=2 SV=1;>sp|O43719|HTSF1_HUMAN HIV Tat-specific factor 1 OS=Homo sapiens GN=HTATSF1 PE=1 SV=1;>tr|Q5H919|Q5H919_HUMAN HIV Tat-	HIV Tat-specific factor 1	82.021	721	1.6063	1.639	3	0.50261	0.79605	3	3.5	2.5	3	2	73730000	47153000	17972000	33599000
GNL3	>tr|A0A024R2Z6|A0A024R2Z6_HUMAN Guanine nucleotide binding protein-like 3 (Nucleolar), isoform CRA_b OS=Homo sapiens GN=GNL3 PE=4 SV=1;>sp|Q9BVP2-2|GNL3_HUMAN Isoform 2 of Guanine nucleotide-binding protein-like 3 OS=Homo sapiens GN=GNL3;>sp|Q9BVP2|GNL3_HU	Guanine nucleotide-binding protein-like 3	60.572	537	1.7418	1.6385	11	0.38896	0.66032	9	21.8	24.4	12	11	637600000	368750000	177640000	417260000
MDC1	>sp|Q14676|MDC1_HUMAN Mediator of DNA damage checkpoint protein 1 OS=Homo sapiens GN=MDC1 PE=1 SV=3;>sp|Q14676-2|MDC1_HUMAN Isoform 2 of Mediator of DNA damage checkpoint protein 1 OS=Homo sapiens GN=MDC1;>sp|Q14676-3|MDC1_HUMAN Isoform 3 of Mediator of DN	Mediator of DNA damage checkpoint protein 1	226.66	2089	1.5928	1.63	63	0.27061	0.41775	54	34.2	38	52	58	8349600000	5476200000	3371900000	12778000000
ANAPC4	>sp|Q9UJX5|APC4_HUMAN Anaphase-promoting complex subunit 4 OS=Homo sapiens GN=ANAPC4 PE=1 SV=2;>sp|Q9UJX5-3|APC4_HUMAN Isoform 3 of Anaphase-promoting complex subunit 4 OS=Homo sapiens GN=ANAPC4;>tr|B3KN47|B3KN47_HUMAN cDNA FLJ13535 fis, clone PLACE1006506	Anaphase-promoting complex subunit 4	92.115	808	1.6716	1.6196	4	0.44241	0.71362	3	8.2	4.7	4	3	107710000	56177000	21745000	57012000
CHD7	>tr|A0A024R7V7|A0A024R7V7_HUMAN Chromodomain helicase DNA binding protein 7, isoform CRA_a OS=Homo sapiens GN=CHD7 PE=4 SV=1;>sp|Q9P2D1|CHD7_HUMAN Chromodomain-helicase-DNA-binding protein 7 OS=Homo sapiens GN=CHD7 PE=1 SV=3	Chromodomain-helicase-DNA-binding protein 7	337.57	3011	1.6036	1.6074	22	0.37195	0.60417	20	11.8	12	23	21	1342800000	1527800000	590900000	1196400000
SETD2	>sp|Q9BYW2|SETD2_HUMAN Histone-lysine N-methyltransferase SETD2 OS=Homo sapiens GN=SETD2 PE=1 SV=3;>tr|C9JG86|C9JG86_HUMAN Histone-lysine N-methyltransferase SETD2 (Fragment) OS=Homo sapiens GN=SETD2 PE=1 SV=1;>sp|Q9BYW2-3|SETD2_HUMAN Isoform 3 of Histone-	Histone-lysine N-methyltransferase SETD2	287.59	2564	1.7637	1.603	12	0.56574	0.94074	21	6.5	7.4	17	20	358030000	214510000	260320000	431320000
TOP2B	>sp|Q02880-2|TOP2B_HUMAN Isoform Beta-1 of DNA topoisomerase 2-beta OS=Homo sapiens GN=TOP2B;>sp|Q02880|TOP2B_HUMAN DNA topoisomerase 2-beta OS=Homo sapiens GN=TOP2B PE=1 SV=3;>tr|Q71UH4|Q71UH4_HUMAN DNA topoisomerase 2 (Fragment) OS=Homo sapiens GN=TOP2B	DNA topoisomerase 2-beta;DNA topoisomerase 2	182.66	1621	1.5612	1.5949	21	0.41099	0.67935	14	26	22.5	26	19	1022800000	586810000	460300000	1028200000
ZNF512;DKFZp666L156	>tr|G3XAG1|G3XAG1_HUMAN Zinc finger protein 512 OS=Homo sapiens GN=ZNF512 PE=4 SV=1;>sp|Q96ME7-3|ZN512_HUMAN Isoform 3 of Zinc finger protein 512 OS=Homo sapiens GN=ZNF512;>sp|Q96ME7|ZN512_HUMAN Zinc finger protein 512 OS=Homo sapiens GN=ZNF512 PE=1 SV=2;>	Zinc finger protein 512	64.594	566	1.5114	1.5887	11	0.33386	0.54005	13	31.3	38	12	15	699480000	415680000	386560000	960110000
COIL	>sp|P38432|COIL_HUMAN Coilin OS=Homo sapiens GN=COIL PE=1 SV=1	Coilin	62.608	576	1.7372	1.5839	13	0.51158	0.77569	6	28.6	14.8	16	8	1680800000	1008100000	341810000	673490000
PDCD11	>sp|Q14690|RRP5_HUMAN Protein RRP5 homolog OS=Homo sapiens GN=PDCD11 PE=1 SV=3	Protein RRP5 homolog	208.7	1871	1.6734	1.5769	4	0.41344	0.60224	10	2.9	5.8	5	10	48773000	31250000	57961000	131730000
BRIP1	>tr|A0A024QZ45|A0A024QZ45_HUMAN BRCA1 interacting protein C-terminal helicase 1, isoform CRA_a OS=Homo sapiens GN=BRIP1 PE=4 SV=1;>sp|Q9BX63|FANCJ_HUMAN Fanconi anemia group J protein OS=Homo sapiens GN=BRIP1 PE=1 SV=1;>tr|J3QSE8|J3QSE8_HUMAN Fanconi anemi	Fanconi anemia group J protein	140.87	1249	1.702	1.5758	8	0.44634	0.7084	3	7.8	5.2	9	6	205420000	104090000	49932000	88440000
ANKRD11	>sp|Q6UB99|ANR11_HUMAN Ankyrin repeat domain-containing protein 11 OS=Homo sapiens GN=ANKRD11 PE=1 SV=3;>tr|A8K4M9|A8K4M9_HUMAN cDNA FLJ78738, highly similar to Homo sapiens ankyrin repeat-containing cofactor-1 (ANCO1) mRNA (Fragment) OS=Homo sapiens PE=2	Ankyrin repeat domain-containing protein 11	297.91	2663	1.6761	1.5754	3	0.45007	0.71448	5	1.9	2.3	4	6	58590000	32290000	41040000	75119000
USP36	>tr|A0A024R8V6|A0A024R8V6_HUMAN Ubiquitin carboxyl-terminal hydrolase OS=Homo sapiens GN=USP36 PE=3 SV=1;>sp|Q9P275|UBP36_HUMAN Ubiquitin carboxyl-terminal hydrolase 36 OS=Homo sapiens GN=USP36 PE=1 SV=3;>sp|Q9P275-2|UBP36_HUMAN Isoform 2 of Ubiquitin carb	Ubiquitin carboxyl-terminal hydrolase;Ubiquitin carboxyl-terminal hydrolase 36	122.91	1123	1.6492	1.5725	8	0.42276	0.69565	9	7.9	9.3	8	9	216350000	128110000	115850000	256330000
ZNF281	>sp|Q9Y2X9|ZN281_HUMAN Zinc finger protein 281 OS=Homo sapiens GN=ZNF281 PE=1 SV=1;>sp|Q9Y2X9-2|ZN281_HUMAN Isoform 2 of Zinc finger protein 281 OS=Homo sapiens GN=ZNF281;>tr|B4DM04|B4DM04_HUMAN cDNA FLJ53394, highly similar to Zinc finger protein 281 OS=H	Zinc finger protein 281	96.914	895	1.5328	1.568	16	0.40788	0.62766	15	22.6	20.2	16	14	910730000	593140000	313590000	713820000
NCL	>tr|A0A024R4A0|A0A024R4A0_HUMAN Nucleolin, isoform CRA_b OS=Homo sapiens GN=NCL PE=4 SV=1;>sp|P19338|NUCL_HUMAN Nucleolin OS=Homo sapiens GN=NCL PE=1 SV=3;>tr|B3KTP9|B3KTP9_HUMAN cDNA FLJ38578 fis, clone HCHON2007674, highly similar to NUCLEOLIN OS=Homo sa	Nucleolin	76.613	710	1.5288	1.5627	40	0.51915	0.78106	38	39.3	37.5	38	37	10722000000	6900600000	5612300000	10188000000
DKFZp686P16143;DKFZp686C21148;DKFZp686I05169;STAG2;DKFZp686P168	>tr|B2R8Y6|B2R8Y6_HUMAN cDNA, FLJ94121, highly similar to Homo sapiens stromal antigen 2 (STAG2), mRNA OS=Homo sapiens PE=2 SV=1;>tr|Q6MZM4|Q6MZM4_HUMAN Putative uncharacterized protein DKFZp686P16143 OS=Homo sapiens GN=DKFZp686P16143 PE=2 SV=1;>tr|Q6MZM3|	Cohesin subunit SA-2	134.06	1162	1.7173	1.5606	5	0.45092	0.70555	4	5	3.2	4	2	116920000	64305000	25804000	50462000
CYC1	>tr|Q8TBT6|Q8TBT6_HUMAN Putative uncharacterized protein (Fragment) OS=Homo sapiens PE=2 SV=1;>sp|P08574|CY1_HUMAN Cytochrome c1, heme protein, mitochondrial OS=Homo sapiens GN=CYC1 PE=1 SV=3	Cytochrome c1, heme protein, mitochondrial	34.489	315	1.5328	1.5602	3	0.28224	0.45586	4	9.2	14.6	3	3	132160000	76504000	36703000	109230000
RREB1	>tr|A0A024QZU8|A0A024QZU8_HUMAN Ras responsive element binding protein 1, isoform CRA_a OS=Homo sapiens GN=RREB1 PE=4 SV=1;>sp|Q92766|RREB1_HUMAN Ras-responsive element-binding protein 1 OS=Homo sapiens GN=RREB1 PE=1 SV=3;>sp|Q92766-2|RREB1_HUMAN Isoform 2	Ras-responsive element-binding protein 1	181.42	1687	1.7005	1.5589	4	0.45177	0.77031	5	3.9	4.7	6	6	79980000	59093000	82053000	145760000
MYBL2	>sp|P10244|MYBB_HUMAN Myb-related protein B OS=Homo sapiens GN=MYBL2 PE=1 SV=1;>sp|P10244-2|MYBB_HUMAN Isoform 2 of Myb-related protein B OS=Homo sapiens GN=MYBL2	Myb-related protein B	78.763	700	1.6757	1.557	3	0.28504	0.48903	8	5.6	22.3	3	11	111990000	63195000	94892000	298540000
MLLT6	>tr|A0A087WW39|A0A087WW39_HUMAN Protein AF-17 OS=Homo sapiens GN=MLLT6 PE=1 SV=1;>tr|A0A024R1V5|A0A024R1V5_HUMAN Myeloid/lymphoid or mixed-lineage leukemia (Trithorax homolog, Drosophila) translocated to, 6, isoform CRA_a OS=Homo sapiens GN=MLLT6 PE=4 SV=1	Protein AF-17	112.05	1093	1.5325	1.5491	3	0.53254	0.85933	2	3	3	2	2	37131000	22268000	18486000	32812000
UBN2	>sp|Q6ZU65|UBN2_HUMAN Ubinuclein-2 OS=Homo sapiens GN=UBN2 PE=1 SV=2;>sp|Q6ZU65-2|UBN2_HUMAN Isoform 2 of Ubinuclein-2 OS=Homo sapiens GN=UBN2	Ubinuclein-2	146.09	1347	1.7642	1.5484	5	0.43593	0.69799	4	5.7	7.1	6	8	183340000	126040000	159140000	589490000
RPS17L;RPS17	>sp|P0CW22|RS17L_HUMAN 40S ribosomal protein S17-like OS=Homo sapiens GN=RPS17L PE=1 SV=1;>sp|P08708|RS17_HUMAN 40S ribosomal protein S17 OS=Homo sapiens GN=RPS17 PE=1 SV=2;>tr|H0YN88|H0YN88_HUMAN 40S ribosomal protein S17 OS=Homo sapiens GN=RPS17 PE=1 SV=	40S ribosomal protein S17-like;40S ribosomal protein S17	15.55	135	1.6545	1.5443	3	0.75751	1.1929	4	15.6	39.3	2	5	75384000	60986000	72988000	99606000
MGA	>tr|B9EGR5|B9EGR5_HUMAN MGA protein OS=Homo sapiens GN=MGA PE=2 SV=1;>sp|Q8IWI9-3|MGAP_HUMAN Isoform 3 of MAX gene-associated protein OS=Homo sapiens GN=MGA;>sp|Q8IWI9|MGAP_HUMAN MAX gene-associated protein OS=Homo sapiens GN=MGA PE=1 SV=3;>sp|Q8IWI9-4|MGA	MAX gene-associated protein	315.13	2856	1.5892	1.5397	12	0.47472	0.75365	9	6.3	5.5	14	12	401510000	243900000	129840000	280670000
ZHX3	>tr|A8K8Q0|A8K8Q0_HUMAN cDNA FLJ78753, highly similar to Homo sapiens zinc fingers and homeoboxes 3 (ZHX3), mRNA OS=Homo sapiens PE=2 SV=1;>sp|Q9H4I2|ZHX3_HUMAN Zinc fingers and homeoboxes protein 3 OS=Homo sapiens GN=ZHX3 PE=1 SV=3;>tr|H0Y6F5|H0Y6F5_HUMAN	Zinc fingers and homeoboxes protein 3	104.68	956	1.6325	1.5397	2	0.50594	0.80629	4	3.2	11.1	1	7	36937000	26964000	66933000	150720000
RFC1;LLDBP	>sp|P35251-2|RFC1_HUMAN Isoform 2 of Replication factor C subunit 1 OS=Homo sapiens GN=RFC1;>sp|P35251|RFC1_HUMAN Replication factor C subunit 1 OS=Homo sapiens GN=RFC1 PE=1 SV=4;>tr|Q14756|Q14756_HUMAN LLDBP (Fragment) OS=Homo sapiens GN=LLDBP PE=2 SV=1	Replication factor C subunit 1	128.18	1147	1.6684	1.5375	23	0.4241	0.662	12	24.2	21.3	23	19	1462100000	933700000	494400000	1337800000
ZBTB33	>sp|Q86T24|KAISO_HUMAN Transcriptional regulator Kaiso OS=Homo sapiens GN=ZBTB33 PE=1 SV=2	Transcriptional regulator Kaiso	74.484	672	1.4706	1.536	43	0.43692	0.70998	39	57.3	55.8	38	36	14396000000	10263000000	6682200000	14103000000
POGZ	>sp|Q7Z3K3-5|POGZ_HUMAN Isoform 5 of Pogo transposable element with ZNF domain OS=Homo sapiens GN=POGZ;>sp|Q7Z3K3-7|POGZ_HUMAN Isoform 7 of Pogo transposable element with ZNF domain OS=Homo sapiens GN=POGZ;>sp|Q7Z3K3-2|POGZ_HUMAN Isoform 2 of Pogo transpos	Pogo transposable element with ZNF domain	145.29	1315	1.7357	1.5234	3	0.26097	0.42534	4	2.3	5.9	3	6	47681000	34056000	26325000	135010000
PAXBP1	>sp|Q9Y5B6|PAXB1_HUMAN PAX3- and PAX7-binding protein 1 OS=Homo sapiens GN=PAXBP1 PE=1 SV=2;>sp|Q9Y5B6-2|PAXB1_HUMAN Isoform 2 of PAX3- and PAX7-binding protein 1 OS=Homo sapiens GN=PAXBP1;>tr|B3KSC0|B3KSC0_HUMAN cDNA FLJ35972 fis, clone TESTI2013264, high	PAX3- and PAX7-binding protein 1	104.8	917	1.6665	1.514	14	0.4066	0.64892	3	23.2	10.3	18	7	592910000	393330000	85300000	175580000
AFF4	>sp|Q9UHB7|AFF4_HUMAN AF4/FMR2 family member 4 OS=Homo sapiens GN=AFF4 PE=1 SV=1;>sp|Q9UHB7-2|AFF4_HUMAN Isoform 2 of AF4/FMR2 family member 4 OS=Homo sapiens GN=AFF4	AF4/FMR2 family member 4	127.46	1163	1.5259	1.5118	13	0.34884	0.55663	9	12.4	14.4	12	12	396960000	274520000	123980000	303480000
ZKSCAN4	>sp|Q969J2|ZKSC4_HUMAN Zinc finger protein with KRAB and SCAN domains 4 OS=Homo sapiens GN=ZKSCAN4 PE=1 SV=1;>tr|B7Z7H3|B7Z7H3_HUMAN cDNA FLJ57654, highly similar to Zinc finger protein 307 OS=Homo sapiens PE=2 SV=1	Zinc finger protein with KRAB and SCAN domains 4	61.579	545	1.394	1.5053	9	0.40674	0.71748	15	22.4	40.6	9	16	271960000	230630000	330090000	483470000
TRIM24	>tr|B4DYZ9|B4DYZ9_HUMAN cDNA FLJ53462, highly similar to Transcription intermediary factor 1-alpha OS=Homo sapiens PE=2 SV=1;>tr|A0A087X1V3|A0A087X1V3_HUMAN Transcription intermediary factor 1-alpha OS=Homo sapiens GN=TRIM24 PE=1 SV=1;>tr|A0A024R784|A0A024	Transcription intermediary factor 1-alpha	107.7	961	1.5709	1.5038	6	0.52825	0.83186	3	11.2	4.8	10	5	284460000	158860000	40572000	95140000
RAD21	>tr|A0A024R9J0|A0A024R9J0_HUMAN RAD21 homolog (S. pombe), isoform CRA_a OS=Homo sapiens GN=RAD21 PE=4 SV=1;>sp|O60216|RAD21_HUMAN Double-strand-break repair protein rad21 homolog OS=Homo sapiens GN=RAD21 PE=1 SV=2	Double-strand-break repair protein rad21 homolog	71.689	631	1.4441	1.4952	9	0.41534	0.6564	10	18.7	18.7	11	10	452280000	335870000	220930000	564020000
HEATR1	>tr|B2RWN5|B2RWN5_HUMAN HEAT repeat containing 1 OS=Homo sapiens GN=HEATR1 PE=2 SV=1;>sp|Q9H583|HEAT1_HUMAN HEAT repeat-containing protein 1 OS=Homo sapiens GN=HEATR1 PE=1 SV=3;>tr|Q5T3Q7|Q5T3Q7_HUMAN HEAT repeat-containing protein 1 OS=Homo sapiens GN=HEA	HEAT repeat-containing protein 1;HEAT repeat-containing protein 1, N-terminally processed	242.26	2144	1.5587	1.4917	11	0.47467	0.77661	8	8.6	5.5	15	9	263800000	172740000	94135000	191500000
GTF2E2	>sp|P29084|T2EB_HUMAN Transcription initiation factor IIE subunit beta OS=Homo sapiens GN=GTF2E2 PE=1 SV=1	Transcription initiation factor IIE subunit beta	33.043	291	1.4729	1.4917	5	NA	NA	1	17.5	3.8	5	1	72151000	48199000	10584000	20541000
HEL-S-39;PPIB	>tr|V9HWC6|V9HWC6_HUMAN Peptidyl-prolyl cis-trans isomerase OS=Homo sapiens GN=HEL-S-39 PE=2 SV=1;>sp|P23284|PPIB_HUMAN Peptidyl-prolyl cis-trans isomerase B OS=Homo sapiens GN=PPIB PE=1 SV=2	Peptidyl-prolyl cis-trans isomerase;Peptidyl-prolyl cis-trans isomerase B	22.742	208	1.4749	1.4913	2	0.41324	0.65677	3	13	13.5	3	3	29976000	24491000	44564000	65651000
NSD1	>tr|B2RWP5|B2RWP5_HUMAN Nuclear receptor binding SET domain protein 1 OS=Homo sapiens GN=NSD1 PE=2 SV=1;>sp|Q96L73-2|NSD1_HUMAN Isoform 2 of Histone-lysine N-methyltransferase, H3 lysine-36 and H4 lysine-20 specific OS=Homo sapiens GN=NSD1;>sp|Q96L73-3|NSD	Histone-lysine N-methyltransferase, H3 lysine-36 and H4 lysine-20 specific	267.35	2427	1.6598	1.4891	3	0.34212	0.53637	5	1.9	2.6	3	5	29009000	19646000	38191000	96051000
GPATCH4	>tr|A0A0A0MRK1|A0A0A0MRK1_HUMAN G patch domain-containing protein 4 OS=Homo sapiens GN=GPATCH4 PE=4 SV=1;>tr|E9PAV9|E9PAV9_HUMAN G patch domain-containing protein 4 OS=Homo sapiens GN=GPATCH4 PE=1 SV=1;>tr|A8KAG1|A8KAG1_HUMAN cDNA FLJ77219 OS=Homo sapiens	G patch domain-containing protein 4	42.054	370	1.4623	1.4884	9	0.53251	0.87173	4	25.7	21.4	7	6	271090000	165790000	92544000	349520000
SRFBP1	>sp|Q8NEF9|SRFB1_HUMAN Serum response factor-binding protein 1 OS=Homo sapiens GN=SRFBP1 PE=1 SV=1	Serum response factor-binding protein 1	48.633	429	1.5228	1.4865	13	0.5698	0.87765	7	29.6	22.1	12	9	894290000	565730000	399780000	576920000
CCDC137	>tr|H6QX63|H6QX63_HUMAN Hepatocellular carcinoma related protein 2 OS=Homo sapiens PE=2 SV=1;>sp|Q6PK04|CC137_HUMAN Coiled-coil domain-containing protein 137 OS=Homo sapiens GN=CCDC137 PE=1 SV=1;>tr|I3L0U5|I3L0U5_HUMAN Coiled-coil domain-containing protein	Coiled-coil domain-containing protein 137	34.861	305	1.3835	1.4828	2	0.4051	0.65657	4	7.2	24.3	2	7	23412000	13503000	54900000	135580000
CWC22	>tr|B7WP74|B7WP74_HUMAN Pre-mRNA-splicing factor CWC22 homolog (Fragment) OS=Homo sapiens GN=CWC22 PE=1 SV=1;>sp|Q9HCG8|CWC22_HUMAN Pre-mRNA-splicing factor CWC22 homolog OS=Homo sapiens GN=CWC22 PE=1 SV=3	Pre-mRNA-splicing factor CWC22 homolog	85.576	745	1.4584	1.478	3	NA	NA	1	3.5	2.1	3	1	32992000	31259000	10978000	20477000
C17orf85	>sp|Q53F19|CQ085_HUMAN Uncharacterized protein C17orf85 OS=Homo sapiens GN=C17orf85 PE=1 SV=2;>sp|Q53F19-2|CQ085_HUMAN Isoform 2 of Uncharacterized protein C17orf85 OS=Homo sapiens GN=C17orf85	Uncharacterized protein C17orf85	70.592	620	1.4405	1.4674	8	0.52357	0.81949	5	12.7	11.1	8	7	134120000	83904000	114070000	175200000
TOX4	>tr|B4DJ39|B4DJ39_HUMAN cDNA FLJ54357, highly similar to Epidermal Langerhans cell protein LCP1 OS=Homo sapiens PE=2 SV=1;>sp|O94842-3|TOX4_HUMAN Isoform 3 of TOX high mobility group box family member 4 OS=Homo sapiens GN=TOX4;>sp|O94842-2|TOX4_HUMAN Isofo	TOX high mobility group box family member 4	59.39	549	1.3975	1.467	16	0.43372	0.64907	18	27.1	29.7	13	13	8186200000	5095400000	3271100000	6913300000
WAPAL	>tr|B2RTX8|B2RTX8_HUMAN WAPAL protein OS=Homo sapiens GN=WAPAL PE=2 SV=1;>sp|Q7Z5K2|WAPL_HUMAN Wings apart-like protein homolog OS=Homo sapiens GN=WAPAL PE=1 SV=1;>sp|Q7Z5K2-2|WAPL_HUMAN Isoform 2 of Wings apart-like protein homolog OS=Homo sapiens GN=WAPA	Wings apart-like protein homolog	132.22	1184	1.4399	1.4667	55	0.51118	0.8298	44	44.3	47.9	43	43	4019300000	2631500000	2186900000	3656100000
ZNF644	>tr|A7E234|A7E234_HUMAN ZNF644 protein OS=Homo sapiens GN=ZNF644 PE=2 SV=1;>sp|Q9H582|ZN644_HUMAN Zinc finger protein 644 OS=Homo sapiens GN=ZNF644 PE=1 SV=2;>sp|Q9H582-2|ZN644_HUMAN Isoform 2 of Zinc finger protein 644 OS=Homo sapiens GN=ZNF644;>tr|Q9H835	Zinc finger protein 644	149.42	1326	1.545	1.4598	2	0.35669	0.56428	3	1.4	2.9	2	3	13701000	7250300	15992000	55573000
FANCI	>tr|F8W7R3|F8W7R3_HUMAN Fanconi anemia group I protein OS=Homo sapiens GN=FANCI PE=1 SV=1;>tr|B3KNW8|B3KNW8_HUMAN cDNA FLJ30614 fis, clone CTONG2001139 OS=Homo sapiens PE=2 SV=1;>tr|B7ZMF2|B7ZMF2_HUMAN Fanconi anemia, complementation group I OS=Homo sapien	Fanconi anemia group I protein	123.24	1095	1.602	1.4543	2	NA	NA	1	2.4	1	2	1	9666900	6484400	3196200	5955600
EXOSC9	>tr|B4DXG8|B4DXG8_HUMAN cDNA FLJ55260, highly similar to Exosome complex exonuclease RRP45 (EC 3.1.13.-) OS=Homo sapiens PE=2 SV=1;>tr|D6RIY6|D6RIY6_HUMAN Exosome complex component RRP45 OS=Homo sapiens GN=EXOSC9 PE=1 SV=1;>tr|A5PLM5|A5PLM5_HUMAN Exosome c	Exosome complex component RRP45	43.561	392	1.5226	1.4483	2	0.63842	1.0316	2	5.4	5.4	2	2	54842000	37007000	31852000	43684000
ZNF384	>tr|D3DUR9|D3DUR9_HUMAN Zinc finger protein 384, isoform CRA_a OS=Homo sapiens GN=ZNF384 PE=4 SV=1;>sp|Q8TF68-3|ZN384_HUMAN Isoform 3 of Zinc finger protein 384 OS=Homo sapiens GN=ZNF384;>sp|Q8TF68-2|ZN384_HUMAN Isoform 2 of Zinc finger protein 384 OS=Homo	Zinc finger protein 384	63.09	576	1.4041	1.4475	3	0.495	0.81363	4	12.7	10.9	3	3	202390000	151300000	86915000	147470000
ATAD3A;ATAD3B;DKFZp761L1023	>tr|H0Y2W2|H0Y2W2_HUMAN ATPase family AAA domain-containing protein 3A (Fragment) OS=Homo sapiens GN=ATAD3A PE=1 SV=1;>tr|Q96T67|Q96T67_HUMAN TOB3 OS=Homo sapiens PE=2 SV=1;>sp|Q9NVI7-3|ATD3A_HUMAN Isoform 3 of ATPase family AAA domain-containing protein 3	ATPase family AAA domain-containing protein 3A;ATPase family AAA domain-containing protein 3B	64.243	572	1.4364	1.4443	3	0.57556	0.92125	3	4.7	4.7	3	3	79868000	40430000	16130000	24969000
NR2C2	>tr|F2YGU2|F2YGU2_HUMAN Nuclear receptor subfamily 2, group C, member 2, isoform CRA_a OS=Homo sapiens GN=NR2C2 PE=2 SV=1;>sp|P49116-2|NR2C2_HUMAN Isoform 2 of Nuclear receptor subfamily 2 group C member 2 OS=Homo sapiens GN=NR2C2;>sp|P49116|NR2C2_HUMAN Nu	Nuclear receptor subfamily 2 group C member 2	67.344	615	1.4019	1.4405	3	0.33725	0.52407	2	9.8	4.4	5	2	137690000	91246000	6509600	15992000
ZNF148	>tr|Q8TDH4|Q8TDH4_HUMAN CLL-associated antigen KW-10 OS=Homo sapiens PE=2 SV=1;>sp|Q9UQR1|ZN148_HUMAN Zinc finger protein 148 OS=Homo sapiens GN=ZNF148 PE=1 SV=2;>tr|B2RAI2|B2RAI2_HUMAN cDNA, FLJ94931, highly similar to Homo sapiens zinc finger protein 148	Zinc finger protein 148	88.987	794	1.3997	1.4396	14	0.502	0.76868	17	24.3	33.6	15	19	951930000	623920000	1212800000	1114200000
HMG20A	>tr|B4DMG1|B4DMG1_HUMAN cDNA FLJ57155, highly similar to High mobility group protein 20A OS=Homo sapiens PE=2 SV=1;>sp|Q9NP66|HM20A_HUMAN High mobility group protein 20A OS=Homo sapiens GN=HMG20A PE=1 SV=1;>tr|H0YKL0|H0YKL0_HUMAN High mobility group protei	High mobility group protein 20A	27.751	234	1.452	1.433	3	0.4737	0.75739	4	21.8	24.8	4	4	60080000	47013000	74150000	131000000
YEATS2	>sp|Q9ULM3|YETS2_HUMAN YEATS domain-containing protein 2 OS=Homo sapiens GN=YEATS2 PE=1 SV=2	YEATS domain-containing protein 2	150.78	1422	1.4775	1.4306	25	0.569	0.91501	29	21.3	24.2	26	30	1187200000	793750000	597530000	1058300000
RRP15	>tr|A8K201|A8K201_HUMAN cDNA FLJ75605, highly similar to Homo sapiens CGI-115 protein (CGI-115), mRNA OS=Homo sapiens PE=2 SV=1;>sp|Q9Y3B9|RRP15_HUMAN RRP15-like protein OS=Homo sapiens GN=RRP15 PE=1 SV=2	RRP15-like protein	28.915	259	1.4428	1.4294	6	0.41911	0.68419	3	29.3	12.4	7	3	275810000	182530000	40984000	103110000
ALYREF	>sp|Q86V81|THOC4_HUMAN THO complex subunit 4 OS=Homo sapiens GN=ALYREF PE=1 SV=3;>tr|E9PB61|E9PB61_HUMAN THO complex subunit 4 OS=Homo sapiens GN=ALYREF PE=1 SV=1	THO complex subunit 4	26.888	257	1.3559	1.4293	7	0.51235	0.84289	6	22.2	36.6	5	8	499080000	355530000	497000000	348330000
MCM4	>tr|B4DLA6|B4DLA6_HUMAN cDNA FLJ54365, highly similar to DNA replication licensing factor MCM4 OS=Homo sapiens PE=2 SV=1;>tr|B3KMX0|B3KMX0_HUMAN cDNA FLJ12837 fis, clone NT2RP2003228, highly similar to DNA replication licensing factor MCM4 OS=Homo sapiens	DNA replication licensing factor MCM4	92.722	823	1.4045	1.4232	3	0.30722	0.48988	2	3.2	2.2	3	2	44381000	30624000	16406000	36460000
KRI1;FLJ12949	>tr|B4DUT2|B4DUT2_HUMAN cDNA FLJ53206 OS=Homo sapiens PE=2 SV=1;>sp|Q8N9T8|KRI1_HUMAN Protein KRI1 homolog OS=Homo sapiens GN=KRI1 PE=1 SV=3;>tr|A0A024R7C4|A0A024R7C4_HUMAN Uncharacterized protein OS=Homo sapiens GN=FLJ12949 PE=4 SV=1;>tr|B4DUY9|B4DUY9_HUM	Protein KRI1 homolog	88.194	757	1.3881	1.421	10	0.33449	0.55038	8	19	12.8	11	8	580910000	367090000	161110000	460280000
RBM28	>tr|A0A024R753|A0A024R753_HUMAN RNA binding motif protein 28, isoform CRA_a OS=Homo sapiens GN=RBM28 PE=4 SV=1;>sp|Q9NW13|RBM28_HUMAN RNA-binding protein 28 OS=Homo sapiens GN=RBM28 PE=1 SV=3;>sp|Q9NW13-2|RBM28_HUMAN Isoform 2 of RNA-binding protein 28 OS=	RNA-binding protein 28	85.737	759	1.5153	1.4189	5	0.52901	0.85088	7	11.9	10.8	8	8	217210000	150820000	90718000	176430000
SDHB	>sp|P21912|SDHB_HUMAN Succinate dehydrogenase [ubiquinone] iron-sulfur subunit, mitochondrial OS=Homo sapiens GN=SDHB PE=1 SV=3;>tr|A0A087WXX8|A0A087WXX8_HUMAN Succinate dehydrogenase [ubiquinone] iron-sulfur subunit, mitochondrial (Fragment) OS=Homo sapie	Succinate dehydrogenase [ubiquinone] iron-sulfur subunit, mitochondrial	31.629	280	1.4682	1.4186	4	0.4082	0.64589	6	23.2	25.7	6	7	347820000	243300000	185310000	437750000
UQCRC1	>tr|B4DUL5|B4DUL5_HUMAN cDNA FLJ51625, highly similar to Ubiquinol-cytochrome-c reductase complex coreprotein I, mitochondrial (EC 1.10.2.2) OS=Homo sapiens PE=2 SV=1;>sp|P31930|QCR1_HUMAN Cytochrome b-c1 complex subunit 1, mitochondrial OS=Homo sapiens GN	Cytochrome b-c1 complex subunit 1, mitochondrial	40.372	365	1.3702	1.4148	2	0.45324	0.73818	4	11.2	13.4	3	4	56119000	48666000	74732000	141190000
PRKDC	>sp|P78527-2|PRKDC_HUMAN Isoform 2 of DNA-dependent protein kinase catalytic subunit OS=Homo sapiens GN=PRKDC;>sp|P78527|PRKDC_HUMAN DNA-dependent protein kinase catalytic subunit OS=Homo sapiens GN=PRKDC PE=1 SV=3	DNA-dependent protein kinase catalytic subunit	465.5	4097	1.4208	1.4146	17	0.40461	0.64621	16	8.7	8	30	28	605260000	607320000	319900000	676080000
CEBPZ	>sp|Q03701|CEBPZ_HUMAN CCAAT/enhancer-binding protein zeta OS=Homo sapiens GN=CEBPZ PE=1 SV=3;>tr|B2R5U7|B2R5U7_HUMAN cDNA, FLJ92633, highly similar to Homo sapiens CCAAT-box-binding transcription factor (CBF2), mRNA OS=Homo sapiens PE=2 SV=1;>tr|A0A087X1N	CCAAT/enhancer-binding protein zeta	120.97	1054	1.514	1.4143	3	0.38437	0.6145	5	5.4	6.3	5	5	127040000	126480000	44059000	74738000
RBM19	>tr|A0A024RBL4|A0A024RBL4_HUMAN RNA binding motif protein 19, isoform CRA_a OS=Homo sapiens GN=RBM19 PE=4 SV=1;>sp|Q9Y4C8|RBM19_HUMAN Probable RNA-binding protein 19 OS=Homo sapiens GN=RBM19 PE=1 SV=3;>tr|H0YIL2|H0YIL2_HUMAN Probable RNA-binding protein 19	Probable RNA-binding protein 19	86.81	777	1.4745	1.406	2	NA	NA	0	3	0	2	0	21915000	16718000	0	0
BRCA2	>sp|P51587|BRCA2_HUMAN Breast cancer type 2 susceptibility protein OS=Homo sapiens GN=BRCA2 PE=1 SV=2;>tr|A1YBP1|A1YBP1_HUMAN Breast and ovarian cancer susceptibility protein 2 truncated variant OS=Homo sapiens GN=BRCA2 PE=2 SV=1	Breast cancer type 2 susceptibility protein	384.22	3418	1.4824	1.4044	2	0.42753	0.66908	3	1.2	1.1	3	3	20726000	13147000	17545000	35816000
DDX21	>sp|Q9NR30|DDX21_HUMAN Nucleolar RNA helicase 2 OS=Homo sapiens GN=DDX21 PE=1 SV=5;>sp|Q9NR30-2|DDX21_HUMAN Isoform 2 of Nucleolar RNA helicase 2 OS=Homo sapiens GN=DDX21	Nucleolar RNA helicase 2	87.343	783	1.44	1.404	43	0.47917	0.80468	27	48	39.6	32	26	3550500000	2570300000	1290000000	2310600000
TAF1;TAF1L	>sp|P21675-6|TAF1_HUMAN Isoform 2c of Transcription initiation factor TFIID subunit 1 OS=Homo sapiens GN=TAF1;>sp|P21675-7|TAF1_HUMAN Isoform 2d of Transcription initiation factor TFIID subunit 1 OS=Homo sapiens GN=TAF1;>sp|P21675-3|TAF1_HUMAN Isoform 3 of	Transcription initiation factor TFIID subunit 1;Transcription initiation factor TFIID subunit 1-like	204.92	1801	1.331	1.4021	31	0.49779	0.78538	18	18.8	15.5	31	23	1230000000	903400000	600180000	1213900000
CWC25	>sp|Q9NXE8|CWC25_HUMAN Pre-mRNA-splicing factor CWC25 homolog OS=Homo sapiens GN=CWC25 PE=1 SV=1;>tr|B4DJK2|B4DJK2_HUMAN cDNA FLJ52308 OS=Homo sapiens PE=2 SV=1;>tr|B4DZL1|B4DZL1_HUMAN cDNA FLJ55385 OS=Homo sapiens PE=2 SV=1;>tr|B7Z9W2|B7Z9W2_HUMAN cDNA, F	Pre-mRNA-splicing factor CWC25 homolog	49.647	425	1.3933	1.3935	2	0.44853	0.74473	3	6.6	8.2	3	4	73478000	41515000	36044000	45244000
CDK11A;CDK11B;CDC2L1;CDC2L2	>tr|Q5QPR4|Q5QPR4_HUMAN Cyclin-dependent kinase 11A OS=Homo sapiens GN=CDK11A PE=4 SV=1;>tr|J3QR29|J3QR29_HUMAN Cyclin-dependent kinase 11B OS=Homo sapiens GN=CDK11B PE=1 SV=2;>tr|B4E3D9|B4E3D9_HUMAN cDNA FLJ59152, highly similar to PITSLRE serine/threonin	Cyclin-dependent kinase 11B;Cyclin-dependent kinase 11A	86.823	746	1.3539	1.3898	9	0.4993	0.81165	4	10.3	9.5	8	7	357840000	222230000	113560000	169200000
CHD1	>sp|O14646-2|CHD1_HUMAN Isoform 2 of Chromodomain-helicase-DNA-binding protein 1 OS=Homo sapiens GN=CHD1;>sp|O14646|CHD1_HUMAN Chromodomain-helicase-DNA-binding protein 1 OS=Homo sapiens GN=CHD1 PE=1 SV=2	Chromodomain-helicase-DNA-binding protein 1	196.59	1709	1.5638	1.3885	7	0.5453	0.87654	9	5.3	5.7	6	7	116800000	97173000	108010000	207130000
GPATCH1	>tr|A8K8Y8|A8K8Y8_HUMAN cDNA FLJ77796, highly similar to Homo sapiens evolutionarily conserved G-patch domain containing protein mRNA OS=Homo sapiens PE=2 SV=1;>sp|Q9BRR8|GPTC1_HUMAN G patch domain-containing protein 1 OS=Homo sapiens GN=GPATCH1 PE=1 SV=1;	G patch domain-containing protein 1	103.33	931	1.3513	1.3861	19	0.47178	0.76004	19	29.9	34.8	20	22	1243200000	882770000	657480000	1531300000
KIF4A	>sp|O95239|KIF4A_HUMAN Chromosome-associated kinesin KIF4A OS=Homo sapiens GN=KIF4A PE=1 SV=3;>tr|Q59HG1|Q59HG1_HUMAN Kinesin-like protein (Fragment) OS=Homo sapiens PE=2 SV=1;>sp|O95239-2|KIF4A_HUMAN Isoform 2 of Chromosome-associated kinesin KIF4A OS=Hom	Chromosome-associated kinesin KIF4A	139.88	1232	1.4709	1.3834	17	0.57005	0.90432	18	22.4	21.7	24	22	864880000	631730000	512750000	752410000
ATAD5	>sp|Q96QE3|ATAD5_HUMAN ATPase family AAA domain-containing protein 5 OS=Homo sapiens GN=ATAD5 PE=1 SV=4;>tr|A0A075B754|A0A075B754_HUMAN ATPase family AAA domain-containing protein 5 OS=Homo sapiens GN=ATAD5 PE=1 SV=1;>sp|Q96QE3-2|ATAD5_HUMAN Isoform 2 of A	ATPase family AAA domain-containing protein 5	207.57	1844	1.4741	1.383	5	0.63423	1.0047	3	5	4.2	8	6	201840000	181540000	323480000	120340000
DDX1	>tr|F1T0B3|F1T0B3_HUMAN ATP-dependent RNA helicase DDX1 OS=Homo sapiens GN=DDX1 PE=1 SV=1;>tr|A0A087X2G1|A0A087X2G1_HUMAN ATP-dependent RNA helicase DDX1 OS=Homo sapiens GN=DDX1 PE=1 SV=1;>tr|A3RJH1|A3RJH1_HUMAN ATP-dependent RNA helicase DDX1 OS=Homo sapi	ATP-dependent RNA helicase DDX1	73.915	659	1.3319	1.3816	3	0.83207	1.3777	5	5.8	13.1	3	7	186100000	52305000	112410000	120040000
UBTF	>tr|E9PKP7|E9PKP7_HUMAN Nucleolar transcription factor 1 OS=Homo sapiens GN=UBTF PE=1 SV=1;>sp|P17480-2|UBF1_HUMAN Isoform UBF2 of Nucleolar transcription factor 1 OS=Homo sapiens GN=UBTF;>sp|P17480|UBF1_HUMAN Nucleolar transcription factor 1 OS=Homo sapie	Nucleolar transcription factor 1	87.435	745	1.3701	1.3674	6	0.43542	0.69888	6	11.4	14	8	10	255660000	165610000	253540000	491070000
NOP16	>sp|Q9Y3C1|NOP16_HUMAN Nucleolar protein 16 OS=Homo sapiens GN=NOP16 PE=1 SV=2;>tr|D6RIC3|D6RIC3_HUMAN Nucleolar protein 16 OS=Homo sapiens GN=NOP16 PE=1 SV=1;>tr|Q6PIM0|Q6PIM0_HUMAN NOP16 protein OS=Homo sapiens GN=NOP16 PE=1 SV=1;>tr|A0A087X2G6|A0A087X2G	Nucleolar protein 16	21.188	178	1.3481	1.3641	2	0.66894	1.0733	3	7.9	20.2	2	3	28938000	19200000	33119000	48502000
SLC35F3	>sp|Q8IY50-2|S35F3_HUMAN Isoform 2 of Putative thiamine transporter SLC35F3 OS=Homo sapiens GN=SLC35F3;>sp|Q8IY50|S35F3_HUMAN Putative thiamine transporter SLC35F3 OS=Homo sapiens GN=SLC35F3 PE=2 SV=2	Solute carrier family 35 member F3	54.773	490	1.3454	1.3615	2	0.73589	1.1086	2	2.9	2.9	2	2	274960000	198270000	219490000	284120000
CDC73	>sp|Q6P1J9|CDC73_HUMAN Parafibromin OS=Homo sapiens GN=CDC73 PE=1 SV=1;>tr|B4DV47|B4DV47_HUMAN cDNA FLJ57893, highly similar to Parafibromin OS=Homo sapiens PE=2 SV=1	Parafibromin	60.576	531	1.5254	1.3596	3	0.68318	1.0733	3	6.2	7	3	3	64623000	32518000	20135000	40153000
KNOP1	>sp|Q1ED39|KNOP1_HUMAN Lysine-rich nucleolar protein 1 OS=Homo sapiens GN=KNOP1 PE=1 SV=1	Lysine-rich nucleolar protein 1	51.588	458	1.3378	1.3575	39	0.39123	0.6287	36	59	49.6	28	26	2983400000	2239300000	1315300000	3246500000
NBN	>tr|A8K1D3|A8K1D3_HUMAN Nibrin OS=Homo sapiens PE=2 SV=1;>tr|A6H8Y5|A6H8Y5_HUMAN Nibrin OS=Homo sapiens GN=NBN PE=2 SV=1;>sp|O60934|NBN_HUMAN Nibrin OS=Homo sapiens GN=NBN PE=1 SV=1;>tr|A0PJ71|A0PJ71_HUMAN NBN protein (Fragment) OS=Homo sapiens GN=NBN PE=2	Nibrin	84.927	754	1.3143	1.3453	6	0.45618	0.75338	5	15.1	12.2	10	9	331070000	299320000	107120000	221700000
RSBN1L	>tr|A0A087X239|A0A087X239_HUMAN Round spermatid basic protein 1-like protein OS=Homo sapiens GN=RSBN1L PE=1 SV=1;>sp|Q6PCB5|RSBNL_HUMAN Round spermatid basic protein 1-like protein OS=Homo sapiens GN=RSBN1L PE=1 SV=2;>sp|Q6PCB5-2|RSBNL_HUMAN Isoform 2 of R	Round spermatid basic protein 1-like protein	94.611	843	1.3466	1.3438	6	0.48488	0.77283	7	9.3	14.1	6	8	168410000	112780000	109640000	222590000
ZNF362	>sp|Q5T0B9|ZN362_HUMAN Zinc finger protein 362 OS=Homo sapiens GN=ZNF362 PE=1 SV=1	Zinc finger protein 362	45.814	420	1.3514	1.3423	7	0.31151	0.52341	4	19.3	11	4	2	185840000	127720000	60323000	155400000
MYBBP1A	>tr|I3L1L3|I3L1L3_HUMAN Myb-binding protein 1A (Fragment) OS=Homo sapiens GN=MYBBP1A PE=1 SV=1;>sp|Q9BQG0|MBB1A_HUMAN Myb-binding protein 1A OS=Homo sapiens GN=MYBBP1A PE=1 SV=2;>sp|Q9BQG0-2|MBB1A_HUMAN Isoform 2 of Myb-binding protein 1A OS=Homo sapiens G	Myb-binding protein 1A	140.13	1252	1.3637	1.3358	5	0.46655	0.73929	7	5.9	5.2	6	7	117610000	90245000	52644000	100160000
BEND3	>sp|Q5T5X7|BEND3_HUMAN BEN domain-containing protein 3 OS=Homo sapiens GN=BEND3 PE=1 SV=1	BEN domain-containing protein 3	94.474	828	1.2951	1.3338	4	0.38534	0.61746	3	5.9	5.2	4	3	49481000	41468000	21410000	55412000
GPKOW	>sp|Q92917|GPKOW_HUMAN G patch domain and KOW motifs-containing protein OS=Homo sapiens GN=GPKOW PE=1 SV=2	G patch domain and KOW motifs-containing protein	52.228	476	1.3223	1.3317	6	0.5143	0.82234	5	18.5	14.1	7	6	143370000	160600000	44470000	95384000
SCAF11;SFRS2IP	>tr|B2RA91|B2RA91_HUMAN cDNA, FLJ94773, highly similar to Homo sapiens splicing factor, arginine/serine-rich 2, interacting protein (SFRS2IP), mRNA OS=Homo sapiens PE=2 SV=1;>tr|F8VXG7|F8VXG7_HUMAN Protein SCAF11 OS=Homo sapiens GN=SCAF11 PE=1 SV=1;>sp|Q99	Protein SCAF11	128.92	1148	1.3305	1.329	6	0.48651	0.79997	6	9.4	10.5	9	8	289860000	179430000	412670000	300050000
CPSF7	>tr|F5H669|F5H669_HUMAN Cleavage and polyadenylation-specificity factor subunit 7 (Fragment) OS=Homo sapiens GN=CPSF7 PE=1 SV=1;>tr|B4DGF8|B4DGF8_HUMAN cDNA FLJ57877, highly similar to Cleavage and polyadenylation specificity factor 7 OS=Homo sapiens PE=2	Cleavage and polyadenylation specificity factor subunit 7	41.265	374	1.4023	1.3226	2	0.5633	0.92742	3	6.1	7.8	2	3	45346000	31098000	32756000	50764000
CWC15;HSPC148	>sp|Q9P013|CWC15_HUMAN Spliceosome-associated protein CWC15 homolog OS=Homo sapiens GN=CWC15 PE=1 SV=2;>tr|A0A024R3B4|A0A024R3B4_HUMAN Uncharacterized protein OS=Homo sapiens GN=HSPC148 PE=4 SV=1;>tr|A0A024R3C8|A0A024R3C8_HUMAN Uncharacterized protein OS=H	Spliceosome-associated protein CWC15 homolog	26.624	229	1.3311	1.3215	8	0.67659	1.0582	6	20.1	12.2	7	5	1032100000	763670000	458650000	615640000
PDS5A	>tr|G1UI16|G1UI16_HUMAN SCC-112 protein, isoform CRA_b OS=Homo sapiens GN=PDS5A PE=2 SV=1;>sp|Q29RF7|PDS5A_HUMAN Sister chromatid cohesion protein PDS5 homolog A OS=Homo sapiens GN=PDS5A PE=1 SV=1;>sp|Q29RF7-3|PDS5A_HUMAN Isoform 2 of Sister chromatid cohe	Sister chromatid cohesion protein PDS5 homolog A	150.83	1337	1.31	1.3208	15	0.52557	0.83586	12	14.7	16.2	14	13	395090000	311170000	216120000	423540000
CTCF	>sp|P49711|CTCF_HUMAN Transcriptional repressor CTCF OS=Homo sapiens GN=CTCF PE=1 SV=1;>sp|P49711-2|CTCF_HUMAN Isoform 2 of Transcriptional repressor CTCF OS=Homo sapiens GN=CTCF	Transcriptional repressor CTCF	82.785	727	1.2795	1.3207	16	0.42161	0.73326	12	16.6	14.2	12	11	266190000	194420000	114110000	244430000
WDR43	>sp|Q15061|WDR43_HUMAN WD repeat-containing protein 43 OS=Homo sapiens GN=WDR43 PE=1 SV=3	WD repeat-containing protein 43	74.89	677	1.2971	1.3199	3	0.49472	0.77876	5	5.5	14.2	4	8	85240000	836120000	73056000	156130000
EBNA1BP2	>tr|Q6IB29|Q6IB29_HUMAN EBNA1 binding protein 2 OS=Homo sapiens GN=EBNA1BP2 PE=2 SV=1;>tr|H7C2Q8|H7C2Q8_HUMAN EBNA1 binding protein 2, isoform CRA_d OS=Homo sapiens GN=EBNA1BP2 PE=1 SV=1;>sp|Q99848|EBP2_HUMAN Probable rRNA-processing protein EBP2 OS=Homo s	Probable rRNA-processing protein EBP2	34.852	306	1.3535	1.3155	8	0.44856	0.74354	6	30.4	20.3	9	7	302150000	210150000	142160000	307990000
CDCA2	>sp|Q69YH5|CDCA2_HUMAN Cell division cycle-associated protein 2 OS=Homo sapiens GN=CDCA2 PE=1 SV=2;>tr|E9PEI0|E9PEI0_HUMAN Cell division cycle-associated protein 2 OS=Homo sapiens GN=CDCA2 PE=1 SV=1;>tr|A8K8Z0|A8K8Z0_HUMAN cDNA FLJ78763 OS=Homo sapiens PE=	Cell division cycle-associated protein 2	112.68	1023	1.4201	1.3149	10	0.4133	0.68818	11	17.3	19	13	14	409820000	317930000	395500000	828240000
CHAMP1	>sp|Q96JM3|CHAP1_HUMAN Chromosome alignment-maintaining phosphoprotein 1 OS=Homo sapiens GN=CHAMP1 PE=1 SV=2	Chromosome alignment-maintaining phosphoprotein 1	89.098	812	1.3555	1.3118	32	0.35983	0.60459	29	36	36.9	29	29	2357700000	1879300000	986220000	2486100000
DDX18	>tr|Q4ZG72|Q4ZG72_HUMAN Putative uncharacterized protein DDX18 (Fragment) OS=Homo sapiens GN=DDX18 PE=3 SV=1;>tr|A0A024RAH8|A0A024RAH8_HUMAN DEAD (Asp-Glu-Ala-Asp) box polypeptide 18, isoform CRA_b OS=Homo sapiens GN=DDX18 PE=3 SV=1;>sp|Q9NVP1|DDX18_HUMAN	ATP-dependent RNA helicase DDX18	61.594	546	1.451	1.3088	3	NA	NA	1	8.6	2.6	4	1	165450000	113220000	29069000	53498000
YY1;YY2	>sp|P25490|TYY1_HUMAN Transcriptional repressor protein YY1 OS=Homo sapiens GN=YY1 PE=1 SV=2;>tr|H0YJV7|H0YJV7_HUMAN Transcriptional repressor protein YY1 (Fragment) OS=Homo sapiens GN=YY1 PE=1 SV=1;>sp|O15391|TYY2_HUMAN Transcription factor YY2 OS=Homo sa	Transcriptional repressor protein YY1;Transcription factor YY2	44.712	414	1.328	1.3059	8	0.50417	0.77388	4	16.4	15.5	7	5	415640000	294780000	162240000	350140000
RBM27;POU4F3	>sp|Q9P2N5|RBM27_HUMAN RNA-binding protein 27 OS=Homo sapiens GN=RBM27 PE=1 SV=2;>tr|U3KPZ7|U3KPZ7_HUMAN RNA-binding protein 27 OS=Homo sapiens GN=RBM27 PE=4 SV=1;>tr|D3DQF6|D3DQF6_HUMAN POU domain, class 4, transcription factor 3, isoform CRA_a OS=Homo sa	RNA-binding protein 27	118.72	1060	1.2578	1.304	33	0.62296	1.0282	24	28.6	25.9	25	24	3109400000	2307400000	1088800000	1740800000
ZNF280C	>sp|Q8ND82|Z280C_HUMAN Zinc finger protein 280C OS=Homo sapiens GN=ZNF280C PE=1 SV=1;>tr|Q9UJJ2|Q9UJJ2_HUMAN Zinc finger protein 280C (Fragment) OS=Homo sapiens GN=ZNF280C PE=1 SV=1	Zinc finger protein 280C	83.095	737	1.3795	1.3026	15	0.40888	0.65334	13	19.5	20.5	13	14	496480000	384110000	232010000	527810000
CSA2;IK	>tr|Q9UK43|Q9UK43_HUMAN Chondrosarcoma-associated protein 2 OS=Homo sapiens GN=CSA2 PE=2 SV=1;>tr|Q95HA6|Q95HA6_HUMAN IK cytokine, down-regulator of HLA II OS=Homo sapiens GN=IK PE=2 SV=1;>tr|B2R5Y4|B2R5Y4_HUMAN cDNA, FLJ92684, highly similar to Homo sapie	Protein Red	65.585	557	1.2592	1.3005	14	0.57604	0.88908	7	30.5	15.4	14	7	1023600000	748200000	251320000	404370000
XRN2	>tr|B3KMC9|B3KMC9_HUMAN cDNA FLJ10711 fis, clone NT2RP3000917, highly similar to 5-3 exoribonuclease 2 (EC 3.1.11.-) OS=Homo sapiens PE=2 SV=1;>sp|Q9H0D6|XRN2_HUMAN 5-3 exoribonuclease 2 OS=Homo sapiens GN=XRN2 PE=1 SV=1;>tr|B4E0B9|B4E0B9_HUMAN cDNA FL	5-3 exoribonuclease 2	108.61	950	1.2022	1.2963	6	0.50778	0.83512	4	13.6	4.8	11	4	194630000	172810000	63579000	81544000
VDAC3	>tr|E5RFP6|E5RFP6_HUMAN Voltage-dependent anion-selective channel protein 3 OS=Homo sapiens GN=VDAC3 PE=1 SV=1;>tr|E5RJN6|E5RJN6_HUMAN Voltage-dependent anion-selective channel protein 3 (Fragment) OS=Homo sapiens GN=VDAC3 PE=1 SV=3;>tr|E5RHZ6|E5RHZ6_HUMAN	Voltage-dependent anion-selective channel protein 3	14.672	134	1.438	1.2945	2	NA	NA	1	15.7	8.2	2	1	70579000	50411000	31301000	33289000
DACH1	>tr|A0A087WZP2|A0A087WZP2_HUMAN Dachshund homolog 1 OS=Homo sapiens GN=DACH1 PE=4 SV=1;>sp|Q9UI36-2|DACH1_HUMAN Isoform 2 of Dachshund homolog 1 OS=Homo sapiens GN=DACH1;>sp|Q9UI36|DACH1_HUMAN Dachshund homolog 1 OS=Homo sapiens GN=DACH1 PE=1 SV=3;>tr|A0A0	Dachshund homolog 1	78.561	758	1.3379	1.2934	9	0.48544	0.80816	4	12.9	5.4	8	3	375250000	305810000	148570000	266890000
hCG_36935;ZNF131	>tr|B3KQ42|B3KQ42_HUMAN cDNA FLJ32781 fis, clone TESTI2002149, highly similar to ZINC FINGER PROTEIN 131 OS=Homo sapiens PE=2 SV=1;>tr|A0A024R087|A0A024R087_HUMAN HCG36935, isoform CRA_b OS=Homo sapiens GN=hCG_36935 PE=4 SV=1;>sp|P52739-2|ZN131_HUMAN Isofo	Zinc finger protein 131	67.32	589	1.2563	1.2894	3	0.44451	0.70251	2	9	1.9	4	1	120090000	91482000	18159000	36328000
WBP11	>tr|B4DMD3|B4DMD3_HUMAN cDNA FLJ58174, highly similar to WW domain-binding protein 11 OS=Homo sapiens PE=2 SV=1;>tr|B4DY34|B4DY34_HUMAN cDNA FLJ60194, highly similar to WW domain-binding protein 11 OS=Homo sapiens PE=2 SV=1;>tr|A0A024RAW9|A0A024RAW9_HUMAN	WW domain-binding protein 11	64.907	589	1.3376	1.2854	7	0.42122	0.66048	6	13.6	15.3	8	7	280640000	220390000	141330000	300670000
SART1	>sp|O43290|SNUT1_HUMAN U4/U6.U5 tri-snRNP-associated protein 1 OS=Homo sapiens GN=SART1 PE=1 SV=1;>tr|B4DDH9|B4DDH9_HUMAN cDNA FLJ53820, highly similar to U4/U6.U5 tri-snRNP-associated protein 1 OS=Homo sapiens PE=2 SV=1	U4/U6.U5 tri-snRNP-associated protein 1	90.254	800	1.2099	1.2839	32	0.61878	0.97964	32	40.5	42.6	31	31	3316600000	2579900000	1979900000	3193000000
NFRKB	>tr|A0A024R3K9|A0A024R3K9_HUMAN Nuclear factor related to kappaB binding protein, isoform CRA_c OS=Homo sapiens GN=NFRKB PE=4 SV=1;>tr|A0A024R3N2|A0A024R3N2_HUMAN Nuclear factor related to kappaB binding protein, isoform CRA_a OS=Homo sapiens GN=NFRKB PE=4	Nuclear factor related to kappa-B-binding protein	139	1299	1.337	1.2782	4	0.5137	0.80023	3	3.7	3.2	4	3	46292000	37319000	15492000	36406000
ARID4B;ARID4A	>tr|X6RCR8|X6RCR8_HUMAN AT-rich interactive domain-containing protein 4B (Fragment) OS=Homo sapiens GN=ARID4B PE=1 SV=1;>tr|A0A024R3R1|A0A024R3R1_HUMAN AT rich interactive domain 4B (RBP1-like), isoform CRA_d OS=Homo sapiens GN=ARID4B PE=4 SV=1;>sp|Q4LE39-	AT-rich interactive domain-containing protein 4B;AT-rich interactive domain-containing protein 4A	55.308	483	1.345	1.2761	2	NA	NA	1	4.8	2.1	2	1	23964000	16843000	6431900	12711000
XRCC1;FOXH1	>tr|A0A024R0S8|A0A024R0S8_HUMAN X-ray repair complementing defective repair in Chinese hamster cells 1, isoform CRA_b OS=Homo sapiens GN=XRCC1 PE=4 SV=1;>tr|Q59HH7|Q59HH7_HUMAN X-ray repair cross complementing protein 1 variant (Fragment) OS=Homo sapiens P	DNA repair protein XRCC1	69.525	633	1.3387	1.2753	8	0.39949	0.64946	7	16.1	13.4	8	7	333010000	282880000	129420000	293800000
ORC2L;ORC2	>tr|A0A024R411|A0A024R411_HUMAN Origin recognition complex, subunit 2-like (Yeast), isoform CRA_a OS=Homo sapiens GN=ORC2L PE=4 SV=1;>sp|Q13416|ORC2_HUMAN Origin recognition complex subunit 2 OS=Homo sapiens GN=ORC2 PE=1 SV=2;>tr|B4DYU9|B4DYU9_HUMAN cDNA F	Origin recognition complex subunit 2	65.971	577	1.2375	1.2751	33	0.51793	0.83756	30	45.9	42.8	25	23	4639800000	3593500000	2180900000	3867900000
PHF3	>sp|Q92576-2|PHF3_HUMAN Isoform 2 of PHD finger protein 3 OS=Homo sapiens GN=PHF3;>sp|Q92576|PHF3_HUMAN PHD finger protein 3 OS=Homo sapiens GN=PHF3 PE=1 SV=3;>tr|E7EVH3|E7EVH3_HUMAN PHD finger protein 3 (Fragment) OS=Homo sapiens GN=PHF3 PE=1 SV=1;>tr|E9P	PHD finger protein 3	219.81	1951	1.2761	1.2738	22	0.49972	0.80915	21	15.6	16.5	26	26	768660000	855240000	800240000	1005400000
NOL11	>sp|Q9H8H0|NOL11_HUMAN Nucleolar protein 11 OS=Homo sapiens GN=NOL11 PE=1 SV=1;>tr|J3QR28|J3QR28_HUMAN Nucleolar protein 11 (Fragment) OS=Homo sapiens GN=NOL11 PE=1 SV=1	Nucleolar protein 11	81.123	719	1.3139	1.2725	2	NA	NA	0	5.7	0	2	0	45430000	23681000	0	0
CCDC86	>sp|Q9H6F5|CCD86_HUMAN Coiled-coil domain-containing protein 86 OS=Homo sapiens GN=CCDC86 PE=1 SV=1;>sp|Q9H6F5-2|CCD86_HUMAN Isoform 2 of Coiled-coil domain-containing protein 86 OS=Homo sapiens GN=CCDC86	Coiled-coil domain-containing protein 86	40.235	360	1.2517	1.2704	2	0.54627	0.88521	3	4.7	10	2	3	82896000	67242000	26727000	52221000
TBL3	>sp|Q12788|TBL3_HUMAN Transducin beta-like protein 3 OS=Homo sapiens GN=TBL3 PE=1 SV=2;>tr|A0A087WYP7|A0A087WYP7_HUMAN Transducin beta-like protein 3 OS=Homo sapiens GN=TBL3 PE=4 SV=1;>tr|J3KNP2|J3KNP2_HUMAN Transducin beta-like protein 3 (Fragment) OS=Hom	Transducin beta-like protein 3	89.034	808	1.2502	1.2695	4	0.62605	0.99402	3	8.4	4.7	5	3	74981000	56997000	29123000	59967000
PINX1	>sp|Q96BK5|PINX1_HUMAN PIN2/TERF1-interacting telomerase inhibitor 1 OS=Homo sapiens GN=PINX1 PE=1 SV=2	PIN2/TERF1-interacting telomerase inhibitor 1	37.034	328	1.429	1.2677	5	0.41353	0.6579	7	17.7	27.4	4	7	157410000	98351000	144760000	317290000
CCNK	>tr|G3V5E1|G3V5E1_HUMAN Cyclin-K OS=Homo sapiens GN=CCNK PE=1 SV=1;>tr|A0A024R6K1|A0A024R6K1_HUMAN Cyclin K, isoform CRA_c OS=Homo sapiens GN=CCNK PE=3 SV=1;>sp|O75909-1|CCNK_HUMAN Isoform 3 of Cyclin-K OS=Homo sapiens GN=CCNK;>sp|O75909|CCNK_HUMAN Cyclin-	Cyclin-K	43.404	378	1.3743	1.2677	6	0.63872	1.0798	7	18.8	30.2	6	8	336280000	276770000	163790000	237410000
PPP1R10	>tr|Q2L6I0|Q2L6I0_HUMAN FB19 protein OS=Homo sapiens GN=PPP1R10 PE=2 SV=1;>sp|Q96QC0|PP1RA_HUMAN Serine/threonine-protein phosphatase 1 regulatory subunit 10 OS=Homo sapiens GN=PPP1R10 PE=1 SV=1	Serine/threonine-protein phosphatase 1 regulatory subunit 10	99.057	940	1.172	1.2663	33	0.44833	0.7493	28	30.2	29.8	24	23	3046400000	2382400000	1389200000	2545700000
DNAJC8	>sp|O75937|DNJC8_HUMAN DnaJ homolog subfamily C member 8 OS=Homo sapiens GN=DNAJC8 PE=1 SV=2	DnaJ homolog subfamily C member 8	29.841	253	1.4241	1.2647	5	0.65351	1.0287	3	22.1	19.4	6	5	198110000	163140000	104300000	137060000
ZMYND8;DKFZp564P1772	>sp|Q9ULU4-12|PKCB1_HUMAN Isoform 12 of Protein kinase C-binding protein 1 OS=Homo sapiens GN=ZMYND8;>sp|Q9ULU4-21|PKCB1_HUMAN Isoform 21 of Protein kinase C-binding protein 1 OS=Homo sapiens GN=ZMYND8;>sp|Q9ULU4-14|PKCB1_HUMAN Isoform 14 of Protein kinase	Protein kinase C-binding protein 1	128.37	1160	1.3084	1.2565	20	0.40125	0.63035	15	20.9	22.2	20	20	828410000	540880000	588500000	936340000
MLLT1	>sp|Q03111|ENL_HUMAN Protein ENL OS=Homo sapiens GN=MLLT1 PE=1 SV=2	Protein ENL	62.055	559	1.4143	1.2555	3	0.47503	0.76179	4	4.3	4.3	2	2	50149000	37436000	34935000	74521000
ZC3H13	>sp|Q5T200-2|ZC3HD_HUMAN Isoform 2 of Zinc finger CCCH domain-containing protein 13 OS=Homo sapiens GN=ZC3H13;>sp|Q5T200|ZC3HD_HUMAN Zinc finger CCCH domain-containing protein 13 OS=Homo sapiens GN=ZC3H13 PE=1 SV=1	Zinc finger CCCH domain-containing protein 13	184.87	1564	1.2251	1.2528	5	0.5515	0.91457	5	3.9	3.6	6	5	96995000	80972000	48896000	84445000
EEF1D	>tr|E9PK01|E9PK01_HUMAN Elongation factor 1-delta (Fragment) OS=Homo sapiens GN=EEF1D PE=1 SV=1;>sp|P29692|EF1D_HUMAN Elongation factor 1-delta OS=Homo sapiens GN=EEF1D PE=1 SV=5;>tr|A0A087X1X7|A0A087X1X7_HUMAN Elongation factor 1-delta OS=Homo sapiens GN=	Elongation factor 1-delta	28.821	261	1.233	1.2527	3	0.64874	1.0389	3	12.6	30.7	3	6	127970000	108860000	118030000	183650000
GTF2F2	>tr|A0A024RDU9|A0A024RDU9_HUMAN General transcription factor IIF, polypeptide 2, 30kDa, isoform CRA_c OS=Homo sapiens GN=GTF2F2 PE=4 SV=1;>sp|P13984|T2FB_HUMAN General transcription factor IIF subunit 2 OS=Homo sapiens GN=GTF2F2 PE=1 SV=2	General transcription factor IIF subunit 2	28.38	249	1.3487	1.2521	7	0.89856	1.4372	3	36.9	24.5	10	5	431160000	346120000	123070000	197640000
NIFK	>sp|Q9BYG3|MK67I_HUMAN MKI67 FHA domain-interacting nucleolar phosphoprotein OS=Homo sapiens GN=NIFK PE=1 SV=1;>tr|C9J808|C9J808_HUMAN MKI67 FHA domain-interacting nucleolar phosphoprotein (Fragment) OS=Homo sapiens GN=NIFK PE=1 SV=3	MKI67 FHA domain-interacting nucleolar phosphoprotein	34.222	293	1.3158	1.2498	6	0.51079	0.81624	3	37.2	24.9	8	5	180720000	129030000	70671000	156960000
CHCHD3	>tr|A4D1N4|A4D1N4_HUMAN Coiled-coil-helix-coiled-coil-helix domain containing 3 OS=Homo sapiens GN=CHCHD3 PE=4 SV=1;>tr|C9JRZ6|C9JRZ6_HUMAN MICOS complex subunit MIC19 OS=Homo sapiens GN=CHCHD3 PE=1 SV=1;>sp|Q9NX63|MIC19_HUMAN MICOS complex subunit MIC19 O	MICOS complex subunit MIC19	26.152	227	1.2171	1.2497	4	0.60396	0.99396	5	14.1	19.8	3	4	100960000	77203000	78701000	131440000
HOXA13;HOXC13;NUP98/HOXC13	>tr|Q6DI00|Q6DI00_HUMAN Homeobox A13 OS=Homo sapiens GN=HOXA13 PE=2 SV=1;>sp|P31271|HXA13_HUMAN Homeobox protein Hox-A13 OS=Homo sapiens GN=HOXA13 PE=1 SV=3;>tr|Q6LAM3|Q6LAM3_HUMAN HOXC13 protein (Fragment) OS=Homo sapiens GN=HOXC13 PE=2 SV=1;>tr|Q86TI1|Q8	Homeobox protein Hox-A13;Homeobox protein Hox-C13	39.768	388	1.2249	1.2485	3	0.54616	0.85307	3	8.8	6.4	2	2	124320000	94515000	96101000	210150000
ANLN	>tr|A8K5D9|A8K5D9_HUMAN cDNA FLJ77424, highly similar to Homo sapiens anillin, actin binding protein (scraps homolog, Drosophila), mRNA OS=Homo sapiens PE=2 SV=1;>tr|A0A024RA49|A0A024RA49_HUMAN Anillin, actin binding protein (Scraps homolog, Drosophila), i	Actin-binding protein anillin	119.9	1086	1.43	1.2465	6	0.4283	0.67565	4	8.9	8.3	8	7	179680000	116650000	85724000	201600000
WHSC1	>sp|O96028-5|NSD2_HUMAN Isoform 5 of Histone-lysine N-methyltransferase NSD2 OS=Homo sapiens GN=WHSC1;>sp|O96028-3|NSD2_HUMAN Isoform 3 of Histone-lysine N-methyltransferase NSD2 OS=Homo sapiens GN=WHSC1;>sp|O96028|NSD2_HUMAN Histone-lysine N-methyltransfe	Histone-lysine N-methyltransferase NSD2	69.397	629	1.3423	1.241	5	NA	NA	1	11.1	2.5	5	1	80368000	59075000	14926000	23338000
RSBN1	>tr|A0A087WWP8|A0A087WWP8_HUMAN Round spermatid basic protein 1 OS=Homo sapiens GN=RSBN1 PE=1 SV=1;>sp|Q5VWQ0|RSBN1_HUMAN Round spermatid basic protein 1 OS=Homo sapiens GN=RSBN1 PE=1 SV=2;>sp|Q5VWQ0-4|RSBN1_HUMAN Isoform 4 of Round spermatid basic protein	Round spermatid basic protein 1	84.975	754	1.207	1.2377	4	0.51567	0.8154	2	8.8	7.3	4	2	115760000	92926000	20125000	42351000
DGCR8	>tr|Q53GY5|Q53GY5_HUMAN DiGeorge syndrome critical region gene 8 variant (Fragment) OS=Homo sapiens PE=2 SV=1;>sp|Q8WYQ5-3|DGCR8_HUMAN Isoform 3 of Microprocessor complex subunit DGCR8 OS=Homo sapiens GN=DGCR8;>sp|Q8WYQ5|DGCR8_HUMAN Microprocessor complex	Microprocessor complex subunit DGCR8	64.486	570	1.3709	1.2357	2	0.73039	1.1554	2	3.9	3.9	2	2	19303000	11978000	26638000	25351000
LIG3	>tr|E5KLB5|E5KLB5_HUMAN DNA ligase OS=Homo sapiens PE=3 SV=1;>sp|P49916|DNLI3_HUMAN DNA ligase 3 OS=Homo sapiens GN=LIG3 PE=1 SV=2;>tr|E5KLB6|E5KLB6_HUMAN DNA ligase OS=Homo sapiens GN=LIG3 PE=3 SV=1;>sp|P49916-2|DNLI3_HUMAN Isoform Beta of DNA ligase 3 OS	DNA ligase;DNA ligase 3	112.91	1009	1.2241	1.2349	16	0.48369	0.74999	18	18.2	23.5	17	23	809370000	614730000	534340000	996640000
NKRF;NRF	>tr|Q6NUN2|Q6NUN2_HUMAN NFKB repressing factor OS=Homo sapiens GN=NKRF PE=2 SV=1;>tr|A3F769|A3F769_HUMAN NF-kappaB repressing factor OS=Homo sapiens GN=NRF PE=2 SV=1;>tr|A3F768|A3F768_HUMAN NF-kappaB repressing factor OS=Homo sapiens GN=NRF PE=2 SV=1;>sp|O	NF-kappa-B-repressing factor	77.703	690	1.2921	1.2346	6	0.4618	0.63314	3	13	4.6	8	3	159840000	101090000	10243000	21618000
C1orf174	>sp|Q8IYL3|CA174_HUMAN UPF0688 protein C1orf174 OS=Homo sapiens GN=C1orf174 PE=1 SV=2	UPF0688 protein C1orf174	25.977	243	1.3738	1.2336	3	0.56235	0.85831	2	13.2	13.2	2	2	42790000	31801000	32781000	44000000
EMSY;C11orf30	>sp|Q7Z589-2|EMSY_HUMAN Isoform 2 of Protein EMSY OS=Homo sapiens GN=EMSY;>sp|Q7Z589|EMSY_HUMAN Protein EMSY OS=Homo sapiens GN=EMSY PE=1 SV=2;>sp|Q7Z589-5|EMSY_HUMAN Isoform 5 of Protein EMSY OS=Homo sapiens GN=EMSY;>sp|Q7Z589-7|EMSY_HUMAN Isoform 7 of Pr	Protein EMSY	123.91	1155	1.1442	1.2325	19	0.56267	0.87865	16	25.1	19	24	19	1163600000	691090000	312290000	554140000
WDR36	>tr|A0A0A0MTB8|A0A0A0MTB8_HUMAN WD repeat-containing protein 36 OS=Homo sapiens GN=WDR36 PE=4 SV=1;>sp|Q8NI36|WDR36_HUMAN WD repeat-containing protein 36 OS=Homo sapiens GN=WDR36 PE=1 SV=1	WD repeat-containing protein 36	99.365	895	1.373	1.227	4	0.35041	0.57651	3	5.7	4.1	4	3	62885000	50399000	25911000	62724000
CBX8	>sp|Q9HC52|CBX8_HUMAN Chromobox protein homolog 8 OS=Homo sapiens GN=CBX8 PE=1 SV=3	Chromobox protein homolog 8	43.395	389	1.2618	1.2261	4	0.61798	1.0127	5	16.7	15.2	5	6	133810000	105720000	105270000	150260000
SLC25A5;SLC25A4	>tr|Q6NVC0|Q6NVC0_HUMAN SLC25A5 protein (Fragment) OS=Homo sapiens GN=SLC25A5 PE=2 SV=1;>sp|P05141|ADT2_HUMAN ADP/ATP translocase 2 OS=Homo sapiens GN=SLC25A5 PE=1 SV=7;>tr|Q59EI9|Q59EI9_HUMAN ADP,ATP carrier protein, liver isoform T2 variant (Fragment) OS	ADP/ATP translocase 2;ADP/ATP translocase 2, N-terminally processed;ADP/ATP translocase 1	35.293	323	1.2779	1.2243	7	0.63085	1.0068	9	20.1	27.6	1	3	660990000	547630000	561780000	874710000
CUX1	>sp|P39880-3|CUX1_HUMAN Isoform 3 of Homeobox protein cut-like 1 OS=Homo sapiens GN=CUX1;>sp|P39880|CUX1_HUMAN Homeobox protein cut-like 1 OS=Homo sapiens GN=CUX1 PE=1 SV=3;>sp|P39880-2|CUX1_HUMAN Isoform 2 of Homeobox protein cut-like 1 OS=Homo sapiens GN	Homeobox protein cut-like 1	165.69	1516	1.2146	1.219	29	0.54925	0.9228	22	24.2	23.3	29	27	996480000	783890000	563310000	1019300000
NR2C1	>tr|H9NIM2|H9NIM2_HUMAN Nuclear receptor subfamily 2, group C, member 1, isoform CRA_c OS=Homo sapiens GN=NR2C1 PE=2 SV=1;>sp|P13056|NR2C1_HUMAN Nuclear receptor subfamily 2 group C member 1 OS=Homo sapiens GN=NR2C1 PE=1 SV=2;>tr|B6ZGT7|B6ZGT7_HUMAN Nuclea	Nuclear receptor subfamily 2 group C member 1	67.314	603	1.303	1.2189	3	0.49084	0.75973	2	8.5	3.5	4	2	53179000	40108000	11349000	20092000
RBM26	>sp|Q5T8P6-2|RBM26_HUMAN Isoform 2 of RNA-binding protein 26 OS=Homo sapiens GN=RBM26;>sp|Q5T8P6|RBM26_HUMAN RNA-binding protein 26 OS=Homo sapiens GN=RBM26 PE=1 SV=3	RNA-binding protein 26	111.02	983	1.1974	1.2184	31	0.65954	0.98976	24	25	24.1	1	1	2792000000	2169900000	1667400000	2529100000
SLU7	>tr|B2RBA0|B2RBA0_HUMAN cDNA, FLJ95388, highly similar to Homo sapiens step II splicing factor SLU7 (SLU7), mRNA OS=Homo sapiens PE=2 SV=1;>sp|O95391|SLU7_HUMAN Pre-mRNA-splicing factor SLU7 OS=Homo sapiens GN=SLU7 PE=1 SV=2	Pre-mRNA-splicing factor SLU7	68.356	586	1.3173	1.2173	5	0.54625	0.89069	5	10.6	12.5	5	6	127550000	100240000	80251000	144580000
SPEN	>sp|Q96T58|MINT_HUMAN Msx2-interacting protein OS=Homo sapiens GN=SPEN PE=1 SV=1	Msx2-interacting protein	402.24	3664	1.1877	1.217	66	0.5804	0.93041	70	20.9	23.3	64	70	2925900000	2062800000	1801500000	3108500000
TCF20	>tr|W5ZR30|W5ZR30_HUMAN Transcription factor 20 OS=Homo sapiens GN=TCF20 PE=2 SV=1;>sp|Q9UGU0|TCF20_HUMAN Transcription factor 20 OS=Homo sapiens GN=TCF20 PE=1 SV=3;>sp|Q9UGU0-2|TCF20_HUMAN Isoform 2 of Transcription factor 20 OS=Homo sapiens GN=TCF20	Transcription factor 20	211.77	1960	1.2535	1.2151	22	0.44102	0.71012	21	16.9	21	24	27	733950000	625990000	549380000	1086800000
RANGAP1	>tr|A0A024R1U0|A0A024R1U0_HUMAN Ran GTPase activating protein 1, isoform CRA_d OS=Homo sapiens GN=RANGAP1 PE=4 SV=1;>sp|P46060|RAGP1_HUMAN Ran GTPase-activating protein 1 OS=Homo sapiens GN=RANGAP1 PE=1 SV=1;>tr|B4DY16|B4DY16_HUMAN cDNA FLJ51385, highly si	Ran GTPase-activating protein 1	63.541	587	1.1973	1.2129	9	0.75579	1.2685	8	21.6	20.3	10	9	343030000	277850000	218150000	273750000
RBM11	>sp|P57052|RBM11_HUMAN Splicing regulator RBM11 OS=Homo sapiens GN=RBM11 PE=1 SV=1	Splicing regulator RBM11	32.179	281	1.177	1.2127	11	0.52303	0.78211	6	33.5	33.5	9	8	588290000	495630000	340430000	467000000
QSER1	>sp|Q2KHR3-2|QSER1_HUMAN Isoform 2 of Glutamine and serine-rich protein 1 OS=Homo sapiens GN=QSER1;>sp|Q2KHR3|QSER1_HUMAN Glutamine and serine-rich protein 1 OS=Homo sapiens GN=QSER1 PE=1 SV=3	Glutamine and serine-rich protein 1	168	1529	1.2761	1.2123	4	0.62151	1.0588	4	3.8	4.5	4	5	64802000	50140000	73546000	96497000
TADA3L;TADA3	>tr|A0A024R2D7|A0A024R2D7_HUMAN Transcriptional adaptor 3 (NGG1 homolog, yeast)-like, isoform CRA_a OS=Homo sapiens GN=TADA3L PE=4 SV=1;>sp|O75528-2|TADA3_HUMAN Isoform 2 of Transcriptional adapter 3 OS=Homo sapiens GN=TADA3;>sp|O75528|TADA3_HUMAN Transcri	Transcriptional adapter 3	41.392	369	1.2699	1.21	2	NA	NA	0	4.9	3	2	1	44532000	37939000	0	0
EXOSC10	>sp|Q01780|EXOSX_HUMAN Exosome component 10 OS=Homo sapiens GN=EXOSC10 PE=1 SV=2;>sp|Q01780-2|EXOSX_HUMAN Isoform 2 of Exosome component 10 OS=Homo sapiens GN=EXOSC10;>tr|B4DFE4|B4DFE4_HUMAN cDNA FLJ59618, highly similar to Exosome component 10 OS=Homo sap	Exosome component 10	100.83	885	1.2374	1.2093	19	0.58097	0.93699	18	30.7	29.2	23	23	1213700000	967960000	1540900000	837710000
NOL7	>tr|A0A024QZW2|A0A024QZW2_HUMAN Nucleolar protein 7, 27kDa, isoform CRA_a OS=Homo sapiens GN=NOL7 PE=4 SV=1;>sp|Q9UMY1|NOL7_HUMAN Nucleolar protein 7 OS=Homo sapiens GN=NOL7 PE=1 SV=2;>tr|H7C2B1|H7C2B1_HUMAN Nucleolar protein 7 (Fragment) OS=Homo sapiens G	Nucleolar protein 7	29.426	257	1.3864	1.2067	2	NA	NA	0	9.3	0	2	0	46259000	28514000	0	0
ATF7IP	>tr|A0A024RAY1|A0A024RAY1_HUMAN Activating transcription factor 7 interacting protein, isoform CRA_a OS=Homo sapiens GN=ATF7IP PE=4 SV=1;>sp|Q6VMQ6-2|MCAF1_HUMAN Isoform 2 of Activating transcription factor 7-interacting protein 1 OS=Homo sapiens GN=ATF7IP	Activating transcription factor 7-interacting protein 1	136.39	1270	1.2921	1.2024	3	0.44658	0.70305	5	3.1	5.1	3	5	98131000	68515000	138450000	201290000
CHD4	>tr|F5GWX5|F5GWX5_HUMAN Chromodomain-helicase-DNA-binding protein 4 OS=Homo sapiens GN=CHD4 PE=1 SV=1;>sp|Q14839|CHD4_HUMAN Chromodomain-helicase-DNA-binding protein 4 OS=Homo sapiens GN=CHD4 PE=1 SV=2;>sp|Q14839-2|CHD4_HUMAN Isoform 2 of Chromodomain-heli	Chromodomain-helicase-DNA-binding protein 4	217.1	1905	1.1862	1.2021	71	0.59507	0.95026	59	35.1	33.4	41	35	5066300000	4390800000	2828100000	4423500000
BRD2	>tr|X5CF57|X5CF57_HUMAN BRD2 OS=Homo sapiens GN=BRD2 PE=4 SV=1;>tr|A0A024RCR5|A0A024RCR5_HUMAN Bromodomain containing 2, isoform CRA_b OS=Homo sapiens GN=BRD2 PE=4 SV=1;>tr|H0Y6K2|H0Y6K2_HUMAN Bromodomain-containing protein 2 (Fragment) OS=Homo sapiens GN=	Bromodomain-containing protein 2	83.15	754	1.2476	1.2009	6	0.50122	0.82352	12	11.5	22.3	6	11	161530000	117800000	205240000	313740000
NDUFS8	>tr|A0A024R5K3|A0A024R5K3_HUMAN NADH dehydrogenase (Ubiquinone) Fe-S protein 8, 23kDa (NADH-coenzyme Q reductase), isoform CRA_b OS=Homo sapiens GN=NDUFS8 PE=3 SV=1;>tr|E9PPW7|E9PPW7_HUMAN NADH dehydrogenase [ubiquinone] iron-sulfur protein 8, mitochondria	NADH dehydrogenase [ubiquinone] iron-sulfur protein 8, mitochondrial	19.213	172	1.2376	1.1995	3	0.61814	1.0207	4	16.9	33.7	3	5	78266000	72175000	86413000	155090000
DDX42	>sp|Q86XP3|DDX42_HUMAN ATP-dependent RNA helicase DDX42 OS=Homo sapiens GN=DDX42 PE=1 SV=1;>sp|Q86XP3-2|DDX42_HUMAN Isoform 2 of ATP-dependent RNA helicase DDX42 OS=Homo sapiens GN=DDX42;>tr|A0A0A0MSJ0|A0A0A0MSJ0_HUMAN ATP-dependent RNA helicase DDX42 OS=H	ATP-dependent RNA helicase DDX42	102.97	938	1.2388	1.1989	23	0.41779	0.701	19	30.4	33.4	24	24	1001200000	823390000	656010000	1332400000
MRE11A	>tr|A0A024R395|A0A024R395_HUMAN MRE11 meiotic recombination 11 homolog A (S. cerevisiae), isoform CRA_a OS=Homo sapiens GN=MRE11A PE=3 SV=1;>sp|P49959|MRE11_HUMAN Double-strand break repair protein MRE11A OS=Homo sapiens GN=MRE11A PE=1 SV=3;>sp|P49959-3|MR	Double-strand break repair protein MRE11A	80.592	708	1.1592	1.1986	17	0.59646	0.94121	20	40	37.9	21	20	1455800000	1206300000	769580000	1319300000
ILKAP;ILKAP3	>sp|Q9H0C8|ILKAP_HUMAN Integrin-linked kinase-associated serine/threonine phosphatase 2C OS=Homo sapiens GN=ILKAP PE=1 SV=1;>tr|F8SNU7|F8SNU7_HUMAN Integrin-linked kinase associated phosphatase OS=Homo sapiens GN=ILKAP3 PE=1 SV=1;>tr|H7C2I8|H7C2I8_HUMAN In	Integrin-linked kinase-associated serine/threonine phosphatase 2C	42.906	392	1.2203	1.1957	4	0.64191	1.0651	3	15.3	10.7	5	4	168210000	107330000	71913000	113620000
FNBP4	>tr|D3DQS4|D3DQS4_HUMAN Formin binding protein 4, isoform CRA_d OS=Homo sapiens GN=FNBP4 PE=4 SV=1;>sp|Q8N3X1|FNBP4_HUMAN Formin-binding protein 4 OS=Homo sapiens GN=FNBP4 PE=1 SV=3;>sp|Q8N3X1-2|FNBP4_HUMAN Isoform 2 of Formin-binding protein 4 OS=Homo sap	Formin-binding protein 4	110.25	1017	1.1974	1.1935	4	0.57468	0.91416	7	7	10.8	6	9	287020000	299060000	174430000	427290000
TRIM33	>tr|H0Y612|H0Y612_HUMAN E3 ubiquitin-protein ligase TRIM33 (Fragment) OS=Homo sapiens GN=TRIM33 PE=1 SV=1;>tr|E7EN20|E7EN20_HUMAN E3 ubiquitin-protein ligase TRIM33 OS=Homo sapiens GN=TRIM33 PE=1 SV=2;>tr|A0A024R0F6|A0A024R0F6_HUMAN Tripartite motif-contai	E3 ubiquitin-protein ligase TRIM33	98.891	888	1.2619	1.1897	4	0.67954	1.1098	3	5.3	4.1	4	3	89083000	70118000	35086000	59740000
DKFZp686E2459;RBM10	>tr|Q7Z3D7|Q7Z3D7_HUMAN Putative uncharacterized protein DKFZp686E2459 OS=Homo sapiens GN=DKFZp686E2459 PE=2 SV=1;>tr|A0A0A0MR66|A0A0A0MR66_HUMAN RNA binding motif protein 10, isoform CRA_d OS=Homo sapiens GN=RBM10 PE=4 SV=1;>sp|P98175-2|RBM10_HUMAN Isofor	RNA-binding protein 10	110.34	995	1.2086	1.1861	26	0.68422	1.0574	21	26.6	25.2	20	20	2151600000	1808800000	1518500000	2199000000
RBBP6	>sp|Q7Z6E9-2|RBBP6_HUMAN Isoform 2 of E3 ubiquitin-protein ligase RBBP6 OS=Homo sapiens GN=RBBP6;>sp|Q7Z6E9|RBBP6_HUMAN E3 ubiquitin-protein ligase RBBP6 OS=Homo sapiens GN=RBBP6 PE=1 SV=1;>sp|Q7Z6E9-4|RBBP6_HUMAN Isoform 4 of E3 ubiquitin-protein ligase R	E3 ubiquitin-protein ligase RBBP6	197.29	1758	1.1492	1.1851	30	0.59012	0.93923	29	16.4	17	28	28	1193100000	969410000	821320000	1237300000
DKFZp761H087;CYFIP2;CYFIP1	>tr|A0A087X0D6|A0A087X0D6_HUMAN Cytoplasmic FMR1-interacting protein 2 OS=Homo sapiens GN=CYFIP2 PE=1 SV=1;>tr|Q14650|Q14650_HUMAN Inducible protein OS=Homo sapiens PE=2 SV=1;>tr|Q9NSN1|Q9NSN1_HUMAN Putative uncharacterized protein DKFZp761H087 (Fragment)	Cytoplasmic FMR1-interacting protein 2;Cytoplasmic FMR1-interacting protein 1	27.402	234	1.1743	1.1849	2	NA	NA	1	6.4	3	2	1	71134000	69269000	29336000	35901000
ZMYM4	>tr|H7C1I7|H7C1I7_HUMAN Zinc finger MYM-type protein 4 (Fragment) OS=Homo sapiens GN=ZMYM4 PE=1 SV=1;>sp|Q5VZL5-3|ZMYM4_HUMAN Isoform 3 of Zinc finger MYM-type protein 4 OS=Homo sapiens GN=ZMYM4;>sp|Q5VZL5-2|ZMYM4_HUMAN Isoform 2 of Zinc finger MYM-type pr	Zinc finger MYM-type protein 4	134.31	1207	1.263	1.1845	2	NA	NA	1	1.7	0.8	2	1	36951000	25462000	7920100	13579000
SAP130	>tr|H7BXF5|H7BXF5_HUMAN Histone deacetylase complex subunit SAP130 OS=Homo sapiens GN=SAP130 PE=1 SV=1;>sp|Q9H0E3|SP130_HUMAN Histone deacetylase complex subunit SAP130 OS=Homo sapiens GN=SAP130 PE=1 SV=1;>sp|Q9H0E3-3|SP130_HUMAN Isoform 3 of Histone deace	Histone deacetylase complex subunit SAP130	111.28	1056	1.1655	1.1841	6	0.51574	0.82396	5	8	8	7	7	279670000	257370000	143030000	256970000
UQCRC2	>tr|H3BRG4|H3BRG4_HUMAN Cytochrome b-c1 complex subunit 2, mitochondrial OS=Homo sapiens GN=UQCRC2 PE=1 SV=1;>sp|P22695|QCR2_HUMAN Cytochrome b-c1 complex subunit 2, mitochondrial OS=Homo sapiens GN=UQCRC2 PE=1 SV=3;>tr|H3BSJ9|H3BSJ9_HUMAN Cytochrome b-c1	Cytochrome b-c1 complex subunit 2, mitochondrial	44.634	412	1.1678	1.1834	2	0.40002	0.64888	4	7.8	23.3	2	6	21472000	16638000	65608000	151710000
HCC5;MCM3	>tr|Q8NHX6|Q8NHX6_HUMAN Cervical cancer proto-oncogene 5 OS=Homo sapiens GN=HCC5 PE=2 SV=1;>tr|Q53HJ4|Q53HJ4_HUMAN Minichromosome maintenance protein 3 variant (Fragment) OS=Homo sapiens PE=2 SV=1;>tr|B2R7C5|B2R7C5_HUMAN cDNA, FLJ93378, highly similar to H	DNA replication licensing factor MCM3	75.786	676	1.1547	1.1821	2	0.48302	0.78359	2	3.1	3.1	2	2	39271000	38903000	21475000	47418000
CHD3	>sp|Q12873|CHD3_HUMAN Chromodomain-helicase-DNA-binding protein 3 OS=Homo sapiens GN=CHD3 PE=1 SV=3;>sp|Q12873-3|CHD3_HUMAN Isoform 3 of Chromodomain-helicase-DNA-binding protein 3 OS=Homo sapiens GN=CHD3;>sp|Q12873-2|CHD3_HUMAN Isoform 2 of Chromodomain-h	Chromodomain-helicase-DNA-binding protein 3	226.59	2000	1.2194	1.1817	4	0.36764	0.58447	2	12.5	8.6	6	2	155330000	112870000	14503000	41942000
VEZF1	>tr|J3QSH4|J3QSH4_HUMAN Vascular endothelial zinc finger 1 OS=Homo sapiens GN=VEZF1 PE=1 SV=1;>sp|Q14119|VEZF1_HUMAN Vascular endothelial zinc finger 1 OS=Homo sapiens GN=VEZF1 PE=1 SV=2	Vascular endothelial zinc finger 1	55.793	512	1.3417	1.1817	5	0.49334	0.79459	6	13.1	13.7	5	5	56539000	45471000	37599000	138940000
KMT2A	>sp|Q03164-2|KMT2A_HUMAN Isoform 2 of Histone-lysine N-methyltransferase 2A OS=Homo sapiens GN=KMT2A;>sp|Q03164|KMT2A_HUMAN Histone-lysine N-methyltransferase 2A OS=Homo sapiens GN=KMT2A PE=1 SV=5;>sp|Q03164-3|KMT2A_HUMAN Isoform 3 of Histone-lysine N-meth	Histone-lysine N-methyltransferase 2A;MLL cleavage product N320;MLL cleavage product C180	427.73	3931	1.1767	1.1811	9	0.40993	0.65685	5	3.8	3.1	12	9	346220000	283720000	138000000	259450000
SUPT16H	>sp|Q9Y5B9|SP16H_HUMAN FACT complex subunit SPT16 OS=Homo sapiens GN=SUPT16H PE=1 SV=1	FACT complex subunit SPT16	119.91	1047	1.1344	1.1788	3	0.45215	0.7635	2	3.3	2.2	3	2	107810000	88110000	43148000	85176000
TFAM	>tr|Q6LES8|Q6LES8_HUMAN TFAM protein (Fragment) OS=Homo sapiens GN=TFAM PE=2 SV=1;>tr|E5KSX8|E5KSX8_HUMAN Mitochondrial transcription factor A OS=Homo sapiens PE=4 SV=1;>tr|E5KSU5|E5KSU5_HUMAN Mitochondrial transcription factor A OS=Homo sapiens GN=TFAM PE	Transcription factor A, mitochondrial	29.082	246	1.1085	1.1765	10	0.57769	0.94441	9	38.2	29.7	11	9	705500000	628390000	300250000	439830000
RIF1	>sp|Q5UIP0-2|RIF1_HUMAN Isoform 2 of Telomere-associated protein RIF1 OS=Homo sapiens GN=RIF1;>sp|Q5UIP0|RIF1_HUMAN Telomere-associated protein RIF1 OS=Homo sapiens GN=RIF1 PE=1 SV=2	Telomere-associated protein RIF1	271.69	2446	1.2261	1.1734	40	0.57948	0.96376	37	22.1	22.3	45	41	2540800000	1884000000	1355000000	2093500000
KIAA0020	>sp|Q15397|K0020_HUMAN Pumilio domain-containing protein KIAA0020 OS=Homo sapiens GN=KIAA0020 PE=1 SV=3;>tr|B2RDG4|B2RDG4_HUMAN cDNA, FLJ96597 OS=Homo sapiens PE=2 SV=1	Pumilio domain-containing protein KIAA0020	73.584	648	1.153	1.1722	5	0.55975	0.89195	2	9	2.3	5	2	164790000	95490000	17303000	30426000
ATP5H	>sp|O75947-2|ATP5H_HUMAN Isoform 2 of ATP synthase subunit d, mitochondrial OS=Homo sapiens GN=ATP5H;>sp|O75947|ATP5H_HUMAN ATP synthase subunit d, mitochondrial OS=Homo sapiens GN=ATP5H PE=1 SV=3;>tr|F5H608|F5H608_HUMAN ATP synthase subunit d, mitochondri	ATP synthase subunit d, mitochondrial	15.773	137	1.2752	1.1708	3	0.51284	0.81252	4	32.8	40.1	4	5	118280000	93528000	77564000	168930000
SLC4A1AP	>tr|A0A087X0M4|A0A087X0M4_HUMAN Kanadaptin OS=Homo sapiens GN=SLC4A1AP PE=1 SV=1;>sp|Q9BWU0|NADAP_HUMAN Kanadaptin OS=Homo sapiens GN=SLC4A1AP PE=1 SV=1	Kanadaptin	82.89	742	1.1505	1.1684	6	0.49633	0.8456	4	12	6.5	7	4	79379000	74963000	42848000	64562000
RFX5;DKFZp586K091	>tr|Q53EW3|Q53EW3_HUMAN Regulatory factor X, 5 variant (Fragment) OS=Homo sapiens PE=2 SV=1;>tr|B2R5R9|B2R5R9_HUMAN cDNA, FLJ92591, highly similar to Homo sapiens regulatory factor X, 5 (influences HLA class IIexpression) (RFX5), mRNA OS=Homo sapiens PE=2	DNA-binding protein RFX5	65.265	616	1.2386	1.1684	4	0.52696	0.86772	5	10.6	13.1	5	6	66042000	53165000	48037000	79534000
VDAC1	>sp|P21796|VDAC1_HUMAN Voltage-dependent anion-selective channel protein 1 OS=Homo sapiens GN=VDAC1 PE=1 SV=2;>tr|B3KTS5|B3KTS5_HUMAN cDNA FLJ38670 fis, clone HSYRA2000190, highly similar to Voltage-dependent anion-selective channel protein 1 OS=Homo sapie	Voltage-dependent anion-selective channel protein 1	30.772	283	1.2776	1.1681	6	0.69626	1.0662	6	18.7	26.1	5	6	309940000	231040000	239320000	340850000
CCDC174	>sp|Q6PII3|CC174_HUMAN Coiled-coil domain-containing protein 174 OS=Homo sapiens GN=CCDC174 PE=2 SV=3;>tr|A0A087WYA9|A0A087WYA9_HUMAN Coiled-coil domain-containing protein 174 OS=Homo sapiens GN=CCDC174 PE=4 SV=1	Coiled-coil domain-containing protein 174	53.957	467	1.147	1.1674	3	0.55314	1.002	5	9.6	10.5	4	5	48566000	42796000	54405000	83745000
HEL-S-133P;LDHA	>tr|V9HWB9|V9HWB9_HUMAN L-lactate dehydrogenase OS=Homo sapiens GN=HEL-S-133P PE=2 SV=1;>sp|P00338-5|LDHA_HUMAN Isoform 5 of L-lactate dehydrogenase A chain OS=Homo sapiens GN=LDHA;>sp|P00338-4|LDHA_HUMAN Isoform 4 of L-lactate dehydrogenase A chain OS=Hom	L-lactate dehydrogenase;L-lactate dehydrogenase A chain	36.688	332	1.2519	1.1668	3	NA	NA	0	10.5	3.6	2	0	134030000	102930000	0	0
COX5A	>sp|P20674|COX5A_HUMAN Cytochrome c oxidase subunit 5A, mitochondrial OS=Homo sapiens GN=COX5A PE=1 SV=2;>tr|H3BNX8|H3BNX8_HUMAN Cytochrome c oxidase subunit 5A, mitochondrial OS=Homo sapiens GN=COX5A PE=1 SV=1;>tr|H3BRM5|H3BRM5_HUMAN Cytochrome c oxidase	Cytochrome c oxidase subunit 5A, mitochondrial	16.762	150	1.1603	1.1651	5	0.44294	0.73762	9	57.3	57.3	7	7	572960000	469310000	640570000	1366100000
ZNF318	>sp|Q5VUA4|ZN318_HUMAN Zinc finger protein 318 OS=Homo sapiens GN=ZNF318 PE=1 SV=2	Zinc finger protein 318	251.11	2279	1.1607	1.1649	30	0.70099	1.119	32	15	16.7	27	33	1166000000	1002000000	968880000	1338400000
SAP30BP	>tr|A0A024R8R0|A0A024R8R0_HUMAN SAP30 binding protein, isoform CRA_a OS=Homo sapiens GN=SAP30BP PE=4 SV=1;>tr|J3QQJ0|J3QQJ0_HUMAN SAP30-binding protein (Fragment) OS=Homo sapiens GN=SAP30BP PE=1 SV=1;>sp|Q9UHR5-2|S30BP_HUMAN Isoform 2 of SAP30-binding prot	SAP30-binding protein	33.87	308	1.2063	1.1618	10	0.78182	1.222	7	38.3	26.6	10	7	797180000	593180000	377060000	475730000
RPS25	>sp|P62851|RS25_HUMAN 40S ribosomal protein S25 OS=Homo sapiens GN=RPS25 PE=1 SV=1	40S ribosomal protein S25	13.742	125	1.2189	1.1617	5	0.82362	1.279	6	29.6	29.6	5	5	342580000	315990000	270770000	372320000
CHD8	>sp|Q9HCK8|CHD8_HUMAN Chromodomain-helicase-DNA-binding protein 8 OS=Homo sapiens GN=CHD8 PE=1 SV=5;>sp|Q9HCK8-2|CHD8_HUMAN Isoform 2 of Chromodomain-helicase-DNA-binding protein 8 OS=Homo sapiens GN=CHD8	Chromodomain-helicase-DNA-binding protein 8	290.52	2581	1.1982	1.1593	17	0.63434	1.0003	10	12	12.4	17	19	731090000	726240000	344840000	617360000
NAT11;NAA40	>tr|A0A024R5C6|A0A024R5C6_HUMAN N-acetyltransferase 11, isoform CRA_a OS=Homo sapiens GN=NAT11 PE=4 SV=1;>sp|Q86UY6-3|NAA40_HUMAN Isoform 2 of N-alpha-acetyltransferase 40 OS=Homo sapiens GN=NAA40;>sp|Q86UY6|NAA40_HUMAN N-alpha-acetyltransferase 40 OS=Homo	N-alpha-acetyltransferase 40	27.194	237	1.1989	1.1575	2	0.50257	0.80965	4	16.9	27	3	5	41973000	42418000	50385000	97063000
ZC3H18	>tr|E7ERS3|E7ERS3_HUMAN Zinc finger CCCH domain-containing protein 18 OS=Homo sapiens GN=ZC3H18 PE=1 SV=1;>tr|B4DTK7|B4DTK7_HUMAN cDNA FLJ61387, highly similar to Homo sapiens conserved nuclear protein NHN1 (NHN1), mRNA OS=Homo sapiens PE=2 SV=1;>sp|Q86VM9	Zinc finger CCCH domain-containing protein 18	108.94	977	1.1397	1.1568	7	0.61442	0.84767	3	9.3	2.9	8	3	271660000	202280000	30618000	52650000
PRPF3	>tr|Q53GV6|Q53GV6_HUMAN PRP3 pre-mRNA processing factor 3 homolog (Fragment) OS=Homo sapiens PE=2 SV=1;>tr|B2R791|B2R791_HUMAN cDNA, FLJ93335, highly similar to Homo sapiens PRP3 pre-mRNA processing factor 3 homolog (yeast) (PRPF3), mRNA OS=Homo sapiens PE	U4/U6 small nuclear ribonucleoprotein Prp3	77.44	683	1.1868	1.1567	23	0.61887	0.97683	17	39.8	29.7	23	17	1576800000	1304800000	741190000	1120400000
CAAP1	>sp|Q9H8G2|CAAP1_HUMAN Caspase activity and apoptosis inhibitor 1 OS=Homo sapiens GN=CAAP1 PE=1 SV=2;>tr|B4DUP7|B4DUP7_HUMAN cDNA FLJ50744 OS=Homo sapiens PE=2 SV=1;>sp|Q9H8G2-2|CAAP1_HUMAN Isoform 2 of Caspase activity and apoptosis inhibitor 1 OS=Homo sa	Caspase activity and apoptosis inhibitor 1	38.367	361	1.288	1.1553	4	0.51478	0.81667	3	10.5	12.5	3	3	86940000	69813000	33684000	60912000
LENG8	>tr|A0A024R4R9|A0A024R4R9_HUMAN Leukocyte receptor cluster (LRC) member 8, isoform CRA_a OS=Homo sapiens GN=LENG8 PE=4 SV=1;>sp|Q96PV6-2|LENG8_HUMAN Isoform 2 of Leukocyte receptor cluster member 8 OS=Homo sapiens GN=LENG8;>tr|A0A087WTE7|A0A087WTE7_HUMAN L	Leukocyte receptor cluster member 8	88.156	800	1.1172	1.1471	30	0.53821	0.85505	25	36	40.2	24	26	1723300000	1614100000	907260000	1614400000
ATRX	>tr|A4LAA3|A4LAA3_HUMAN Alpha thalassemia/mental retardation syndrome X-linked OS=Homo sapiens GN=ATRX PE=4 SV=1;>sp|P46100-4|ATRX_HUMAN Isoform 3 of Transcriptional regulator ATRX OS=Homo sapiens GN=ATRX;>sp|P46100|ATRX_HUMAN Transcriptional regulator ATR	Transcriptional regulator ATRX	282.58	2492	1.1785	1.1444	16	0.5012	0.84586	22	5.5	10.1	13	21	508220000	428130000	443980000	732300000
FAM98A	>tr|E9PH82|E9PH82_HUMAN Protein FAM98A OS=Homo sapiens GN=FAM98A PE=1 SV=1;>tr|I6L9E8|I6L9E8_HUMAN Family with sequence similarity 98, member A OS=Homo sapiens GN=FAM98A PE=2 SV=1;>sp|Q8NCA5-2|FA98A_HUMAN Isoform 2 of Protein FAM98A OS=Homo sapiens GN=FAM9	Protein FAM98A	34.431	312	1.1279	1.1429	3	0.73886	1.1841	4	11.9	11.9	2	2	115690000	105180000	77153000	111920000
ATP5O	>sp|P48047|ATPO_HUMAN ATP synthase subunit O, mitochondrial OS=Homo sapiens GN=ATP5O PE=1 SV=1;>tr|Q53HH2|Q53HH2_HUMAN Mitochondrial ATP synthase, O subunit variant (Fragment) OS=Homo sapiens PE=2 SV=1;>tr|H7C0C1|H7C0C1_HUMAN Uncharacterized protein (Fragm	ATP synthase subunit O, mitochondrial	23.277	213	1.1309	1.1421	4	0.56887	0.94218	8	25.8	62	4	10	400730000	311940000	489270000	855880000
NUP98	>sp|P52948-6|NUP98_HUMAN Isoform 6 of Nuclear pore complex protein Nup98-Nup96 OS=Homo sapiens GN=NUP98;>sp|P52948-2|NUP98_HUMAN Isoform 2 of Nuclear pore complex protein Nup98-Nup96 OS=Homo sapiens GN=NUP98;>sp|P52948-5|NUP98_HUMAN Isoform 5 of Nuclear po	Nuclear pore complex protein Nup98-Nup96;Nuclear pore complex protein Nup98;Nuclear pore complex protein Nup96	186.27	1714	0.79453	1.1414	3	0.98159	1.5596	3	2.5	1.8	4	3	43060000	45766000	27491000	28091000
TAF4	>tr|V9GY14|V9GY14_HUMAN Transcription initiation factor TFIID subunit 4 (Fragment) OS=Homo sapiens GN=TAF4 PE=4 SV=1;>sp|O00268|TAF4_HUMAN Transcription initiation factor TFIID subunit 4 OS=Homo sapiens GN=TAF4 PE=1 SV=2	Transcription initiation factor TFIID subunit 4	22.738	215	1.1126	1.1407	3	NA	NA	1	13	6.5	2	1	96903000	86338000	16653000	22564000
RFC4	>tr|C9JZI1|C9JZI1_HUMAN Replication factor C subunit 4 OS=Homo sapiens GN=RFC4 PE=1 SV=1;>sp|P35249-2|RFC4_HUMAN Isoform 2 of Replication factor C subunit 4 OS=Homo sapiens GN=RFC4;>sp|P35249|RFC4_HUMAN Replication factor C subunit 4 OS=Homo sapiens GN=RFC	Replication factor C subunit 4	36.877	336	1.1072	1.1396	6	0.55796	0.86827	4	19	12.5	6	4	123630000	119160000	46389000	64994000
RACGAP1	>tr|B2RE34|B2RE34_HUMAN cDNA, FLJ96901, highly similar to Homo sapiens Rac GTPase activating protein 1 (RACGAP1), mRNA OS=Homo sapiens PE=2 SV=1;>tr|A0A024R136|A0A024R136_HUMAN Rac GTPase activating protein 1, isoform CRA_a OS=Homo sapiens GN=RACGAP1 PE=4	Rac GTPase-activating protein 1	70.968	632	1.169	1.1392	3	0.4161	0.70576	4	5.7	8.2	3	4	46923000	38014000	57178000	119550000
WHSC1L1	>sp|Q9BZ95-3|NSD3_HUMAN Isoform 3 of Histone-lysine N-methyltransferase NSD3 OS=Homo sapiens GN=WHSC1L1;>sp|Q9BZ95-4|NSD3_HUMAN Isoform 4 of Histone-lysine N-methyltransferase NSD3 OS=Homo sapiens GN=WHSC1L1;>sp|Q9BZ95-2|NSD3_HUMAN Isoform 2 of Histone-lys	Histone-lysine N-methyltransferase NSD3	72.62	645	1.1887	1.1364	7	0.52196	0.83445	4	8.8	12.7	5	6	135130000	114540000	101940000	185120000
MBD4	>sp|O95243-6|MBD4_HUMAN Isoform 4 of Methyl-CpG-binding domain protein 4 OS=Homo sapiens GN=MBD4;>sp|O95243-3|MBD4_HUMAN Isoform 3 of Methyl-CpG-binding domain protein 4 OS=Homo sapiens GN=MBD4;>sp|O95243-5|MBD4_HUMAN Isoform 5 of Methyl-CpG-binding domain	Methyl-CpG-binding domain protein 4	30.315	262	1.1618	1.1359	2	NA	NA	0	6.9	0	2	0	37993000	43973000	0	0
CCNT1	>tr|A8K4M5|A8K4M5_HUMAN cDNA FLJ76043, highly similar to Homo sapiens cyclin T1 (CCNT1), mRNA OS=Homo sapiens PE=2 SV=1;>sp|O60563|CCNT1_HUMAN Cyclin-T1 OS=Homo sapiens GN=CCNT1 PE=1 SV=1	Cyclin-T1	80.585	726	1.232	1.1358	2	0.55511	0.83006	4	2.9	7	2	5	19083000	14380000	56146000	120750000
SART3	>sp|Q15020|SART3_HUMAN Squamous cell carcinoma antigen recognized by T-cells 3 OS=Homo sapiens GN=SART3 PE=1 SV=1;>sp|Q15020-4|SART3_HUMAN Isoform 4 of Squamous cell carcinoma antigen recognized by T-cells 3 OS=Homo sapiens GN=SART3;>tr|B4DRG9|B4DRG9_HUMAN	Squamous cell carcinoma antigen recognized by T-cells 3	109.93	963	1.1062	1.1347	4	0.48949	0.79878	4	4.6	8.1	5	6	104510000	83445000	61511000	149440000
C14orf43;ELMSAN1	>tr|A0A0A0MSU2|A0A0A0MSU2_HUMAN ELM2 and SANT domain-containing protein 1 (Fragment) OS=Homo sapiens GN=ELMSAN1 PE=4 SV=1;>tr|A0PJD3|A0PJD3_HUMAN C14orf43 protein (Fragment) OS=Homo sapiens GN=C14orf43 PE=2 SV=1;>tr|A0A024R689|A0A024R689_HUMAN Chromosome 1	ELM2 and SANT domain-containing protein 1	111.92	1019	1.2776	1.1335	5	0.49878	0.78995	5	8.3	7.1	7	6	151360000	123490000	49939000	79291000
NDUFS6	>tr|Q6IBC4|Q6IBC4_HUMAN NADH dehydrogenase (Ubiquinone) Fe-S protein 6, 13kDa (NADH-coenzyme Q reductase), isoform CRA_a OS=Homo sapiens GN=NDUFS6 PE=2 SV=1;>sp|O75380|NDUS6_HUMAN NADH dehydrogenase [ubiquinone] iron-sulfur protein 6, mitochondrial OS=Homo	NADH dehydrogenase [ubiquinone] iron-sulfur protein 6, mitochondrial	13.711	124	1.2229	1.1313	5	0.58628	0.9972	7	41.1	60.5	4	6	171630000	135570000	235990000	429430000
FEN1	>tr|Q6FHX6|Q6FHX6_HUMAN Flap endonuclease 1 OS=Homo sapiens GN=FEN1 PE=2 SV=1;>sp|P39748|FEN1_HUMAN Flap endonuclease 1 OS=Homo sapiens GN=FEN1 PE=1 SV=1;>tr|B4DWZ4|B4DWZ4_HUMAN Flap endonuclease 1 OS=Homo sapiens GN=FEN1 PE=2 SV=1;>sp|P39748-2|FEN1_HUMAN	Flap endonuclease 1	42.592	380	1.1337	1.1308	9	0.46581	0.7189	5	39.5	24.2	10	7	569990000	543130000	243860000	477220000
RPS21	>tr|Q8WVC2|Q8WVC2_HUMAN 40S ribosomal protein S21 OS=Homo sapiens GN=RPS21 PE=1 SV=1;>tr|Q6FGH5|Q6FGH5_HUMAN RPS21 protein (Fragment) OS=Homo sapiens GN=RPS21 PE=2 SV=1;>sp|P63220|RS21_HUMAN 40S ribosomal protein S21 OS=Homo sapiens GN=RPS21 PE=1 SV=1;>tr|	40S ribosomal protein S21	8.85	81	1.0809	1.1305	3	0.83683	1.3846	4	59.3	49.4	4	4	137850000	125420000	99704000	94904000
ADAR	>sp|P55265-5|DSRAD_HUMAN Isoform 5 of Double-stranded RNA-specific adenosine deaminase OS=Homo sapiens GN=ADAR;>sp|P55265|DSRAD_HUMAN Double-stranded RNA-specific adenosine deaminase OS=Homo sapiens GN=ADAR PE=1 SV=4;>sp|P55265-4|DSRAD_HUMAN Isoform 4 of D	Double-stranded RNA-specific adenosine deaminase	103.64	931	1.1423	1.1304	14	0.52638	0.83751	16	15.5	23.3	14	18	477540000	363930000	338010000	630010000
NSRP1;CCDC55	>tr|B2R9Y2|B2R9Y2_HUMAN cDNA, FLJ94609 OS=Homo sapiens PE=2 SV=1;>sp|Q9H0G5|NSRP1_HUMAN Nuclear speckle splicing regulatory protein 1 OS=Homo sapiens GN=NSRP1 PE=1 SV=1;>tr|B7Z4B1|B7Z4B1_HUMAN cDNA FLJ50801, highly similar to Coiled-coil domain-containing	Nuclear speckle splicing regulatory protein 1	66.388	558	1.2272	1.1278	6	0.54761	0.8719	4	13.8	8.8	7	4	248740000	174870000	62798000	102650000
RPS3	>tr|Q53G83|Q53G83_HUMAN Ribosomal protein S3 variant (Fragment) OS=Homo sapiens PE=2 SV=1;>sp|P23396|RS3_HUMAN 40S ribosomal protein S3 OS=Homo sapiens GN=RPS3 PE=1 SV=2;>sp|P23396-2|RS3_HUMAN Isoform 2 of 40S ribosomal protein S3 OS=Homo sapiens GN=RPS3;>	40S ribosomal protein S3	26.689	243	1.1046	1.1264	9	0.62227	1.0305	7	45.3	34.6	10	9	298020000	293340000	157530000	238340000
RPS29	>sp|P62273|RS29_HUMAN 40S ribosomal protein S29 OS=Homo sapiens GN=RPS29 PE=1 SV=2;>sp|P62273-2|RS29_HUMAN Isoform 2 of 40S ribosomal protein S29 OS=Homo sapiens GN=RPS29;>tr|A0A087WTT6|A0A087WTT6_HUMAN 40S ribosomal protein S29 OS=Homo sapiens GN=RPS29 PE	40S ribosomal protein S29	6.6767	56	1.0991	1.1253	2	0.71118	1.1224	4	32.1	32.1	2	2	85651000	69581000	117510000	157500000
NVL	>tr|B4DLM8|B4DLM8_HUMAN cDNA FLJ56105, highly similar to Nuclear valosin-containing protein-like OS=Homo sapiens PE=2 SV=1;>sp|O15381|NVL_HUMAN Nuclear valosin-containing protein-like OS=Homo sapiens GN=NVL PE=1 SV=1;>sp|O15381-5|NVL_HUMAN Isoform 5 of Nuc	Nuclear valosin-containing protein-like	95.078	856	1.21	1.1238	12	0.41693	0.68387	14	21.5	21.3	15	14	462750000	432720000	220830000	494290000
DDX46	>tr|A8K6X3|A8K6X3_HUMAN cDNA FLJ78679, highly similar to Homo sapiens DEAD (Asp-Glu-Ala-Asp) box polypeptide 46 (DDX46), mRNA OS=Homo sapiens PE=2 SV=1;>sp|Q7L014|DDX46_HUMAN Probable ATP-dependent RNA helicase DDX46 OS=Homo sapiens GN=DDX46 PE=1 SV=2;>tr|	Probable ATP-dependent RNA helicase DDX46	117.47	1032	1.1729	1.1236	9	0.69689	1.0986	5	9.8	7.8	10	8	289640000	264550000	72475000	300980000
DHX9	>sp|Q08211|DHX9_HUMAN ATP-dependent RNA helicase A OS=Homo sapiens GN=DHX9 PE=1 SV=4	ATP-dependent RNA helicase A	140.96	1270	1.108	1.1227	37	0.6101	0.92774	35	31.3	33.3	36	36	2720500000	3882400000	1489300000	2489400000
SMARCA5	>tr|B7ZAX9|B7ZAX9_HUMAN cDNA, FLJ79343, highly similar to SWI/SNF-related matrix-associated actin-dependent regulator of chromatin subfamily A member 5 (EC 3.6.1.-) OS=Homo sapiens PE=2 SV=1;>tr|B4DZC0|B4DZC0_HUMAN cDNA FLJ51771, highly similar to SWI/SNF-	SWI/SNF-related matrix-associated actin-dependent regulator of chromatin subfamily A member 5	116.77	995	1.16	1.1221	32	0.66518	1.0522	31	32.9	27.4	33	28	1744400000	1452200000	1228900000	1795200000
HEL-S-103;HSPA1A	>tr|A8K5I0|A8K5I0_HUMAN Epididymis secretory protein Li 103 OS=Homo sapiens GN=HEL-S-103 PE=2 SV=1;>tr|Q59EJ3|Q59EJ3_HUMAN Heat shock 70kDa protein 1A variant (Fragment) OS=Homo sapiens PE=2 SV=1;>sp|P08107|HSP71_HUMAN Heat shock 70 kDa protein 1A/1B OS=Ho	Heat shock 70 kDa protein 1A/1B	70.051	641	1.2013	1.1216	15	0.44527	0.70354	12	27.5	27	6	6	848140000	726990000	433110000	943030000
RPS28	>tr|B2R4R9|B2R4R9_HUMAN HCG26477 OS=Homo sapiens GN=RPS28 PE=2 SV=1;>sp|P62857|RS28_HUMAN 40S ribosomal protein S28 OS=Homo sapiens GN=RPS28 PE=1 SV=1	40S ribosomal protein S28	7.8409	69	1.0718	1.1211	4	0.7234	1.0948	3	46.4	46.4	3	3	1048600000	919090000	945530000	1242400000
HCFC1	>tr|A6NEM2|A6NEM2_HUMAN HCF N-terminal chain 5 OS=Homo sapiens GN=HCFC1 PE=1 SV=2;>sp|P51610-4|HCFC1_HUMAN Isoform 4 of Host cell factor 1 OS=Homo sapiens GN=HCFC1;>sp|P51610-2|HCFC1_HUMAN Isoform 2 of Host cell factor 1 OS=Homo sapiens GN=HCFC1;>sp|P51610	Host cell factor 1;HCF N-terminal chain 1;HCF N-terminal chain 2;HCF N-terminal chain 3;HCF N-terminal chain 4;HCF N-terminal chain 5;HCF N-terminal chain 6;HCF C-terminal chain 1;HCF C-terminal chain 2;HCF C-terminal chain 3;HCF C-terminal chain 4;HCF C-terminal chain 5;HCF C-terminal chain 6	213.47	2080	1.2649	1.1154	23	0.51819	0.90612	19	12.2	14.2	21	23	785460000	634020000	459670000	857570000
PPHLN1	>tr|F8W0Q9|F8W0Q9_HUMAN Periphilin-1 OS=Homo sapiens GN=PPHLN1 PE=1 SV=1;>sp|Q8NEY8-9|PPHLN_HUMAN Isoform 9 of Periphilin-1 OS=Homo sapiens GN=PPHLN1;>sp|Q8NEY8-8|PPHLN_HUMAN Isoform 8 of Periphilin-1 OS=Homo sapiens GN=PPHLN1;>sp|Q8NEY8-2|PPHLN_HUMAN Isof	Periphilin-1	44.682	385	1.0966	1.1139	3	0.62154	1.0604	10	8.3	15.3	4	7	55150000	51042000	131580000	181560000
CDK12	>sp|Q9NYV4-2|CDK12_HUMAN Isoform 2 of Cyclin-dependent kinase 12 OS=Homo sapiens GN=CDK12;>sp|Q9NYV4|CDK12_HUMAN Cyclin-dependent kinase 12 OS=Homo sapiens GN=CDK12 PE=1 SV=2;>tr|J3QSD7|J3QSD7_HUMAN Cyclin-dependent kinase 12 (Fragment) OS=Homo sapiens GN=	Cyclin-dependent kinase 12	163.23	1481	1.0383	1.1133	6	0.61093	1.0234	12	10.3	11	9	11	445050000	345020000	246870000	431380000
RBM17	>tr|Q5W009|Q5W009_HUMAN RNA binding motif protein 17, isoform CRA_a OS=Homo sapiens GN=RBM17 PE=2 SV=1;>sp|Q96I25|SPF45_HUMAN Splicing factor 45 OS=Homo sapiens GN=RBM17 PE=1 SV=1	Splicing factor 45	44.961	401	1.1391	1.1131	11	0.70757	1.0756	10	32.4	26.4	12	9	897690000	816850000	525940000	764290000
TCERG1	>sp|O14776-2|TCRG1_HUMAN Isoform 2 of Transcription elongation regulator 1 OS=Homo sapiens GN=TCERG1;>sp|O14776|TCRG1_HUMAN Transcription elongation regulator 1 OS=Homo sapiens GN=TCERG1 PE=1 SV=2;>tr|G3V220|G3V220_HUMAN Transcription elongation regulator	Transcription elongation regulator 1	121.69	1077	1.0968	1.1131	27	0.71766	1.1077	30	25.3	24.3	29	28	1655600000	1469100000	1297900000	1826300000
RPS5	>tr|M0R0F0|M0R0F0_HUMAN 40S ribosomal protein S5 (Fragment) OS=Homo sapiens GN=RPS5 PE=1 SV=1;>tr|Q53G25|Q53G25_HUMAN Ribosomal protein S5 variant (Fragment) OS=Homo sapiens PE=2 SV=1;>tr|A0A024R4Q8|A0A024R4Q8_HUMAN Ribosomal protein S5, isoform CRA_a OS=H	40S ribosomal protein S5;40S ribosomal protein S5, N-terminally processed	22.391	200	1.1015	1.1095	4	0.68988	1.0613	5	26.5	27	5	5	221370000	202690000	182750000	249910000
PARP1	>tr|A0A024R3T8|A0A024R3T8_HUMAN Poly (ADP-ribose) polymerase family, member 1, isoform CRA_a OS=Homo sapiens GN=PARP1 PE=4 SV=1;>sp|P09874|PARP1_HUMAN Poly [ADP-ribose] polymerase 1 OS=Homo sapiens GN=PARP1 PE=1 SV=4;>tr|B4E0E1|B4E0E1_HUMAN cDNA FLJ53442,	Poly [ADP-ribose] polymerase 1	113.08	1014	1.1176	1.1063	55	0.49435	0.76883	52	46.3	45.7	41	41	4627600000	3841400000	3485100000	6301900000
CXorf56;hCG_1640171	>sp|Q9H5V9-3|CX056_HUMAN Isoform 3 of UPF0428 protein CXorf56 OS=Homo sapiens GN=CXorf56;>sp|Q9H5V9|CX056_HUMAN UPF0428 protein CXorf56 OS=Homo sapiens GN=CXorf56 PE=1 SV=1;>sp|Q9H5V9-2|CX056_HUMAN Isoform 2 of UPF0428 protein CXorf56 OS=Homo sapiens GN=CX	UPF0428 protein CXorf56	23.936	208	1.113	1.1023	7	0.69788	1.0604	6	31.7	27.4	7	6	524670000	418900000	233060000	291270000
ACIN1	>tr|S4R3H4|S4R3H4_HUMAN Apoptotic chromatin condensation inducer in the nucleus OS=Homo sapiens GN=ACIN1 PE=1 SV=1;>tr|E7EQT4|E7EQT4_HUMAN Apoptotic chromatin condensation inducer in the nucleus OS=Homo sapiens GN=ACIN1 PE=1 SV=2;>sp|Q9UKV3|ACINU_HUMAN Apo	Apoptotic chromatin condensation inducer in the nucleus	145.44	1283	1.0453	1.1021	55	0.61822	1.0387	53	35.5	36.7	3	3	8505700000	7423700000	5717900000	8226600000
EEF1E1;EEF1E1-BLOC1S5	>tr|D6RBD7|D6RBD7_HUMAN Eukaryotic translation elongation factor 1 epsilon-1 OS=Homo sapiens GN=EEF1E1 PE=4 SV=1;>tr|C9J1V9|C9J1V9_HUMAN HCG2043275 OS=Homo sapiens GN=EEF1E1-BLOC1S5 PE=4 SV=2;>sp|O43324-2|MCA3_HUMAN Isoform 2 of Eukaryotic translation elon	Eukaryotic translation elongation factor 1 epsilon-1	16.686	150	1.1746	1.1014	2	NA	NA	1	14	7.3	2	1	33867000	29108000	16778000	19458000
RPL30	>tr|E5RI99|E5RI99_HUMAN 60S ribosomal protein L30 (Fragment) OS=Homo sapiens GN=RPL30 PE=1 SV=1;>tr|A0A024R9D3|A0A024R9D3_HUMAN Ribosomal protein L30, isoform CRA_b OS=Homo sapiens GN=RPL30 PE=3 SV=1;>sp|P62888|RL30_HUMAN 60S ribosomal protein L30 OS=Homo	60S ribosomal protein L30	12.656	114	1.264	1.1	3	0.67743	1.0688	2	30.7	30.7	2	2	133230000	120820000	74744000	112650000
ZMAT2	>sp|Q96NC0|ZMAT2_HUMAN Zinc finger matrin-type protein 2 OS=Homo sapiens GN=ZMAT2 PE=1 SV=1;>tr|R4GNG8|R4GNG8_HUMAN Zinc finger matrin-type protein 2 (Fragment) OS=Homo sapiens GN=ZMAT2 PE=1 SV=1	Zinc finger matrin-type protein 2	23.612	199	0.97922	1.0993	5	0.62541	0.99832	3	24.1	24.1	4	4	132690000	117650000	30557000	43996000
CDCA8	>tr|A8K7A2|A8K7A2_HUMAN cDNA FLJ78084, highly similar to Homo sapiens cell division cycle associated 8, mRNA OS=Homo sapiens PE=2 SV=1;>sp|Q53HL2|BOREA_HUMAN Borealin OS=Homo sapiens GN=CDCA8 PE=1 SV=2	Borealin	31.311	280	1.1192	1.0989	5	0.34888	0.56053	5	22.5	18.9	5	5	164490000	138240000	70715000	191970000
NCOR2	>tr|C9JE98|C9JE98_HUMAN Nuclear receptor corepressor 2 OS=Homo sapiens GN=NCOR2 PE=1 SV=1;>tr|A0A024RBU9|A0A024RBU9_HUMAN Nuclear receptor co-repressor 2, isoform CRA_a OS=Homo sapiens GN=NCOR2 PE=4 SV=1;>sp|Q9Y618-5|NCOR2_HUMAN Isoform 5 of Nuclear recept	Nuclear receptor corepressor 2	268.04	2458	1.1242	1.0987	2	NA	NA	0	1.3	0.9	2	1	44862000	45127000	0	0
PLRG1	>tr|D6RA26|D6RA26_HUMAN Pleiotropic regulator 1 (Fragment) OS=Homo sapiens GN=PLRG1 PE=4 SV=1;>sp|O43660-2|PLRG1_HUMAN Isoform 2 of Pleiotropic regulator 1 OS=Homo sapiens GN=PLRG1;>sp|O43660|PLRG1_HUMAN Pleiotropic regulator 1 OS=Homo sapiens GN=PLRG1 PE=	Pleiotropic regulator 1	23.52	212	1.0793	1.0982	2	0.54059	0.87457	2	9	9	2	2	44661000	38453000	25300000	61478000
TAF6	>tr|B3KUR4|B3KUR4_HUMAN cDNA FLJ40462 fis, clone TESTI2042062, highly similar to Transcription initiation factor TFIID subunit 6 OS=Homo sapiens PE=2 SV=1;>tr|A4D299|A4D299_HUMAN TAF6 RNA polymerase II, TATA box binding protein (TBP)-associated factor, 80k	Transcription initiation factor TFIID subunit 6	64.217	601	1.0854	1.0979	6	0.68962	1.1187	2	14.8	6.8	7	3	159140000	156430000	36319000	57958000
NUMA1 variant protein;NUMA1	>tr|Q4LE64|Q4LE64_HUMAN NUMA1 variant protein (Fragment) OS=Homo sapiens GN=NUMA1 variant protein PE=2 SV=1;>sp|Q14980|NUMA1_HUMAN Nuclear mitotic apparatus protein 1 OS=Homo sapiens GN=NUMA1 PE=1 SV=2;>sp|Q14980-4|NUMA1_HUMAN Isoform Numa-s of Nuclear mit	Nuclear mitotic apparatus protein 1	238.86	2121	1.0712	1.0937	130	0.6276	0.96807	121	57.6	52.2	0	1	15271000000	18469000000	8945700000	13544000000
DDX24	>tr|B4DM03|B4DM03_HUMAN cDNA FLJ50574, highly similar to ATP-dependent RNA helicase DDX24 (EC 3.6.1.-) OS=Homo sapiens PE=2 SV=1;>tr|G3V529|G3V529_HUMAN ATP-dependent RNA helicase DDX24 OS=Homo sapiens GN=DDX24 PE=1 SV=1;>sp|Q9GZR7|DDX24_HUMAN ATP-dependen	ATP-dependent RNA helicase DDX24	85.509	763	1.1218	1.0929	3	NA	NA	1	3.8	1.4	3	1	18485000	15533000	4171200	11530000
SNW1	>sp|Q13573|SNW1_HUMAN SNW domain-containing protein 1 OS=Homo sapiens GN=SNW1 PE=1 SV=1;>tr|Q6I9S2|Q6I9S2_HUMAN SNW1 protein OS=Homo sapiens GN=SNW1 PE=2 SV=1;>tr|B7Z9X2|B7Z9X2_HUMAN cDNA, FLJ78986, highly similar to SNW domain-containing protein 1 OS=Homo	SNW domain-containing protein 1	61.494	536	1.0242	1.0922	22	0.64891	1.0467	24	42	44	21	21	1449500000	1470900000	950890000	1412900000
SARNP;CIP29;LOC402290	>sp|P82979|SARNP_HUMAN SAP domain-containing ribonucleoprotein OS=Homo sapiens GN=SARNP PE=1 SV=3;>tr|Q567R9|Q567R9_HUMAN CIP29 protein OS=Homo sapiens GN=CIP29 PE=2 SV=1;>tr|F8VZQ9|F8VZQ9_HUMAN SAP domain-containing ribonucleoprotein OS=Homo sapiens GN=SA	SAP domain-containing ribonucleoprotein	23.671	210	1.1803	1.0892	4	0.64365	1.0282	4	27.6	27.1	5	5	204300000	180980000	143860000	232340000
ELF2	>tr|B7Z720|B7Z720_HUMAN E74-like factor 2 (Ets domain transcription factor), isoform CRA_b OS=Homo sapiens GN=ELF2 PE=2 SV=1;>sp|Q15723-4|ELF2_HUMAN Isoform 4 of ETS-related transcription factor Elf-2 OS=Homo sapiens GN=ELF2;>sp|Q15723-2|ELF2_HUMAN Isoform	ETS-related transcription factor Elf-2	56.133	521	1.1456	1.0883	7	0.51252	0.84404	5	22.8	25.7	8	9	274210000	246060000	142720000	287680000
BAZ1B	>sp|Q9UIG0|BAZ1B_HUMAN Tyrosine-protein kinase BAZ1B OS=Homo sapiens GN=BAZ1B PE=1 SV=2;>sp|Q9UIG0-2|BAZ1B_HUMAN Isoform 2 of Tyrosine-protein kinase BAZ1B OS=Homo sapiens GN=BAZ1B	Tyrosine-protein kinase BAZ1B	170.9	1483	1.1191	1.0861	69	0.55787	0.88989	46	47.2	39.9	63	48	4995300000	4515800000	1917600000	3198500000
RPS19	>tr|B0ZBD0|B0ZBD0_HUMAN 40S ribosomal protein S19 OS=Homo sapiens GN=RPS19 PE=2 SV=1;>tr|Q8WVX7|Q8WVX7_HUMAN Ribosomal protein S19 (Fragment) OS=Homo sapiens PE=2 SV=1;>sp|P39019|RS19_HUMAN 40S ribosomal protein S19 OS=Homo sapiens GN=RPS19 PE=1 SV=2	40S ribosomal protein S19	16.06	145	1.0425	1.0852	9	0.72211	1.1257	10	53.1	53.8	9	11	475380000	430530000	643910000	871710000
HNRNPAB	>sp|Q99729-3|ROAA_HUMAN Isoform 3 of Heterogeneous nuclear ribonucleoprotein A/B OS=Homo sapiens GN=HNRNPAB;>tr|D6R9P3|D6R9P3_HUMAN Heterogeneous nuclear ribonucleoprotein A/B OS=Homo sapiens GN=HNRNPAB PE=1 SV=1;>tr|D6RD18|D6RD18_HUMAN Heterogeneous nucle	Heterogeneous nuclear ribonucleoprotein A/B	30.588	285	1.0748	1.0851	18	0.66254	1.0488	17	41.4	39.3	12	13	2971100000	2623200000	2204000000	3160200000
SSRP1	>tr|A0A024R4Z6|A0A024R4Z6_HUMAN Structure specific recognition protein 1, isoform CRA_a OS=Homo sapiens GN=SSRP1 PE=4 SV=1;>sp|Q08945|SSRP1_HUMAN FACT complex subunit SSRP1 OS=Homo sapiens GN=SSRP1 PE=1 SV=1	FACT complex subunit SSRP1	81.074	709	1.1331	1.0834	2	0.45657	0.74431	2	3.9	3.8	2	2	35948000	34036000	14574000	34053000
SNRPA1	>tr|Q53G61|Q53G61_HUMAN Small nuclear ribonucleoprotein polypeptide A variant (Fragment) OS=Homo sapiens PE=2 SV=1;>tr|Q53G21|Q53G21_HUMAN Small nuclear ribonucleoprotein polypeptide A variant (Fragment) OS=Homo sapiens PE=2 SV=1;>sp|P09661|RU2A_HUMAN U2	U2 small nuclear ribonucleoprotein A	28.401	255	1.0226	1.0792	10	0.72742	1.1616	11	34.1	42.4	8	9	1108600000	991380000	782790000	1150500000
DEK	>sp|P35659|DEK_HUMAN Protein DEK OS=Homo sapiens GN=DEK PE=1 SV=1;>tr|B4DNW3|B4DNW3_HUMAN cDNA FLJ51914, highly similar to Protein DEK OS=Homo sapiens PE=2 SV=1;>tr|B4DFG0|B4DFG0_HUMAN Protein DEK OS=Homo sapiens GN=DEK PE=1 SV=1;>sp|P35659-2|DEK_HUMAN Iso	Protein DEK	42.674	375	1.0751	1.0779	13	0.53944	0.85547	10	24.8	25.9	9	9	398370000	356330000	267850000	458000000
CHERP	>sp|Q8IWX8|CHERP_HUMAN Calcium homeostasis endoplasmic reticulum protein OS=Homo sapiens GN=CHERP PE=1 SV=3;>tr|J3QK89|J3QK89_HUMAN Calcium homeostasis endoplasmic reticulum protein OS=Homo sapiens GN=CHERP PE=1 SV=1;>tr|Q59ET1|Q59ET1_HUMAN Calcium homeost	Calcium homeostasis endoplasmic reticulum protein	103.7	916	1.0472	1.0714	14	0.61983	1.0158	17	16.7	23.1	13	15	522420000	470980000	506400000	755730000
TAF9B	>sp|Q9HBM6|TAF9B_HUMAN Transcription initiation factor TFIID subunit 9B OS=Homo sapiens GN=TAF9B PE=1 SV=1;>tr|B2R6H6|B2R6H6_HUMAN cDNA, FLJ92954, highly similar to Homo sapiens TAF9-like RNA polymerase II, TATA box binding protein (TBP)-associated factor,	Transcription initiation factor TFIID subunit 9B	27.622	251	1.0522	1.0712	8	0.66805	1.0983	7	37.5	34.3	4	3	481960000	391650000	210610000	304590000
PHB2	>tr|F5GY37|F5GY37_HUMAN Prohibitin-2 OS=Homo sapiens GN=PHB2 PE=1 SV=1;>tr|J3KPX7|J3KPX7_HUMAN Prohibitin-2 OS=Homo sapiens GN=PHB2 PE=1 SV=2;>sp|Q99623|PHB2_HUMAN Prohibitin-2 OS=Homo sapiens GN=PHB2 PE=1 SV=2;>tr|B4DW05|B4DW05_HUMAN cDNA FLJ60175, highly	Prohibitin-2	29.723	267	1.0676	1.0711	4	0.55529	0.89585	2	21.7	11.2	5	2	121190000	106000000	34691000	51857000
BPTF	>sp|Q12830-4|BPTF_HUMAN Isoform 4 of Nucleosome-remodeling factor subunit BPTF OS=Homo sapiens GN=BPTF;>sp|Q12830-2|BPTF_HUMAN Isoform 2 of Nucleosome-remodeling factor subunit BPTF OS=Homo sapiens GN=BPTF;>sp|Q12830|BPTF_HUMAN Nucleosome-remodeling factor	Nucleosome-remodeling factor subunit BPTF	322.21	2903	1.1604	1.0688	23	0.58603	0.93238	18	11.6	8.9	29	21	757900000	640240000	358170000	586480000
LYAR	>sp|Q9NX58|LYAR_HUMAN Cell growth-regulating nucleolar protein OS=Homo sapiens GN=LYAR PE=1 SV=2;>tr|A8K3Y5|A8K3Y5_HUMAN cDNA FLJ78186 OS=Homo sapiens PE=2 SV=1	Cell growth-regulating nucleolar protein	43.614	379	1.117	1.0679	19	0.60589	1.0172	15	45.4	33	14	12	1002100000	948870000	506890000	910320000
U2SURP	>sp|O15042-2|SR140_HUMAN Isoform 2 of U2 snRNP-associated SURP motif-containing protein OS=Homo sapiens GN=U2SURP;>sp|O15042|SR140_HUMAN U2 snRNP-associated SURP motif-containing protein OS=Homo sapiens GN=U2SURP PE=1 SV=2;>tr|E7ET15|E7ET15_HUMAN U2 snRNP-	U2 snRNP-associated SURP motif-containing protein	118.23	1028	1.0375	1.0675	31	0.70477	1.1189	28	28.9	30.9	28	27	2874300000	2755900000	1959300000	2693300000
TFAP2A;TFAP2E	>tr|Q96SH1|Q96SH1_HUMAN Transcription factor AP-2 alpha (Activating enhancer binding protein 2 alpha), isoform CRA_c OS=Homo sapiens GN=TFAP2A PE=1 SV=1;>sp|P05549-5|AP2A_HUMAN Isoform 2 of Transcription factor AP-2-alpha OS=Homo sapiens GN=TFAP2A;>sp|P055	Transcription factor AP-2-alpha;Transcription factor AP-2-epsilon	48.321	439	1.1095	1.0666	3	0.42817	0.69405	2	12.1	7.3	4	2	66523000	50318000	19112000	39809000
BCORL1	>sp|Q5H9F3-3|BCORL_HUMAN Isoform 3 of BCL-6 corepressor-like protein 1 OS=Homo sapiens GN=BCORL1;>tr|A0A075B6Q3|A0A075B6Q3_HUMAN BCL-6 corepressor-like protein 1 (Fragment) OS=Homo sapiens GN=BCORL1 PE=1 SV=1;>sp|Q5H9F3-2|BCORL_HUMAN Isoform 2 of BCL-6 cor	BCL-6 corepressor-like protein 1	190.59	1785	1.1015	1.0656	4	0.55749	0.88856	2	3.3	1.8	5	2	54307000	58495000	23540000	44026000
EWSR1/ATF1 fusion;CREB1;CREM;ATF1	>tr|F1JVV5|F1JVV5_HUMAN EWSR1/ATF1 fusion protein type 1 OS=Homo sapiens GN=EWSR1/ATF1 fusion PE=2 SV=1;>tr|Q53RU9|Q53RU9_HUMAN Putative uncharacterized protein CREB1 (Fragment) OS=Homo sapiens GN=CREB1 PE=4 SV=1;>tr|E9PAR2|E9PAR2_HUMAN cAMP-responsive ele	Cyclic AMP-dependent transcription factor ATF-1;Cyclic AMP-responsive element-binding protein 1	57.066	537	1.1835	1.0651	2	NA	NA	1	7.4	6.1	2	1	40098000	31087000	20728000	36626000
CDC5L	>tr|B4DSH1|B4DSH1_HUMAN cDNA FLJ51295, highly similar to Cell division cycle 5-like protein OS=Homo sapiens PE=2 SV=1;>tr|B3KY60|B3KY60_HUMAN cDNA FLJ16777 fis, clone BRHIP2029567, highly similar to Cell division cycle 5-like protein OS=Homo sapiens PE=2 S	Cell division cycle 5-like protein	89.225	775	1.0611	1.0641	22	0.57892	0.9393	22	35.9	35.1	23	22	1238300000	1110900000	907470000	1236600000
TP53	>tr|H2EHT1|H2EHT1_HUMAN Cellular tumor antigen p53 OS=Homo sapiens GN=TP53 PE=2 SV=1;>tr|B4DMH2|B4DMH2_HUMAN Cellular tumor antigen p53 OS=Homo sapiens PE=2 SV=1;>tr|B4DNI2|B4DNI2_HUMAN Cellular tumor antigen p53 OS=Homo sapiens PE=2 SV=1;>tr|Q5U0E4|Q5U0E4	Cellular tumor antigen p53	39.32	354	1.0781	1.0638	2	0.79906	1.2718	2	8.8	5.9	2	2	46263000	41127000	32051000	41422000
NIPBL	>sp|Q6KC79-2|NIPBL_HUMAN Isoform 2 of Nipped-B-like protein OS=Homo sapiens GN=NIPBL;>sp|Q6KC79|NIPBL_HUMAN Nipped-B-like protein OS=Homo sapiens GN=NIPBL PE=1 SV=2;>tr|Q6IEH8|Q6IEH8_HUMAN Transcriptional regulator OS=Homo sapiens GN=NIPBL PE=2 SV=1;>tr|A8	Nipped-B-like protein	304.34	2697	1.122	1.0621	12	0.6165	0.98128	8	6.2	5.3	14	12	284380000	227250000	167780000	361630000
XAB2;DKFZp762C1015	>tr|Q71SV8|Q71SV8_HUMAN Crn-related protein kim1 OS=Homo sapiens PE=2 SV=1;>sp|Q9HCS7|SYF1_HUMAN Pre-mRNA-splicing factor SYF1 OS=Homo sapiens GN=XAB2 PE=1 SV=2;>tr|Q68CN2|Q68CN2_HUMAN Putative uncharacterized protein DKFZp762C1015 (Fragment) OS=Homo sapie	Pre-mRNA-splicing factor SYF1	99.705	852	1.0313	1.0614	33	0.7489	1.2289	33	43.3	51.3	34	37	2369600000	2289400000	1241000000	1680400000
HNRPK;HNRNPK	>tr|A0A024R228|A0A024R228_HUMAN Heterogeneous nuclear ribonucleoprotein K, isoform CRA_d OS=Homo sapiens GN=HNRPK PE=4 SV=1;>tr|Q6IBN1|Q6IBN1_HUMAN HNRPK protein OS=Homo sapiens GN=HNRPK PE=2 SV=1;>sp|P61978|HNRPK_HUMAN Heterogeneous nuclear ribonucleoprot	Heterogeneous nuclear ribonucleoprotein K	51.218	463	1.0258	1.0603	35	0.6087	0.92574	23	57.5	47.9	1	1	9674300000	8770700000	4213200000	6294700000
ZC3H11A	>tr|B4DLG2|B4DLG2_HUMAN cDNA FLJ58196, highly similar to Zinc finger CCCH domain-containing protein 11A OS=Homo sapiens PE=2 SV=1;>sp|O75152|ZC11A_HUMAN Zinc finger CCCH domain-containing protein 11A OS=Homo sapiens GN=ZC3H11A PE=1 SV=3;>tr|E9PQ61|E9PQ61_H	Zinc finger CCCH domain-containing protein 11A	82.771	756	1.0481	1.0593	30	0.6069	0.95437	27	47.6	46.7	30	28	2457800000	2219300000	1712400000	2551400000
FIP1L1	>sp|Q6UN15-5|FIP1_HUMAN Isoform 5 of Pre-mRNA 3-end-processing factor FIP1 OS=Homo sapiens GN=FIP1L1;>sp|Q6UN15|FIP1_HUMAN Pre-mRNA 3-end-processing factor FIP1 OS=Homo sapiens GN=FIP1L1 PE=1 SV=1;>sp|Q6UN15-3|FIP1_HUMAN Isoform 3 of Pre-mRNA 3-end-proc	Pre-mRNA 3-end-processing factor FIP1	65.727	588	1.0672	1.0591	10	0.67833	1.0797	10	21.9	25.7	9	11	655090000	603940000	334480000	475110000
CASC5	>sp|Q8NG31-2|CASC5_HUMAN Isoform 2 of Protein CASC5 OS=Homo sapiens GN=CASC5;>sp|Q8NG31|CASC5_HUMAN Protein CASC5 OS=Homo sapiens GN=CASC5 PE=1 SV=3;>tr|H0YCZ2|H0YCZ2_HUMAN Protein CASC5 (Fragment) OS=Homo sapiens GN=CASC5 PE=1 SV=1;>tr|E9PPJ1|E9PPJ1_HUMAN	Protein CASC5	262.63	2316	1.0989	1.0569	4	0.73564	1.1921	8	2.5	4	4	7	83216000	68129000	118350000	150080000
REXO4	>sp|Q9GZR2|REXO4_HUMAN RNA exonuclease 4 OS=Homo sapiens GN=REXO4 PE=1 SV=2;>tr|B4E331|B4E331_HUMAN cDNA FLJ50372, highly similar to RNA exonuclease 4 (EC 3.1.-.-) OS=Homo sapiens PE=2 SV=1;>tr|B4DJ95|B4DJ95_HUMAN cDNA FLJ55848, highly similar to RNA exonu	RNA exonuclease 4	46.671	422	1.0631	1.0539	8	0.42669	0.68055	10	18.5	22.5	6	8	402170000	354420000	278970000	626630000
BAZ1A	>tr|D3DS96|D3DS96_HUMAN Bromodomain adjacent to zinc finger domain, 1A, isoform CRA_c OS=Homo sapiens GN=BAZ1A PE=4 SV=1;>sp|Q9NRL2|BAZ1A_HUMAN Bromodomain adjacent to zinc finger domain protein 1A OS=Homo sapiens GN=BAZ1A PE=1 SV=2;>sp|Q9NRL2-2|BAZ1A_HUMA	Bromodomain adjacent to zinc finger domain protein 1A	178.57	1555	1.0621	1.0533	34	0.6511	1.0406	37	26.9	27.8	24	26	1934500000	2280000000	1289400000	1812500000
DIDO1	>sp|Q9BTC0|DIDO1_HUMAN Death-inducer obliterator 1 OS=Homo sapiens GN=DIDO1 PE=1 SV=5;>sp|Q9BTC0-1|DIDO1_HUMAN Isoform 1 of Death-inducer obliterator 1 OS=Homo sapiens GN=DIDO1	Death-inducer obliterator 1	243.87	2240	1.0567	1.0529	44	0.48802	0.77825	44	27.8	31	44	45	3480200000	5068000000	2131100000	4238000000
UBA52;UBB;RPS27A;UBC;DKFZp434K0435;UbC;UBBP4	>tr|Q3MIH3|Q3MIH3_HUMAN Ubiquitin A-52 residue ribosomal protein fusion product 1 OS=Homo sapiens GN=UBA52 PE=2 SV=1;>sp|P62987|RL40_HUMAN Ubiquitin-60S ribosomal protein L40 OS=Homo sapiens GN=UBA52 PE=1 SV=2;>tr|M0R2S1|M0R2S1_HUMAN Ubiquitin-60S ribosoma	Ubiquitin-60S ribosomal protein L40;Ubiquitin;60S ribosomal protein L40;Polyubiquitin-B;Ubiquitin;Polyubiquitin-C;Ubiquitin	14.728	128	0.9754	1.0521	5	0.56147	0.8824	9	42.2	45.3	2	2	1060400000	1006900000	935420000	1504300000
crn;DKFZp762M013;CRNKL1	>tr|Q8IXG0|Q8IXG0_HUMAN Crn protein OS=Homo sapiens GN=crn PE=2 SV=1;>tr|Q69YP1|Q69YP1_HUMAN Putative uncharacterized protein DKFZp762M013 (Fragment) OS=Homo sapiens GN=DKFZp762M013 PE=2 SV=1;>tr|Q5JY65|Q5JY65_HUMAN Crooked neck-like protein 1 OS=Homo sapi	Crooked neck-like protein 1	83.138	687	1.0356	1.0519	2	NA	NA	0	3.3	0	2	0	28575000	30987000	0	0
MAZ	>sp|P56270-2|MAZ_HUMAN Isoform 2 of Myc-associated zinc finger protein OS=Homo sapiens GN=MAZ;>tr|Q8IUI2|Q8IUI2_HUMAN MAZ protein OS=Homo sapiens PE=2 SV=1;>sp|P56270-3|MAZ_HUMAN Isoform 3 of Myc-associated zinc finger protein OS=Homo sapiens GN=MAZ;>sp|P5	Myc-associated zinc finger protein	51.072	493	1.0486	1.0498	22	0.54902	0.87929	22	28.6	38.1	12	14	988960000	935900000	894420000	1588200000
KIF23	>tr|H7BYN4|H7BYN4_HUMAN Kinesin-like protein OS=Homo sapiens GN=KIF23 PE=1 SV=1;>sp|Q02241-2|KIF23_HUMAN Isoform 2 of Kinesin-like protein KIF23 OS=Homo sapiens GN=KIF23;>sp|Q02241|KIF23_HUMAN Kinesin-like protein KIF23 OS=Homo sapiens GN=KIF23 PE=1 SV=3;>	Kinesin-like protein KIF23	109.13	952	1.1465	1.0473	7	0.5379	0.82966	6	13.3	11.3	10	8	198040000	179300000	110870000	205400000
MCCC1;DKFZp686B20267	>tr|B4DH16|B4DH16_HUMAN cDNA FLJ54709, highly similar to Methylcrotonoyl-CoA carboxylase subunit alpha, mitochondrial (EC 6.4.1.4) OS=Homo sapiens PE=2 SV=1;>tr|E9PG35|E9PG35_HUMAN Methylcrotonoyl-CoA carboxylase subunit alpha, mitochondrial (Fragment) OS=	Methylcrotonoyl-CoA carboxylase subunit alpha, mitochondrial	47.506	426	1.051	1.0417	3	0.4623	0.76102	3	10.3	9.6	3	3	81098000	64251000	46821000	116020000
CBX1	>tr|J3KS05|J3KS05_HUMAN Chromobox protein homolog 1 (Fragment) OS=Homo sapiens GN=CBX1 PE=1 SV=3;>tr|Q6IBN6|Q6IBN6_HUMAN CBX1 protein OS=Homo sapiens GN=CBX1 PE=2 SV=1;>sp|P83916|CBX1_HUMAN Chromobox protein homolog 1 OS=Homo sapiens GN=CBX1 PE=1 SV=1;>tr|	Chromobox protein homolog 1	20.127	174	1.0092	1.0404	7	0.53736	0.98766	5	37.4	31	6	4	1490800000	1363700000	471900000	792810000
NOC3L	>tr|A8K905|A8K905_HUMAN cDNA FLJ77615, highly similar to Homo sapiens nucleolar complex associated 3 homolog (S. cerevisiae) (NOC3L), mRNA OS=Homo sapiens PE=2 SV=1;>sp|Q8WTT2|NOC3L_HUMAN Nucleolar complex protein 3 homolog OS=Homo sapiens GN=NOC3L PE=1 SV	Nucleolar complex protein 3 homolog	92.548	800	1.1585	1.0401	2	NA	NA	0	3.5	0	2	0	32249000	20833000	0	0
NCOA6	>sp|Q14686|NCOA6_HUMAN Nuclear receptor coactivator 6 OS=Homo sapiens GN=NCOA6 PE=1 SV=3;>tr|F6M2K3|F6M2K3_HUMAN Nuclear receptor coactivator-6 gamma OS=Homo sapiens GN=NCOA6 PE=2 SV=1	Nuclear receptor coactivator 6	219.14	2063	1.0379	1.0399	9	0.7961	1.1788	5	6.1	4.2	10	6	302220000	322820000	175260000	238440000
RPS12	>sp|P25398|RS12_HUMAN 40S ribosomal protein S12 OS=Homo sapiens GN=RPS12 PE=1 SV=3	40S ribosomal protein S12	14.515	132	1.111	1.0392	9	0.75834	1.1562	10	53.8	70.5	7	7	424980000	396860000	517800000	599330000
ZNF553;ZNF48	>tr|A0A087WVT1|A0A087WVT1_HUMAN Zinc finger protein 48 OS=Homo sapiens GN=ZNF48 PE=1 SV=1;>tr|A0A024QZB9|A0A024QZB9_HUMAN Zinc finger protein 553, isoform CRA_a OS=Homo sapiens GN=ZNF553 PE=4 SV=1;>sp|Q96MX3|ZNF48_HUMAN Zinc finger protein 48 OS=Homo sapie	Zinc finger protein 48	53.987	495	1.04	1.0375	2	0.44007	0.68642	2	7.9	8.5	1	1	12042000	10659000	7443500	13571000
ZNF512B	>sp|Q96KM6|Z512B_HUMAN Zinc finger protein 512B OS=Homo sapiens GN=ZNF512B PE=1 SV=1	Zinc finger protein 512B	97.263	892	1.177	1.0369	7	0.39916	0.68285	8	10.4	18.5	8	11	188980000	171460000	128110000	291110000
HEL-S-123m;ATP5A1	>tr|V9HW26|V9HW26_HUMAN ATP synthase subunit alpha OS=Homo sapiens GN=HEL-S-123m PE=2 SV=1;>sp|P25705-2|ATPA_HUMAN Isoform 2 of ATP synthase subunit alpha, mitochondrial OS=Homo sapiens GN=ATP5A1;>sp|P25705|ATPA_HUMAN ATP synthase subunit alpha, mitochondr	ATP synthase subunit alpha;ATP synthase subunit alpha, mitochondrial	59.75	553	1.1152	1.0364	5	0.52519	0.84984	5	15.6	14.1	7	7	155070000	160970000	132520000	263080000
RRP8	>tr|E9PPY3|E9PPY3_HUMAN Ribosomal RNA-processing protein 8 OS=Homo sapiens GN=RRP8 PE=1 SV=1;>sp|O43159|RRP8_HUMAN Ribosomal RNA-processing protein 8 OS=Homo sapiens GN=RRP8 PE=1 SV=2	Ribosomal RNA-processing protein 8	34.2	306	1.0171	1.0354	2	NA	NA	1	7.5	5.2	2	1	41581000	42409000	11153000	25291000
CHAF1A	>tr|D6W625|D6W625_HUMAN Chromatin assembly factor 1, subunit A (P150), isoform CRA_a OS=Homo sapiens GN=CHAF1A PE=4 SV=1;>sp|Q13111|CAF1A_HUMAN Chromatin assembly factor 1 subunit A OS=Homo sapiens GN=CHAF1A PE=1 SV=2;>sp|Q13111-3|CAF1A_HUMAN Isoform 3 of	Chromatin assembly factor 1 subunit A	106.94	956	1.0497	1.0347	13	0.43638	0.67067	9	21.8	18.4	15	12	486520000	399050000	151590000	332180000
PEF1	>sp|Q9UBV8|PEF1_HUMAN Peflin OS=Homo sapiens GN=PEF1 PE=1 SV=1	Peflin	30.381	284	0.96305	1.0302	3	0.58084	0.94855	5	12	12	3	4	70813000	70177000	130350000	218360000
TAF9;AK6	>sp|Q16594|TAF9_HUMAN Transcription initiation factor TFIID subunit 9 OS=Homo sapiens GN=TAF9 PE=1 SV=1;>tr|D6RGK3|D6RGK3_HUMAN Adenylate kinase isoenzyme 6 (Fragment) OS=Homo sapiens GN=AK6 PE=4 SV=3;>tr|D6RIV9|D6RIV9_HUMAN Adenylate kinase isoenzyme 6 (F	Transcription initiation factor TFIID subunit 9	28.974	264	1.1041	1.0299	3	0.69004	1.0943	2	31.1	23.9	3	2	30758000	33431000	25195000	35118000
XRCC6	>tr|B1AHC9|B1AHC9_HUMAN X-ray repair cross-complementing protein 6 OS=Homo sapiens GN=XRCC6 PE=1 SV=1;>tr|A0A024R1N4|A0A024R1N4_HUMAN X-ray repair complementing defective repair in Chinese hamster cells 6 (Ku autoantigen, 70kDa), isoform CRA_a OS=Homo sapi	X-ray repair cross-complementing protein 6	64.283	559	1.0773	1.0293	9	0.52914	0.83841	8	21.3	23.1	9	9	276660000	255650000	157080000	260840000
ATAD2B	>sp|Q9ULI0-2|ATD2B_HUMAN Isoform 2 of ATPase family AAA domain-containing protein 2B OS=Homo sapiens GN=ATAD2B;>sp|Q9ULI0|ATD2B_HUMAN ATPase family AAA domain-containing protein 2B OS=Homo sapiens GN=ATAD2B PE=1 SV=3;>tr|H7BYF1|H7BYF1_HUMAN ATPase family A	ATPase family AAA domain-containing protein 2B	164.33	1453	1.1187	1.0291	4	0.60238	0.99484	5	7.2	5.9	10	8	293060000	231840000	127180000	186160000
INCENP	>sp|Q9NQS7-2|INCE_HUMAN Isoform 2 of Inner centromere protein OS=Homo sapiens GN=INCENP;>sp|Q9NQS7|INCE_HUMAN Inner centromere protein OS=Homo sapiens GN=INCENP PE=1 SV=3;>tr|B3KPD3|B3KPD3_HUMAN cDNA FLJ31633 fis, clone NT2RI2003407, highly similar to Inne	Inner centromere protein	104.99	914	1.08	1.0288	4	0.25665	0.37708	6	6.7	10.5	5	8	98249000	96538000	72117000	166260000
HNRNPC;hCG_1641229;HNRPCL1;LOC649330;HNRNPCL1;HNRNPCL2	>tr|G3V576|G3V576_HUMAN Heterogeneous nuclear ribonucleoproteins C1/C2 OS=Homo sapiens GN=HNRNPC PE=1 SV=1;>tr|G3V4W0|G3V4W0_HUMAN Heterogeneous nuclear ribonucleoproteins C1/C2 (Fragment) OS=Homo sapiens GN=HNRNPC PE=1 SV=1;>tr|B4DY08|B4DY08_HUMAN Heterog	Heterogeneous nuclear ribonucleoproteins C1/C2;Heterogeneous nuclear ribonucleoprotein C-like 1;Heterogeneous nuclear ribonucleoprotein C-like 2	25.256	231	0.96504	1.0288	10	0.69714	1.1505	11	33.8	41.1	9	10	994720000	1128200000	694880000	897680000
NCOR1;DKFZp434M075	>tr|Q7Z516|Q7Z516_HUMAN Nuclear receptor co-repressor OS=Homo sapiens PE=2 SV=1;>tr|A0A088AWL3|A0A088AWL3_HUMAN Nuclear receptor corepressor 1 OS=Homo sapiens GN=NCOR1 PE=1 SV=1;>tr|A0A024RD47|A0A024RD47_HUMAN Nuclear receptor co-repressor 1, isoform CRA_a	Nuclear receptor corepressor 1	258.88	2343	1.0179	1.0286	3	0.9271	1.4687	6	2.3	3.2	4	5	71787000	57582000	105470000	84674000
VDAC2	>tr|A0A0A0MR02|A0A0A0MR02_HUMAN Voltage-dependent anion-selective channel protein 2 (Fragment) OS=Homo sapiens GN=VDAC2 PE=4 SV=1;>tr|A0A024QZT0|A0A024QZT0_HUMAN Voltage-dependent anion channel 2, isoform CRA_c OS=Homo sapiens GN=VDAC2 PE=4 SV=1;>tr|A0A024	Voltage-dependent anion-selective channel protein 2	30.348	282	1.0877	1.0275	9	0.64087	1.0225	5	35.1	32.3	9	8	287840000	245060000	165050000	245110000
HMGXB4	>tr|Q2M3X1|Q2M3X1_HUMAN HMGXB4 protein OS=Homo sapiens GN=HMGXB4 PE=2 SV=1;>tr|B4DSN8|B4DSN8_HUMAN cDNA FLJ60863, highly similar to High mobility group protein 2-like 1 OS=Homo sapiens PE=2 SV=1;>sp|Q9UGU5|HMGX4_HUMAN HMG domain-containing protein 4 OS=Hom	HMG domain-containing protein 4	53.173	492	1.0436	1.0261	10	0.50176	0.78731	7	24.6	22.2	7	7	692030000	628390000	423540000	830570000
NPAT	>tr|B9EG70|B9EG70_HUMAN Nuclear protein, ataxia-telangiectasia locus OS=Homo sapiens GN=NPAT PE=2 SV=1;>sp|Q14207|NPAT_HUMAN Protein NPAT OS=Homo sapiens GN=NPAT PE=1 SV=3	Protein NPAT	154.32	1427	1.1362	1.0256	6	0.47977	0.81627	4	4.8	6.5	6	7	120780000	105040000	67220000	120880000
MAP7D3	>sp|Q8IWC1-2|MA7D3_HUMAN Isoform 2 of MAP7 domain-containing protein 3 OS=Homo sapiens GN=MAP7D3;>sp|Q8IWC1|MA7D3_HUMAN MAP7 domain-containing protein 3 OS=Homo sapiens GN=MAP7D3 PE=1 SV=2;>tr|A0A0A0MRP0|A0A0A0MRP0_HUMAN MAP7 domain-containing protein 3 (F	MAP7 domain-containing protein 3	93.784	835	1.0985	1.025	11	0.7689	1.2192	11	15.1	13.4	11	11	477590000	391160000	356980000	409190000
NOLC1	>tr|A0A0A0MRM9|A0A0A0MRM9_HUMAN Nucleolar and coiled-body phosphoprotein 1 (Fragment) OS=Homo sapiens GN=NOLC1 PE=4 SV=1;>sp|Q14978-2|NOLC1_HUMAN Isoform Beta of Nucleolar and coiled-body phosphoprotein 1 OS=Homo sapiens GN=NOLC1;>tr|B2RAU8|B2RAU8_HUMAN cD	Nucleolar and coiled-body phosphoprotein 1	74.543	708	1.0402	1.0235	25	0.52435	0.82413	26	31.2	24.7	1	1	2885000000	2689200000	1614400000	2867100000
PRPF31	>tr|E7ESA8|E7ESA8_HUMAN U4/U6 small nuclear ribonucleoprotein Prp31 OS=Homo sapiens GN=PRPF31 PE=1 SV=2;>tr|E7EVX8|E7EVX8_HUMAN U4/U6 small nuclear ribonucleoprotein Prp31 OS=Homo sapiens GN=PRPF31 PE=1 SV=1;>tr|F1T0A5|F1T0A5_HUMAN PRP31 pre-mRNA processin	U4/U6 small nuclear ribonucleoprotein Prp31	54.909	491	1.1847	1.0227	4	0.57661	0.91053	3	10.2	8.4	4	3	45976000	41188000	20512000	36949000
BBX	>tr|A8K6U2|A8K6U2_HUMAN cDNA FLJ78675, highly similar to Homo sapiens stroma HMG-box containing protein (HBP2) mRNA OS=Homo sapiens PE=2 SV=1;>sp|Q8WY36-2|BBX_HUMAN Isoform 2 of HMG box transcription factor BBX OS=Homo sapiens GN=BBX;>sp|Q8WY36|BBX_HUMAN H	HMG box transcription factor BBX	105.13	941	0.99734	1.0207	14	0.48931	0.80419	7	20.1	17.6	16	13	751950000	469910000	583140000	473130000
HNRNPA0	>sp|Q13151|ROA0_HUMAN Heterogeneous nuclear ribonucleoprotein A0 OS=Homo sapiens GN=HNRNPA0 PE=1 SV=1	Heterogeneous nuclear ribonucleoprotein A0	30.84	305	0.98397	1.0195	8	0.76438	1.174	8	31.1	26.9	8	7	1052400000	1019400000	963750000	1190700000
PCF11	>sp|O94913|PCF11_HUMAN Pre-mRNA cleavage complex 2 protein Pcf11 OS=Homo sapiens GN=PCF11 PE=1 SV=3;>tr|E9PKN0|E9PKN0_HUMAN Pre-mRNA cleavage complex 2 protein Pcf11 (Fragment) OS=Homo sapiens GN=PCF11 PE=1 SV=1;>tr|B7Z7X4|B7Z7X4_HUMAN cDNA FLJ61740, highl	Pre-mRNA cleavage complex 2 protein Pcf11	173.05	1555	0.96248	1.0184	12	0.77507	1.237	6	9.7	6.7	12	8	226810000	237880000	107240000	121560000
UTP11L	>sp|Q9Y3A2|UTP11_HUMAN Probable U3 small nucleolar RNA-associated protein 11 OS=Homo sapiens GN=UTP11L PE=1 SV=2;>sp|Q9Y3A2-2|UTP11_HUMAN Isoform 2 of Probable U3 small nucleolar RNA-associated protein 11 OS=Homo sapiens GN=UTP11L	Probable U3 small nucleolar RNA-associated protein 11	30.446	253	1.0909	1.0174	3	0.57566	0.9199	3	13.4	9.9	4	3	96888000	72007000	42865000	71589000
JMJD1C	>tr|B7ZLC8|B7ZLC8_HUMAN JMJD1C protein OS=Homo sapiens GN=JMJD1C PE=2 SV=1;>sp|Q15652-3|JHD2C_HUMAN Isoform 3 of Probable JmjC domain-containing histone demethylation protein 2C OS=Homo sapiens GN=JMJD1C;>sp|Q15652|JHD2C_HUMAN Probable JmjC domain-containi	Probable JmjC domain-containing histone demethylation protein 2C	263.15	2358	1.0144	1.0163	45	0.6101	0.95691	39	22.5	19.9	41	37	2444500000	2165600000	1581300000	2225900000
XRCC5	>sp|P13010|XRCC5_HUMAN X-ray repair cross-complementing protein 5 OS=Homo sapiens GN=XRCC5 PE=1 SV=3;>tr|Q53T09|Q53T09_HUMAN Putative uncharacterized protein XRCC5 (Fragment) OS=Homo sapiens GN=XRCC5 PE=4 SV=1	X-ray repair cross-complementing protein 5	82.704	732	1.1255	1.0159	4	0.63946	1.0109	5	13.8	6.8	7	5	127280000	103550000	79620000	119810000
DHX15	>sp|O43143|DHX15_HUMAN Putative pre-mRNA-splicing factor ATP-dependent RNA helicase DHX15 OS=Homo sapiens GN=DHX15 PE=1 SV=2;>tr|B4E0S6|B4E0S6_HUMAN cDNA FLJ55635, highly similar to pre-mRNA-splicing factorATP-dependent RNA helicase DHX15 (EC 3.6.1.-) OS=H	Putative pre-mRNA-splicing factor ATP-dependent RNA helicase DHX15	90.932	795	0.97151	1.0155	7	0.69208	1.1006	7	14	12.3	9	8	462020000	246630000	262090000	252080000
ZNF174	>tr|Q8IZN5|Q8IZN5_HUMAN Truncated zinc finger protein isoform OS=Homo sapiens GN=ZNF174 PE=2 SV=1;>tr|I3L2H2|I3L2H2_HUMAN Zinc finger protein 174 OS=Homo sapiens GN=ZNF174 PE=4 SV=1;>sp|Q15697-2|ZN174_HUMAN Isoform 2 of Zinc finger protein 174 OS=Homo sapi	Zinc finger protein 174	24.051	208	1.0558	1.0152	2	NA	NA	1	14.9	4.8	3	1	36292000	30996000	5677400	15596000
RPS27L;LOC392748;RPS27	>tr|H0YMV8|H0YMV8_HUMAN 40S ribosomal protein S27 OS=Homo sapiens GN=RPS27L PE=1 SV=1;>tr|A4D1G5|A4D1G5_HUMAN 40S ribosomal protein S27 OS=Homo sapiens GN=LOC392748 PE=3 SV=1;>sp|Q71UM5|RS27L_HUMAN 40S ribosomal protein S27-like OS=Homo sapiens GN=RPS27L P	40S ribosomal protein S27;40S ribosomal protein S27-like	11.345	100	1.071	1.0143	2	0.77882	1.2606	2	21	21	2	2	40741000	37801000	37324000	46993000
SF3B2;DKFZp781L0540	>sp|Q13435|SF3B2_HUMAN Splicing factor 3B subunit 2 OS=Homo sapiens GN=SF3B2 PE=1 SV=2;>tr|A0A087WZZ5|A0A087WZZ5_HUMAN Splicing factor 3B subunit 2 OS=Homo sapiens GN=SF3B2 PE=1 SV=1;>tr|E9PPJ0|E9PPJ0_HUMAN Splicing factor 3B subunit 2 OS=Homo sapiens GN=S	Splicing factor 3B subunit 2	100.23	895	0.99612	1.0138	30	0.71358	1.1777	27	32.5	31.7	25	24	2279000000	2354700000	1430700000	1886500000
EEF1G	>tr|Q53YD7|Q53YD7_HUMAN EEF1G protein OS=Homo sapiens GN=EEF1G PE=2 SV=1;>sp|P26641|EF1G_HUMAN Elongation factor 1-gamma OS=Homo sapiens GN=EEF1G PE=1 SV=3;>sp|P26641-2|EF1G_HUMAN Isoform 2 of Elongation factor 1-gamma OS=Homo sapiens GN=EEF1G;>tr|B4DUP0|B	Elongation factor 1-gamma	50.118	437	0.98093	1.0107	4	0.64255	1.0103	5	8.7	15.3	4	6	134890000	143370000	217360000	286860000
DEAF1	>sp|O75398-5|DEAF1_HUMAN Isoform 4 of Deformed epidermal autoregulatory factor 1 homolog OS=Homo sapiens GN=DEAF1;>sp|O75398-4|DEAF1_HUMAN Isoform 3 of Deformed epidermal autoregulatory factor 1 homolog OS=Homo sapiens GN=DEAF1;>sp|O75398-3|DEAF1_HUMAN Iso	Deformed epidermal autoregulatory factor 1 homolog	51.276	490	1.0439	1.0099	2	0.32661	0.52554	2	5.7	5.7	2	2	88100000	72388000	29124000	71450000
SCML2	>sp|Q9UQR0|SCML2_HUMAN Sex comb on midleg-like protein 2 OS=Homo sapiens GN=SCML2 PE=1 SV=1;>tr|B4DZR9|B4DZR9_HUMAN cDNA FLJ54781, highly similar to Sex comb on midleg-like protein 2 OS=Homo sapiens PE=2 SV=1	Sex comb on midleg-like protein 2	77.256	700	1.0336	1.0098	47	0.46901	0.72565	48	68.4	72.9	37	40	8086200000	7546800000	4543500000	10133000000
PUF60	>sp|Q9UHX1-4|PUF60_HUMAN Isoform 4 of Poly(U)-binding-splicing factor PUF60 OS=Homo sapiens GN=PUF60;>sp|Q9UHX1-6|PUF60_HUMAN Isoform 6 of Poly(U)-binding-splicing factor PUF60 OS=Homo sapiens GN=PUF60;>sp|Q9UHX1-3|PUF60_HUMAN Isoform 3 of Poly(U)-binding-	Poly(U)-binding-splicing factor PUF60	54.024	499	1.0663	1.0085	4	0.74679	1.2369	2	9	5.4	5	3	56589000	57604000	26153000	30029000
FOXC1	>tr|W6CJ52|W6CJ52_HUMAN Forkhead box C1 OS=Homo sapiens GN=FOXC1 PE=4 SV=1;>tr|C6KMR8|C6KMR8_HUMAN Forkhead box C1 OS=Homo sapiens GN=FOXC1 PE=4 SV=1;>sp|Q12948|FOXC1_HUMAN Forkhead box protein C1 OS=Homo sapiens GN=FOXC1 PE=1 SV=3;>tr|A3KPE3|A3KPE3_HUMAN	Forkhead box protein C1	56.788	553	1.086	1.0056	2	0.33667	0.54047	3	5.6	10.7	3	3	93138000	89238000	80528000	206890000
HDGFRP2	>sp|Q7Z4V5-2|HDGR2_HUMAN Isoform 2 of Hepatoma-derived growth factor-related protein 2 OS=Homo sapiens GN=HDGFRP2;>sp|Q7Z4V5|HDGR2_HUMAN Hepatoma-derived growth factor-related protein 2 OS=Homo sapiens GN=HDGFRP2 PE=1 SV=1;>sp|Q7Z4V5-4|HDGR2_HUMAN Isoform	Hepatoma-derived growth factor-related protein 2	74.229	670	1.1189	1.0047	3	0.4063	0.6322	5	8.5	9	3	3	235710000	219400000	158590000	337950000
TCEA1;TCEA2	>sp|P23193|TCEA1_HUMAN Transcription elongation factor A protein 1 OS=Homo sapiens GN=TCEA1 PE=1 SV=2;>tr|B7Z4S1|B7Z4S1_HUMAN Transcription elongation factor A protein 1 OS=Homo sapiens GN=TCEA1 PE=1 SV=1;>tr|A0A0A0MT58|A0A0A0MT58_HUMAN Transcription elong	Transcription elongation factor A protein 1;Transcription elongation factor A protein 2	33.969	301	0.97305	1.0019	2	0.58524	0.96388	3	7.6	12	2	3	48622000	51581000	55033000	100720000
EIF2S2	>tr|Q96I16|Q96I16_HUMAN EIF2S2 protein OS=Homo sapiens PE=2 SV=1;>tr|Q6IBR8|Q6IBR8_HUMAN EIF2S2 protein OS=Homo sapiens GN=EIF2S2 PE=2 SV=1;>tr|B5BU01|B5BU01_HUMAN Eukaryotic translation initiation factor 2 beta OS=Homo sapiens GN=EIF2S2 PE=2 SV=1;>sp|P200	Eukaryotic translation initiation factor 2 subunit 2	24.575	214	0.98551	1.0019	5	0.71734	1.1428	5	17.3	23.4	4	6	124110000	110820000	111830000	147090000
RCL1	>sp|Q9Y2P8|RCL1_HUMAN RNA 3-terminal phosphate cyclase-like protein OS=Homo sapiens GN=RCL1 PE=1 SV=3	RNA 3-terminal phosphate cyclase-like protein	40.842	373	0.98288	0.99932	3	0.50905	0.81171	3	13.7	10.5	4	3	84734000	63028000	20540000	42900000
RUVBL1	>tr|B5BUB1|B5BUB1_HUMAN RuvB-like 1 (Fragment) OS=Homo sapiens GN=RUVBL1 PE=2 SV=1;>sp|Q9Y265|RUVB1_HUMAN RuvB-like 1 OS=Homo sapiens GN=RUVBL1 PE=1 SV=1;>sp|Q9Y265-2|RUVB1_HUMAN Isoform 2 of RuvB-like 1 OS=Homo sapiens GN=RUVBL1;>tr|E7ETR0|E7ETR0_HUMAN Ru	RuvB-like 1	50.215	456	1.0661	0.99893	23	0.6065	0.91685	18	44.3	47.8	16	17	2705000000	2472600000	1824100000	2853300000
LUZP1	>tr|A0A024RAC0|A0A024RAC0_HUMAN Leucine zipper protein 1, isoform CRA_a OS=Homo sapiens GN=LUZP1 PE=4 SV=1;>sp|Q86V48-2|LUZP1_HUMAN Isoform 2 of Leucine zipper protein 1 OS=Homo sapiens GN=LUZP1;>sp|Q86V48-3|LUZP1_HUMAN Isoform 3 of Leucine zipper protein	Leucine zipper protein 1	120.3	1076	0.98515	0.99882	2	NA	NA	1	2.4	1.3	2	1	27888000	32804000	8900400	11148000
HOXB9	>sp|P17482|HXB9_HUMAN Homeobox protein Hox-B9 OS=Homo sapiens GN=HOXB9 PE=1 SV=2	Homeobox protein Hox-B9	28.058	250	0.99261	0.99863	3	NA	NA	1	11.2	11.2	3	2	55332000	42638000	10901000	67604000
CCDC72;TMA7	>tr|A0A024R306|A0A024R306_HUMAN Coiled-coil domain containing 72, isoform CRA_a OS=Homo sapiens GN=CCDC72 PE=4 SV=1;>sp|Q9Y2S6|TMA7_HUMAN Translation machinery-associated protein 7 OS=Homo sapiens GN=TMA7 PE=1 SV=1	Translation machinery-associated protein 7	7.0662	64	0.89251	0.99775	17	0.65468	1.2983	11	53.1	40.6	7	6	5912700000	5800300000	5581100000	6845100000
MED1	>sp|Q15648|MED1_HUMAN Mediator of RNA polymerase II transcription subunit 1 OS=Homo sapiens GN=MED1 PE=1 SV=4;>tr|B2RAG9|B2RAG9_HUMAN cDNA, FLJ94908, highly similar to Homo sapiens PPAR binding protein (PPARBP), mRNA OS=Homo sapiens PE=2 SV=1;>tr|B4DSK7|B4	Mediator of RNA polymerase II transcription subunit 1	168.48	1581	1.0635	0.99736	15	0.7557	1.2278	17	12.9	16.3	16	19	437370000	425910000	402780000	524120000
RPS4X	>tr|Q96IR1|Q96IR1_HUMAN RPS4X protein (Fragment) OS=Homo sapiens GN=RPS4X PE=2 SV=2;>tr|B2R491|B2R491_HUMAN 40S ribosomal protein S4 OS=Homo sapiens GN=RPS4X PE=2 SV=1;>sp|P62701|RS4X_HUMAN 40S ribosomal protein S4, X isoform OS=Homo sapiens GN=RPS4X PE=1	40S ribosomal protein S4;40S ribosomal protein S4, X isoform	27.259	243	1.0172	0.99723	8	0.64338	1.0249	12	35	42.8	8	11	259560000	255090000	208040000	314840000
GLTSCR2	>tr|B4E013|B4E013_HUMAN cDNA FLJ57014, highly similar to Glioma tumor suppressor candidate region gene 2 protein OS=Homo sapiens PE=2 SV=1;>tr|B4DND9|B4DND9_HUMAN cDNA FLJ58318, highly similar to Glioma tumor suppressor candidate region gene 2 protein OS=H	Glioma tumor suppressor candidate region gene 2 protein	40.814	369	0.89718	0.99723	5	NA	NA	1	15.4	4.9	4	1	182170000	192800000	2948100	10886000
RFX1	>sp|P22670|RFX1_HUMAN MHC class II regulatory factor RFX1 OS=Homo sapiens GN=RFX1 PE=1 SV=2	MHC class II regulatory factor RFX1	104.76	979	1.0644	0.99387	4	NA	NA	1	4.6	1.2	4	1	54865000	57359000	13526000	21317000
PHB;HEL-S-54e	>tr|A8K401|A8K401_HUMAN Prohibitin, isoform CRA_a OS=Homo sapiens GN=PHB PE=2 SV=1;>sp|P35232|PHB_HUMAN Prohibitin OS=Homo sapiens GN=PHB PE=1 SV=1;>tr|C9JW96|C9JW96_HUMAN Prohibitin (Fragment) OS=Homo sapiens GN=PHB PE=1 SV=2;>tr|Q6FHP5|Q6FHP5_HUMAN PHB p	Prohibitin	29.804	272	0.97148	0.99064	7	0.55385	0.95936	11	39	53.3	8	10	305360000	287210000	304310000	455590000
SFRS4;SRSF6;SRSF4;HEL-S-91	>tr|Q59GY3|Q59GY3_HUMAN Arginine/serine-rich splicing factor 6 variant (Fragment) OS=Homo sapiens PE=2 SV=1;>tr|A8K588|A8K588_HUMAN cDNA FLJ76823, highly similar to Homo sapiens splicing factor, arginine/serine-rich 6 (SFRS6), mRNA OS=Homo sapiens PE=2 SV=	Serine/arginine-rich splicing factor 6;Serine/arginine-rich splicing factor 4	31.865	279	0.98417	0.98926	3	NA	NA	1	10	3.2	3	1	98912000	89648000	49594000	181200000
ISY1	>sp|Q9ULR0|ISY1_HUMAN Pre-mRNA-splicing factor ISY1 homolog OS=Homo sapiens GN=ISY1 PE=1 SV=3;>sp|Q9ULR0-2|ISY1_HUMAN Isoform 1 of Pre-mRNA-splicing factor ISY1 homolog OS=Homo sapiens GN=ISY1;>sp|Q9ULR0-1|ISY1_HUMAN Isoform 2 of Pre-mRNA-splicing factor I	Pre-mRNA-splicing factor ISY1 homolog	32.992	285	0.96433	0.98904	2	NA	NA	1	9.5	4.9	2	1	43908000	42056000	23483000	29048000
CKS1B	>tr|Q5T179|Q5T179_HUMAN Cyclin-dependent kinases regulatory subunit OS=Homo sapiens GN=CKS1B PE=1 SV=1;>tr|Q5T178|Q5T178_HUMAN Cyclin-dependent kinases regulatory subunit OS=Homo sapiens GN=CKS1B PE=2 SV=1;>sp|P61024|CKS1_HUMAN Cyclin-dependent kinases reg	Cyclin-dependent kinases regulatory subunit;Cyclin-dependent kinases regulatory subunit 1	8.027	67	0.91558	0.9867	2	0.85309	1.3979	3	38.8	38.8	2	2	65718000	66163000	78773000	90916000
FAM76B	>tr|F5GX09|F5GX09_HUMAN Protein FAM76B OS=Homo sapiens GN=FAM76B PE=1 SV=1;>sp|Q5HYJ3|FA76B_HUMAN Protein FAM76B OS=Homo sapiens GN=FAM76B PE=1 SV=3;>sp|Q5HYJ3-3|FA76B_HUMAN Isoform 3 of Protein FAM76B OS=Homo sapiens GN=FAM76B;>sp|Q5HYJ3-2|FA76B_HUMAN Iso	Protein FAM76B	38.62	338	1.0543	0.98553	4	0.69279	1.1019	3	18.6	9.5	5	3	72930000	64289000	50077000	82531000
SGOL2	>tr|B7Z7S9|B7Z7S9_HUMAN cDNA FLJ61724, highly similar to Shugoshin-like 2 OS=Homo sapiens PE=2 SV=1;>sp|Q562F6-2|SGOL2_HUMAN Isoform 2 of Shugoshin-like 2 OS=Homo sapiens GN=SGOL2;>sp|Q562F6|SGOL2_HUMAN Shugoshin-like 2 OS=Homo sapiens GN=SGOL2 PE=1 SV=2	Shugoshin-like 2	143.97	1260	1.1318	0.98529	2	NA	NA	1	1.8	1.3	2	1	11858000	11457000	8592100	10292000
C5orf24	>sp|Q7Z6I8|CE024_HUMAN UPF0461 protein C5orf24 OS=Homo sapiens GN=C5orf24 PE=1 SV=1;>sp|Q7Z6I8-2|CE024_HUMAN Isoform 2 of UPF0461 protein C5orf24 OS=Homo sapiens GN=C5orf24	UPF0461 protein C5orf24	20.132	188	0.99793	0.98486	2	0.36678	0.61218	3	13.3	24.5	2	3	36426000	26346000	44050000	90540000
DDX5;DKFZp686J01190	>sp|P17844|DDX5_HUMAN Probable ATP-dependent RNA helicase DDX5 OS=Homo sapiens GN=DDX5 PE=1 SV=1;>tr|J3KTA4|J3KTA4_HUMAN Probable ATP-dependent RNA helicase DDX5 OS=Homo sapiens GN=DDX5 PE=1 SV=1;>tr|B5BUE6|B5BUE6_HUMAN ATP-dependent RNA helicase DDX5 (Fra	Probable ATP-dependent RNA helicase DDX5	69.147	614	0.98884	0.98228	35	0.8025	1.2298	32	46.3	44	22	19	4213900000	4028700000	4608900000	5405800000
PRPF40A	>sp|O75400-2|PR40A_HUMAN Isoform 2 of Pre-mRNA-processing factor 40 homolog A OS=Homo sapiens GN=PRPF40A;>sp|O75400-3|PR40A_HUMAN Isoform 3 of Pre-mRNA-processing factor 40 homolog A OS=Homo sapiens GN=PRPF40A;>sp|O75400|PR40A_HUMAN Pre-mRNA-processing fac	Pre-mRNA-processing factor 40 homolog A	105.93	930	1.0738	0.98199	3	0.82818	1.2816	4	4.9	5.9	4	5	177150000	151920000	131620000	169280000
DKFZp781C0423;RBM39;DKFZp686A11192;RNPC2;DKFZp686C17209;DKFZp781I1140	>tr|B4DRA0|B4DRA0_HUMAN cDNA FLJ58459, highly similar to RNA-binding region-containing protein 2 OS=Homo sapiens PE=2 SV=1;>tr|B4DLM0|B4DLM0_HUMAN cDNA FLJ60296, highly similar to RNA-binding region-containing protein 2 OS=Homo sapiens PE=2 SV=1;>tr|B3KWX7	RNA-binding protein 39	56.41	502	1.0035	0.98159	10	0.66769	1.0736	11	27.3	30.5	11	12	466600000	489660000	482510000	676440000
PNN	>sp|Q9H307|PININ_HUMAN Pinin OS=Homo sapiens GN=PNN PE=1 SV=4;>tr|A8K964|A8K964_HUMAN cDNA FLJ75071, highly similar to Homo sapiens pinin, desmosome associated protein (PNN), mRNA OS=Homo sapiens PE=2 SV=1;>sp|Q9H307-2|PININ_HUMAN Isoform 2 of Pinin OS=Hom	Pinin	81.613	717	0.96975	0.97921	40	1.1106	1.7999	26	36.5	30.5	29	22	6857300000	6816100000	3654900000	3338500000
NOP56	>sp|O00567|NOP56_HUMAN Nucleolar protein 56 OS=Homo sapiens GN=NOP56 PE=1 SV=4;>tr|A8K9K6|A8K9K6_HUMAN cDNA FLJ76962, highly similar to Homo sapiens nucleolar protein 5A (56kDa with KKE/D repeat) (NOL5A), mRNA OS=Homo sapiens PE=2 SV=1;>tr|A0PJ92|A0PJ92_HU	Nucleolar protein 56	66.049	594	0.98351	0.97874	34	0.6302	0.98974	24	55.9	49.3	26	24	2251200000	2169900000	1478700000	2052600000
PA2G4	>tr|A8K6Y1|A8K6Y1_HUMAN cDNA FLJ75526, highly similar to Homo sapiens proliferation-associated 2G4, 38kDa (PA2G4), mRNA (Fragment) OS=Homo sapiens PE=2 SV=1;>tr|Q6PIN5|Q6PIN5_HUMAN PA2G4 protein (Fragment) OS=Homo sapiens GN=PA2G4 PE=2 SV=1;>tr|A0A024RB85|	Proliferation-associated protein 2G4	40.911	367	0.96497	0.97775	3	0.84549	1.3857	3	19.9	19.1	5	5	112890000	147180000	111090000	167460000
RAI1	>sp|Q7Z5J4|RAI1_HUMAN Retinoic acid-induced protein 1 OS=Homo sapiens GN=RAI1 PE=1 SV=2;>sp|Q7Z5J4-2|RAI1_HUMAN Isoform 2 of Retinoic acid-induced protein 1 OS=Homo sapiens GN=RAI1;>sp|Q7Z5J4-3|RAI1_HUMAN Isoform 3 of Retinoic acid-induced protein 1 OS=Hom	Retinoic acid-induced protein 1	203.35	1906	0.96802	0.97773	20	0.5555	0.84163	12	15.7	17.7	20	21	741200000	754430000	589280000	1079800000
L3MBTL3	>tr|A8K2F4|A8K2F4_HUMAN cDNA FLJ75620 OS=Homo sapiens PE=2 SV=1;>sp|Q96JM7-2|LMBL3_HUMAN Isoform 2 of Lethal(3)malignant brain tumor-like protein 3 OS=Homo sapiens GN=L3MBTL3;>sp|Q96JM7|LMBL3_HUMAN Lethal(3)malignant brain tumor-like protein 3 OS=Homo sapi	Lethal(3)malignant brain tumor-like protein 3	85.744	755	0.96516	0.97708	2	0.43511	0.70443	2	3.2	3.8	2	2	26439000	22233000	23379000	48817000
RPRD2	>sp|Q5VT52-3|RPRD2_HUMAN Isoform 3 of Regulation of nuclear pre-mRNA domain-containing protein 2 OS=Homo sapiens GN=RPRD2;>sp|Q5VT52-2|RPRD2_HUMAN Isoform 2 of Regulation of nuclear pre-mRNA domain-containing protein 2 OS=Homo sapiens GN=RPRD2;>sp|Q5VT52|R	Regulation of nuclear pre-mRNA domain-containing protein 2	152.87	1435	0.97114	0.9762	18	0.51763	0.88196	18	24.5	21.2	23	19	1396100000	1251700000	690430000	1130700000
RBM7	>tr|Q6IRX3|Q6IRX3_HUMAN RNA binding motif protein 7 OS=Homo sapiens GN=RBM7 PE=2 SV=1;>tr|J3KPD3|J3KPD3_HUMAN RNA binding motif protein 7, isoform CRA_c OS=Homo sapiens GN=RBM7 PE=1 SV=1;>sp|Q9Y580|RBM7_HUMAN RNA-binding protein 7 OS=Homo sapiens GN=RBM7 P	RNA-binding protein 7	30.531	266	1.0733	0.97592	4	0.78142	1.2373	5	19.2	17.7	4	4	109700000	99240000	80345000	126470000
RPL10A	>sp|P62906|RL10A_HUMAN 60S ribosomal protein L10a OS=Homo sapiens GN=RPL10A PE=1 SV=2;>tr|Q1JQ76|Q1JQ76_HUMAN Ribosomal protein (Fragment) OS=Homo sapiens GN=RPL10A PE=2 SV=1;>tr|A0A024RCW3|A0A024RCW3_HUMAN Ribosomal protein OS=Homo sapiens GN=RPL10A PE=3	60S ribosomal protein L10a;Ribosomal protein	24.831	217	0.99956	0.97305	12	0.64224	1.0089	9	46.1	36.4	10	7	452440000	424090000	336990000	504060000
ATP5B;HEL-S-271	>tr|Q0QEN7|Q0QEN7_HUMAN ATP synthase subunit beta (Fragment) OS=Homo sapiens GN=ATP5B PE=2 SV=1;>tr|V9HW31|V9HW31_HUMAN ATP synthase subunit beta OS=Homo sapiens GN=HEL-S-271 PE=2 SV=1;>sp|P06576|ATPB_HUMAN ATP synthase subunit beta, mitochondrial OS=Homo	ATP synthase subunit beta;ATP synthase subunit beta, mitochondrial	48.113	445	0.95324	0.97134	8	0.5083	0.83561	9	22.9	25.2	8	8	226710000	214330000	183200000	355130000
SF3B1	>sp|O75533|SF3B1_HUMAN Splicing factor 3B subunit 1 OS=Homo sapiens GN=SF3B1 PE=1 SV=3;>tr|Q7Z497|Q7Z497_HUMAN SF3B1 protein (Fragment) OS=Homo sapiens GN=SF3B1 PE=2 SV=1	Splicing factor 3B subunit 1	145.83	1304	0.95225	0.97004	62	0.69646	1.1165	50	54.1	44	54	45	5094200000	5219700000	2806700000	3819800000
SMARCC1	>tr|Q58EY4|Q58EY4_HUMAN SWI/SNF related, matrix associated, actin dependent regulator of chromatin, subfamily c, member 1 OS=Homo sapiens GN=SMARCC1 PE=2 SV=1;>sp|Q92922|SMRC1_HUMAN SWI/SNF complex subunit SMARCC1 OS=Homo sapiens GN=SMARCC1 PE=1 SV=3;>tr|Q	SWI/SNF complex subunit SMARCC1	122.91	1105	0.90851	0.96693	4	0.87141	1.3795	2	10.5	6	3	2	68963000	70662000	24638000	28442000
LMNB1	>sp|P20700|LMNB1_HUMAN Lamin-B1 OS=Homo sapiens GN=LMNB1 PE=1 SV=2;>tr|Q6DC98|Q6DC98_HUMAN LMNB1 protein (Fragment) OS=Homo sapiens GN=LMNB1 PE=2 SV=1;>tr|E9PBF6|E9PBF6_HUMAN Lamin-B1 OS=Homo sapiens GN=LMNB1 PE=1 SV=1;>tr|B4DZT3|B4DZT3_HUMAN cDNA FLJ50934	Lamin-B1	66.408	586	1.0196	0.96469	3	0.50094	0.77481	5	6.1	9.6	3	5	64699000	59075000	66913000	106430000
C19orf43	>sp|Q9BQ61|CS043_HUMAN Uncharacterized protein C19orf43 OS=Homo sapiens GN=C19orf43 PE=1 SV=1;>tr|K7EN60|K7EN60_HUMAN Uncharacterized protein C19orf43 OS=Homo sapiens GN=C19orf43 PE=1 SV=1;>tr|B2RE11|B2RE11_HUMAN cDNA, FLJ96865 OS=Homo sapiens PE=2 SV=1;>t	Uncharacterized protein C19orf43	18.419	176	0.81791	0.96434	8	0.77268	1.1198	7	38.6	38.6	6	6	976240000	1262500000	429080000	712330000
SFRS15;SCAF4	>tr|Q0P607|Q0P607_HUMAN Splicing factor, arginine/serine-rich 15 OS=Homo sapiens GN=SFRS15 PE=2 SV=1;>sp|O95104|SFR15_HUMAN Splicing factor, arginine/serine-rich 15 OS=Homo sapiens GN=SCAF4 PE=1 SV=3;>sp|O95104-2|SFR15_HUMAN Isoform 2 of Splicing factor, a	Splicing factor, arginine/serine-rich 15	125.74	1146	0.98275	0.96383	8	0.68307	1.0799	6	8.9	10.6	8	8	270260000	288640000	176950000	274060000
RPL17;hCG_24487	>tr|A0A087WXM6|A0A087WXM6_HUMAN 60S ribosomal protein L17 (Fragment) OS=Homo sapiens GN=RPL17 PE=1 SV=1;>tr|J3QQT2|J3QQT2_HUMAN 60S ribosomal protein L17 (Fragment) OS=Homo sapiens GN=RPL17 PE=1 SV=1;>tr|J3KRX5|J3KRX5_HUMAN 60S ribosomal protein L17 (Fragm	60S ribosomal protein L17	19.586	169	1.0427	0.96246	9	0.65661	0.93454	7	45.6	29.6	7	4	726750000	717770000	450170000	693900000
PML;PML-RAR;promyelocytic leukemia protein	>tr|Q59GQ8|Q59GQ8_HUMAN Promyelocytic leukemia protein isoform 8 variant (Fragment) OS=Homo sapiens PE=2 SV=1;>tr|H3BT57|H3BT57_HUMAN Protein PML OS=Homo sapiens GN=PML PE=1 SV=1;>tr|Q59H09|Q59H09_HUMAN Promyelocytic leukemia protein isoform 11 variant (Fr	Protein PML	42.108	372	0.94924	0.96176	3	0.82606	1.2943	4	6.7	12.9	3	5	31034000	33660000	144050000	162740000
hCG_1989366;NUP50	>tr|A0A024R4X7|A0A024R4X7_HUMAN HCG1989366, isoform CRA_a OS=Homo sapiens GN=hCG_1989366 PE=4 SV=1;>sp|Q9UKX7-2|NUP50_HUMAN Isoform 2 of Nuclear pore complex protein Nup50 OS=Homo sapiens GN=NUP50;>sp|Q9UKX7|NUP50_HUMAN Nuclear pore complex protein Nup50 O	Nuclear pore complex protein Nup50	50.144	468	0.97383	0.96165	2	0.86456	1.4843	2	9.4	7.1	2	2	42434000	40106000	30251000	36786000
RPL27	>tr|E4W6B6|E4W6B6_HUMAN RPL27/NME2 fusion protein (Fragment) OS=Homo sapiens GN=RPL27 PE=2 SV=1;>tr|B2R4D8|B2R4D8_HUMAN 60S ribosomal protein L27 OS=Homo sapiens PE=2 SV=1;>tr|A0A024R1V4|A0A024R1V4_HUMAN 60S ribosomal protein L27 OS=Homo sapiens GN=RPL27 P	60S ribosomal protein L27	14.257	126	1.0252	0.96139	2	NA	NA	1	13.5	6.3	2	1	31333000	29364000	7705500	11185000
HDGFRP3	>tr|A0A024R216|A0A024R216_HUMAN Hepatoma-derived growth factor, related protein 3, isoform CRA_a OS=Homo sapiens GN=HDGFRP3 PE=4 SV=1;>sp|Q9Y3E1|HDGR3_HUMAN Hepatoma-derived growth factor-related protein 3 OS=Homo sapiens GN=HDGFRP3 PE=1 SV=1;>tr|H3BTV7|H3	Hepatoma-derived growth factor-related protein 3	22.619	203	1.0399	0.96085	2	0.35883	0.59581	4	31.5	31.5	3	3	65392000	63788000	72070000	181600000
RPSA;LOC388524;RPSAP58	>tr|C9J9K3|C9J9K3_HUMAN 40S ribosomal protein SA (Fragment) OS=Homo sapiens GN=RPSA PE=1 SV=3;>tr|Q96RS2|Q96RS2_HUMAN 40S ribosomal protein SA OS=Homo sapiens GN=RPSA PE=2 SV=1;>tr|A0A024R2P0|A0A024R2P0_HUMAN 40S ribosomal protein SA OS=Homo sapiens GN=RPS	40S ribosomal protein SA	29.505	264	0.93465	0.95927	2	0.56562	0.89207	2	12.1	12.1	2	2	80523000	80186000	82119000	130860000
BAZ2A	>tr|J3QK86|J3QK86_HUMAN Bromodomain adjacent to zinc finger domain, 2A, isoform CRA_a OS=Homo sapiens GN=BAZ2A PE=4 SV=1;>tr|J3KPG5|J3KPG5_HUMAN Bromodomain adjacent to zinc finger domain protein 2A OS=Homo sapiens GN=BAZ2A PE=1 SV=1;>tr|F8VU39|F8VU39_HUMA	Bromodomain adjacent to zinc finger domain protein 2A	207.81	1873	0.93325	0.95753	48	0.68463	1.0913	30	26.9	23.6	43	38	2966900000	2694700000	1581000000	2106800000
FUBP1	>tr|B4E0X8|B4E0X8_HUMAN cDNA FLJ61021, highly similar to Far upstream element-binding protein 1 OS=Homo sapiens PE=2 SV=1;>sp|Q96AE4|FUBP1_HUMAN Far upstream element-binding protein 1 OS=Homo sapiens GN=FUBP1 PE=1 SV=3;>sp|Q96AE4-2|FUBP1_HUMAN Isoform 2 of	Far upstream element-binding protein 1	66.231	629	0.91217	0.95694	32	0.55339	0.86239	34	48.5	46.3	23	22	4359600000	4121200000	2936200000	4889100000
HCTP4;TPX2	>tr|Q643R0|Q643R0_HUMAN HCTP4 OS=Homo sapiens GN=HCTP4 PE=2 SV=1;>sp|Q9ULW0|TPX2_HUMAN Targeting protein for Xklp2 OS=Homo sapiens GN=TPX2 PE=1 SV=2;>sp|Q9ULW0-2|TPX2_HUMAN Isoform 2 of Targeting protein for Xklp2 OS=Homo sapiens GN=TPX2;>tr|B3KM90|B3KM90_	Targeting protein for Xklp2	85.652	747	0.91167	0.95557	61	0.4202	0.65011	59	56.8	59.6	45	47	6437400000	6275100000	3346300000	7355700000
RPLP0;RPLP0P6	>tr|Q53HW2|Q53HW2_HUMAN Ribosomal protein P0 variant (Fragment) OS=Homo sapiens PE=2 SV=1;>tr|A8K4Z4|A8K4Z4_HUMAN cDNA FLJ75549, highly similar to Homo sapiens ribosomal protein, large, P0 (RPLP0), transcript variant 1, mRNA OS=Homo sapiens PE=2 SV=1;>tr|A	60S acidic ribosomal protein P0;60S acidic ribosomal protein P0-like	34.301	317	1.0355	0.95491	6	0.75221	1.1325	7	26.5	28.7	7	7	303840000	307030000	372110000	522690000
C10orf12	>sp|Q8N655|CJ012_HUMAN Uncharacterized protein C10orf12 OS=Homo sapiens GN=C10orf12 PE=1 SV=1;>tr|A0PJI9|A0PJI9_HUMAN C10orf12 protein (Fragment) OS=Homo sapiens GN=C10orf12 PE=2 SV=1	Uncharacterized protein C10orf12	137.22	1247	0.99908	0.9547	2	NA	NA	1	1.6	1	2	1	18594000	18593000	5082200	6852900
PTPLAD1	>sp|Q9P035|HACD3_HUMAN Very-long-chain (3R)-3-hydroxyacyl-CoA dehydratase 3 OS=Homo sapiens GN=PTPLAD1 PE=1 SV=2;>tr|H3BPZ1|H3BPZ1_HUMAN Very-long-chain (3R)-3-hydroxyacyl-CoA dehydratase 3 OS=Homo sapiens GN=PTPLAD1 PE=1 SV=1;>tr|H3BS72|H3BS72_HUMAN Very-	Very-long-chain (3R)-3-hydroxyacyl-CoA dehydratase 3	43.159	362	1.0376	0.9483	3	0.51419	0.83498	2	10.8	5.8	3	2	78524000	69412000	27546000	43992000
ZC3H14	>sp|Q6PJT7-5|ZC3HE_HUMAN Isoform 5 of Zinc finger CCCH domain-containing protein 14 OS=Homo sapiens GN=ZC3H14;>sp|Q6PJT7|ZC3HE_HUMAN Zinc finger CCCH domain-containing protein 14 OS=Homo sapiens GN=ZC3H14 PE=1 SV=1;>tr|G3V256|G3V256_HUMAN Zinc finger CCCH	Zinc finger CCCH domain-containing protein 14	80.02	711	0.93554	0.94667	23	0.74011	1.1624	26	40.6	38.4	1	1	959590000	953790000	916750000	1083500000
HNRPA2B1;HNRNPA2B1	>tr|A0A024RA61|A0A024RA61_HUMAN Heterogeneous nuclear ribonucleoprotein A2/B1, isoform CRA_c OS=Homo sapiens GN=HNRPA2B1 PE=4 SV=1;>sp|P22626|ROA2_HUMAN Heterogeneous nuclear ribonucleoproteins A2/B1 OS=Homo sapiens GN=HNRNPA2B1 PE=1 SV=2;>tr|A0A024RA27|A0	Heterogeneous nuclear ribonucleoproteins A2/B1	37.429	353	0.84336	0.94537	42	0.67217	1.0809	40	60.3	55.5	24	22	11257000000	14197000000	8775000000	12420000000
H1FX	>sp|Q92522|H1X_HUMAN Histone H1x OS=Homo sapiens GN=H1FX PE=1 SV=1	Histone H1x	22.487	213	0.93496	0.94065	9	0.40979	0.65302	10	40.8	41.3	8	9	1298800000	1348000000	1029800000	2007900000
PRCC	>tr|Q96FT4|Q96FT4_HUMAN Papillary renal cell carcinoma (Translocation-associated) OS=Homo sapiens GN=PRCC PE=2 SV=1;>sp|Q92733|PRCC_HUMAN Proline-rich protein PRCC OS=Homo sapiens GN=PRCC PE=1 SV=1	Proline-rich protein PRCC	52.421	491	0.99833	0.93953	2	0.60211	0.94	2	6.1	4.7	2	2	16507000	17327000	11862000	22510000
PHF5A	>tr|A0A024R1U2|A0A024R1U2_HUMAN PHD finger protein 5A, isoform CRA_a OS=Homo sapiens GN=PHF5A PE=4 SV=1;>sp|Q7RTV0|PHF5A_HUMAN PHD finger-like domain-containing protein 5A OS=Homo sapiens GN=PHF5A PE=1 SV=1	PHD finger-like domain-containing protein 5A	12.405	110	0.92781	0.93928	7	0.70912	1.1426	4	69.1	69.1	7	7	287610000	423350000	325180000	563310000
KRR1	>sp|Q13601-2|KRR1_HUMAN Isoform 2 of KRR1 small subunit processome component homolog OS=Homo sapiens GN=KRR1;>sp|Q13601|KRR1_HUMAN KRR1 small subunit processome component homolog OS=Homo sapiens GN=KRR1 PE=1 SV=4;>tr|A0A087WZC7|A0A087WZC7_HUMAN KRR1 small	KRR1 small subunit processome component homolog	36.788	324	1.0109	0.93882	5	0.55739	0.8867	4	22.2	16.7	7	5	152490000	147590000	68850000	93819000
CNBP	>sp|P62633-2|CNBP_HUMAN Isoform 2 of Cellular nucleic acid-binding protein OS=Homo sapiens GN=CNBP;>sp|P62633|CNBP_HUMAN Cellular nucleic acid-binding protein OS=Homo sapiens GN=CNBP PE=1 SV=1;>sp|P62633-7|CNBP_HUMAN Isoform 7 of Cellular nucleic acid-bind	Cellular nucleic acid-binding protein	18.742	170	0.92951	0.93788	7	0.64321	0.98916	8	32.9	45.3	5	6	284680000	333710000	428450000	584220000
DLX6;DLX1	>tr|G3V471|G3V471_HUMAN Homeobox protein DLX-6 OS=Homo sapiens GN=DLX6 PE=4 SV=1;>sp|P56179|DLX6_HUMAN Homeobox protein DLX-6 OS=Homo sapiens GN=DLX6 PE=2 SV=2;>sp|P56179-2|DLX6_HUMAN Isoform 2 of Homeobox protein DLX-6 OS=Homo sapiens GN=DLX6;>sp|P56179-3	Homeobox protein DLX-6;Homeobox protein DLX-1	18.571	165	0.95599	0.93776	2	0.59761	0.95149	3	16.4	24.8	1	2	74369000	73795000	43464000	90559000
GATAD2B	>sp|Q8WXI9|P66B_HUMAN Transcriptional repressor p66-beta OS=Homo sapiens GN=GATAD2B PE=1 SV=1;>tr|B3KSZ4|B3KSZ4_HUMAN cDNA FLJ37346 fis, clone BRAMY2021310, highly similar to Transcriptional repressor p66 beta OS=Homo sapiens PE=2 SV=1	Transcriptional repressor p66-beta	65.26	593	0.98342	0.93624	15	0.51734	0.83926	14	35.2	31.4	15	13	807220000	793180000	371700000	665880000
TOP1	>sp|P11387|TOP1_HUMAN DNA topoisomerase 1 OS=Homo sapiens GN=TOP1 PE=1 SV=2;>tr|B9EG90|B9EG90_HUMAN Topoisomerase (DNA) I OS=Homo sapiens GN=TOP1 PE=2 SV=1	DNA topoisomerase 1	90.725	765	0.91374	0.93558	76	0.68789	1.0635	67	50.8	44.7	38	33	20469000000	21292000000	15270000000	20576000000
ERH	>tr|A0A024R6D4|A0A024R6D4_HUMAN Enhancer of rudimentary homolog OS=Homo sapiens GN=ERH PE=3 SV=1;>sp|P84090|ERH_HUMAN Enhancer of rudimentary homolog OS=Homo sapiens GN=ERH PE=1 SV=1;>tr|G3V279|G3V279_HUMAN Enhancer of rudimentary homolog OS=Homo sapiens G	Enhancer of rudimentary homolog	12.259	104	0.98137	0.93378	10	0.62065	0.96956	9	50	45.2	6	5	784810000	759820000	362550000	561540000
WIZ	>tr|B9EGQ5|B9EGQ5_HUMAN Protein Wiz OS=Homo sapiens GN=WIZ PE=2 SV=1;>tr|M0QXA7|M0QXA7_HUMAN Protein Wiz OS=Homo sapiens GN=WIZ PE=1 SV=1;>sp|O95785-4|WIZ_HUMAN Isoform 4 of Protein Wiz OS=Homo sapiens GN=WIZ;>sp|O95785-3|WIZ_HUMAN Isoform 3 of Protein Wiz	Protein Wiz	89.054	832	0.97497	0.93375	10	0.36443	0.58124	14	18	18.5	12	15	305640000	280030000	177190000	398160000
HNRPDL;HNRNPDL	>tr|A0A087WUK2|A0A087WUK2_HUMAN Heterogeneous nuclear ribonucleoprotein D-like OS=Homo sapiens GN=HNRNPDL PE=1 SV=1;>tr|A0A024RDF6|A0A024RDF6_HUMAN Heterogeneous nuclear ribonucleoprotein D-like, isoform CRA_a OS=Homo sapiens GN=HNRPDL PE=4 SV=1;>sp|O14979	Heterogeneous nuclear ribonucleoprotein D-like	40.04	363	0.84166	0.92979	22	0.64066	1.0709	19	33.1	33.6	15	13	2871900000	2856100000	2299100000	2964900000
NKX2-5	>sp|P52952|NKX25_HUMAN Homeobox protein Nkx-2.5 OS=Homo sapiens GN=NKX2-5 PE=1 SV=1	Homeobox protein Nkx-2.5	34.917	324	0.91726	0.92945	3	0.55721	0.87023	3	9.9	9.9	2	2	115180000	102380000	82308000	135010000
PPP1CC	>tr|Q9UPN1|Q9UPN1_HUMAN Serine/threonine-protein phosphatase (Fragment) OS=Homo sapiens GN=PPP1CC PE=3 SV=1;>tr|F8VYE8|F8VYE8_HUMAN Serine/threonine-protein phosphatase OS=Homo sapiens GN=PPP1CC PE=1 SV=1;>tr|A0A024RBP2|A0A024RBP2_HUMAN Serine/threonine-pr	Serine/threonine-protein phosphatase;Serine/threonine-protein phosphatase PP1-gamma catalytic subunit	33.773	294	0.91675	0.92889	11	0.66335	1.0539	14	48.6	46.9	1	2	826000000	879520000	666410000	994380000
RBM14	>sp|Q96PK6|RBM14_HUMAN RNA-binding protein 14 OS=Homo sapiens GN=RBM14 PE=1 SV=2	RNA-binding protein 14	69.491	669	0.85898	0.92873	52	0.63341	0.98333	48	50.1	41	27	24	18277000000	19904000000	13015000000	19119000000
SYNCRIP	>tr|B2R8Z8|B2R8Z8_HUMAN cDNA, FLJ94136, highly similar to Homo sapiens synaptotagmin binding, cytoplasmic RNA interacting protein (SYNCRIP), mRNA OS=Homo sapiens PE=2 SV=1;>sp|O60506-2|HNRPQ_HUMAN Isoform 2 of Heterogeneous nuclear ribonucleoprotein Q OS=H	Heterogeneous nuclear ribonucleoprotein Q	69.601	623	0.9703	0.92821	14	0.72118	1.1329	18	35.2	33.9	14	14	1133600000	1207200000	827610000	1072600000
RRP1	>tr|B4DZM3|B4DZM3_HUMAN cDNA FLJ61500, highly similar to NNP-1 protein OS=Homo sapiens PE=2 SV=1;>tr|Q6PJJ2|Q6PJJ2_HUMAN RRP1 protein (Fragment) OS=Homo sapiens GN=RRP1 PE=2 SV=1;>sp|P56182|RRP1_HUMAN Ribosomal RNA processing protein 1 homolog A OS=Homo sa	Ribosomal RNA processing protein 1 homolog A	46.15	404	0.91656	0.92778	3	0.62383	1.0047	2	10.4	4	4	2	44358000	55269000	26335000	35929000
ZZZ3	>sp|Q8IYH5-4|ZZZ3_HUMAN Isoform 4 of ZZ-type zinc finger-containing protein 3 OS=Homo sapiens GN=ZZZ3;>sp|Q8IYH5-2|ZZZ3_HUMAN Isoform 2 of ZZ-type zinc finger-containing protein 3 OS=Homo sapiens GN=ZZZ3;>sp|Q8IYH5|ZZZ3_HUMAN ZZ-type zinc finger-containing	ZZ-type zinc finger-containing protein 3	76.125	683	0.91213	0.92742	3	NA	NA	0	5	0	3	0	49391000	52750000	0	0
BUD31	>sp|P41223|BUD31_HUMAN Protein BUD31 homolog OS=Homo sapiens GN=BUD31 PE=1 SV=2;>tr|C9JNV2|C9JNV2_HUMAN Protein BUD31 homolog OS=Homo sapiens GN=BUD31 PE=1 SV=1;>sp|P41223-2|BUD31_HUMAN Isoform 2 of Protein BUD31 homolog OS=Homo sapiens GN=BUD31;>tr|C9JCD9	Protein BUD31 homolog	17	144	0.92089	0.92615	7	0.68392	1.1228	6	39.6	41	6	5	235430000	249340000	163230000	224840000
PCBP1	>tr|Q53SS8|Q53SS8_HUMAN Epididymis secretory protein Li 85 OS=Homo sapiens GN=PCBP1 PE=2 SV=1;>sp|Q15365|PCBP1_HUMAN Poly(rC)-binding protein 1 OS=Homo sapiens GN=PCBP1 PE=1 SV=2	Poly(rC)-binding protein 1	37.497	356	0.94662	0.92597	6	0.73137	1.0716	5	22.2	20.5	5	4	331870000	318230000	300310000	399960000
TPR	>sp|P12270|TPR_HUMAN Nucleoprotein TPR OS=Homo sapiens GN=TPR PE=1 SV=3	Nucleoprotein TPR	267.29	2363	0.93091	0.92265	44	1.111	1.7565	47	23.4	22.2	47	49	2020900000	2143400000	2460300000	2320500000
SLC25A3	>tr|F8VVM2|F8VVM2_HUMAN Phosphate carrier protein, mitochondrial OS=Homo sapiens GN=SLC25A3 PE=1 SV=1;>tr|Q8NCF7|Q8NCF7_HUMAN cDNA FLJ90278 fis, clone NT2RP1000325, highly similar to Phosphate carrier protein, mitochondrialprecursor OS=Homo sapiens PE=2 SV	Phosphate carrier protein, mitochondrial	36.161	324	1.0082	0.92243	5	0.63173	1.0249	6	24.1	24.1	6	6	253100000	243460000	162480000	256100000
HNRNPR;HNRPR	>sp|O43390|HNRPR_HUMAN Heterogeneous nuclear ribonucleoprotein R OS=Homo sapiens GN=HNRNPR PE=1 SV=1;>tr|Q0VGD6|Q0VGD6_HUMAN HNRPR protein (Fragment) OS=Homo sapiens GN=HNRPR PE=2 SV=1;>tr|B2R7W4|B2R7W4_HUMAN cDNA, FLJ93632, highly similar to Homo sapiens	Heterogeneous nuclear ribonucleoprotein R	70.942	633	0.91264	0.92174	26	0.71649	1.1068	22	39.2	35.5	1	1	2797900000	6338200000	2143600000	2833300000
SNRNP200	>sp|O75643|U520_HUMAN U5 small nuclear ribonucleoprotein 200 kDa helicase OS=Homo sapiens GN=SNRNP200 PE=1 SV=2;>tr|A4FU77|A4FU77_HUMAN SNRNP200 protein (Fragment) OS=Homo sapiens GN=SNRNP200 PE=2 SV=1	U5 small nuclear ribonucleoprotein 200 kDa helicase	244.5	2136	0.95982	0.91842	22	0.73482	1.1797	14	14.1	11.5	24	20	1135900000	675950000	657580000	482480000
HMGB3	>tr|E7ES08|E7ES08_HUMAN High mobility group protein B3 (Fragment) OS=Homo sapiens GN=HMGB3 PE=1 SV=1;>tr|E7EQU1|E7EQU1_HUMAN High mobility group protein B3 (Fragment) OS=Homo sapiens GN=HMGB3 PE=1 SV=1;>sp|O15347|HMGB3_HUMAN High mobility group protein B3	High mobility group protein B3	21.444	188	1.0536	0.9182	3	0.46877	0.82136	4	21.3	19.1	3	3	103710000	98659000	45017000	81424000
PSIP1	>sp|O75475|PSIP1_HUMAN PC4 and SFRS1-interacting protein OS=Homo sapiens GN=PSIP1 PE=1 SV=1;>sp|O75475-3|PSIP1_HUMAN Isoform 3 of PC4 and SFRS1-interacting protein OS=Homo sapiens GN=PSIP1;>sp|O75475-2|PSIP1_HUMAN Isoform 2 of PC4 and SFRS1-interacting pro	PC4 and SFRS1-interacting protein	60.103	530	0.92581	0.91733	15	0.54374	0.82321	15	28.7	25.3	16	12	924770000	1650000000	608680000	1145100000
HNRPD;HNRNPD	>tr|A0A024RDF4|A0A024RDF4_HUMAN Heterogeneous nuclear ribonucleoprotein D (AU-rich element RNA binding protein 1, 37kDa), isoform CRA_e OS=Homo sapiens GN=HNRPD PE=4 SV=1;>tr|A0A024RDF3|A0A024RDF3_HUMAN Heterogeneous nuclear ribonucleoprotein D (AU-rich el	Heterogeneous nuclear ribonucleoprotein D0	32.834	306	0.9318	0.91532	16	0.75112	1.1707	17	41.2	32	12	12	4403000000	4568200000	2845700000	3901900000
API5	>tr|G3V1C3|G3V1C3_HUMAN Apoptosis inhibitor 5 OS=Homo sapiens GN=API5 PE=1 SV=1;>sp|Q9BZZ5-2|API5_HUMAN Isoform 2 of Apoptosis inhibitor 5 OS=Homo sapiens GN=API5;>sp|Q9BZZ5|API5_HUMAN Apoptosis inhibitor 5 OS=Homo sapiens GN=API5 PE=1 SV=3;>sp|Q9BZZ5-3|AP	Apoptosis inhibitor 5	57.56	510	1.0054	0.91325	6	0.63698	1.0784	8	14.9	19.2	6	9	188330000	181650000	196150000	265860000
HEL25;CBX5	>tr|V9HWG0|V9HWG0_HUMAN Chromobox homolog 5 (HP1 alpha homolog, Drosophila), isoform CRA_b OS=Homo sapiens GN=HEL25 PE=2 SV=1;>sp|P45973|CBX5_HUMAN Chromobox protein homolog 5 OS=Homo sapiens GN=CBX5 PE=1 SV=1;>tr|Q6I9T7|Q6I9T7_HUMAN CBX5 protein OS=Homo s	Chromobox protein homolog 5	22.225	191	0.96431	0.91181	20	0.49777	0.74852	20	53.4	53.4	10	9	3094500000	3223200000	2981200000	4852300000
CBX3	>tr|A4D177|A4D177_HUMAN Chromobox homolog 3 (HP1 gamma homolog, Drosophila) OS=Homo sapiens GN=CBX3 PE=4 SV=1;>sp|Q13185|CBX3_HUMAN Chromobox protein homolog 3 OS=Homo sapiens GN=CBX3 PE=1 SV=4	Chromobox protein homolog 3	20.811	183	0.84173	0.91169	12	0.85715	1.2288	8	52.5	36.6	6	3	5356900000	5693400000	3706900000	4034900000
MMTAG2	>sp|Q9BU76-4|MMTA2_HUMAN Isoform 4 of Multiple myeloma tumor-associated protein 2 OS=Homo sapiens GN=MMTAG2;>sp|Q9BU76|MMTA2_HUMAN Multiple myeloma tumor-associated protein 2 OS=Homo sapiens GN=MMTAG2 PE=1 SV=1;>sp|Q9BU76-3|MMTA2_HUMAN Isoform 3 of Multipl	Multiple myeloma tumor-associated protein 2	20.536	189	0.96671	0.91037	13	0.67903	1.0101	8	55.6	43.4	12	7	916490000	927800000	642650000	956570000
RRBP1	>tr|A0A0A0MRV0|A0A0A0MRV0_HUMAN Ribosome-binding protein 1 OS=Homo sapiens GN=RRBP1 PE=4 SV=1;>tr|A7BI36|A7BI36_HUMAN p180/ribosome receptor OS=Homo sapiens GN=RRBP1 PE=2 SV=2;>sp|Q9P2E9-2|RRBP1_HUMAN Isoform 1 of Ribosome-binding protein 1 OS=Homo sapiens	Ribosome-binding protein 1	152.45	1410	0.90784	0.91019	14	0.71862	1.1856	11	11.1	8.6	14	11	313390000	337410000	217980000	267690000
NDUFA8	>sp|P51970|NDUA8_HUMAN NADH dehydrogenase [ubiquinone] 1 alpha subcomplex subunit 8 OS=Homo sapiens GN=NDUFA8 PE=1 SV=3;>tr|B7Z768|B7Z768_HUMAN cDNA FLJ52138, highly similar to NADH dehydrogenase (ubiquinone) 1 alpha subcomplex subunit 8 (EC 1.6.5.3) OS=Ho	NADH dehydrogenase [ubiquinone] 1 alpha subcomplex subunit 8	20.105	172	0.8976	0.90955	3	0.52739	0.7961	4	16.3	33.1	2	4	44022000	46862000	55137000	85101000
RPS7	>tr|B5MCP9|B5MCP9_HUMAN 40S ribosomal protein S7 OS=Homo sapiens GN=RPS7 PE=1 SV=1;>sp|P62081|RS7_HUMAN 40S ribosomal protein S7 OS=Homo sapiens GN=RPS7 PE=1 SV=1	40S ribosomal protein S7	21.312	187	0.97369	0.90912	3	0.60317	0.96641	3	22.5	22.5	3	3	84275000	64520000	76074000	116760000
PRPF6	>sp|O94906-2|PRP6_HUMAN Isoform 2 of Pre-mRNA-processing factor 6 OS=Homo sapiens GN=PRPF6;>sp|O94906|PRP6_HUMAN Pre-mRNA-processing factor 6 OS=Homo sapiens GN=PRPF6 PE=1 SV=1	Pre-mRNA-processing factor 6	102.43	901	0.99665	0.90898	3	0.86807	1.396	4	7.9	7.3	6	6	120950000	116070000	84126000	98473000
SNRPD2	>sp|P62316|SMD2_HUMAN Small nuclear ribonucleoprotein Sm D2 OS=Homo sapiens GN=SNRPD2 PE=1 SV=1;>tr|K7ERG4|K7ERG4_HUMAN Small nuclear ribonucleoprotein Sm D2 OS=Homo sapiens GN=SNRPD2 PE=1 SV=1;>sp|P62316-2|SMD2_HUMAN Isoform 2 of Small nuclear ribonucleop	Small nuclear ribonucleoprotein Sm D2	13.527	118	0.88206	0.90816	4	0.87084	1.4933	2	30.5	14.4	4	2	149140000	142990000	52753000	59104000
ZFR	>tr|B2RNR6|B2RNR6_HUMAN Zinc finger RNA binding protein OS=Homo sapiens GN=ZFR PE=2 SV=1;>sp|Q96KR1|ZFR_HUMAN Zinc finger RNA-binding protein OS=Homo sapiens GN=ZFR PE=1 SV=2	Zinc finger RNA-binding protein	117.01	1074	0.89203	0.90715	32	0.60957	0.95839	33	39.6	36	30	28	3062600000	3256500000	1945500000	2725900000
EP400	>sp|Q96L91-3|EP400_HUMAN Isoform 3 of E1A-binding protein p400 OS=Homo sapiens GN=EP400;>sp|Q96L91-5|EP400_HUMAN Isoform 5 of E1A-binding protein p400 OS=Homo sapiens GN=EP400;>sp|Q96L91-2|EP400_HUMAN Isoform 2 of E1A-binding protein p400 OS=Homo sapiens G	E1A-binding protein p400	335.8	3086	0.93446	0.90651	14	0.61948	0.99103	7	7.9	5.1	17	9	391000000	394510000	129460000	208600000
WAC	>sp|Q9BTA9|WAC_HUMAN WW domain-containing adapter protein with coiled-coil OS=Homo sapiens GN=WAC PE=1 SV=3;>sp|Q9BTA9-5|WAC_HUMAN Isoform 4 of WW domain-containing adapter protein with coiled-coil OS=Homo sapiens GN=WAC;>sp|Q9BTA9-2|WAC_HUMAN Isoform 2 of	WW domain-containing adapter protein with coiled-coil	70.723	647	0.98164	0.90624	6	0.65831	1.0121	9	17.3	24.1	6	10	404070000	368860000	343080000	477110000
HIST1H4H;HIST1H4A	>tr|B2R4R0|B2R4R0_HUMAN Histone H4 OS=Homo sapiens GN=HIST1H4J PE=2 SV=1;>sp|P62805|H4_HUMAN Histone H4 OS=Homo sapiens GN=HIST1H4A PE=1 SV=2;>tr|Q0VAS5|Q0VAS5_HUMAN Histone H4 OS=Homo sapiens GN=HIST1H4H PE=2 SV=1	Histone H4	11.367	103	0.86699	0.90622	9	0.64338	0.96502	7	51.5	51.5	6	6	3206300000	3467000000	1291500000	1854100000
YTHDF2	>tr|A0A087WXZ3|A0A087WXZ3_HUMAN YTH domain-containing family protein 2 OS=Homo sapiens GN=YTHDF2 PE=1 SV=1;>tr|B5BU99|B5BU99_HUMAN High glucose-regulated protein 8 OS=Homo sapiens GN=YTHDF2 PE=2 SV=1;>sp|Q9Y5A9|YTHD2_HUMAN YTH domain-containing family prot	YTH domain-containing family protein 2	61.163	569	0.92187	0.90589	2	0.8497	1.366	2	4	4.4	2	2	53007000	38803000	42695000	43544000
EIF5A;EIF5A2;EIF5AL1	>sp|P63241|IF5A1_HUMAN Eukaryotic translation initiation factor 5A-1 OS=Homo sapiens GN=EIF5A PE=1 SV=2;>sp|P63241-2|IF5A1_HUMAN Isoform 2 of Eukaryotic translation initiation factor 5A-1 OS=Homo sapiens GN=EIF5A;>tr|I3L397|I3L397_HUMAN Eukaryotic translat	Eukaryotic translation initiation factor 5A-1;Eukaryotic translation initiation factor 5A-2;Eukaryotic translation initiation factor 5A-1-like	16.832	154	0.97595	0.90333	7	0.84377	1.2505	5	55.2	40.3	5	4	737130000	647890000	651540000	614810000
GNB2L1	>tr|D6RAC2|D6RAC2_HUMAN Guanine nucleotide-binding protein subunit beta-2-like 1 OS=Homo sapiens GN=GNB2L1 PE=1 SV=1;>tr|E9KL35|E9KL35_HUMAN Epididymis tissue sperm binding protein Li 3a OS=Homo sapiens PE=2 SV=1;>tr|D6REE5|D6REE5_HUMAN Guanine nucleotide-	Guanine nucleotide-binding protein subunit beta-2-like 1;Guanine nucleotide-binding protein subunit beta-2-like 1, N-terminally processed	29.75	269	0.87953	0.90296	2	0.65616	1.0809	3	11.2	20.1	2	4	59720000	55990000	50746000	67616000
DDX17	>tr|H3BLZ8|H3BLZ8_HUMAN Probable ATP-dependent RNA helicase DDX17 OS=Homo sapiens GN=DDX17 PE=1 SV=1;>tr|Q59F66|Q59F66_HUMAN DEAD box polypeptide 17 isoform p82 variant (Fragment) OS=Homo sapiens PE=2 SV=1;>sp|Q92841|DDX17_HUMAN Probable ATP-dependent RNA	Probable ATP-dependent RNA helicase DDX17	80.439	731	0.8904	0.90085	20	0.64696	0.98982	25	38.6	43.9	18	21	2374700000	2776500000	2404900000	3185900000
HIST1H2BC;HIST1H2BK;HIST1H2BN;HIST1H2BD;HIST1H2BM;HIST1H2BH;HIST2H2BF;H2BFS;HIST1H2BL;HIST1H2BA	>tr|B2R4S9|B2R4S9_HUMAN Histone H2B OS=Homo sapiens GN=HIST1H2BI PE=2 SV=1;>tr|A8K9J7|A8K9J7_HUMAN Histone H2B OS=Homo sapiens PE=2 SV=1;>tr|A0A024RCL8|A0A024RCL8_HUMAN Histone H2B OS=Homo sapiens GN=HIST1H2BK PE=3 SV=1;>tr|A0A024RCJ9|A0A024RCJ9_HUMAN Hist	Histone H2B;Histone H2B type 1-M;Histone H2B type 1-N;Histone H2B type 1-H;Histone H2B type 2-F;Histone H2B type 1-C/E/F/G/I;Histone H2B type 1-D;Histone H2B type 1-K;Histone H2B type F-S;Histone H2B type 1-L;Histone H2B type 1-A	13.906	126	0.8732	0.9003	12	0.6635	0.99254	12	61.1	52.4	1	2	10676000000	10869000000	7284200000	10134000000
EDF1	>sp|O60869|EDF1_HUMAN Endothelial differentiation-related factor 1 OS=Homo sapiens GN=EDF1 PE=1 SV=1;>sp|O60869-2|EDF1_HUMAN Isoform 2 of Endothelial differentiation-related factor 1 OS=Homo sapiens GN=EDF1;>sp|O60869-3|EDF1_HUMAN Isoform 3 of Endothelial	Endothelial differentiation-related factor 1	16.368	148	0.88385	0.89549	8	0.62911	1.0434	9	43.2	50	6	7	342500000	387550000	498580000	684760000
STAU1	>tr|Q5JW30|Q5JW30_HUMAN Double-stranded RNA-binding protein Staufen homolog 1 OS=Homo sapiens GN=STAU1 PE=1 SV=1;>tr|A8K622|A8K622_HUMAN cDNA FLJ75871, highly similar to Homo sapiens staufen, RNA binding protein (STAU), transcript variant T3, mRNA OS=Homo	Double-stranded RNA-binding protein Staufen homolog 1	54.708	494	0.91865	0.89512	6	0.77547	1.1918	8	21.3	18.6	8	7	283910000	343490000	246240000	290430000
SRRM1	>tr|E9PCT1|E9PCT1_HUMAN Serine/arginine repetitive matrix protein 1 OS=Homo sapiens GN=SRRM1 PE=1 SV=3;>tr|A9Z1X7|A9Z1X7_HUMAN Serine/arginine repetitive matrix protein 1 OS=Homo sapiens GN=SRRM1 PE=1 SV=1;>tr|B7Z7U0|B7Z7U0_HUMAN cDNA FLJ61739, highly simi	Serine/arginine repetitive matrix protein 1	93.435	820	0.91284	0.89468	3	0.76004	1.2783	2	2.7	2.3	2	2	47351000	55006000	26890000	36998000
NONO	>tr|A8K525|A8K525_HUMAN cDNA FLJ76817, highly similar to Homo sapiens non-POU domain containing, octamer-binding (NONO), mRNA OS=Homo sapiens PE=2 SV=1;>sp|Q15233|NONO_HUMAN Non-POU domain-containing octamer-binding protein OS=Homo sapiens GN=NONO PE=1 SV=	Non-POU domain-containing octamer-binding protein	54.287	471	0.83563	0.89244	61	0.78101	1.2631	52	55.2	53.5	25	24	7910300000	10000000000	7646000000	9494000000
TP53BP1	>sp|Q12888|TP53B_HUMAN Tumor suppressor p53-binding protein 1 OS=Homo sapiens GN=TP53BP1 PE=1 SV=2;>sp|Q12888-3|TP53B_HUMAN Isoform 3 of Tumor suppressor p53-binding protein 1 OS=Homo sapiens GN=TP53BP1;>sp|Q12888-2|TP53B_HUMAN Isoform 2 of Tumor suppresso	Tumor suppressor p53-binding protein 1	213.57	1972	0.91216	0.89229	11	0.64921	0.95892	14	9.9	10.3	15	15	467360000	464710000	414640000	545530000
FLJ10154;ARGLU1	>tr|A0A024RDW4|A0A024RDW4_HUMAN Uncharacterized protein OS=Homo sapiens GN=FLJ10154 PE=4 SV=1;>sp|Q9NWB6|ARGL1_HUMAN Arginine and glutamate-rich protein 1 OS=Homo sapiens GN=ARGLU1 PE=1 SV=1;>tr|B4E3J6|B4E3J6_HUMAN cDNA FLJ54293 OS=Homo sapiens PE=2 SV=1;>	Arginine and glutamate-rich protein 1	33.216	273	0.83109	0.89148	5	0.68974	1.0692	2	14.3	5.5	5	2	685840000	803740000	141060000	217010000
HNRNPA1;HNRPA1;hCG_2020860;RP11-78J21.1;HNRNPA1L2	>tr|F8W6I7|F8W6I7_HUMAN Heterogeneous nuclear ribonucleoprotein A1 OS=Homo sapiens GN=HNRNPA1 PE=1 SV=2;>tr|A0A024RB53|A0A024RB53_HUMAN Heterogeneous nuclear ribonucleoprotein A1, isoform CRA_a OS=Homo sapiens GN=HNRPA1 PE=4 SV=1;>tr|A0A024RAZ7|A0A024RAZ7_	Heterogeneous nuclear ribonucleoprotein A1;Heterogeneous nuclear ribonucleoprotein A1, N-terminally processed;Heterogeneous nuclear ribonucleoprotein A1-like 2	33.155	307	0.85416	0.89078	28	0.76274	1.2015	27	60.6	57.3	17	16	5115400000	5635500000	3704000000	4677000000
PRPF8	>sp|Q6P2Q9|PRP8_HUMAN Pre-mRNA-processing-splicing factor 8 OS=Homo sapiens GN=PRPF8 PE=1 SV=2;>tr|Q53GM6|Q53GM6_HUMAN U5 snRNP-specific protein variant (Fragment) OS=Homo sapiens PE=2 SV=1;>tr|B4DK16|B4DK16_HUMAN cDNA FLJ57882, highly similar to Pre-mRNA-	Pre-mRNA-processing-splicing factor 8	273.6	2335	0.87327	0.89073	3	0.55242	0.88051	2	1.4	1.1	3	2	35962000	39954000	17399000	31920000
RBM33	>sp|Q96EV2|RBM33_HUMAN RNA-binding protein 33 OS=Homo sapiens GN=RBM33 PE=1 SV=3;>tr|H0Y3K4|H0Y3K4_HUMAN RNA-binding protein 33 (Fragment) OS=Homo sapiens GN=RBM33 PE=1 SV=1;>tr|B4DVQ2|B4DVQ2_HUMAN cDNA FLJ60909, highly similar to Proline-rich protein 8 OS	RNA-binding protein 33	129.98	1170	0.81001	0.88992	11	0.57378	0.98922	8	14.7	12	11	9	383260000	416010000	213160000	354180000
PMS1	>tr|Q3BDU3|Q3BDU3_HUMAN PMS1 protein homolog 1 OS=Homo sapiens GN=PMS1 PE=1 SV=1;>tr|Q5FBZ9|Q5FBZ9_HUMAN PMS1 nirs variant 1 OS=Homo sapiens GN=PMS1 PE=1 SV=1;>tr|E9PC65|E9PC65_HUMAN PMS1 protein homolog 1 (Fragment) OS=Homo sapiens GN=PMS1 PE=1 SV=1;>tr|B	PMS1 protein homolog 1	74.057	659	0.89605	0.88961	3	NA	NA	1	5.5	1.7	3	1	28773000	32010000	13164000	18364000
RPS16	>tr|M0R1M5|M0R1M5_HUMAN 40S ribosomal protein S16 (Fragment) OS=Homo sapiens GN=RPS16 PE=1 SV=1;>tr|M0R3H0|M0R3H0_HUMAN 40S ribosomal protein S16 OS=Homo sapiens GN=RPS16 PE=1 SV=1;>tr|M0R210|M0R210_HUMAN 40S ribosomal protein S16 OS=Homo sapiens GN=RPS16	40S ribosomal protein S16	9.366	85	0.92826	0.88946	4	0.64734	1.0179	3	44.7	34.1	4	3	53114000	55628000	45142000	63157000
SYMPK;SYMPK variant protein	>tr|B7Z6F7|B7Z6F7_HUMAN cDNA FLJ61705, highly similar to Symplekin OS=Homo sapiens PE=2 SV=1;>tr|A0A024R0R6|A0A024R0R6_HUMAN Symplekin, isoform CRA_a OS=Homo sapiens GN=SYMPK PE=4 SV=1;>sp|Q92797|SYMPK_HUMAN Symplekin OS=Homo sapiens GN=SYMPK PE=1 SV=2;>tr	Symplekin	141.13	1274	0.87726	0.88936	4	0.91003	1.46	3	3.7	3.3	4	3	53338000	49161000	27633000	46406000
HEL-S-29;HEL-211;CKB	>tr|V9HWH2|V9HWH2_HUMAN Epididymis secretory protein Li 29 OS=Homo sapiens GN=HEL-S-29 PE=2 SV=1;>tr|V9HW77|V9HW77_HUMAN Epididymis luminal protein 211 OS=Homo sapiens GN=HEL-211 PE=2 SV=1;>sp|P12277|KCRB_HUMAN Creatine kinase B-type OS=Homo sapiens GN=CKB	Creatine kinase B-type	42.644	381	0.90976	0.88929	3	NA	NA	1	10.5	2.9	3	1	70130000	71831000	2195000	1015800
LRRC59	>sp|Q96AG4|LRC59_HUMAN Leucine-rich repeat-containing protein 59 OS=Homo sapiens GN=LRRC59 PE=1 SV=1	Leucine-rich repeat-containing protein 59	34.93	307	0.84521	0.88793	7	0.65021	1.0169	10	28.7	34.5	6	8	500890000	535480000	1098400000	1447600000
RTCB	>sp|Q9Y3I0|RTCB_HUMAN tRNA-splicing ligase RtcB homolog OS=Homo sapiens GN=RTCB PE=1 SV=1;>tr|B4DNA0|B4DNA0_HUMAN cDNA FLJ58027 OS=Homo sapiens PE=2 SV=1	tRNA-splicing ligase RtcB homolog	55.21	505	0.87194	0.88779	3	0.7452	1.1357	7	10.3	15.6	4	7	47885000	52098000	168400000	213890000
VPS72	>sp|Q15906|VPS72_HUMAN Vacuolar protein sorting-associated protein 72 homolog OS=Homo sapiens GN=VPS72 PE=1 SV=1;>sp|Q15906-2|VPS72_HUMAN Isoform 2 of Vacuolar protein sorting-associated protein 72 homolog OS=Homo sapiens GN=VPS72;>tr|B4DMP5|B4DMP5_HUMAN c	Vacuolar protein sorting-associated protein 72 homolog	40.594	364	0.86289	0.88593	3	0.43719	0.7264	3	9.1	13.5	3	4	102780000	104980000	66266000	111230000
TAF15	>sp|Q92804-2|RBP56_HUMAN Isoform Short of TATA-binding protein-associated factor 2N OS=Homo sapiens GN=TAF15;>sp|Q92804|RBP56_HUMAN TATA-binding protein-associated factor 2N OS=Homo sapiens GN=TAF15 PE=1 SV=1;>tr|B4E312|B4E312_HUMAN cDNA FLJ53422, highly s	TATA-binding protein-associated factor 2N	61.557	589	0.86305	0.88545	19	0.65176	1.0752	15	20.7	20.7	8	10	2114000000	2183600000	2333400000	3118700000
HIST1H3A;H3F3B;H3F3A;HIST2H3A;HIST3H3;H3F3C	>sp|P68431|H31_HUMAN Histone H3.1 OS=Homo sapiens GN=HIST1H3A PE=1 SV=2;>tr|K7EMV3|K7EMV3_HUMAN Histone H3 OS=Homo sapiens GN=H3F3B PE=1 SV=1;>tr|B4E380|B4E380_HUMAN Histone H3 OS=Homo sapiens PE=2 SV=1;>tr|B4DEB1|B4DEB1_HUMAN Histone H3 OS=Homo sapiens GN	Histone H3.1;Histone H3;Histone H3.2;Histone H3.1t;Histone H3.3;Histone H3.3C	15.404	136	0.80551	0.8847	4	0.53875	0.87558	4	40.4	16.9	2	1	1222900000	1594400000	651330000	1217600000
SRSF1	>tr|J3KTL2|J3KTL2_HUMAN Serine/arginine-rich-splicing factor 1 OS=Homo sapiens GN=SRSF1 PE=1 SV=1;>sp|Q07955|SRSF1_HUMAN Serine/arginine-rich splicing factor 1 OS=Homo sapiens GN=SRSF1 PE=1 SV=2;>tr|Q59FA2|Q59FA2_HUMAN Splicing factor, arginine/serine-rich	Serine/arginine-rich splicing factor 1	28.329	253	0.83964	0.88365	17	0.70821	1.1142	19	50.2	46.6	14	13	2354100000	2810000000	2566500000	3677800000
RBMX	>sp|P38159|RBMX_HUMAN RNA-binding motif protein, X chromosome OS=Homo sapiens GN=RBMX PE=1 SV=3;>sp|P38159-2|RBMX_HUMAN Isoform 2 of RNA-binding motif protein, X chromosome OS=Homo sapiens GN=RBMX;>tr|H3BT71|H3BT71_HUMAN RNA-binding motif protein, X chromo	RNA-binding motif protein, X chromosome;RNA-binding motif protein, X chromosome, N-terminally processed	42.331	391	0.82533	0.88361	22	0.596	0.98654	22	41.7	39.4	6	6	3130200000	3458400000	1807200000	2675700000
SRRT	>tr|Q7Z4Y3|Q7Z4Y3_HUMAN Arsenite-resistance protein ARS2 OS=Homo sapiens PE=2 SV=1;>tr|H7C3A1|H7C3A1_HUMAN Serrate RNA effector molecule homolog (Fragment) OS=Homo sapiens GN=SRRT PE=1 SV=1;>sp|Q9BXP5-5|SRRT_HUMAN Isoform 5 of Serrate RNA effector molecule	Serrate RNA effector molecule homolog	25.514	226	0.97918	0.88054	2	NA	NA	0	10.6	0	2	0	33729000	28402000	0	0
RSF1	>sp|Q96T23-2|RSF1_HUMAN Isoform 2 of Remodeling and spacing factor 1 OS=Homo sapiens GN=RSF1;>sp|Q96T23|RSF1_HUMAN Remodeling and spacing factor 1 OS=Homo sapiens GN=RSF1 PE=1 SV=2;>tr|H0YER1|H0YER1_HUMAN Remodeling and spacing factor 1 (Fragment) OS=Homo	Remodeling and spacing factor 1	160.13	1410	0.99605	0.88042	9	0.6794	1.1186	17	10.1	15.1	13	17	398390000	379480000	339670000	485350000
RPS18	>sp|P62269|RS18_HUMAN 40S ribosomal protein S18 OS=Homo sapiens GN=RPS18 PE=1 SV=3;>tr|J3JS69|J3JS69_HUMAN 40S ribosomal protein S18 OS=Homo sapiens GN=RPS18 PE=1 SV=1	40S ribosomal protein S18	17.718	152	0.83575	0.88039	2	NA	NA	0	9.9	5.9	2	1	23976000	29472000	0	0
CPSF6	>tr|F8WJN3|F8WJN3_HUMAN Cleavage and polyadenylation-specificity factor subunit 6 OS=Homo sapiens GN=CPSF6 PE=1 SV=1;>sp|Q16630-3|CPSF6_HUMAN Isoform 3 of Cleavage and polyadenylation specificity factor subunit 6 OS=Homo sapiens GN=CPSF6;>sp|Q16630|CPSF6_H	Cleavage and polyadenylation specificity factor subunit 6	52.269	478	0.84429	0.88035	9	0.70703	1.0972	7	20.1	13.4	7	6	411910000	444120000	324550000	419350000
HNRNPU;HNRPU	>tr|B3KX72|B3KX72_HUMAN cDNA FLJ44920 fis, clone BRAMY3011501, highly similar to Heterogeneous nuclear ribonucleoprotein U OS=Homo sapiens PE=2 SV=1;>sp|Q00839|HNRPU_HUMAN Heterogeneous nuclear ribonucleoprotein U OS=Homo sapiens GN=HNRNPU PE=1 SV=6;>tr|Q9	Heterogeneous nuclear ribonucleoprotein U	83.084	750	0.90793	0.878	22	0.739	1.1715	17	23.9	20.5	17	14	1056100000	1203000000	745450000	1053500000
BOD1L1	>sp|Q8NFC6|BD1L1_HUMAN Biorientation of chromosomes in cell division protein 1-like 1 OS=Homo sapiens GN=BOD1L1 PE=1 SV=2	Biorientation of chromosomes in cell division protein 1-like 1	330.46	3051	0.93149	0.87789	23	0.7761	1.2535	24	10	11.4	23	27	626890000	666130000	642000000	805100000
RPS10;RPS10-NUDT3;RPS10P5	>tr|Q59GE4|Q59GE4_HUMAN Ribosomal protein S10 variant (Fragment) OS=Homo sapiens PE=4 SV=1;>sp|P46783|RS10_HUMAN 40S ribosomal protein S10 OS=Homo sapiens GN=RPS10 PE=1 SV=1;>tr|F6U211|F6U211_HUMAN 40S ribosomal protein S10 OS=Homo sapiens GN=RPS10 PE=4 SV	40S ribosomal protein S10;Putative 40S ribosomal protein S10-like	19.86	174	0.8009	0.875	5	0.55465	0.92947	3	23.6	10.3	4	2	106100000	103330000	79939000	109890000
ZNF830	>tr|B2RDT9|B2RDT9_HUMAN cDNA, FLJ96765 OS=Homo sapiens PE=2 SV=1;>sp|Q96NB3|ZN830_HUMAN Zinc finger protein 830 OS=Homo sapiens GN=ZNF830 PE=1 SV=2	Zinc finger protein 830	39.383	348	0.94966	0.87418	5	0.73927	1.1548	3	19.3	11.8	5	3	115640000	119370000	51060000	66718000
SFSWAP;SFRS8	>sp|Q12872|SFSWA_HUMAN Splicing factor, suppressor of white-apricot homolog OS=Homo sapiens GN=SFSWAP PE=1 SV=3;>sp|Q12872-2|SFSWA_HUMAN Isoform 2 of Splicing factor, suppressor of white-apricot homolog OS=Homo sapiens GN=SFSWAP;>tr|Q59H38|Q59H38_HUMAN SFR	Splicing factor, suppressor of white-apricot homolog	104.82	951	0.95603	0.8707	5	0.74636	1.2875	5	4.8	5.7	5	6	84720000	87667000	81405000	100090000
ZNF207;DKFZp761N202	>tr|J3QRS9|J3QRS9_HUMAN BUB3-interacting and GLEBS motif-containing protein ZNF207 OS=Homo sapiens GN=ZNF207 PE=1 SV=1;>tr|Q59G94|Q59G94_HUMAN Zinc finger protein 207 variant (Fragment) OS=Homo sapiens PE=2 SV=1;>tr|X6R4W8|X6R4W8_HUMAN BUB3-interacting and	BUB3-interacting and GLEBS motif-containing protein ZNF207	52.541	493	0.89054	0.87058	6	0.59865	0.96613	4	10.8	6.7	5	3	235080000	284230000	167380000	273280000
ZNF638	>sp|Q14966|ZN638_HUMAN Zinc finger protein 638 OS=Homo sapiens GN=ZNF638 PE=1 SV=2;>sp|Q14966-3|ZN638_HUMAN Isoform 3 of Zinc finger protein 638 OS=Homo sapiens GN=ZNF638;>tr|A8K583|A8K583_HUMAN cDNA FLJ77126, highly similar to Homo sapiens zinc finger pro	Zinc finger protein 638	220.62	1978	0.87821	0.87006	26	0.70986	1.1963	19	18.9	17.4	29	26	730260000	830790000	636600000	801230000
PC4;SUB1	>tr|Q6IBA2|Q6IBA2_HUMAN PC4 protein OS=Homo sapiens GN=PC4 PE=2 SV=1;>tr|Q59G24|Q59G24_HUMAN Activated RNA polymerase II transcription cofactor 4 variant (Fragment) OS=Homo sapiens PE=2 SV=1;>sp|P53999|TCP4_HUMAN Activated RNA polymerase II transcriptional	Activated RNA polymerase II transcriptional coactivator p15	14.395	127	0.78387	0.86997	19	0.47664	0.85036	17	60.6	46.5	8	8	2133700000	2165600000	1834400000	2736500000
HIST1H1C	>sp|P16403|H12_HUMAN Histone H1.2 OS=Homo sapiens GN=HIST1H1C PE=1 SV=2	Histone H1.2	21.364	213	0.87385	0.86649	10	0.61311	0.95236	8	23.5	20.2	1	1	1920000000	2288600000	766010000	1141800000
SRRM2;KIAA0324	>sp|Q9UQ35|SRRM2_HUMAN Serine/arginine repetitive matrix protein 2 OS=Homo sapiens GN=SRRM2 PE=1 SV=2;>tr|O60382|O60382_HUMAN KIAA0324 (Fragment) OS=Homo sapiens GN=KIAA0324 PE=4 SV=1	Serine/arginine repetitive matrix protein 2	299.61	2752	0.87133	0.8663	7	0.58045	0.99935	5	3.7	3.4	7	7	151050000	174800000	102050000	186870000
H2AFV;H2AFZ	>sp|Q71UI9|H2AV_HUMAN Histone H2A.V OS=Homo sapiens GN=H2AFV PE=1 SV=3;>sp|P0C0S5|H2AZ_HUMAN Histone H2A.Z OS=Homo sapiens GN=H2AFZ PE=1 SV=2;>tr|C9J0D1|C9J0D1_HUMAN Histone H2A OS=Homo sapiens GN=H2AFV PE=3 SV=1;>sp|Q71UI9-4|H2AV_HUMAN Isoform 4 of Histon	Histone H2A.V;Histone H2A.Z;Histone H2A	13.509	128	0.9402	0.86616	5	0.61341	0.90056	6	31.2	53.9	2	3	3997100000	3978200000	2491100000	3533000000
CUL4B;CUL4A	>tr|A6NE76|A6NE76_HUMAN Cullin-4B (Fragment) OS=Homo sapiens GN=CUL4B PE=1 SV=2;>tr|B2RBV7|B2RBV7_HUMAN cDNA, FLJ95721, highly similar to Homo sapiens cullin 4A (CUL4A), mRNA OS=Homo sapiens PE=2 SV=1;>tr|A0A0A0MR50|A0A0A0MR50_HUMAN Cullin-4A OS=Homo sapie	Cullin-4A;Cullin-4B	27.889	234	0.86011	0.86607	2	NA	NA	1	8.1	3.4	2	1	21842000	23579000	11396000	14892000
MTA1	>tr|A0A024R6P5|A0A024R6P5_HUMAN Metastasis associated 1, isoform CRA_c OS=Homo sapiens GN=MTA1 PE=4 SV=1;>tr|E7ESY4|E7ESY4_HUMAN Metastasis-associated protein MTA1 OS=Homo sapiens GN=MTA1 PE=1 SV=1;>sp|Q13330-3|MTA1_HUMAN Isoform 3 of Metastasis-associated	Metastasis-associated protein MTA1	71.208	629	0.79645	0.86581	3	NA	NA	1	7.5	2.1	4	1	70277000	82074000	6326800	9708300
U2AF1;U2AF1L4	>sp|Q01081|U2AF1_HUMAN Splicing factor U2AF 35 kDa subunit OS=Homo sapiens GN=U2AF1 PE=1 SV=3;>tr|B5BU08|B5BU08_HUMAN U2 small nuclear RNA auxillary factor 1 isoform a OS=Homo sapiens GN=U2AF1 PE=2 SV=1;>sp|Q01081-2|U2AF1_HUMAN Isoform 2 of Splicing factor	Splicing factor U2AF 35 kDa subunit;Splicing factor U2AF 26 kDa subunit	27.872	240	0.82809	0.86559	5	0.76053	1.1889	8	27.5	35	7	8	519490000	579620000	468890000	611040000
ZNF346	>tr|B7Z6B6|B7Z6B6_HUMAN Zinc finger protein 346 OS=Homo sapiens GN=ZNF346 PE=1 SV=1;>tr|B7Z6Q2|B7Z6Q2_HUMAN Zinc finger protein 346 OS=Homo sapiens GN=ZNF346 PE=1 SV=1;>tr|D6RJ07|D6RJ07_HUMAN Zinc finger protein 346 OS=Homo sapiens GN=ZNF346 PE=1 SV=1;>sp|	Zinc finger protein 346	14.647	131	0.97277	0.86435	2	NA	NA	1	17.6	8.4	2	1	30913000	34355000	15082000	16129000
C14orf166	>tr|Q5RLJ0|Q5RLJ0_HUMAN CLE OS=Homo sapiens PE=2 SV=1;>tr|Q549M8|Q549M8_HUMAN CLE7 OS=Homo sapiens GN=C14orf166 PE=2 SV=1;>sp|Q9Y224|CN166_HUMAN UPF0568 protein C14orf166 OS=Homo sapiens GN=C14orf166 PE=1 SV=1;>tr|H0YJB9|H0YJB9_HUMAN UPF0568 protein C14orf	UPF0568 protein C14orf166	27.969	244	0.86503	0.86116	5	0.75709	1.2392	5	31.1	29.5	6	6	163390000	184630000	158830000	169350000
HNRNPA3	>sp|P51991|ROA3_HUMAN Heterogeneous nuclear ribonucleoprotein A3 OS=Homo sapiens GN=HNRNPA3 PE=1 SV=2	Heterogeneous nuclear ribonucleoprotein A3	39.594	378	0.80024	0.85979	20	0.73136	1.1573	14	44.2	42.1	3	2	1831000000	2344700000	1464400000	1942200000
RCC2	>tr|A5PLK7|A5PLK7_HUMAN RCC2 protein (Fragment) OS=Homo sapiens GN=RCC2 PE=2 SV=1;>tr|A0A024RAC5|A0A024RAC5_HUMAN Regulator of chromosome condensation 2, isoform CRA_a OS=Homo sapiens GN=RCC2 PE=4 SV=1;>sp|Q9P258|RCC2_HUMAN Protein RCC2 OS=Homo sapiens GN=	Protein RCC2	49.678	457	0.85351	0.85911	4	0.72413	1.1927	5	12.7	19.5	5	7	59508000	71373000	133480000	194390000
WDR33	>sp|Q9C0J8|WDR33_HUMAN pre-mRNA 3 end processing protein WDR33 OS=Homo sapiens GN=WDR33 PE=1 SV=2	pre-mRNA 3 end processing protein WDR33	145.89	1336	0.84212	0.85869	8	0.85712	1.3765	6	8.7	9.2	10	10	294920000	247560000	190430000	345540000
SAFB2	>sp|Q14151|SAFB2_HUMAN Scaffold attachment factor B2 OS=Homo sapiens GN=SAFB2 PE=1 SV=1	Scaffold attachment factor B2	107.47	953	0.84295	0.85825	14	0.94186	1.4953	13	25	25.8	15	15	344930000	398680000	364520000	407730000
NDUFS5	>tr|Q6IBA0|Q6IBA0_HUMAN NADH dehydrogenase (Ubiquinone) Fe-S protein 5, 15kDa (NADH-coenzyme Q reductase) OS=Homo sapiens GN=NDUFS5 PE=2 SV=1;>sp|O43920|NDUS5_HUMAN NADH dehydrogenase [ubiquinone] iron-sulfur protein 5 OS=Homo sapiens GN=NDUFS5 PE=1 SV=3	NADH dehydrogenase [ubiquinone] iron-sulfur protein 5	12.517	106	0.89818	0.85744	2	0.51986	0.82509	2	18.9	16	2	2	19343000	21822000	12277000	18941000
DDX48;EIF4A3	>tr|A0A024R8W0|A0A024R8W0_HUMAN DEAD (Asp-Glu-Ala-Asp) box polypeptide 48, isoform CRA_a OS=Homo sapiens GN=DDX48 PE=3 SV=1;>sp|P38919|IF4A3_HUMAN Eukaryotic initiation factor 4A-III OS=Homo sapiens GN=EIF4A3 PE=1 SV=4	Eukaryotic initiation factor 4A-III;Eukaryotic initiation factor 4A-III, N-terminally processed	46.871	411	0.83657	0.85515	4	0.58331	0.98317	4	12.9	9.5	4	3	76229000	98644000	59635000	80121000
CSNK2B;CSNK2B-LY6G5B-1181;CSNK2B-LY6G5B--991	>tr|N0E4C7|N0E4C7_HUMAN Casein kinase II b subunit splicing isoform 660 OS=Homo sapiens GN=CSNK2B PE=2 SV=1;>tr|Q5SRQ6|Q5SRQ6_HUMAN Casein kinase 2, beta polypeptide, isoform CRA_d OS=Homo sapiens GN=CSNK2B PE=1 SV=2;>sp|P67870|CSK2B_HUMAN Casein kinase II	Casein kinase II subunit beta	24.942	215	0.80974	0.85487	2	0.82073	1.2881	3	9.3	13	2	3	79563000	94770000	93446000	96114000
CBX4	>sp|O00257|CBX4_HUMAN E3 SUMO-protein ligase CBX4 OS=Homo sapiens GN=CBX4 PE=1 SV=3	E3 SUMO-protein ligase CBX4	61.367	560	0.88452	0.85379	2	NA	NA	1	4.6	1.8	2	1	26785000	28805000	523050	2951700
TMPO	>sp|P42166|LAP2A_HUMAN Lamina-associated polypeptide 2, isoform alpha OS=Homo sapiens GN=TMPO PE=1 SV=2	Lamina-associated polypeptide 2, isoform alpha;Thymopoietin;Thymopentin	75.491	694	0.88774	0.85377	38	0.72538	1.1049	32	58.9	58.5	22	20	5256800000	8412400000	4644900000	5395200000
MBD3	>sp|O95983-2|MBD3_HUMAN Isoform 2 of Methyl-CpG-binding domain protein 3 OS=Homo sapiens GN=MBD3;>sp|O95983|MBD3_HUMAN Methyl-CpG-binding domain protein 3 OS=Homo sapiens GN=MBD3 PE=1 SV=1;>tr|B3KMA8|B3KMA8_HUMAN cDNA FLJ10612 fis, clone NT2RP2005358, high	Methyl-CpG-binding domain protein 3	29.014	259	0.9339	0.85276	3	0.84071	1.3811	4	27.4	15.4	5	4	86197000	164930000	70593000	76901000
EEF1B2;LOC392793	>tr|A0A024R3W7|A0A024R3W7_HUMAN Eukaryotic translation elongation factor 1 beta 2, isoform CRA_a OS=Homo sapiens GN=EEF1B2 PE=3 SV=1;>sp|P24534|EF1B_HUMAN Elongation factor 1-beta OS=Homo sapiens GN=EEF1B2 PE=1 SV=3;>tr|A4D1M6|A4D1M6_HUMAN HCG19809 OS=Homo	Elongation factor 1-beta	24.763	225	0.8634	0.85055	3	0.68902	1.031	6	21.8	27.6	4	5	240750000	292350000	465280000	621220000
EEF2	>sp|P13639|EF2_HUMAN Elongation factor 2 OS=Homo sapiens GN=EEF2 PE=1 SV=4;>tr|Q8TA90|Q8TA90_HUMAN Similar to Elongation factor 2b (Fragment) OS=Homo sapiens PE=2 SV=1;>tr|Q6PK56|Q6PK56_HUMAN EEF2 protein (Fragment) OS=Homo sapiens GN=EEF2 PE=2 SV=1	Elongation factor 2	95.337	858	0.8829	0.84976	2	NA	NA	1	2.4	2.3	2	2	30413000	32848000	15682000	20081000
RPL12;hCG_21173	>tr|Q59FI9|Q59FI9_HUMAN Ribosomal protein L12 variant (Fragment) OS=Homo sapiens PE=2 SV=1;>sp|P30050|RL12_HUMAN 60S ribosomal protein L12 OS=Homo sapiens GN=RPL12 PE=1 SV=1;>tr|D3DS95|D3DS95_HUMAN HCG21173, isoform CRA_a OS=Homo sapiens GN=hCG_21173 PE=4	60S ribosomal protein L12	21.483	197	0.91341	0.8486	3	0.61357	0.92476	3	30.5	20.8	4	3	112860000	116760000	92275000	153160000
hCG_2005638;DDX39B	>tr|A0A024RCM3|A0A024RCM3_HUMAN HCG2005638, isoform CRA_a OS=Homo sapiens GN=hCG_2005638 PE=4 SV=1;>sp|Q13838|DX39B_HUMAN Spliceosome RNA helicase DDX39B OS=Homo sapiens GN=DDX39B PE=1 SV=1;>sp|Q13838-2|DX39B_HUMAN Isoform 2 of Spliceosome RNA helicase DDX	Spliceosome RNA helicase DDX39B	48.991	428	0.78742	0.84853	13	0.64713	1.0389	9	42.3	22.2	6	3	489030000	575900000	376140000	520990000
EWSR1	>tr|B0QYK0|B0QYK0_HUMAN RNA-binding protein EWS OS=Homo sapiens GN=EWSR1 PE=1 SV=1;>sp|Q01844-6|EWS_HUMAN Isoform 6 of RNA-binding protein EWS OS=Homo sapiens GN=EWSR1;>sp|Q01844-3|EWS_HUMAN Isoform 3 of RNA-binding protein EWS OS=Homo sapiens GN=EWSR1;>sp	RNA-binding protein EWS	64.929	618	0.76155	0.84763	15	0.52566	0.95549	23	17.2	17.2	1	1	2483500000	2781800000	3151100000	4821000000
hCG_31253;FUBP3	>tr|A0A024R8A7|A0A024R8A7_HUMAN HCG31253, isoform CRA_a OS=Homo sapiens GN=hCG_31253 PE=4 SV=1;>sp|Q96I24|FUBP3_HUMAN Far upstream element-binding protein 3 OS=Homo sapiens GN=FUBP3 PE=1 SV=2;>sp|Q96I24-2|FUBP3_HUMAN Isoform 2 of Far upstream element-bindi	Far upstream element-binding protein 3	61.64	572	0.83974	0.84669	5	0.72887	1.2112	11	21.7	27.6	7	9	257670000	267060000	252470000	377280000
PABPC1;PABPC3	>tr|A0A087WTT1|A0A087WTT1_HUMAN Polyadenylate-binding protein 1 OS=Homo sapiens GN=PABPC1 PE=1 SV=1;>tr|E7ERJ7|E7ERJ7_HUMAN Polyadenylate-binding protein 1 OS=Homo sapiens GN=PABPC1 PE=1 SV=1;>tr|B4DQX0|B4DQX0_HUMAN cDNA FLJ59219, highly similar to Poly(A)	Polyadenylate-binding protein 1;Polyadenylate-binding protein 3	58.535	522	0.94108	0.84652	6	0.80669	1.2608	7	19.9	15.1	4	3	235040000	243120000	163200000	218200000
SF3A3	>tr|B4DW90|B4DW90_HUMAN cDNA FLJ58737, highly similar to Splicing factor 3A subunit 3 OS=Homo sapiens PE=2 SV=1;>tr|B3KY12|B3KY12_HUMAN cDNA FLJ46581 fis, clone THYMU3043200, highly similar to Splicing factor 3A subunit 3 OS=Homo sapiens PE=2 SV=1;>tr|A8K7	Splicing factor 3A subunit 3	52.427	448	0.84131	0.84632	4	0.80505	1.2707	4	8.5	5.6	3	3	73494000	81533000	82179000	101140000
TIAL1	>sp|Q01085-2|TIAR_HUMAN Isoform 2 of Nucleolysin TIAR OS=Homo sapiens GN=TIAL1;>tr|Q2TSD2|Q2TSD2_HUMAN Aging-associated gene 7 protein OS=Homo sapiens PE=2 SV=1;>sp|Q01085|TIAR_HUMAN Nucleolysin TIAR OS=Homo sapiens GN=TIAL1 PE=1 SV=1;>tr|A8K5C4|A8K5C4_HUM	Nucleolysin TIAR	43.448	392	0.92084	0.84619	8	0.60891	0.94637	8	25.8	27	4	5	373580000	387780000	235050000	375080000
PPIL4	>sp|Q8WUA2|PPIL4_HUMAN Peptidyl-prolyl cis-trans isomerase-like 4 OS=Homo sapiens GN=PPIL4 PE=1 SV=1;>tr|Q6P392|Q6P392_HUMAN PPIL4 protein (Fragment) OS=Homo sapiens GN=PPIL4 PE=2 SV=1;>tr|Q32Q83|Q32Q83_HUMAN PPIL4 protein (Fragment) OS=Homo sapiens GN=PPI	Peptidyl-prolyl cis-trans isomerase-like 4	57.224	492	0.85271	0.8461	9	0.71969	1.2104	10	27	31.5	10	11	348830000	403860000	528200000	804410000
RTFDC1	>tr|B2RB99|B2RB99_HUMAN cDNA, FLJ95387 OS=Homo sapiens PE=2 SV=1;>tr|B4DXL5|B4DXL5_HUMAN cDNA FLJ52798 OS=Homo sapiens PE=2 SV=1;>tr|A0A0A0MQR2|A0A0A0MQR2_HUMAN Protein RTF2 homolog OS=Homo sapiens GN=RTFDC1 PE=4 SV=1;>sp|Q9BY42|RTF2_HUMAN Protein RTF2 hom	Protein RTF2 homolog	33.798	306	0.92487	0.84604	2	0.74114	1.2317	5	7.2	16.7	2	4	55319000	59359000	81486000	119640000
RBM25	>sp|P49756|RBM25_HUMAN RNA-binding protein 25 OS=Homo sapiens GN=RBM25 PE=1 SV=3;>sp|P49756-2|RBM25_HUMAN Isoform 2 of RNA-binding protein 25 OS=Homo sapiens GN=RBM25;>sp|P49756-3|RBM25_HUMAN Isoform 3 of RNA-binding protein 25 OS=Homo sapiens GN=RBM25	RNA-binding protein 25	100.18	843	0.74874	0.84159	15	0.65775	1.0575	14	17.6	15.2	14	11	856340000	1062300000	708580000	1001200000
FAM208A	>sp|Q9UK61-3|F208A_HUMAN Isoform 3 of Protein FAM208A OS=Homo sapiens GN=FAM208A;>sp|Q9UK61-4|F208A_HUMAN Isoform 4 of Protein FAM208A OS=Homo sapiens GN=FAM208A;>sp|Q9UK61|F208A_HUMAN Protein FAM208A OS=Homo sapiens GN=FAM208A PE=1 SV=3;>sp|Q9UK61-2|F208A	Protein FAM208A	170.81	1512	0.84603	0.84037	52	0.8529	1.3956	38	31.4	33.9	10	11	2133600000	2476700000	1794200000	1903300000
RBM8;RBM8A	>tr|A0A023T787|A0A023T787_HUMAN RNA-binding protein 8A OS=Homo sapiens GN=RBM8 PE=2 SV=1;>sp|Q9Y5S9-2|RBM8A_HUMAN Isoform 2 of RNA-binding protein 8A OS=Homo sapiens GN=RBM8A;>sp|Q9Y5S9|RBM8A_HUMAN RNA-binding protein 8A OS=Homo sapiens GN=RBM8A PE=1 SV=1	RNA-binding protein 8A	19.889	174	0.87347	0.83869	2	0.61667	0.98157	4	10.9	20.7	2	4	74109000	47507000	74883000	130510000
ZNF326	>sp|Q5BKZ1|ZN326_HUMAN DBIRD complex subunit ZNF326 OS=Homo sapiens GN=ZNF326 PE=1 SV=2	DBIRD complex subunit ZNF326	65.653	582	0.81607	0.83807	4	0.64702	1.0118	5	8.2	9.8	5	5	83405000	103200000	83974000	123570000
ZNF609	>sp|O15014|ZN609_HUMAN Zinc finger protein 609 OS=Homo sapiens GN=ZNF609 PE=1 SV=2;>tr|E7ERY8|E7ERY8_HUMAN Zinc finger protein 609 OS=Homo sapiens GN=ZNF609 PE=1 SV=1;>tr|A5PKW6|A5PKW6_HUMAN ZNF609 protein OS=Homo sapiens GN=ZNF609 PE=2 SV=1	Zinc finger protein 609	151.19	1411	0.88225	0.83798	3	NA	NA	1	2.6	1.7	2	2	33709000	34080000	8518000	8672800
TRIM28	>tr|B2R8R5|B2R8R5_HUMAN cDNA, FLJ94025, highly similar to Homo sapiens tripartite motif-containing 28 (TRIM28), mRNA OS=Homo sapiens PE=2 SV=1;>sp|Q13263|TIF1B_HUMAN Transcription intermediary factor 1-beta OS=Homo sapiens GN=TRIM28 PE=1 SV=5;>sp|Q13263-2|	Transcription intermediary factor 1-beta	88.559	835	0.85883	0.83796	19	1.1171	1.8277	15	21.7	21.7	18	17	687910000	802220000	706330000	621280000
SAFB	>tr|B7ZLP5|B7ZLP5_HUMAN SAFB protein OS=Homo sapiens GN=SAFB PE=2 SV=1;>tr|A8K329|A8K329_HUMAN cDNA FLJ76656, highly similar to Homo sapiens scaffold attachment factor B (SAFB), mRNA OS=Homo sapiens PE=2 SV=1;>sp|Q15424|SAFB1_HUMAN Scaffold attachment fact	Scaffold attachment factor B1	102.58	914	0.82222	0.83757	31	0.86268	1.332	33	29.3	24.8	18	16	1442500000	1753400000	1600700000	1834100000
NUFIP2	>tr|A1L3A7|A1L3A7_HUMAN Nuclear fragile X mental retardation protein interacting protein 2 OS=Homo sapiens GN=NUFIP2 PE=2 SV=1;>sp|Q7Z417|NUFP2_HUMAN Nuclear fragile X mental retardation-interacting protein 2 OS=Homo sapiens GN=NUFIP2 PE=1 SV=1	Nuclear fragile X mental retardation-interacting protein 2	76.12	695	0.88024	0.83702	27	0.82861	1.2618	24	42.2	41.4	23	22	1508400000	1696500000	2029900000	2375800000
ATP2A2;DKFZp779G2251;ATP2A1	>sp|P16615-5|AT2A2_HUMAN Isoform 5 of Sarcoplasmic/endoplasmic reticulum calcium ATPase 2 OS=Homo sapiens GN=ATP2A2;>sp|P16615-2|AT2A2_HUMAN Isoform 2 of Sarcoplasmic/endoplasmic reticulum calcium ATPase 2 OS=Homo sapiens GN=ATP2A2;>sp|P16615-3|AT2A2_HUMAN	Sarcoplasmic/endoplasmic reticulum calcium ATPase 2;Sarcoplasmic/endoplasmic reticulum calcium ATPase 1	109.73	997	0.93574	0.83634	2	NA	NA	1	3	1.1	2	1	26642000	37016000	2603300	5211600
SLTM	>tr|H7BXE3|H7BXE3_HUMAN SAFB-like transcription modulator (Fragment) OS=Homo sapiens GN=SLTM PE=1 SV=1;>tr|A0A024R5X3|A0A024R5X3_HUMAN SAFB-like, transcription modulator, isoform CRA_b OS=Homo sapiens GN=SLTM PE=4 SV=1;>sp|Q9NWH9|SLTM_HUMAN SAFB-like trans	SAFB-like transcription modulator	48.848	453	0.84939	0.83632	2	NA	NA	0	4.9	0	2	0	25320000	15768000	0	0
MYL12A;MYL12B	>tr|J3QRS3|J3QRS3_HUMAN Myosin regulatory light chain 12A OS=Homo sapiens GN=MYL12A PE=4 SV=1;>sp|P19105|ML12A_HUMAN Myosin regulatory light chain 12A OS=Homo sapiens GN=MYL12A PE=1 SV=2;>sp|O14950|ML12B_HUMAN Myosin regulatory light chain 12B OS=Homo sapi	Myosin regulatory light chain 12A;Myosin regulatory light chain 12B	20.457	177	0.81919	0.83544	3	1.0739	1.8524	2	22	15.8	3	2	69489000	89079000	37450000	37274000
HNRPF;HNRNPF	>tr|A0A024R7T3|A0A024R7T3_HUMAN Heterogeneous nuclear ribonucleoprotein F, isoform CRA_a OS=Homo sapiens GN=HNRPF PE=4 SV=1;>sp|P52597|HNRPF_HUMAN Heterogeneous nuclear ribonucleoprotein F OS=Homo sapiens GN=HNRNPF PE=1 SV=3;>tr|B4DKS8|B4DKS8_HUMAN cDNA FL	Heterogeneous nuclear ribonucleoprotein F;Heterogeneous nuclear ribonucleoprotein F, N-terminally processed	45.671	415	0.86823	0.8353	2	0.69926	1.1122	4	14.5	20.2	2	4	55966000	67653000	106930000	136510000
NUDT21	>tr|B2R6U8|B2R6U8_HUMAN cDNA, FLJ93125, highly similar to Homo sapiens cleavage and polyadenylation specific factor 5, 25 kDa(CPSF5), mRNA OS=Homo sapiens PE=2 SV=1;>tr|A0A024R6W2|A0A024R6W2_HUMAN Nudix (Nucleoside diphosphate linked moiety X)-type motif 2	Cleavage and polyadenylation specificity factor subunit 5	26.215	227	0.77917	0.83456	4	0.50479	0.79845	4	22	25.1	4	5	110370000	136770000	74955000	153530000
SF1	>tr|A0A024R566|A0A024R566_HUMAN Splicing factor 1, isoform CRA_a OS=Homo sapiens GN=SF1 PE=4 SV=1;>sp|Q15637-6|SF01_HUMAN Isoform 6 of Splicing factor 1 OS=Homo sapiens GN=SF1;>tr|A0A024R5D9|A0A024R5D9_HUMAN Splicing factor 1, isoform CRA_c OS=Homo sapiens	Splicing factor 1	61.888	571	0.80229	0.832	12	0.55695	0.9879	12	32.4	29.4	1	1	918540000	1154800000	658780000	1013500000
NOP58	>sp|Q9Y2X3|NOP58_HUMAN Nucleolar protein 58 OS=Homo sapiens GN=NOP58 PE=1 SV=1;>tr|B3KN82|B3KN82_HUMAN cDNA FLJ13913 fis, clone Y79AA1000231, highly similar to Nucleolar protein NOP5 OS=Homo sapiens PE=2 SV=1	Nucleolar protein 58	59.578	529	0.828	0.83191	38	0.64833	0.99294	20	51.8	39.9	21	16	3239500000	4085600000	1240100000	1802900000
HEL162;STRBP	>tr|V9HWK4|V9HWK4_HUMAN Epididymis luminal protein 162 OS=Homo sapiens GN=HEL162 PE=2 SV=1;>sp|Q96SI9-2|STRBP_HUMAN Isoform 2 of Spermatid perinuclear RNA-binding protein OS=Homo sapiens GN=STRBP;>sp|Q96SI9|STRBP_HUMAN Spermatid perinuclear RNA-binding pro	Spermatid perinuclear RNA-binding protein	73.652	672	0.90197	0.83066	4	0.83675	1.2892	3	11.3	9.2	4	3	190560000	227070000	192510000	229550000
LDHB	>tr|A8MW50|A8MW50_HUMAN L-lactate dehydrogenase (Fragment) OS=Homo sapiens GN=LDHB PE=1 SV=1;>tr|Q5U077|Q5U077_HUMAN L-lactate dehydrogenase OS=Homo sapiens GN=LDHB PE=2 SV=1;>sp|P07195|LDHB_HUMAN L-lactate dehydrogenase B chain OS=Homo sapiens GN=LDHB PE=	L-lactate dehydrogenase;L-lactate dehydrogenase B chain	25.218	232	0.92909	0.82567	3	1.2775	2.0032	4	15.1	20.3	2	2	69592000	59271000	38949000	38346000
RBM4	>sp|Q9BWF3|RBM4_HUMAN RNA-binding protein 4 OS=Homo sapiens GN=RBM4 PE=1 SV=1;>tr|E9PB51|E9PB51_HUMAN RNA-binding protein 4 (Fragment) OS=Homo sapiens GN=RBM4 PE=1 SV=1;>tr|A8K9U0|A8K9U0_HUMAN cDNA FLJ78260, highly similar to Homo sapiens RNA binding motif	RNA-binding protein 4	40.313	364	0.81047	0.824	17	0.80407	1.2765	20	56.9	54.9	1	1	983710000	1211600000	1205100000	1432300000
RPS3A	>tr|Q6NXR8|Q6NXR8_HUMAN 40S ribosomal protein S3a OS=Homo sapiens GN=RPS3A PE=2 SV=1;>tr|A8K4W0|A8K4W0_HUMAN 40S ribosomal protein S3a OS=Homo sapiens GN=RPS3A PE=2 SV=1;>sp|P61247|RS3A_HUMAN 40S ribosomal protein S3a OS=Homo sapiens GN=RPS3A PE=1 SV=2;>tr	40S ribosomal protein S3a	29.975	264	0.79361	0.82325	13	0.845	1.3404	16	46.2	41.7	13	10	686810000	854870000	934410000	1161900000
PCBP2;PCBP3	>tr|H3BRU6|H3BRU6_HUMAN Poly(rC)-binding protein 2 (Fragment) OS=Homo sapiens GN=PCBP2 PE=1 SV=1;>tr|F8VZX2|F8VZX2_HUMAN Poly(rC)-binding protein 2 OS=Homo sapiens GN=PCBP2 PE=1 SV=1;>tr|B4DXP5|B4DXP5_HUMAN Poly(rC)-binding protein 2 OS=Homo sapiens GN=PCB	Poly(rC)-binding protein 2;Poly(rC)-binding protein 3	31.6	301	0.85998	0.82308	3	0.64802	0.97737	6	18.6	27.2	3	5	189050000	213570000	361770000	481290000
SNRPG;SNRPGP15	>tr|Q49AN9|Q49AN9_HUMAN SNRPG protein OS=Homo sapiens GN=SNRPG PE=2 SV=1;>tr|F5H013|F5H013_HUMAN Small nuclear ribonucleoprotein G OS=Homo sapiens GN=SNRPG PE=4 SV=1;>sp|P62308|RUXG_HUMAN Small nuclear ribonucleoprotein G OS=Homo sapiens GN=SNRPG PE=1 SV=1	Small nuclear ribonucleoprotein G;Putative small nuclear ribonucleoprotein G-like protein 15	7.1013	64	0.81572	0.82214	3	0.7641	1.2453	2	31.2	20.3	3	2	108380000	135340000	53802000	68435000
HEL103;SRP72	>tr|V9HWK0|V9HWK0_HUMAN Signal recognition particle subunit SRP72 OS=Homo sapiens GN=HEL103 PE=2 SV=1;>sp|O76094|SRP72_HUMAN Signal recognition particle subunit SRP72 OS=Homo sapiens GN=SRP72 PE=1 SV=3;>tr|Q71V07|Q71V07_HUMAN Signal recognition particle su	Signal recognition particle subunit SRP72	74.605	671	0.87941	0.81905	9	0.76776	1.2068	11	21.9	16.8	11	10	273940000	308030000	287600000	345170000
SFRS3;SRSF3	>tr|B2R6F3|B2R6F3_HUMAN Splicing factor arginine/serine-rich 3 OS=Homo sapiens GN=SFRS3 PE=2 SV=1;>sp|P84103-2|SRSF3_HUMAN Isoform 2 of Serine/arginine-rich splicing factor 3 OS=Homo sapiens GN=SRSF3;>sp|P84103|SRSF3_HUMAN Serine/arginine-rich splicing fac	Serine/arginine-rich splicing factor 3	19.329	164	0.7913	0.81827	3	0.40949	0.67183	4	26.2	23.2	3	3	454430000	663550000	531500000	1084200000
SMCHD1	>sp|A6NHR9|SMHD1_HUMAN Structural maintenance of chromosomes flexible hinge domain-containing protein 1 OS=Homo sapiens GN=SMCHD1 PE=1 SV=2;>sp|A6NHR9-2|SMHD1_HUMAN Isoform 2 of Structural maintenance of chromosomes flexible hinge domain-containing protein	Structural maintenance of chromosomes flexible hinge domain-containing protein 1	226.37	2005	0.8033	0.8178	9	0.78221	1.2692	4	6.1	2.4	11	5	187770000	197830000	44630000	57830000
RPL22	>tr|Q7Z4W8|Q7Z4W8_HUMAN Heparin-binding protein HBp15 OS=Homo sapiens PE=2 SV=1;>sp|P35268|RL22_HUMAN 60S ribosomal protein L22 OS=Homo sapiens GN=RPL22 PE=1 SV=2;>tr|K7EJT5|K7EJT5_HUMAN 60S ribosomal protein L22 (Fragment) OS=Homo sapiens GN=RPL22 PE=1 SV	60S ribosomal protein L22	14.818	128	0.86349	0.81718	3	0.70413	1.1027	3	39.1	39.1	3	3	100160000	124660000	91351000	164590000
SNRPC	>tr|Q5TAL4|Q5TAL4_HUMAN U1 small nuclear ribonucleoprotein C OS=Homo sapiens GN=SNRPC PE=2 SV=1;>tr|A0A0A0MRR7|A0A0A0MRR7_HUMAN U1 small nuclear ribonucleoprotein C OS=Homo sapiens GN=SNRPC PE=4 SV=1;>sp|P09234|RU1C_HUMAN U1 small nuclear ribonucleoprotein	U1 small nuclear ribonucleoprotein C	17.394	159	0.82851	0.81715	5	0.73562	1.1093	4	30.2	24.5	4	3	2090200000	2463200000	2117300000	2414100000
RP9	>tr|A0A090N8Z0|A0A090N8Z0_HUMAN Retinitis pigmentosa 9 (Autosomal dominant) OS=Homo sapiens GN=RP9 PE=4 SV=1;>tr|A0A090N8G7|A0A090N8G7_HUMAN Similar to RP9 protein OS=Homo sapiens GN=LOC402478 PE=4 SV=1;>sp|Q8TA86|RP9_HUMAN Retinitis pigmentosa 9 protein O	Retinitis pigmentosa 9 protein	26.106	221	0.84266	0.81674	6	0.61121	0.97053	4	18.1	21.3	5	5	77020000	83674000	79850000	112650000
SMARCC2	>tr|Q59G16|Q59G16_HUMAN SWI/SNF-related matrix-associated actin-dependent regulator of chromatin c2 isoform b variant (Fragment) OS=Homo sapiens PE=2 SV=1;>tr|A0A024RB22|A0A024RB22_HUMAN SWI/SNF related, matrix associated, actin dependent regulator of chro	SWI/SNF complex subunit SMARCC2	127.38	1156	0.80944	0.81499	15	0.72509	1.1584	13	15.7	14.8	8	9	399160000	484880000	358360000	471150000
CIC	>tr|I3L2J0|I3L2J0_HUMAN Protein capicua homolog OS=Homo sapiens GN=CIC PE=1 SV=1		257.75	2514	0.78568	0.81263	7	0.68748	1.0408	5	6.2	4.1	11	7	213050000	245590000	89814000	167750000
SERF2	>sp|P84101-4|SERF2_HUMAN Isoform 4 of Small EDRK-rich factor 2 OS=Homo sapiens GN=SERF2;>sp|P84101|SERF2_HUMAN Small EDRK-rich factor 2 OS=Homo sapiens GN=SERF2 PE=1 SV=1;>tr|F8WBN3|F8WBN3_HUMAN Small EDRK-rich factor 2 OS=Homo sapiens GN=SERF2 PE=1 SV=1;>	Small EDRK-rich factor 2	5.2159	45	0.72264	0.81085	3	0.90303	1.52	6	44.4	46.7	3	4	203410000	189180000	354280000	387300000
BRD7	>sp|Q9NPI1|BRD7_HUMAN Bromodomain-containing protein 7 OS=Homo sapiens GN=BRD7 PE=1 SV=1;>sp|Q9NPI1-2|BRD7_HUMAN Isoform 2 of Bromodomain-containing protein 7 OS=Homo sapiens GN=BRD7;>tr|A0A024R6Q8|A0A024R6Q8_HUMAN Bromodomain containing 7, isoform CRA_b O	Bromodomain-containing protein 7	74.138	651	0.86835	0.81081	3	0.6517	1.0137	2	5.2	4.5	3	2	75529000	77164000	46133000	54314000
MPHOSPH1;KIF20B	>tr|D3DR32|D3DR32_HUMAN Kinesin-like protein OS=Homo sapiens GN=MPHOSPH1 PE=3 SV=1;>sp|Q96Q89-4|KI20B_HUMAN Isoform 4 of Kinesin-like protein KIF20B OS=Homo sapiens GN=KIF20B;>sp|Q96Q89-3|KI20B_HUMAN Isoform 3 of Kinesin-like protein KIF20B OS=Homo sapiens	Kinesin-like protein KIF20B	206.16	1780	0.88556	0.80939	3	0.64608	1.0189	2	2.1	1.3	3	2	40717000	43822000	20135000	25770000
RBBP4;RBBP7	>sp|Q09028-3|RBBP4_HUMAN Isoform 3 of Histone-binding protein RBBP4 OS=Homo sapiens GN=RBBP4;>sp|Q09028|RBBP4_HUMAN Histone-binding protein RBBP4 OS=Homo sapiens GN=RBBP4 PE=1 SV=3;>tr|A8K6A2|A8K6A2_HUMAN cDNA FLJ77317, highly similar to Homo sapiens retin	Histone-binding protein RBBP4	46.158	410	0.75605	0.80686	3	0.82447	1.3329	4	11	7.6	1	0	86332000	168850000	63212000	106940000
HIST2H2AC;HIST2H2AA3	>sp|Q16777|H2A2C_HUMAN Histone H2A type 2-C OS=Homo sapiens GN=HIST2H2AC PE=1 SV=4;>sp|Q6FI13|H2A2A_HUMAN Histone H2A type 2-A OS=Homo sapiens GN=HIST2H2AA3 PE=1 SV=3	Histone H2A type 2-C;Histone H2A type 2-A	13.988	129	0.76037	0.8068	5	0.5036	0.73034	7	58.1	49.6	1	1	1248000000	1445500000	3817500000	6401000000
SRSF9	>sp|Q13242|SRSF9_HUMAN Serine/arginine-rich splicing factor 9 OS=Homo sapiens GN=SRSF9 PE=1 SV=1;>tr|A8K3M9|A8K3M9_HUMAN cDNA FLJ76387, highly similar to Homo sapiens splicing factor, arginine/serine-rich 9 (SFRS9), mRNA OS=Homo sapiens PE=2 SV=1;>tr|H0YIB	Serine/arginine-rich splicing factor 9	25.542	221	0.7768	0.80595	24	0.74657	1.1575	26	62.4	62.4	15	16	3549500000	4235200000	3583400000	4617800000
SNRPN;SNRPB	>tr|J3QLE5|J3QLE5_HUMAN Small nuclear ribonucleoprotein-associated protein N (Fragment) OS=Homo sapiens GN=SNRPN PE=4 SV=1;>tr|Q6LBS1|Q6LBS1_HUMAN SmB /B autoimmune antigene (Fragment) OS=Homo sapiens PE=2 SV=1;>tr|Q66K91|Q66K91_HUMAN Small nuclear ribonu	Small nuclear ribonucleoprotein-associated protein;Small nuclear ribonucleoprotein-associated proteins B and B;Small nuclear ribonucleoprotein-associated protein N	17.546	169	0.8296	0.80429	2	NA	NA	1	8.9	4.1	2	1	31567000	35752000	10524000	10792000
SNRP70;SNRNP70	>tr|A8KAQ5|A8KAQ5_HUMAN cDNA FLJ77404, highly similar to Homo sapiens small nuclear ribonucleoprotein 70kDa polypeptide (RNP antigen) (SNRP70), transcript variant 1, mRNA OS=Homo sapiens PE=2 SV=1;>tr|A0A024QZD5|A0A024QZD5_HUMAN Small nuclear ribonucleopro	U1 small nuclear ribonucleoprotein 70 kDa	51.495	437	0.83223	0.80407	3	0.62442	0.98809	4	7.1	10.8	3	4	38111000	52804000	32195000	38407000
THOC2	>sp|Q8NI27|THOC2_HUMAN THO complex subunit 2 OS=Homo sapiens GN=THOC2 PE=1 SV=2	THO complex subunit 2	182.77	1593	0.82397	0.80334	57	0.7768	1.2241	46	33.8	27.1	37	31	3186400000	3849200000	2342800000	2876300000
HDAC2	>sp|Q92769-3|HDAC2_HUMAN Isoform 2 of Histone deacetylase 2 OS=Homo sapiens GN=HDAC2;>sp|Q92769|HDAC2_HUMAN Histone deacetylase 2 OS=Homo sapiens GN=HDAC2 PE=1 SV=2;>tr|B3KUJ5|B3KUJ5_HUMAN Histone deacetylase OS=Homo sapiens PE=2 SV=1	Histone deacetylase 2;Histone deacetylase	51.998	458	0.83947	0.80177	4	NA	NA	1	11.1	1.7	3	1	93075000	89439000	5796000	6472100
SFPQ	>sp|P23246|SFPQ_HUMAN Splicing factor, proline- and glutamine-rich OS=Homo sapiens GN=SFPQ PE=1 SV=2;>tr|Q9BSV4|Q9BSV4_HUMAN SFPQ protein (Fragment) OS=Homo sapiens GN=SFPQ PE=2 SV=2;>tr|Q86VG2|Q86VG2_HUMAN Splicing factor proline/glutamine-rich (Polypyrim	Splicing factor, proline- and glutamine-rich	76.149	707	0.77523	0.80137	41	0.75444	1.1874	38	38.5	40	25	24	5024000000	6390100000	3871500000	4717000000
HNRNPM;ORF	>tr|A0A087X0X3|A0A087X0X3_HUMAN Heterogeneous nuclear ribonucleoprotein M OS=Homo sapiens GN=HNRNPM PE=1 SV=1;>sp|P52272-2|HNRPM_HUMAN Isoform 2 of Heterogeneous nuclear ribonucleoprotein M OS=Homo sapiens GN=HNRNPM;>sp|P52272|HNRPM_HUMAN Heterogeneous nuc	Heterogeneous nuclear ribonucleoprotein M	77.569	730	0.81633	0.8004	27	0.78584	1.2216	19	36.6	32.6	24	21	1198200000	1402800000	874000000	1106700000
SMARCE1	>tr|J3QKS7|J3QKS7_HUMAN SWI/SNF-related matrix-associated actin-dependent regulator of chromatin subfamily E member 1 (Fragment) OS=Homo sapiens GN=SMARCE1 PE=1 SV=1;>tr|B4DGM3|B4DGM3_HUMAN SWI/SNF-related matrix-associated actin-dependent regulator of chr	SWI/SNF-related matrix-associated actin-dependent regulator of chromatin subfamily E member 1	33.433	288	0.78517	0.79881	3	0.65238	1.0586	2	13.2	8	3	2	50937000	56455000	28717000	39615000
HSPD1	>tr|B7Z5E7|B7Z5E7_HUMAN cDNA FLJ51046, highly similar to 60 kDa heat shock protein, mitochondrial OS=Homo sapiens PE=2 SV=1;>tr|B7Z4F6|B7Z4F6_HUMAN cDNA FLJ54912, highly similar to 60 kDa heat shock protein, mitochondrial OS=Homo sapiens PE=2 SV=1;>tr|B7Z5	60 kDa heat shock protein, mitochondrial	55.083	517	0.82743	0.79632	3	0.71183	1.0929	2	11.4	6.6	3	2	111310000	150970000	44316000	44661000
ILF2	>tr|B4DY09|B4DY09_HUMAN Interleukin enhancer-binding factor 2 OS=Homo sapiens GN=ILF2 PE=1 SV=1;>tr|Q53FG3|Q53FG3_HUMAN Interleukin enhancer binding factor 2 variant (Fragment) OS=Homo sapiens PE=2 SV=1;>tr|F4ZW62|F4ZW62_HUMAN NF45 OS=Homo sapiens PE=2 SV=	Interleukin enhancer-binding factor 2	38.91	352	0.79577	0.79571	7	0.66118	1.0529	5	26.4	20.7	7	6	166660000	183450000	102560000	145060000
EEF1A1;EEF1A1P5;EEF1A1L14;EEF1A2;PTI-1	>tr|Q6IPT9|Q6IPT9_HUMAN Elongation factor 1-alpha OS=Homo sapiens GN=EEF1A1 PE=2 SV=1;>tr|Q6IPS9|Q6IPS9_HUMAN Elongation factor 1-alpha OS=Homo sapiens GN=EEF1A1 PE=2 SV=1;>tr|Q6IPN6|Q6IPN6_HUMAN Elongation factor 1-alpha OS=Homo sapiens GN=EEF1A1 PE=2 SV=	Elongation factor 1-alpha;Putative elongation factor 1-alpha-like 3;Elongation factor 1-alpha 1;Elongation factor 1-alpha 2	50.184	462	0.80786	0.79473	14	0.7404	1.0548	18	37.2	43.5	12	13	2874700000	3706300000	3056200000	4173500000
SF3A1	>tr|A0A024R1K8|A0A024R1K8_HUMAN Splicing factor 3a, subunit 1, 120kDa, isoform CRA_a OS=Homo sapiens GN=SF3A1 PE=4 SV=1;>sp|Q15459|SF3A1_HUMAN Splicing factor 3A subunit 1 OS=Homo sapiens GN=SF3A1 PE=1 SV=1;>sp|Q15459-2|SF3A1_HUMAN Isoform 2 of Splicing fa	Splicing factor 3A subunit 1	88.885	793	0.78666	0.79244	26	0.93852	1.4907	23	43.9	32.7	25	21	1701700000	1855800000	1522600000	1399700000
HMGN1	>tr|F2Z2W6|F2Z2W6_HUMAN Non-histone chromosomal protein HMG-14 OS=Homo sapiens GN=HMGN1 PE=1 SV=1;>tr|F2Z2Y5|F2Z2Y5_HUMAN Non-histone chromosomal protein HMG-14 OS=Homo sapiens GN=HMGN1 PE=1 SV=1;>tr|H7BXJ5|H7BXJ5_HUMAN Non-histone chromosomal protein HMG-	Non-histone chromosomal protein HMG-14	4.7446	44	0.68995	0.79207	4	0.59204	1.0057	4	31.8	50	2	3	216860000	299230000	71197000	110170000
DKC1	>sp|O60832|DKC1_HUMAN H/ACA ribonucleoprotein complex subunit 4 OS=Homo sapiens GN=DKC1 PE=1 SV=3;>sp|O60832-2|DKC1_HUMAN Isoform 3 of H/ACA ribonucleoprotein complex subunit 4 OS=Homo sapiens GN=DKC1;>tr|C9IYT0|C9IYT0_HUMAN H/ACA ribonucleoprotein complex	H/ACA ribonucleoprotein complex subunit 4	57.673	514	0.81722	0.79175	13	0.68478	1.0504	5	27.2	11.3	12	5	353320000	428340000	88273000	140180000
HSP90AB1	>tr|B4DMA2|B4DMA2_HUMAN cDNA FLJ54023, highly similar to Heat shock protein HSP 90-beta OS=Homo sapiens PE=2 SV=1;>tr|A0A024RD80|A0A024RD80_HUMAN Heat shock protein 90kDa alpha (Cytosolic), class B member 1, isoform CRA_a OS=Homo sapiens GN=HSP90AB1 PE=3 S	Heat shock protein HSP 90-beta	79.194	686	0.77701	0.79125	4	0.7393	1.1225	3	17.6	15.9	4	2	388230000	357200000	307600000	331540000
CCAR1	>sp|Q8IX12-2|CCAR1_HUMAN Isoform 2 of Cell division cycle and apoptosis regulator protein 1 OS=Homo sapiens GN=CCAR1;>sp|Q8IX12|CCAR1_HUMAN Cell division cycle and apoptosis regulator protein 1 OS=Homo sapiens GN=CCAR1 PE=1 SV=2;>tr|F5H2E6|F5H2E6_HUMAN Cel	Cell division cycle and apoptosis regulator protein 1	131.04	1135	0.85709	0.79124	3	0.56571	0.91733	4	3.1	3.6	4	4	61550000	70949000	44639000	79691000
UBAP2L	>sp|Q14157-4|UBP2L_HUMAN Isoform 4 of Ubiquitin-associated protein 2-like OS=Homo sapiens GN=UBAP2L;>sp|Q14157-1|UBP2L_HUMAN Isoform 2 of Ubiquitin-associated protein 2-like OS=Homo sapiens GN=UBAP2L;>tr|B4DZJ6|B4DZJ6_HUMAN cDNA FLJ54706, highly similar to	Ubiquitin-associated protein 2-like	103.17	976	0.81518	0.78919	9	0.93691	1.4663	13	15.7	23.2	1	1	415410000	489810000	704350000	638000000
RCC1	>tr|Q5T081|Q5T081_HUMAN CHC1 protein OS=Homo sapiens GN=RCC1 PE=2 SV=1;>sp|P18754|RCC1_HUMAN Regulator of chromosome condensation OS=Homo sapiens GN=RCC1 PE=1 SV=1;>sp|P18754-2|RCC1_HUMAN Isoform 2 of Regulator of chromosome condensation OS=Homo sapiens GN	Regulator of chromosome condensation	44.969	421	0.82187	0.78642	6	0.57924	0.96054	3	22.3	13.3	7	5	149490000	163010000	101400000	159980000
LBR	>tr|A0A024R3R5|A0A024R3R5_HUMAN Lamin B receptor, isoform CRA_a OS=Homo sapiens GN=LBR PE=4 SV=1;>sp|Q14739|LBR_HUMAN Lamin-B receptor OS=Homo sapiens GN=LBR PE=1 SV=2;>tr|C9JXK0|C9JXK0_HUMAN Lamin-B receptor (Fragment) OS=Homo sapiens GN=LBR PE=1 SV=1;>tr	Lamin-B receptor	70.729	615	0.75533	0.78628	4	0.80153	1.3605	3	6.8	5	4	3	69468000	57341000	20501000	22904000
SRSF7	>tr|B4DEK2|B4DEK2_HUMAN cDNA FLJ59182, highly similar to Splicing factor, arginine/serine-rich 7 OS=Homo sapiens PE=2 SV=1;>tr|C9JAB2|C9JAB2_HUMAN Serine/arginine-rich-splicing factor 7 OS=Homo sapiens GN=SRSF7 PE=1 SV=1;>sp|Q16629-3|SRSF7_HUMAN Isoform 3	Serine/arginine-rich splicing factor 7	18.815	165	0.79878	0.78516	2	0.65632	1.0602	2	21.2	19.4	2	2	89923000	102490000	29001000	50394000
CDKN2AIP	>sp|Q9NXV6|CARF_HUMAN CDKN2A-interacting protein OS=Homo sapiens GN=CDKN2AIP PE=1 SV=3;>tr|B3KTW3|B3KTW3_HUMAN cDNA FLJ38861 fis, clone MESAN2011984, highly similar to Homo sapiens collaborates/cooperates with ARF (alternate reading frame) protein (CARF),	CDKN2A-interacting protein	61.124	580	0.76805	0.77953	3	0.89434	1.319	3	9.5	8.4	4	4	38510000	42026000	47611000	49421000
SNRPD3	>sp|P62318-2|SMD3_HUMAN Isoform 2 of Small nuclear ribonucleoprotein Sm D3 OS=Homo sapiens GN=SNRPD3;>sp|P62318|SMD3_HUMAN Small nuclear ribonucleoprotein Sm D3 OS=Homo sapiens GN=SNRPD3 PE=1 SV=1	Small nuclear ribonucleoprotein Sm D3	13.291	120	0.79906	0.77396	2	0.79724	1.2561	2	15.8	15.8	2	2	91122000	102590000	78870000	79837000
KPNB1	>tr|B2RBR9|B2RBR9_HUMAN cDNA, FLJ95650, highly similar to Homo sapiens karyopherin (importin) beta 1 (KPNB1), mRNA OS=Homo sapiens PE=2 SV=1;>sp|Q14974|IMB1_HUMAN Importin subunit beta-1 OS=Homo sapiens GN=KPNB1 PE=1 SV=2;>tr|J3QR48|J3QR48_HUMAN Importin s	Importin subunit beta-1	97.183	876	0.80778	0.77308	4	NA	NA	1	6.1	2.4	4	2	106730000	144180000	12358000	21559000
ACTG1;PS1TP5BP1;ACTB	>sp|P63261|ACTG_HUMAN Actin, cytoplasmic 2 OS=Homo sapiens GN=ACTG1 PE=1 SV=1;>tr|Q8WVW5|Q8WVW5_HUMAN Putative uncharacterized protein (Fragment) OS=Homo sapiens PE=2 SV=1;>tr|Q53GK6|Q53GK6_HUMAN Beta actin variant (Fragment) OS=Homo sapiens PE=2 SV=1;>tr|	Actin, cytoplasmic 2;Actin, cytoplasmic 2, N-terminally processed;Actin, cytoplasmic 1;Actin, cytoplasmic 1, N-terminally processed	41.792	375	0.78466	0.77265	35	0.58095	0.88797	31	79.7	65.9	11	9	4319800000	5626000000	3200200000	5494500000
AHCTF1	>sp|Q8WYP5|ELYS_HUMAN Protein ELYS OS=Homo sapiens GN=AHCTF1 PE=1 SV=3;>sp|Q8WYP5-3|ELYS_HUMAN Isoform 3 of Protein ELYS OS=Homo sapiens GN=AHCTF1;>sp|Q8WYP5-2|ELYS_HUMAN Isoform 2 of Protein ELYS OS=Homo sapiens GN=AHCTF1;>tr|B3KVE5|B3KVE5_HUMAN cDNA FLJ1	Protein ELYS	252.5	2266	0.79069	0.76862	68	0.80587	1.2557	49	37	24.9	68	47	6161200000	5194700000	2799000000	2870600000
HP1BP3	>sp|Q5SSJ5|HP1B3_HUMAN Heterochromatin protein 1-binding protein 3 OS=Homo sapiens GN=HP1BP3 PE=1 SV=1;>tr|X6RGJ2|X6RGJ2_HUMAN Heterochromatin protein 1-binding protein 3 (Fragment) OS=Homo sapiens GN=HP1BP3 PE=1 SV=1;>sp|Q5SSJ5-2|HP1B3_HUMAN Isoform 2 of	Heterochromatin protein 1-binding protein 3	61.206	553	0.71913	0.76844	12	0.82534	1.3109	6	22.6	14.8	14	8	665890000	843480000	205030000	249240000
CS	>tr|B4DJV2|B4DJV2_HUMAN Citrate synthase OS=Homo sapiens GN=CS PE=1 SV=1;>tr|A0A024RB75|A0A024RB75_HUMAN Citrate synthase OS=Homo sapiens GN=CS PE=3 SV=1;>sp|O75390|CISY_HUMAN Citrate synthase, mitochondrial OS=Homo sapiens GN=CS PE=1 SV=2;>tr|B3KTN4|B3KTN	Citrate synthase;Citrate synthase, mitochondrial	50.431	453	0.77102	0.76813	5	0.61091	0.91883	5	11.9	12.8	5	6	1690200000	229340000	1610000000	157110000
HNRPH3;HNRNPH3	>tr|Q53F48|Q53F48_HUMAN Heterogeneous nuclear ribonucleoprotein H3 isoform a variant (Fragment) OS=Homo sapiens PE=2 SV=1;>tr|A0A024QZK8|A0A024QZK8_HUMAN Heterogeneous nuclear ribonucleoprotein H3 (2H9), isoform CRA_a OS=Homo sapiens GN=HNRPH3 PE=4 SV=1;>s	Heterogeneous nuclear ribonucleoprotein H3	36.925	346	0.76388	0.76657	10	0.55528	0.86625	11	30.1	31.5	7	8	690900000	768040000	578280000	966180000
HEL-S-87p;ALDOA	>tr|V9HWN7|V9HWN7_HUMAN Fructose-bisphosphate aldolase OS=Homo sapiens GN=HEL-S-87p PE=2 SV=1;>tr|J3KPS3|J3KPS3_HUMAN Fructose-bisphosphate aldolase OS=Homo sapiens GN=ALDOA PE=1 SV=1;>sp|P04075|ALDOA_HUMAN Fructose-bisphosphate aldolase A OS=Homo sapiens	Fructose-bisphosphate aldolase A	39.42	364	0.82202	0.7665	5	0.77706	1.2899	3	18.7	14.3	5	4	175340000	218030000	71956000	87344000
FAM98B	>sp|Q52LJ0|FA98B_HUMAN Protein FAM98B OS=Homo sapiens GN=FAM98B PE=1 SV=1;>sp|Q52LJ0-2|FA98B_HUMAN Isoform 2 of Protein FAM98B OS=Homo sapiens GN=FAM98B	Protein FAM98B	37.19	330	0.74712	0.76632	3	0.45657	0.71582	2	11.2	7	3	2	41379000	51249000	45381000	79265000
HNRNPUL1;HNRPUL1	>tr|A8K6U7|A8K6U7_HUMAN cDNA FLJ78252, highly similar to Homo sapiens heterogeneous nuclear ribonucleoprotein U-like 1 (HNRPUL1), transcript variant 1, mRNA OS=Homo sapiens PE=2 SV=1;>sp|Q9BUJ2-2|HNRL1_HUMAN Isoform 2 of Heterogeneous nuclear ribonucleopro	Heterogeneous nuclear ribonucleoprotein U-like protein 1	95.677	856	0.71558	0.76603	37	0.70452	1.1264	34	37.1	39.1	26	27	2581500000	3959800000	2873800000	3911600000
BRD4	>sp|O60885|BRD4_HUMAN Bromodomain-containing protein 4 OS=Homo sapiens GN=BRD4 PE=1 SV=2;>tr|A0A024R7H8|A0A024R7H8_HUMAN Bromodomain containing 4, isoform CRA_b OS=Homo sapiens GN=BRD4 PE=4 SV=1;>sp|O60885-2|BRD4_HUMAN Isoform C of Bromodomain-containing p	Bromodomain-containing protein 4	152.22	1362	0.75917	0.76596	42	0.74814	1.1883	44	22.4	24.5	25	24	3629100000	4508800000	3160400000	3894900000
PRPF4	>tr|Q6IAP9|Q6IAP9_HUMAN PRPF4 protein OS=Homo sapiens GN=PRPF4 PE=2 SV=1;>tr|Q5T1M7|Q5T1M7_HUMAN 60 kDa U4/U6 snRNP-specific spliceosomal protein OS=Homo sapiens GN=PRPF4 PE=2 SV=1;>tr|B2R7V4|B2R7V4_HUMAN cDNA, FLJ93619, highly similar to Homo sapiens PRP4	U4/U6 small nuclear ribonucleoprotein Prp4	58.306	521	0.81881	0.76499	3	0.92007	1.3924	2	7.5	5	3	2	59771000	75990000	22627000	32550000
TWISTNB	>sp|Q3B726|RPA43_HUMAN DNA-directed RNA polymerase I subunit RPA43 OS=Homo sapiens GN=TWISTNB PE=1 SV=1	DNA-directed RNA polymerase I subunit RPA43	37.432	338	0.69507	0.7645	7	0.71829	1.3569	5	21.3	21.3	7	6	197700000	279810000	213120000	277630000
RPL11	>tr|Q08ES8|Q08ES8_HUMAN Cell growth-inhibiting protein 34 OS=Homo sapiens PE=2 SV=1;>tr|Q5VVD0|Q5VVD0_HUMAN Ribosomal protein L11, isoform CRA_b OS=Homo sapiens GN=RPL11 PE=2 SV=1;>sp|P62913-2|RL11_HUMAN Isoform 2 of 60S ribosomal protein L11 OS=Homo sapie	60S ribosomal protein L11	20.094	177	0.84549	0.76384	3	0.59412	0.93463	4	16.9	26	3	5	81080000	135940000	92692000	248170000
PRPF19	>sp|Q9UMS4|PRP19_HUMAN Pre-mRNA-processing factor 19 OS=Homo sapiens GN=PRPF19 PE=1 SV=1;>tr|F5GY56|F5GY56_HUMAN Pre-mRNA-processing factor 19 (Fragment) OS=Homo sapiens GN=PRPF19 PE=1 SV=1	Pre-mRNA-processing factor 19	55.18	504	0.79181	0.76319	3	0.62062	1.0275	3	10.3	13.7	4	4	63033000	71611000	60074000	89939000
MTDH	>tr|A0A024R9D2|A0A024R9D2_HUMAN Metadherin, isoform CRA_a OS=Homo sapiens GN=MTDH PE=4 SV=1;>sp|Q86UE4|LYRIC_HUMAN Protein LYRIC OS=Homo sapiens GN=MTDH PE=1 SV=2;>tr|E5RJU9|E5RJU9_HUMAN Protein LYRIC OS=Homo sapiens GN=MTDH PE=1 SV=1	Protein LYRIC	63.836	582	0.78085	0.76154	8	0.77279	1.1839	8	17.7	18.9	8	9	242430000	314840000	256580000	312730000
NHP2L1	>tr|Q6FHM6|Q6FHM6_HUMAN NHP2 non-histone chromosome protein 2-like 1 (S. cerevisiae) OS=Homo sapiens GN=NHP2L1 PE=2 SV=1;>tr|B1AHD1|B1AHD1_HUMAN NHP2-like protein 1 OS=Homo sapiens GN=NHP2L1 PE=1 SV=1;>sp|P55769|NH2L1_HUMAN NHP2-like protein 1 OS=Homo sapi	NHP2-like protein 1;NHP2-like protein 1, N-terminally processed	14.173	128	0.78282	0.75946	4	0.68014	1.1502	4	30.5	31.2	4	4	63414000	85187000	104090000	108980000
HNRNPH1	>tr|G8JLB6|G8JLB6_HUMAN Heterogeneous nuclear ribonucleoprotein H OS=Homo sapiens GN=HNRNPH1 PE=1 SV=1;>sp|P31943|HNRH1_HUMAN Heterogeneous nuclear ribonucleoprotein H OS=Homo sapiens GN=HNRNPH1 PE=1 SV=4;>tr|E9PCY7|E9PCY7_HUMAN Heterogeneous nuclear ribon	Heterogeneous nuclear ribonucleoprotein H;Heterogeneous nuclear ribonucleoprotein H, N-terminally processed	51.229	472	0.72234	0.75764	18	0.78289	1.1894	21	35.2	39.4	6	7	1735200000	2414100000	1740000000	2141200000
HNRNPL	>tr|Q6NTA2|Q6NTA2_HUMAN HNRNPL protein (Fragment) OS=Homo sapiens GN=HNRNPL PE=2 SV=2;>sp|P14866|HNRPL_HUMAN Heterogeneous nuclear ribonucleoprotein L OS=Homo sapiens GN=HNRNPL PE=1 SV=2;>tr|B2R959|B2R959_HUMAN cDNA, FLJ94229, highly similar to Homo sapien	Heterogeneous nuclear ribonucleoprotein L	61.926	572	0.68517	0.75662	21	0.64991	1.1127	19	47.2	45.1	18	17	1403300000	2055600000	1520300000	2011200000
SRSF10;SRSF12	>tr|Q5JRI1|Q5JRI1_HUMAN Serine/arginine-rich-splicing factor 10 OS=Homo sapiens GN=SRSF10 PE=1 SV=1;>tr|Q53GD7|Q53GD7_HUMAN FUS interacting protein (Serine-arginine rich) 1 isoform 2 variant (Fragment) OS=Homo sapiens PE=2 SV=1;>sp|O75494-5|SRS10_HUMAN Iso	Serine/arginine-rich splicing factor 10;Serine/arginine-rich splicing factor 12	20.913	172	0.71019	0.75658	6	0.57306	0.90529	6	29.7	36	5	6	273950000	391940000	327850000	549790000
MAP1B;DKFZp686F1345	>tr|A0A024RAM4|A0A024RAM4_HUMAN Microtubule-associated protein 1B, isoform CRA_b OS=Homo sapiens GN=MAP1B PE=4 SV=1;>sp|P46821|MAP1B_HUMAN Microtubule-associated protein 1B OS=Homo sapiens GN=MAP1B PE=1 SV=2;>tr|A2BDK6|A2BDK6_HUMAN Microtubule-associated p	Microtubule-associated protein 1B;MAP1B heavy chain;MAP1 light chain LC1	270.62	2468	0.80688	0.75439	8	0.45979	0.72891	7	5.1	4.6	9	9	349710000	372380000	258040000	542360000
MATR3;DKFZp686K23100	>tr|A8MXP9|A8MXP9_HUMAN Matrin-3 OS=Homo sapiens GN=MATR3 PE=1 SV=1;>sp|P43243|MATR3_HUMAN Matrin-3 OS=Homo sapiens GN=MATR3 PE=1 SV=2;>tr|Q68D11|Q68D11_HUMAN Putative uncharacterized protein DKFZp686K23100 OS=Homo sapiens GN=DKFZp686K23100 PE=2 SV=1;>tr|D	Matrin-3	99.966	895	0.75562	0.75213	25	0.8068	1.1706	21	29.7	29.1	23	21	1249800000	1678000000	1101500000	1362200000
C2orf49	>tr|C9J4K0|C9J4K0_HUMAN Ashwin OS=Homo sapiens GN=C2orf49 PE=1 SV=1;>sp|Q9BVC5-2|ASHWN_HUMAN Isoform 2 of Ashwin OS=Homo sapiens GN=C2orf49;>sp|Q9BVC5|ASHWN_HUMAN Ashwin OS=Homo sapiens GN=C2orf49 PE=1 SV=1	Ashwin	21.356	190	0.79651	0.75147	2	0.5742	0.94127	3	15.8	20.5	3	3	63533000	67955000	59475000	99324000
TARDBP	>tr|A0A087WX29|A0A087WX29_HUMAN TAR DNA-binding protein 43 (Fragment) OS=Homo sapiens GN=TARDBP PE=1 SV=1;>tr|A0A024R4E2|A0A024R4E2_HUMAN TAR DNA binding protein, isoform CRA_b OS=Homo sapiens GN=TARDBP PE=4 SV=1;>sp|Q13148|TADBP_HUMAN TAR DNA-binding prot	TAR DNA-binding protein 43	26.743	243	0.74353	0.74968	3	0.64947	1.0347	5	25.9	35.8	4	6	218950000	255280000	162300000	229670000
ELAVL1	>sp|Q15717|ELAV1_HUMAN ELAV-like protein 1 OS=Homo sapiens GN=ELAVL1 PE=1 SV=2;>sp|Q15717-2|ELAV1_HUMAN Isoform 2 of ELAV-like protein 1 OS=Homo sapiens GN=ELAVL1	ELAV-like protein 1	36.091	326	0.76632	0.74937	5	0.68746	1.0933	5	17.2	12.6	5	4	140280000	186580000	71699000	104420000
SF4;SUGP1	>tr|A5PLN4|A5PLN4_HUMAN Splicing factor 4 OS=Homo sapiens GN=SF4 PE=2 SV=1;>sp|Q8IWZ8|SUGP1_HUMAN SURP and G-patch domain-containing protein 1 OS=Homo sapiens GN=SUGP1 PE=1 SV=2;>tr|A8K7S0|A8K7S0_HUMAN cDNA FLJ75478, highly similar to Homo sapiens splicing	SURP and G-patch domain-containing protein 1	72.529	645	0.80113	0.74934	10	0.76601	1.2156	8	26.2	20.3	12	11	505360000	564170000	493840000	569690000
CTTN;EMS1	>tr|Q53HG7|Q53HG7_HUMAN Cortactin isoform a variant (Fragment) OS=Homo sapiens PE=1 SV=1;>sp|Q14247|SRC8_HUMAN Src substrate cortactin OS=Homo sapiens GN=CTTN PE=1 SV=2;>tr|A0A024R5M3|A0A024R5M3_HUMAN Cortactin, isoform CRA_c OS=Homo sapiens GN=CTTN PE=4 S	Src substrate cortactin	61.557	550	0.76032	0.74861	23	1.1496	1.7827	21	40.2	39.3	22	21	975880000	1288800000	1258400000	1098800000
SNRPA	>tr|B2R802|B2R802_HUMAN cDNA, FLJ93681, highly similar to Homo sapiens small nuclear ribonucleoprotein polypeptide A (SNRPA), mRNA OS=Homo sapiens PE=2 SV=1;>sp|P09012|SNRPA_HUMAN U1 small nuclear ribonucleoprotein A OS=Homo sapiens GN=SNRPA PE=1 SV=3;>tr|	U1 small nuclear ribonucleoprotein A	31.307	282	0.81781	0.74824	3	0.67311	1.103	3	12.1	15.6	1	2	59153000	65503000	62878000	92110000
EIF4G2;AAG1	>tr|H0Y3P2|H0Y3P2_HUMAN Eukaryotic translation initiation factor 4 gamma 2 OS=Homo sapiens GN=EIF4G2 PE=1 SV=1;>tr|D3DQV9|D3DQV9_HUMAN Eukaryotic translation initiation factor 4 gamma 2 (Fragment) OS=Homo sapiens GN=EIF4G2 PE=1 SV=1;>tr|Q59G42|Q59G42_HUMAN	Eukaryotic translation initiation factor 4 gamma 2	98.117	869	0.83287	0.74811	3	1.3131	2.0801	3	3	3.1	3	3	21909000	27864000	29309000	18755000
KHDRBS1	>tr|B4DDX2|B4DDX2_HUMAN cDNA FLJ54590, highly similar to KH domain-containing, RNA-binding, signaltransduction-associated protein 1 OS=Homo sapiens PE=2 SV=1;>sp|Q07666-2|KHDR1_HUMAN Isoform 2 of KH domain-containing, RNA-binding, signal transduction-assoc	KH domain-containing, RNA-binding, signal transduction-associated protein 1	46.459	423	0.73294	0.74682	10	0.6122	0.93079	11	20.1	15.8	7	6	665340000	750300000	827270000	1188800000
SMARCA4	>tr|A7E2E1|A7E2E1_HUMAN SWI/SNF related, matrix associated, actin dependent regulator of chromatin, subfamily a, member 4 OS=Homo sapiens GN=SMARCA4 PE=2 SV=1;>tr|Q9HBD4|Q9HBD4_HUMAN SMARCA4 isoform 2 OS=Homo sapiens GN=SMARCA4 PE=4 SV=1;>tr|B9EGQ8|B9EGQ8_	Transcription activator BRG1	184.64	1647	0.73952	0.7466	5	0.70757	1.0989	5	3.6	3.2	5	5	49818000	63266000	30289000	40005000
SON	>sp|P18583-5|SON_HUMAN Isoform D of Protein SON OS=Homo sapiens GN=SON;>sp|P18583-6|SON_HUMAN Isoform E of Protein SON OS=Homo sapiens GN=SON;>sp|P18583-10|SON_HUMAN Isoform J of Protein SON OS=Homo sapiens GN=SON;>sp|P18583-3|SON_HUMAN Isoform B of Protei	Protein SON	267.03	2459	0.7558	0.7455	28	1.0015	1.6007	26	13.7	12.9	24	22	1361100000	1906600000	1299900000	1292300000
MECP2	>tr|E9LUH3|E9LUH3_HUMAN Mutant methyl CpG binding protein 2 OS=Homo sapiens GN=MECP2 PE=2 SV=1;>tr|D9ZNA4|D9ZNA4_HUMAN Mutant methyl CpG binding protein 2 transcript 1 OS=Homo sapiens GN=MECP2 PE=2 SV=1;>tr|D3YJ43|D3YJ43_HUMAN Methyl CpG binding protein 2	Methyl-CpG-binding protein 2	52.414	486	0.73753	0.74524	11	0.6025	1.0745	9	28.8	20.2	12	8	282160000	383910000	175000000	243120000
ARID2	>sp|Q68CP9-3|ARID2_HUMAN Isoform 2 of AT-rich interactive domain-containing protein 2 OS=Homo sapiens GN=ARID2;>sp|Q68CP9|ARID2_HUMAN AT-rich interactive domain-containing protein 2 OS=Homo sapiens GN=ARID2 PE=1 SV=2;>tr|F8W108|F8W108_HUMAN AT-rich interac	AT-rich interactive domain-containing protein 2	191.42	1783	0.76502	0.7452	11	0.92223	1.4583	8	6.4	4.8	11	8	205610000	245750000	184320000	202540000
PDE6H;MYL6	>tr|F8W1R7|F8W1R7_HUMAN Myosin light polypeptide 6 OS=Homo sapiens GN=MYL6 PE=1 SV=1;>tr|J3KND3|J3KND3_HUMAN Myosin light polypeptide 6 OS=Homo sapiens GN=MYL6 PE=1 SV=1;>tr|G8JLA2|G8JLA2_HUMAN Myosin light polypeptide 6 OS=Homo sapiens GN=MYL6 PE=1 SV=1;>	Myosin light polypeptide 6	16.29	145	0.80285	0.74484	3	0.63492	0.98439	2	22.8	15.2	3	2	38010000	51656000	55745000	80080000
NOLA1;GAR1	>tr|A0A024RDJ3|A0A024RDJ3_HUMAN Nucleolar protein family A, member 1 (H/ACA small nucleolar RNPs), isoform CRA_a OS=Homo sapiens GN=NOLA1 PE=4 SV=1;>sp|Q9NY12-2|GAR1_HUMAN Isoform 2 of H/ACA ribonucleoprotein complex subunit 1 OS=Homo sapiens GN=GAR1;>sp|Q	H/ACA ribonucleoprotein complex subunit 1	22.348	217	0.80022	0.7448	3	NA	NA	0	15.7	0	3	0	74364000	93896000	0	0
CIZ1	>tr|H0Y5D5|H0Y5D5_HUMAN Cip1-interacting zinc finger protein (Fragment) OS=Homo sapiens GN=CIZ1 PE=1 SV=1;>tr|A0A024R885|A0A024R885_HUMAN CDKN1A interacting zinc finger protein 1, isoform CRA_b OS=Homo sapiens GN=CIZ1 PE=4 SV=1;>tr|B7Z3U7|B7Z3U7_HUMAN cDNA	Cip1-interacting zinc finger protein	91.124	820	0.79578	0.74277	10	0.58596	0.92554	10	18.5	22.4	12	13	284320000	381310000	1869800000	455250000
H2AFY	>sp|O75367-2|H2AY_HUMAN Isoform 1 of Core histone macro-H2A.1 OS=Homo sapiens GN=H2AFY;>sp|O75367-3|H2AY_HUMAN Isoform 3 of Core histone macro-H2A.1 OS=Homo sapiens GN=H2AFY;>sp|O75367|H2AY_HUMAN Core histone macro-H2A.1 OS=Homo sapiens GN=H2AFY PE=1 SV=4;	Core histone macro-H2A.1;Histone H2A	39.183	369	0.77094	0.74187	4	0.62915	0.99786	3	15.4	12.5	4	3	129960000	184310000	45461000	66698000
KHSRP	>sp|Q92945|FUBP2_HUMAN Far upstream element-binding protein 2 OS=Homo sapiens GN=KHSRP PE=1 SV=4;>tr|A0A087WTP3|A0A087WTP3_HUMAN Far upstream element-binding protein 2 OS=Homo sapiens GN=KHSRP PE=1 SV=1;>tr|B4DV73|B4DV73_HUMAN cDNA FLJ51330, highly similar	Far upstream element-binding protein 2	73.114	711	0.71116	0.74055	70	0.76108	1.2475	59	54.6	49.1	35	29	13514000000	18431000000	11690000000	14046000000
HELLS	>tr|Q9NW36|Q9NW36_HUMAN Lymphoid-specific helicase OS=Homo sapiens GN=HELLS PE=1 SV=1;>tr|A0A087WSW7|A0A087WSW7_HUMAN Helicase, lymphoid-specific, isoform CRA_d OS=Homo sapiens GN=HELLS PE=1 SV=1;>tr|F6XU50|F6XU50_HUMAN Helicase, lymphoid-specific, isoform	Lymphoid-specific helicase	35.131	310	0.81423	0.73858	2	NA	NA	1	7.7	3.2	2	1	30089000	35588000	31136000	22989000
FUS	>tr|A8K4H1|A8K4H1_HUMAN cDNA FLJ78268, highly similar to Homo sapiens fusion (involved in t(12;16) in malignant liposarcoma), transcript variant 1, mRNA OS=Homo sapiens PE=2 SV=1;>tr|Q8TBR3|Q8TBR3_HUMAN Fusion (Involved in t(1216) in malignant liposarcoma)	RNA-binding protein FUS	53.41	525	0.66156	0.73629	14	0.58524	0.95449	15	19	23	8	10	3447900000	4550300000	3204200000	4753900000
DDX3X;DDX3Y	>tr|B5BTY4|B5BTY4_HUMAN ATP-dependent RNA helicase DDX3X OS=Homo sapiens GN=DDX3X PE=2 SV=1;>tr|Q59GX6|Q59GX6_HUMAN DEAD/H (Asp-Glu-Ala-Asp/His) box polypeptide 3 variant (Fragment) OS=Homo sapiens PE=2 SV=1;>sp|O00571-2|DDX3X_HUMAN Isoform 2 of ATP-depend	ATP-dependent RNA helicase DDX3X;ATP-dependent RNA helicase DDX3Y	73.171	662	0.7632	0.73431	15	0.84695	1.3822	16	35.3	29.6	20	16	744070000	920890000	703270000	731370000
CLTC	>tr|A0A087WVQ6|A0A087WVQ6_HUMAN Clathrin heavy chain OS=Homo sapiens GN=CLTC PE=1 SV=1;>sp|Q00610-2|CLH1_HUMAN Isoform 2 of Clathrin heavy chain 1 OS=Homo sapiens GN=CLTC;>sp|Q00610|CLH1_HUMAN Clathrin heavy chain 1 OS=Homo sapiens GN=CLTC PE=1 SV=5;>tr|J3	Clathrin heavy chain 1	192.06	1679	0.7234	0.73157	5	0.5754	0.91915	4	3.5	3	5	4	70947000	89273000	40541000	68982000
G3BP;DKFZp686L1159;G3BP1	>tr|Q6FI03|Q6FI03_HUMAN G3BP protein OS=Homo sapiens GN=G3BP PE=2 SV=1;>tr|Q5U0Q1|Q5U0Q1_HUMAN Putative uncharacterized protein DKFZp686L1159 OS=Homo sapiens GN=DKFZp686L1159 PE=2 SV=1;>tr|Q53HH4|Q53HH4_HUMAN Ras-GTPase-activating protein SH3-domain-bindin	Ras GTPase-activating protein-binding protein 1	52.164	466	0.76397	0.73052	2	NA	NA	1	5.6	3.2	2	1	15306000	24479000	20585000	13968000
MANF	>tr|A8K878|A8K878_HUMAN cDNA FLJ77177, highly similar to Homo sapiens arginine-rich, mutated in early stage tumors (ARMET), mRNA OS=Homo sapiens PE=2 SV=1;>sp|P55145|MANF_HUMAN Mesencephalic astrocyte-derived neurotrophic factor OS=Homo sapiens GN=MANF PE=	Mesencephalic astrocyte-derived neurotrophic factor	21.143	185	0.78535	0.72879	3	0.6305	1.0657	4	27	28.1	4	4	67069000	85328000	75888000	107640000
SFRS11;SRSF11	>tr|Q05BU6|Q05BU6_HUMAN SFRS11 protein (Fragment) OS=Homo sapiens GN=SFRS11 PE=2 SV=1;>tr|Q6PJY9|Q6PJY9_HUMAN SFRS11 protein (Fragment) OS=Homo sapiens GN=SFRS11 PE=2 SV=1;>tr|Q6PKC9|Q6PKC9_HUMAN SFRS11 protein (Fragment) OS=Homo sapiens GN=SFRS11 PE=2 SV=	Serine/arginine-rich splicing factor 11	24.847	246	0.78474	0.7229	3	0.66374	1.0582	4	15.9	24.4	3	4	97449000	117150000	114340000	164060000
TNRC15;GIGYF2	>tr|A0A024R4A5|A0A024R4A5_HUMAN Trinucleotide repeat containing 15, isoform CRA_a OS=Homo sapiens GN=TNRC15 PE=4 SV=1;>tr|I1E4Y6|I1E4Y6_HUMAN PERQ amino acid-rich with GYF domain-containing protein 2 OS=Homo sapiens GN=GIGYF2 PE=1 SV=1;>sp|Q6Y7W6-4|PERQ2_H	PERQ amino acid-rich with GYF domain-containing protein 2	149.94	1298	0.79221	0.72242	3	NA	NA	1	2.4	0.9	3	1	10508000	14764000	9003400	5008900
U2AF2	>tr|K7ENG2|K7ENG2_HUMAN Splicing factor U2AF 65 kDa subunit OS=Homo sapiens GN=U2AF2 PE=1 SV=1;>tr|B5BU25|B5BU25_HUMAN U2 small nuclear RNA auxiliary factor 2 isoform b OS=Homo sapiens GN=U2AF2 PE=2 SV=1;>sp|P26368-2|U2AF2_HUMAN Isoform 2 of Splicing facto	Splicing factor U2AF 65 kDa subunit	33.901	307	0.7381	0.7223	8	0.67217	1.0407	5	33.6	24.1	8	6	309680000	389180000	182390000	288450000
PCM1	>tr|E7ETA6|E7ETA6_HUMAN Pericentriolar material 1 protein OS=Homo sapiens GN=PCM1 PE=1 SV=1;>tr|B9EIS5|B9EIS5_HUMAN PCM1 protein OS=Homo sapiens GN=PCM1 PE=2 SV=1;>tr|D3DSQ0|D3DSQ0_HUMAN Pericentriolar material 1, isoform CRA_a OS=Homo sapiens GN=PCM1 PE=4	Pericentriolar material 1 protein	227.73	2016	0.70652	0.71768	3	2.1527	3.7718	5	1.8	3.1	3	6	15718000	17647000	119780000	71940000
PQBP1	>sp|O60828-5|PQBP1_HUMAN Isoform 5 of Polyglutamine-binding protein 1 OS=Homo sapiens GN=PQBP1;>sp|O60828-4|PQBP1_HUMAN Isoform 4 of Polyglutamine-binding protein 1 OS=Homo sapiens GN=PQBP1;>sp|O60828-2|PQBP1_HUMAN Isoform 2 of Polyglutamine-binding protei	Polyglutamine-binding protein 1	18.706	165	0.70566	0.71378	3	0.52061	0.84189	5	26.1	37	4	5	125630000	171210000	123290000	242530000
POLR2I	>sp|P36954|RPB9_HUMAN DNA-directed RNA polymerase II subunit RPB9 OS=Homo sapiens GN=POLR2I PE=1 SV=1;>tr|K7EKS1|K7EKS1_HUMAN DNA-directed RNA polymerase II subunit RPB9 OS=Homo sapiens GN=POLR2I PE=1 SV=1	DNA-directed RNA polymerase II subunit RPB9	14.523	125	0.70319	0.71332	3	0.59486	0.93656	2	24	33.6	3	3	159310000	203820000	100040000	174790000
SF3B3	>tr|A8K6V3|A8K6V3_HUMAN cDNA FLJ78677, highly similar to Homo sapiens splicing factor 3b, subunit 3, 130kDa (SF3B3), mRNA OS=Homo sapiens PE=2 SV=1;>sp|Q15393|SF3B3_HUMAN Splicing factor 3B subunit 3 OS=Homo sapiens GN=SF3B3 PE=1 SV=4;>tr|B3KQH1|B3KQH1_HUM	Splicing factor 3B subunit 3	135.58	1217	0.79523	0.71207	5	0.63145	1.0206	6	6.3	6.3	6	7	159820000	197550000	123510000	194820000
FKBP3	>tr|Q53GD8|Q53GD8_HUMAN Peptidyl-prolyl cis-trans isomerase (Fragment) OS=Homo sapiens PE=2 SV=1;>sp|Q00688|FKBP3_HUMAN Peptidyl-prolyl cis-trans isomerase FKBP3 OS=Homo sapiens GN=FKBP3 PE=1 SV=1	Peptidyl-prolyl cis-trans isomerase;Peptidyl-prolyl cis-trans isomerase FKBP3	25.204	224	0.78596	0.71162	3	0.96653	1.5194	5	25.4	31.2	5	7	160190000	230060000	345870000	333080000
PHIP	>sp|Q8WWQ0|PHIP_HUMAN PH-interacting protein OS=Homo sapiens GN=PHIP PE=1 SV=2;>tr|Q9NWP3|Q9NWP3_HUMAN cDNA FLJ20705 fis, clone KAIA1571 OS=Homo sapiens PE=2 SV=1	PH-interacting protein	206.69	1821	0.80621	0.71155	5	0.85141	1.3597	5	2.9	3	4	4	110000000	146970000	91293000	95097000
DAZAP1;DAZAP1/MEF2D fusion	>tr|K7EQ55|K7EQ55_HUMAN DAZ-associated protein 1 OS=Homo sapiens GN=DAZAP1 PE=1 SV=2;>tr|K7EK33|K7EK33_HUMAN DAZ-associated protein 1 OS=Homo sapiens GN=DAZAP1 PE=1 SV=2;>sp|Q96EP5-2|DAZP1_HUMAN Isoform 2 of DAZ-associated protein 1 OS=Homo sapiens GN=DAZA	DAZ-associated protein 1	43.312	406	0.66562	0.71012	10	0.61457	0.93459	11	33.5	26.8	9	8	1326200000	1829500000	1160900000	1793100000
APEX1	>tr|Q5TZP7|Q5TZP7_HUMAN APEX nuclease (Multifunctional DNA repair enzyme) 1 OS=Homo sapiens GN=APEX1 PE=2 SV=1;>sp|P27695|APEX1_HUMAN DNA-(apurinic or apyrimidinic site) lyase OS=Homo sapiens GN=APEX1 PE=1 SV=2;>tr|G3V3M6|G3V3M6_HUMAN DNA-(apurinic or apyr	DNA-(apurinic or apyrimidinic site) lyase;DNA-(apurinic or apyrimidinic site) lyase, mitochondrial	35.554	318	0.69664	0.70974	3	0.84653	1.391	4	21.1	21.7	5	5	106660000	133020000	77281000	100870000
CD63;SS18;SYT-SSX2;SYT-SSX1;SYT	>tr|F5GWN1|F5GWN1_HUMAN Protein SSXT OS=Homo sapiens GN=SS18 PE=1 SV=2;>tr|J3KRP6|J3KRP6_HUMAN Protein SSXT OS=Homo sapiens GN=SS18 PE=1 SV=1;>tr|J3QS72|J3QS72_HUMAN Protein SSXT OS=Homo sapiens GN=SS18 PE=1 SV=1;>tr|X6R3J2|X6R3J2_HUMAN Protein SSXT OS=Hom	Protein SSXT	4.3871	41	0.68295	0.70472	2	0.69411	1.195	2	48.8	48.8	2	2	53352000	73648000	45412000	66034000
VRK1	>tr|A8K245|A8K245_HUMAN cDNA FLJ75441, highly similar to Homo sapiens vaccinia related kinase 1 (VRK1), mRNA OS=Homo sapiens PE=2 SV=1;>sp|Q99986|VRK1_HUMAN Serine/threonine-protein kinase VRK1 OS=Homo sapiens GN=VRK1 PE=1 SV=1;>tr|H0YJ50|H0YJ50_HUMAN Seri	Serine/threonine-protein kinase VRK1	45.445	396	0.74223	0.70212	10	0.96123	1.5419	11	24.5	25	9	9	254930000	321110000	359320000	332760000
TRIP12	>tr|C9JLD7|C9JLD7_HUMAN E3 ubiquitin-protein ligase TRIP12 (Fragment) OS=Homo sapiens GN=TRIP12 PE=1 SV=1;>tr|B4DYJ6|B4DYJ6_HUMAN cDNA FLJ52804, highly similar to Thyroid receptor-interacting protein 12 OS=Homo sapiens PE=2 SV=1;>tr|G5E9G6|G5E9G6_HUMAN E3	E3 ubiquitin-protein ligase TRIP12	20.511	190	0.7153	0.70206	4	0.5078	0.90807	5	27.4	27.4	4	4	57563000	80747000	55904000	86987000
TXNL4A	>sp|P83876|TXN4A_HUMAN Thioredoxin-like protein 4A OS=Homo sapiens GN=TXNL4A PE=1 SV=1;>tr|K7ESL1|K7ESL1_HUMAN Thioredoxin-like protein 4A OS=Homo sapiens GN=TXNL4A PE=1 SV=1	Thioredoxin-like protein 4A	16.786	142	0.75212	0.70134	5	0.77877	1.2174	8	29.6	43.7	4	6	246990000	286390000	243110000	295320000
NUP153	>tr|A0A024QZW7|A0A024QZW7_HUMAN Nucleoporin 153kDa, isoform CRA_a OS=Homo sapiens GN=NUP153 PE=4 SV=1;>sp|P49790|NU153_HUMAN Nuclear pore complex protein Nup153 OS=Homo sapiens GN=NUP153 PE=1 SV=2;>sp|P49790-3|NU153_HUMAN Isoform 3 of Nuclear pore complex	Nuclear pore complex protein Nup153	153.97	1475	0.73937	0.70104	30	0.9293	1.5925	37	24.4	28.1	25	31	1329300000	1772900000	1242400000	1303300000
ARID1A;ARID1A variant protein	>sp|O14497|ARI1A_HUMAN AT-rich interactive domain-containing protein 1A OS=Homo sapiens GN=ARID1A PE=1 SV=3;>sp|O14497-3|ARI1A_HUMAN Isoform 3 of AT-rich interactive domain-containing protein 1A OS=Homo sapiens GN=ARID1A;>sp|O14497-2|ARI1A_HUMAN Isoform 2	AT-rich interactive domain-containing protein 1A	242.04	2285	0.77492	0.69503	19	0.83474	1.3764	24	10.9	13.6	20	24	500740000	617610000	558880000	591610000
PRRC2A	>sp|P48634|PRC2A_HUMAN Protein PRRC2A OS=Homo sapiens GN=PRRC2A PE=1 SV=3;>sp|P48634-3|PRC2A_HUMAN Isoform 3 of Protein PRRC2A OS=Homo sapiens GN=PRRC2A;>sp|P48634-2|PRC2A_HUMAN Isoform 2 of Protein PRRC2A OS=Homo sapiens GN=PRRC2A;>sp|P48634-4|PRC2A_HUMAN	Protein PRRC2A	228.86	2157	0.67683	0.69444	6	0.45748	0.76464	6	4.4	6.6	6	8	204250000	229440000	193670000	273690000
ILF3	>sp|Q12906-7|ILF3_HUMAN Isoform 7 of Interleukin enhancer-binding factor 3 OS=Homo sapiens GN=ILF3;>tr|A0A024R7C7|A0A024R7C7_HUMAN Interleukin enhancer binding factor 3, 90kDa, isoform CRA_d OS=Homo sapiens GN=ILF3 PE=4 SV=1;>tr|F4ZW66|F4ZW66_HUMAN NF110b	Interleukin enhancer-binding factor 3	95.807	898	0.65833	0.69244	52	0.74489	1.1385	57	55.2	54.8	37	34	12806000000	18255000000	11364000000	14462000000
YBX1;CSDA;YBX3;YBX2	>tr|Q6PKI6|Q6PKI6_HUMAN YBX1 protein (Fragment) OS=Homo sapiens GN=YBX1 PE=2 SV=1;>tr|Q05D43|Q05D43_HUMAN YBX1 protein (Fragment) OS=Homo sapiens GN=YBX1 PE=2 SV=1;>tr|A0A087X1S2|A0A087X1S2_HUMAN Nuclease-sensitive element-binding protein 1 OS=Homo sapiens	Nuclease-sensitive element-binding protein 1;Y-box-binding protein 3;Y-box-binding protein 2	29.374	266	0.76103	0.69152	3	0.68032	1.0859	2	19.2	13.5	3	2	58897000	72541000	30032000	58552000
EML4/ALK fusion;EML4;EML4-ALK variant 6;EML4-ALK variant 7;EML4-ALK	>tr|B3XZL9|B3XZL9_HUMAN Tyrosine-protein kinase receptor OS=Homo sapiens PE=2 SV=1;>tr|B3XZM0|B3XZM0_HUMAN Tyrosine-protein kinase receptor OS=Homo sapiens PE=2 SV=1;>tr|A9YLN7|A9YLN7_HUMAN Tyrosine-protein kinase receptor OS=Homo sapiens GN=EML4/ALK fusio	Tyrosine-protein kinase receptor;Echinoderm microtubule-associated protein-like 4	86.4	785	0.64235	0.68996	2	0.46739	0.69707	2	4.1	4.1	2	2	23297000	39505000	34088000	77360000
MEN;ELL	>tr|Q59HG4|Q59HG4_HUMAN Elongation factor RNA polymerase II variant (Fragment) OS=Homo sapiens PE=2 SV=1;>tr|V9H027|V9H027_HUMAN MEN protein (Fragment) OS=Homo sapiens GN=MEN PE=2 SV=1;>tr|A8KAP0|A8KAP0_HUMAN cDNA FLJ75279, highly similar to Homo sapiens e	RNA polymerase II elongation factor ELL	62.123	565	0.66629	0.6873	4	1.1153	1.7693	3	7.4	10.8	4	5	90479000	122720000	86208000	92724000
TAF3	>sp|Q5VWG9|TAF3_HUMAN Transcription initiation factor TFIID subunit 3 OS=Homo sapiens GN=TAF3 PE=1 SV=1	Transcription initiation factor TFIID subunit 3	103.58	929	0.6758	0.68724	4	0.3767	0.58592	3	4.4	8.2	3	6	76065000	92419000	55919000	149190000
PC	>tr|A0A024R5C5|A0A024R5C5_HUMAN Pyruvate carboxylase OS=Homo sapiens GN=PC PE=4 SV=1;>sp|P11498|PYC_HUMAN Pyruvate carboxylase, mitochondrial OS=Homo sapiens GN=PC PE=1 SV=2;>tr|E9PS68|E9PS68_HUMAN Pyruvate carboxylase, mitochondrial OS=Homo sapiens GN=PC	Pyruvate carboxylase;Pyruvate carboxylase, mitochondrial	129.63	1178	0.67276	0.67481	5	0.49799	0.79093	5	7.6	7.9	7	6	75116000	101740000	77188000	140470000
EIF4B	>tr|Q7Z5Y0|Q7Z5Y0_HUMAN EIF4B protein (Fragment) OS=Homo sapiens GN=EIF4B PE=2 SV=1;>tr|B4DS01|B4DS01_HUMAN cDNA FLJ59402, highly similar to Eukaryotic translation initiation factor 4B OS=Homo sapiens PE=2 SV=1;>tr|B4DEP6|B4DEP6_HUMAN cDNA FLJ59206, highly	Eukaryotic translation initiation factor 4B	39.217	349	0.72686	0.67366	2	NA	NA	0	9.5	3.7	2	1	8412900	10371000	0	0
LMNA	>sp|P02545-3|LMNA_HUMAN Isoform ADelta10 of Prelamin-A/C OS=Homo sapiens GN=LMNA;>sp|P02545|LMNA_HUMAN Prelamin-A/C OS=Homo sapiens GN=LMNA PE=1 SV=1;>tr|Q8N519|Q8N519_HUMAN LMNA protein OS=Homo sapiens PE=2 SV=1;>tr|Q5I6Y5|Q5I6Y5_HUMAN Lamin A/C transcrip	Prelamin-A/C;Lamin-A/C	70.66	634	0.66393	0.67304	2	0.86846	1.3225	3	4.3	6.2	2	3	26576000	41940000	21234000	29256000
HMGB1;HMGB1P1	>tr|Q5T7C4|Q5T7C4_HUMAN High mobility group protein B1 OS=Homo sapiens GN=HMGB1 PE=1 SV=1;>tr|Q5T7C6|Q5T7C6_HUMAN High mobility group protein B1 (Fragment) OS=Homo sapiens GN=HMGB1 PE=1 SV=1;>tr|B7Z965|B7Z965_HUMAN cDNA FLJ56337, highly similar to High mob	High mobility group protein B1;Putative high mobility group protein B1-like 1	18.311	158	0.61906	0.66676	5	0.53344	0.92145	8	36.7	48.1	4	5	152520000	191340000	257590000	472670000
LEMD3	>tr|A0A024RBB9|A0A024RBB9_HUMAN LEM domain containing 3, isoform CRA_a OS=Homo sapiens GN=LEMD3 PE=4 SV=1;>sp|Q9Y2U8|MAN1_HUMAN Inner nuclear membrane protein Man1 OS=Homo sapiens GN=LEMD3 PE=1 SV=2	Inner nuclear membrane protein Man1	99.996	911	0.69131	0.6663	9	0.82022	1.2684	10	17.3	13.8	12	10	204140000	278780000	166760000	190390000
SRSF2;SFRS2	>tr|J3QL05|J3QL05_HUMAN Serine/arginine-rich-splicing factor 2 (Fragment) OS=Homo sapiens GN=SRSF2 PE=1 SV=1;>tr|J3KP15|J3KP15_HUMAN Serine/arginine-rich-splicing factor 2 (Fragment) OS=Homo sapiens GN=SRSF2 PE=1 SV=3;>tr|Q53FN0|Q53FN0_HUMAN Splicing facto	Serine/arginine-rich splicing factor 2	15.156	130	0.63046	0.66601	4	0.42712	0.71718	3	26.2	26.2	3	3	157130000	57985000	26122000	43501000
KIF18B	>sp|Q86Y91-2|KI18B_HUMAN Isoform 2 of Kinesin-like protein KIF18B OS=Homo sapiens GN=KIF18B;>sp|Q86Y91-3|KI18B_HUMAN Isoform 3 of Kinesin-like protein KIF18B OS=Homo sapiens GN=KIF18B;>sp|Q86Y91|KI18B_HUMAN Kinesin-like protein KIF18B OS=Homo sapiens GN=KI	Kinesin-like protein KIF18B	91.964	842	0.74022	0.66521	3	0.56058	0.8845	3	7.4	6.4	5	4	42225000	84084000	129280000	77681000
NME2;NME1-NME2;NME2P1	>tr|Q6FHN3|Q6FHN3_HUMAN Nucleoside diphosphate kinase OS=Homo sapiens GN=NME2 PE=2 SV=1;>tr|Q32Q12|Q32Q12_HUMAN Nucleoside diphosphate kinase OS=Homo sapiens GN=NME1-NME2 PE=1 SV=1;>sp|P22392|NDKB_HUMAN Nucleoside diphosphate kinase B OS=Homo sapiens GN=NM	Nucleoside diphosphate kinase;Nucleoside diphosphate kinase B;Putative nucleoside diphosphate kinase	17.298	152	0.6091	0.65539	3	0.43862	0.72524	3	27.6	32.2	3	4	38730000	54254000	24191000	54577000
SNRP116;U5-116KD;EFTUD2	>tr|B3KWY2|B3KWY2_HUMAN cDNA FLJ44205 fis, clone THYMU3001379, highly similar to 116 kDa U5 small nuclear ribonucleoprotein component OS=Homo sapiens PE=2 SV=1;>tr|Q8IXJ3|Q8IXJ3_HUMAN Small nuclear ribonucleoprotein component OS=Homo sapiens GN=SNRP116 PE=	116 kDa U5 small nuclear ribonucleoprotein component	61.051	550	0.7195	0.65443	3	NA	NA	1	8.2	2.2	4	1	40100000	50696000	7484000	10139000
DNMT1	>tr|Q59FP7|Q59FP7_HUMAN DNA (Cytosine-5-)-methyltransferase 1 variant (Fragment) OS=Homo sapiens PE=2 SV=1;>tr|A0A024R7E3|A0A024R7E3_HUMAN DNA (Cytosine-5-)-methyltransferase 1, isoform CRA_a OS=Homo sapiens GN=DNMT1 PE=4 SV=1;>sp|P26358|DNMT1_HUMAN DNA (c	Cytosine-specific methyltransferase;DNA (cytosine-5)-methyltransferase 1	182.02	1606	0.64556	0.65228	3	NA	NA	1	2	0.6	3	1	32419000	57949000	8411800	9570800
HRB;AGFG1	>tr|B4DHC5|B4DHC5_HUMAN cDNA FLJ57927, highly similar to Nucleoporin-like protein RIP OS=Homo sapiens PE=2 SV=1;>tr|A0A024R458|A0A024R458_HUMAN HIV-1 Rev binding protein, isoform CRA_a OS=Homo sapiens GN=HRB PE=4 SV=1;>sp|P52594-2|AGFG1_HUMAN Isoform 2 of	Arf-GAP domain and FG repeat-containing protein 1	46.506	453	0.62801	0.63872	2	0.4929	0.78792	3	4.6	17	2	5	25718000	43347000	89831000	181920000
HDLBP	>tr|A0A024R4E5|A0A024R4E5_HUMAN High density lipoprotein binding protein (Vigilin), isoform CRA_a OS=Homo sapiens GN=HDLBP PE=4 SV=1;>sp|Q00341|VIGLN_HUMAN Vigilin OS=Homo sapiens GN=HDLBP PE=1 SV=2;>tr|Q6ZS03|Q6ZS03_HUMAN cDNA FLJ45936 fis, clone PLACE700	Vigilin	141.44	1268	0.61892	0.6381	3	NA	NA	1	2.8	1.6	3	2	33123000	51099000	12855000	10030000
RSL1D1	>sp|O76021-2|RL1D1_HUMAN Isoform 2 of Ribosomal L1 domain-containing protein 1 OS=Homo sapiens GN=RSL1D1;>sp|O76021|RL1D1_HUMAN Ribosomal L1 domain-containing protein 1 OS=Homo sapiens GN=RSL1D1 PE=1 SV=3;>tr|J3QSV6|J3QSV6_HUMAN Ribosomal L1 domain-contain	Ribosomal L1 domain-containing protein 1	30.354	270	0.68145	0.63549	3	0.48228	0.77125	3	6.7	6.3	3	3	51934000	66916000	63828000	104610000
HMGN2	>sp|P05204|HMGN2_HUMAN Non-histone chromosomal protein HMG-17 OS=Homo sapiens GN=HMGN2 PE=1 SV=3	Non-histone chromosomal protein HMG-17	9.3926	90	0.51528	0.63302	19	0.2879	0.68522	11	63.3	55.6	6	2	6645000000	10529000000	4812600000	13492000000
YLPM1;FLJ00353	>sp|P49750-4|YLPM1_HUMAN Isoform 4 of YLP motif-containing protein 1 OS=Homo sapiens GN=YLPM1;>sp|P49750|YLPM1_HUMAN YLP motif-containing protein 1 OS=Homo sapiens GN=YLPM1 PE=1 SV=3;>tr|Q8NF45|Q8NF45_HUMAN FLJ00353 protein (Fragment) OS=Homo sapiens GN=FL	YLP motif-containing protein 1	241.64	2146	0.60156	0.63085	57	1.0462	1.7504	55	28.1	24.7	51	45	2455100000	3765200000	2371400000	2189100000
CYCS	>tr|C9JFR7|C9JFR7_HUMAN Cytochrome c (Fragment) OS=Homo sapiens GN=CYCS PE=1 SV=1;>tr|G4XXL9|G4XXL9_HUMAN Cytochrome c OS=Homo sapiens GN=CYCS PE=3 SV=1;>sp|P99999|CYC_HUMAN Cytochrome c OS=Homo sapiens GN=CYCS PE=1 SV=2;>tr|Q6LER6|Q6LER6_HUMAN Cytochrome	Cytochrome c	11.333	101	0.66554	0.63017	2	0.8282	1.2999	3	17.8	25.7	2	3	18988000	26987000	42076000	63436000
SPATA22;EPS15L1	>tr|M0R2S2|M0R2S2_HUMAN Epidermal growth factor receptor substrate 15-like 1 OS=Homo sapiens GN=EPS15L1 PE=1 SV=1;>tr|A5PKY0|A5PKY0_HUMAN EPS15L1 protein (Fragment) OS=Homo sapiens GN=EPS15L1 PE=2 SV=1;>tr|B4DQX5|B4DQX5_HUMAN cDNA FLJ56132, highly similar	Epidermal growth factor receptor substrate 15-like 1	49.856	447	0.62115	0.6295	3	NA	NA	0	5.8	0	3	0	21032000	30171000	0	0
ARID1B	>sp|Q8NFD5|ARI1B_HUMAN AT-rich interactive domain-containing protein 1B OS=Homo sapiens GN=ARID1B PE=1 SV=2;>sp|Q8NFD5-2|ARI1B_HUMAN Isoform 2 of AT-rich interactive domain-containing protein 1B OS=Homo sapiens GN=ARID1B;>sp|Q8NFD5-3|ARI1B_HUMAN Isoform 3	AT-rich interactive domain-containing protein 1B	236.12	2236	0.69834	0.62518	4	0.8095	1.2864	9	4.3	6	6	10	78025000	140240000	149600000	178110000
CCT8	>tr|Q7Z759|Q7Z759_HUMAN CCT8 protein OS=Homo sapiens GN=CCT8 PE=2 SV=1;>tr|Q53HU0|Q53HU0_HUMAN Chaperonin containing TCP1, subunit 8 (Theta) variant (Fragment) OS=Homo sapiens PE=2 SV=1;>sp|P50990-2|TCPQ_HUMAN Isoform 2 of T-complex protein 1 subunit theta	T-complex protein 1 subunit theta	54.106	497	0.65514	0.62487	2	NA	NA	1	4	2	2	1	10937000	12984000	4532400	6091200
SERBP1;DKFZp686P17171	>sp|Q8NC51|PAIRB_HUMAN Plasminogen activator inhibitor 1 RNA-binding protein OS=Homo sapiens GN=SERBP1 PE=1 SV=2;>sp|Q8NC51-3|PAIRB_HUMAN Isoform 3 of Plasminogen activator inhibitor 1 RNA-binding protein OS=Homo sapiens GN=SERBP1;>sp|Q8NC51-2|PAIRB_HUMAN	Plasminogen activator inhibitor 1 RNA-binding protein	44.965	408	0.6405	0.62418	21	1.0659	1.7273	24	42.9	42.2	14	15	1251800000	1801200000	1783600000	1568000000
LARP1	>sp|Q6PKG0-3|LARP1_HUMAN Isoform 2 of La-related protein 1 OS=Homo sapiens GN=LARP1;>sp|Q6PKG0|LARP1_HUMAN La-related protein 1 OS=Homo sapiens GN=LARP1 PE=1 SV=2	La-related protein 1	116.46	1019	0.64389	0.62067	11	1.5937	2.6638	8	13.3	10.1	12	9	206880000	313070000	194290000	105950000
RAN	>tr|B5MDF5|B5MDF5_HUMAN GTP-binding nuclear protein Ran OS=Homo sapiens GN=RAN PE=1 SV=1;>sp|P62826|RAN_HUMAN GTP-binding nuclear protein Ran OS=Homo sapiens GN=RAN PE=1 SV=3;>tr|J3KQE5|J3KQE5_HUMAN GTP-binding nuclear protein Ran (Fragment) OS=Homo sapien	GTP-binding nuclear protein Ran	26.224	233	0.69101	0.61477	3	0.46322	0.765	2	17.6	10.7	4	2	60925000	88288000	13446000	31589000
ACAT1	>sp|P24752|THIL_HUMAN Acetyl-CoA acetyltransferase, mitochondrial OS=Homo sapiens GN=ACAT1 PE=1 SV=1	Acetyl-CoA acetyltransferase, mitochondrial	45.199	427	0.66572	0.61351	3	NA	NA	0	8.7	0	3	0	43937000	45984000	0	0
EIF4A1	>tr|A8K7F6|A8K7F6_HUMAN cDNA FLJ78244, highly similar to Homo sapiens eukaryotic translation initiation factor 4A, isoform 1 (EIF4A1), mRNA OS=Homo sapiens PE=2 SV=1;>sp|P60842|IF4A1_HUMAN Eukaryotic initiation factor 4A-I OS=Homo sapiens GN=EIF4A1 PE=1 SV	Eukaryotic initiation factor 4A-I	46.121	406	0.64361	0.6125	2	0.81051	1.3417	3	8.4	15.3	0	2	26197000	42156000	83209000	92148000
RBM3	>tr|A0A024QYX3|A0A024QYX3_HUMAN RNA binding motif (RNP1, RRM) protein 3, isoform CRA_c OS=Homo sapiens GN=RBM3 PE=4 SV=1;>sp|P98179|RBM3_HUMAN Putative RNA-binding protein 3 OS=Homo sapiens GN=RBM3 PE=1 SV=1	Putative RNA-binding protein 3	17.17	157	0.63506	0.61143	2	1.0575	1.6105	2	31.8	31.8	2	2	81377000	104960000	169710000	147360000
CAST	>tr|E9PSG1|E9PSG1_HUMAN Calpastatin (Fragment) OS=Homo sapiens GN=CAST PE=1 SV=1;>tr|F8W7E0|F8W7E0_HUMAN Calpastatin (Fragment) OS=Homo sapiens GN=CAST PE=1 SV=1;>sp|P20810-9|ICAL_HUMAN Isoform 9 of Calpastatin OS=Homo sapiens GN=CAST;>sp|P20810-5|ICAL_HUM		31.914	304	0.64716	0.61111	2	0.8159	1.2728	3	10.9	11.2	3	3	22440000	32172000	43496000	63791000
MED19;MED19AS	>tr|J3KR33|J3KR33_HUMAN Mediator of RNA polymerase II transcription subunit 19 OS=Homo sapiens GN=MED19 PE=1 SV=1;>sp|A0JLT2-2|MED19_HUMAN Isoform 2 of Mediator of RNA polymerase II transcription subunit 19 OS=Homo sapiens GN=MED19;>sp|A0JLT2|MED19_HUMAN M	Mediator of RNA polymerase II transcription subunit 19	26.287	244	0.58822	0.61092	6	0.68237	1.0436	2	30.3	15.2	4	2	200020000	300090000	117460000	125020000
HMGA1	>sp|P17096|HMGA1_HUMAN High mobility group protein HMG-I/HMG-Y OS=Homo sapiens GN=HMGA1 PE=1 SV=3;>tr|B4DWA0|B4DWA0_HUMAN cDNA FLJ54188, moderately similar to High mobility group protein HMG-I/HMG-Y OS=Homo sapiens PE=2 SV=1;>tr|A0A024RCT9|A0A024RCT9_HUMAN	High mobility group protein HMG-I/HMG-Y	11.676	107	0.62155	0.60587	7	0.40508	0.66806	6	29.9	37.4	2	2	134090000	185690000	200740000	330480000
2009-09-01	>tr|A0A024R8V0|A0A024R8V0_HUMAN Septin 9, isoform CRA_a OS=Homo sapiens GN=SEPT9 PE=3 SV=1;>sp|Q9UHD8-7|SEPT9_HUMAN Isoform 7 of Septin-9 OS=Homo sapiens GN=SEPT9;>sp|Q9UHD8-2|SEPT9_HUMAN Isoform 2 of Septin-9 OS=Homo sapiens GN=SEPT9;>sp|Q9UHD8-5|SEPT9_HU	Septin-9	63.633	568	0.60716	0.60327	4	1.239	1.9495	3	13.2	11.8	7	6	100230000	148820000	69964000	78882000
MAP4	>tr|E7EVA0|E7EVA0_HUMAN Microtubule-associated protein OS=Homo sapiens GN=MAP4 PE=1 SV=1;>sp|P27816-6|MAP4_HUMAN Isoform 6 of Microtubule-associated protein 4 OS=Homo sapiens GN=MAP4;>sp|P27816|MAP4_HUMAN Microtubule-associated protein 4 OS=Homo sapiens GN	Microtubule-associated protein;Microtubule-associated protein 4	245.44	2297	0.62999	0.60242	2	1.6162	2.8808	5	1.4	4.7	2	8	43173000	61111000	144260000	94203000
EPRS	>tr|V9GYZ6|V9GYZ6_HUMAN Bifunctional glutamate/proline--tRNA ligase (Fragment) OS=Homo sapiens GN=EPRS PE=1 SV=1;>tr|Q3KQZ8|Q3KQZ8_HUMAN EPRS protein (Fragment) OS=Homo sapiens GN=EPRS PE=2 SV=1;>tr|B4DKX5|B4DKX5_HUMAN cDNA FLJ56021, highly similar to Bifu	Bifunctional glutamate/proline--tRNA ligase;Glutamate--tRNA ligase;Proline--tRNA ligase	109.04	968	0.62486	0.59731	2	NA	NA	0	2.9	0	2	0	16457000	23762000	0	0
SF3B4	>tr|Q53FG6|Q53FG6_HUMAN Splicing factor 3b, subunit 4 variant (Fragment) OS=Homo sapiens PE=2 SV=1;>tr|B3KUJ0|B3KUJ0_HUMAN cDNA FLJ39996 fis, clone STOMA2002166, highly similar to Splicing factor 3B subunit 4 OS=Homo sapiens PE=2 SV=1;>sp|Q15427|SF3B4_HUMA	Splicing factor 3B subunit 4	44.386	424	0.65375	0.59716	3	0.58871	0.94232	4	11.3	14.6	3	4	113980000	199200000	116360000	209560000
MBNL1;MBLL;MBNL2	>tr|C9JP00|C9JP00_HUMAN Muscleblind-like protein 1 OS=Homo sapiens GN=MBNL1 PE=1 SV=1;>tr|A0A0A0MQX8|A0A0A0MQX8_HUMAN Muscleblind-like protein 1 OS=Homo sapiens GN=MBNL1 PE=4 SV=1;>sp|Q9NR56|MBNL1_HUMAN Muscleblind-like protein 1 OS=Homo sapiens GN=MBNL1 P	Muscleblind-like protein 1;Muscleblind-like protein 2	37.898	348	0.60238	0.59512	4	0.88156	1.4669	6	14.7	18.4	4	6	103880000	169550000	259090000	313530000
POLDIP3;DKFZp434G0310;PDIP46	>tr|F6VRR5|F6VRR5_HUMAN Polymerase delta-interacting protein 3 OS=Homo sapiens GN=POLDIP3 PE=1 SV=1;>sp|Q9BY77|PDIP3_HUMAN Polymerase delta-interacting protein 3 OS=Homo sapiens GN=POLDIP3 PE=1 SV=2;>tr|Q96DI9|Q96DI9_HUMAN POLDIP3 protein (Fragment) OS=Hom	Polymerase delta-interacting protein 3	48.103	438	0.5448	0.594	5	0.77661	1.2768	7	16.7	28.1	5	10	146910000	186400000	233520000	294610000
ENO1	>tr|E2DRY6|E2DRY6_HUMAN Enolase OS=Homo sapiens PE=2 SV=1;>tr|A0A024R4F1|A0A024R4F1_HUMAN Enolase 1, (Alpha), isoform CRA_a OS=Homo sapiens GN=ENO1 PE=3 SV=1;>sp|P06733-2|ENOA_HUMAN Isoform MBP-1 of Alpha-enolase OS=Homo sapiens GN=ENO1;>sp|P06733|ENOA_HUM	Enolase;Alpha-enolase	36.554	338	0.62451	0.59105	4	0.64857	1.0394	2	20.1	7.1	4	2	79025000	131760000	29714000	39137000
IGF2BP1	>sp|Q9NZI8|IF2B1_HUMAN Insulin-like growth factor 2 mRNA-binding protein 1 OS=Homo sapiens GN=IGF2BP1 PE=1 SV=2;>tr|D3DTW3|D3DTW3_HUMAN Insulin-like growth factor 2 mRNA binding protein 1, isoform CRA_a OS=Homo sapiens GN=IGF2BP1 PE=4 SV=1;>sp|Q9NZI8-2|IF2	Insulin-like growth factor 2 mRNA-binding protein 1	63.48	577	0.61923	0.58841	5	0.81552	1.3328	3	8.7	5.9	3	3	127550000	166220000	111690000	131540000
PSPC1	>tr|A0A024RDP4|A0A024RDP4_HUMAN Paraspeckle component 1, isoform CRA_b OS=Homo sapiens GN=PSPC1 PE=4 SV=1;>tr|B4DWI8|B4DWI8_HUMAN cDNA FLJ57805, highly similar to Homo sapiens paraspeckle component 1 (PSPC1), transcript variant alpha, mRNA OS=Homo sapiens	Paraspeckle component 1	45.57	393	0.53072	0.58634	7	1.0139	1.6031	9	19.3	23.7	7	9	219780000	321430000	237120000	223880000
LOC115098;CCDC124	>tr|A0A024R7M8|A0A024R7M8_HUMAN Uncharacterized protein OS=Homo sapiens GN=LOC115098 PE=4 SV=1;>sp|Q96CT7|CC124_HUMAN Coiled-coil domain-containing protein 124 OS=Homo sapiens GN=CCDC124 PE=1 SV=1	Coiled-coil domain-containing protein 124	25.835	223	0.59565	0.58238	2	0.98766	1.6279	5	8.1	21.5	2	5	41541000	55926000	104520000	115810000
GAPDH;HEL-S-162eP	>tr|E7EUT5|E7EUT5_HUMAN Glyceraldehyde-3-phosphate dehydrogenase OS=Homo sapiens GN=GAPDH PE=1 SV=1;>tr|V9HVZ4|V9HVZ4_HUMAN Glyceraldehyde-3-phosphate dehydrogenase OS=Homo sapiens GN=HEL-S-162eP PE=2 SV=1;>tr|Q2TSD0|Q2TSD0_HUMAN Glyceraldehyde-3-phosphate	Glyceraldehyde-3-phosphate dehydrogenase	27.87	260	0.56194	0.5789	5	0.75845	1.1323	4	29.6	25	5	4	108010000	163950000	50005000	70814000
POLR2A	>sp|P24928|RPB1_HUMAN DNA-directed RNA polymerase II subunit RPB1 OS=Homo sapiens GN=POLR2A PE=1 SV=2;>tr|B4DET1|B4DET1_HUMAN cDNA FLJ53860, highly similar to DNA-directed RNA polymerase II largest subunit (EC 2.7.7.6) OS=Homo sapiens PE=2 SV=1	DNA-directed RNA polymerase II subunit RPB1	217.17	1970	0.60746	0.5747	5	0.36293	0.57048	4	5	4.3	5	4	165440000	271510000	76308000	177420000
THOC1	>tr|A0A087WWS1|A0A087WWS1_HUMAN THO complex subunit 1 OS=Homo sapiens GN=THOC1 PE=1 SV=1;>sp|Q96FV9|THOC1_HUMAN THO complex subunit 1 OS=Homo sapiens GN=THOC1 PE=1 SV=1;>tr|J3KT14|J3KT14_HUMAN THO complex subunit 1 OS=Homo sapiens GN=THOC1 PE=1 SV=1;>tr|R4	THO complex subunit 1	75.651	657	0.55702	0.56539	2	NA	NA	1	3.3	2.3	2	1	12828000	24882000	8034700	10609000
CFL1;HEL-S-15;CFL2	>tr|E9PQB7|E9PQB7_HUMAN Cofilin-1 (Fragment) OS=Homo sapiens GN=CFL1 PE=1 SV=1;>tr|G3V1A4|G3V1A4_HUMAN Cofilin 1 (Non-muscle), isoform CRA_a OS=Homo sapiens GN=CFL1 PE=1 SV=1;>tr|E9PP50|E9PP50_HUMAN Cofilin-1 (Fragment) OS=Homo sapiens GN=CFL1 PE=1 SV=3;>t	Cofilin-1;Cofilin-2	13.923	122	0.58433	0.55085	2	NA	NA	0	36.9	0	2	0	15534000	31252000	0	0
CSTF2	>tr|E9PID8|E9PID8_HUMAN Cleavage stimulation factor subunit 2 OS=Homo sapiens GN=CSTF2 PE=1 SV=1;>tr|B4DUD5|B4DUD5_HUMAN cDNA FLJ58787, highly similar to Cleavage stimulation factor 64 kDa subunit OS=Homo sapiens PE=2 SV=1;>tr|E7EWR4|E7EWR4_HUMAN Cleavage	Cleavage stimulation factor subunit 2	46.665	438	0.53508	0.54648	3	0.71933	1.1444	3	8.2	7.8	1	1	43464000	62273000	37641000	37622000
DLGAP5	>tr|B4DMI9|B4DMI9_HUMAN cDNA FLJ55894, highly similar to Discs large homolog 7 OS=Homo sapiens PE=2 SV=1;>tr|A8K732|A8K732_HUMAN cDNA FLJ78771, highly similar to Homo sapiens discs, large homolog 7 (Drosophila), mRNA OS=Homo sapiens PE=2 SV=1;>sp|Q15398-3|	Disks large-associated protein 5	88.928	792	0.54055	0.54634	4	0.94713	1.5131	4	9.6	6.2	7	4	86700000	128290000	83555000	91218000
SFRS14;SUGP2	>tr|A8K5G0|A8K5G0_HUMAN cDNA FLJ76836, highly similar to Homo sapiens splicing factor, arginine/serine-rich 14 (SFRS14), transcript variant 2, mRNA OS=Homo sapiens PE=2 SV=1;>tr|A0A024R7K0|A0A024R7K0_HUMAN Splicing factor, arginine/serine-rich 14, isoform	SURP and G-patch domain-containing protein 2	120.23	1082	0.57327	0.54532	4	1.2701	2.0475	4	4.7	5.7	5	6	73989000	102080000	70583000	41396000
AHNAK	>sp|Q09666|AHNK_HUMAN Neuroblast differentiation-associated protein AHNAK OS=Homo sapiens GN=AHNAK PE=1 SV=2	Neuroblast differentiation-associated protein AHNAK	629.09	5890	0.59009	0.54163	41	1.4884	2.3418	42	25.7	26.1	52	54	1336000000	2209000000	2000900000	1450200000
CCDC50	>sp|Q8IVM0|CCD50_HUMAN Coiled-coil domain-containing protein 50 OS=Homo sapiens GN=CCDC50 PE=1 SV=1;>sp|Q8IVM0-2|CCD50_HUMAN Isoform 2 of Coiled-coil domain-containing protein 50 OS=Homo sapiens GN=CCDC50	Coiled-coil domain-containing protein 50	35.822	306	0.48045	0.54012	9	0.8495	1.4467	14	36.9	47.1	10	11	455530000	796780000	862870000	914920000
EIF5B	>tr|Q8N5A0|Q8N5A0_HUMAN Eukaryotic translation initiation factor 5B OS=Homo sapiens GN=EIF5B PE=2 SV=1;>tr|A0A087WUT6|A0A087WUT6_HUMAN Eukaryotic translation initiation factor 5B OS=Homo sapiens GN=EIF5B PE=1 SV=1;>sp|O60841|IF2P_HUMAN Eukaryotic translati	Eukaryotic translation initiation factor 5B	138.8	1220	0.5968	0.53912	2	1.2245	1.9318	3	2.1	3.4	2	3	20071000	26793000	37073000	43703000
ATXN2L	>tr|A0A024QZC0|A0A024QZC0_HUMAN Ataxin 2-like, isoform CRA_e OS=Homo sapiens GN=ATXN2L PE=4 SV=1;>tr|A0A024QZB7|A0A024QZB7_HUMAN Ataxin 2-like, isoform CRA_b OS=Homo sapiens GN=ATXN2L PE=4 SV=1;>tr|A0A024QZ91|A0A024QZ91_HUMAN Ataxin 2-like, isoform CRA_a O	Ataxin-2-like protein	90.839	846	0.53255	0.53559	7	0.96941	1.5979	7	11.3	18.8	7	14	132610000	234810000	205790000	262520000
GATAD2A	>tr|A0A024R7K7|A0A024R7K7_HUMAN GATA zinc finger domain containing 2A, isoform CRA_b OS=Homo sapiens GN=GATAD2A PE=4 SV=1;>tr|A0A024R7M6|A0A024R7M6_HUMAN GATA zinc finger domain containing 2A, isoform CRA_a OS=Homo sapiens GN=GATAD2A PE=4 SV=1;>sp|Q86YP4-2	Transcriptional repressor p66-alpha	68.062	633	0.52457	0.53284	3	0.82255	1.3347	2	8.8	4.9	3	2	47656000	95135000	39608000	52493000
HEL2;YWHAE;YWHAE/FAM22B fusion;YWHAE/FAM22A fusion	>tr|V9HW98|V9HW98_HUMAN Epididymis luminal protein 2 OS=Homo sapiens GN=HEL2 PE=2 SV=1;>sp|P62258|1433E_HUMAN 14-3-3 protein epsilon OS=Homo sapiens GN=YWHAE PE=1 SV=1;>tr|G9K389|G9K389_HUMAN YWHAE/FAM22B fusion protein (Fragment) OS=Homo sapiens GN=YWHAE/	14-3-3 protein epsilon	29.174	255	0.57045	0.52628	4	0.62492	0.96403	4	20.4	25.9	3	4	100670000	156720000	89061000	128400000
UBAP2	>sp|Q5T6F2|UBAP2_HUMAN Ubiquitin-associated protein 2 OS=Homo sapiens GN=UBAP2 PE=1 SV=1;>tr|B4DZ54|B4DZ54_HUMAN cDNA FLJ61492, highly similar to Homo sapiens ubiquitin associated protein 2 (UBAP2), transcript variant 1, mRNA OS=Homo sapiens PE=2 SV=1;>tr|	Ubiquitin-associated protein 2	117.11	1119	0.56143	0.52582	8	0.80908	1.2287	7	10.2	10.7	5	5	196740000	355650000	309590000	311500000
RPL5	>tr|B3KTM6|B3KTM6_HUMAN Ribosomal protein L5, isoform CRA_b OS=Homo sapiens GN=RPL5 PE=2 SV=1;>tr|A2RUM7|A2RUM7_HUMAN Ribosomal protein L5 OS=Homo sapiens GN=RPL5 PE=2 SV=1;>sp|P46777|RL5_HUMAN 60S ribosomal protein L5 OS=Homo sapiens GN=RPL5 PE=1 SV=3;>tr	60S ribosomal protein L5	28.044	247	0.51408	0.50967	2	0.66093	1.0723	4	8.9	15.4	2	4	24807000	38213000	108790000	162100000
HSPA8;HEL-S-72p;HSPA2	>tr|E9PKE3|E9PKE3_HUMAN Heat shock cognate 71 kDa protein OS=Homo sapiens GN=HSPA8 PE=1 SV=1;>tr|V9HW22|V9HW22_HUMAN Epididymis luminal protein 33 OS=Homo sapiens GN=HEL-S-72p PE=2 SV=1;>sp|P11142|HSP7C_HUMAN Heat shock cognate 71 kDa protein OS=Homo sapie	Heat shock cognate 71 kDa protein;Heat shock-related 70 kDa protein 2	68.805	627	0.51665	0.50409	6	0.36162	0.59296	3	13.4	14.7	4	4	71841000	134350000	46100000	120240000
PRRC2C	>tr|E7EPN9|E7EPN9_HUMAN Protein PRRC2C OS=Homo sapiens GN=PRRC2C PE=1 SV=1;>sp|Q9Y520-6|PRC2C_HUMAN Isoform 6 of Protein PRRC2C OS=Homo sapiens GN=PRRC2C;>sp|Q9Y520-4|PRC2C_HUMAN Isoform 4 of Protein PRRC2C OS=Homo sapiens GN=PRRC2C;>sp|Q9Y520-5|PRC2C_HUMA	Protein PRRC2C	308.77	2819	0.4541	0.50062	3	2.0279	3.3099	6	2.8	3.5	3	4	80977000	132820000	173080000	106570000
CALD1	>tr|E9PGZ1|E9PGZ1_HUMAN Caldesmon OS=Homo sapiens GN=CALD1 PE=1 SV=1;>sp|Q05682-5|CALD1_HUMAN Isoform 5 of Caldesmon OS=Homo sapiens GN=CALD1;>tr|E7EX44|E7EX44_HUMAN Caldesmon OS=Homo sapiens GN=CALD1 PE=1 SV=1;>sp|Q05682-3|CALD1_HUMAN Isoform 3 of Caldesm	Caldesmon	61.705	536	0.47722	0.4987	6	1.6526	2.623	7	15.9	17.9	7	8	78593000	183600000	303140000	271260000
EIF4G1;EIF4G1 variant protein	>tr|E7EX73|E7EX73_HUMAN Eukaryotic translation initiation factor 4 gamma 1 OS=Homo sapiens GN=EIF4G1 PE=1 SV=1;>tr|E9PGM1|E9PGM1_HUMAN Eukaryotic translation initiation factor 4 gamma 1 OS=Homo sapiens GN=EIF4G1 PE=1 SV=1;>tr|E7EUU4|E7EUU4_HUMAN Eukaryotic	Eukaryotic translation initiation factor 4 gamma 1	158.64	1436	0.51382	0.48979	12	2.2781	3.6408	20	12	17.6	10	18	257800000	484990000	807050000	368910000
JUN	>tr|Q6FHK0|Q6FHK0_HUMAN JUN protein (Fragment) OS=Homo sapiens GN=JUN PE=2 SV=1;>sp|P05412|JUN_HUMAN Transcription factor AP-1 OS=Homo sapiens GN=JUN PE=1 SV=2	Transcription factor AP-1	35.723	331	0.48342	0.48875	2	NA	NA	1	8.8	4.5	2	1	39955000	81370000	35908000	60803000
GLTSCR1	>tr|A0A087WWH3|A0A087WWH3_HUMAN Glioma tumor suppressor candidate region gene 1 protein OS=Homo sapiens GN=GLTSCR1 PE=1 SV=1;>sp|Q9NZM4-2|GSCR1_HUMAN Isoform 2 of Glioma tumor suppressor candidate region gene 1 protein OS=Homo sapiens GN=GLTSCR1;>sp|Q9NZM4	Glioma tumor suppressor candidate region gene 1 protein	152.82	1508	0.45719	0.48451	4	NA	NA	0	3.4	0	4	0	27694000	54647000	0	0
EMD	>sp|P50402|EMD_HUMAN Emerin OS=Homo sapiens GN=EMD PE=1 SV=1;>tr|Q5HY57|Q5HY57_HUMAN Emerin OS=Homo sapiens GN=EMD PE=1 SV=1	Emerin	28.994	254	0.47592	0.48154	3	1.0693	1.88	5	19.7	21.3	4	5	105130000	231980000	173590000	158350000
PTBP1	>tr|A6NLN1|A6NLN1_HUMAN Polypyrimidine tract binding protein 1, isoform CRA_b OS=Homo sapiens GN=PTBP1 PE=1 SV=4;>sp|P26599|PTBP1_HUMAN Polypyrimidine tract-binding protein 1 OS=Homo sapiens GN=PTBP1 PE=1 SV=1;>sp|P26599-2|PTBP1_HUMAN Isoform 2 of Polypyri	Polypyrimidine tract-binding protein 1	56.51	527	0.47746	0.48153	8	0.96581	1.5766	9	25.8	22.6	9	9	627090000	1028500000	489360000	460090000
MLLT4	>tr|G1UI22|G1UI22_HUMAN Afadin OS=Homo sapiens GN=MLLT4 PE=2 SV=1;>tr|A8MQ02|A8MQ02_HUMAN Afadin OS=Homo sapiens GN=MLLT4 PE=1 SV=2;>tr|J3KN01|J3KN01_HUMAN Afadin OS=Homo sapiens GN=MLLT4 PE=1 SV=1;>sp|P55196-3|AFAD_HUMAN Isoform 3 of Afadin OS=Homo sapien	Afadin	201.82	1781	0.47467	0.47951	7	1.8652	3.0583	3	6.1	2.3	8	3	150040000	525970000	74736000	52434000
EPB41	>tr|Q4VB86|Q4VB86_HUMAN EPB41 protein OS=Homo sapiens GN=EPB41 PE=2 SV=2;>tr|Q1WWM3|Q1WWM3_HUMAN EPB41 protein (Fragment) OS=Homo sapiens GN=EPB41 PE=2 SV=1;>tr|Q59F12|Q59F12_HUMAN Protein 4.1 variant (Fragment) OS=Homo sapiens PE=2 SV=1;>sp|P11171-4|41_HU	Protein 4.1	69.889	622	0.51184	0.47372	7	2.9428	4.7011	3	16.1	5.1	6	1	111430000	216880000	115330000	44754000
TMPO	>tr|A0A024RBE7|A0A024RBE7_HUMAN Thymopoietin, isoform CRA_c OS=Homo sapiens GN=TMPO PE=4 SV=1;>sp|P42167|LAP2B_HUMAN Lamina-associated polypeptide 2, isoforms beta/gamma OS=Homo sapiens GN=TMPO PE=1 SV=2;>tr|A0A024RBH7|A0A024RBH7_HUMAN Thymopoietin, isofor	Lamina-associated polypeptide 2, isoforms beta/gamma;Thymopoietin;Thymopentin	50.67	454	0.46536	0.47325	16	1.1847	1.9093	20	44.9	52	5	5	1933200000	4252400000	3194100000	2753800000
KTN1;KIAA0430	>tr|A0A024R663|A0A024R663_HUMAN Kinectin 1 (Kinesin receptor), isoform CRA_a OS=Homo sapiens GN=KTN1 PE=4 SV=1;>sp|Q86UP2-2|KTN1_HUMAN Isoform 2 of Kinectin OS=Homo sapiens GN=KTN1;>sp|Q86UP2-3|KTN1_HUMAN Isoform 3 of Kinectin OS=Homo sapiens GN=KTN1;>sp|Q	Kinectin;Meiosis arrest female protein 1	156.27	1357	0.52187	0.47268	2	NA	NA	1	1.4	0.5	2	1	16664000	29436000	5118600	7291300
HMGN4	>tr|A0A024R046|A0A024R046_HUMAN High mobility group nucleosomal binding domain 4, isoform CRA_a OS=Homo sapiens GN=HMGN4 PE=4 SV=1;>sp|O00479|HMGN4_HUMAN High mobility group nucleosome-binding domain-containing protein 4 OS=Homo sapiens GN=HMGN4 PE=1 SV=3	High mobility group nucleosome-binding domain-containing protein 4	9.5388	90	0.38124	0.46177	4	0.27594	0.42661	5	36.7	34.4	3	3	193270000	345890000	152000000	463690000
PHC3	>tr|A5YM43|A5YM43_HUMAN PHC3 protein OS=Homo sapiens GN=PHC3 PE=2 SV=1;>sp|Q8NDX5-2|PHC3_HUMAN Isoform 2 of Polyhomeotic-like protein 3 OS=Homo sapiens GN=PHC3;>sp|Q8NDX5|PHC3_HUMAN Polyhomeotic-like protein 3 OS=Homo sapiens GN=PHC3 PE=1 SV=1;>sp|Q8NDX5-7	Polyhomeotic-like protein 3	106.19	983	0.46719	0.45042	4	0.85743	1.3922	2	5.7	3.9	4	2	76762000	115160000	21600000	31347000
KRT18	>tr|F8VZY9|F8VZY9_HUMAN Keratin, type I cytoskeletal 18 OS=Homo sapiens GN=KRT18 PE=1 SV=1;>tr|B2RA03|B2RA03_HUMAN cDNA, FLJ94640, highly similar to Homo sapiens keratin 18 (KRT18), mRNA OS=Homo sapiens PE=2 SV=1;>tr|A0A024RAY2|A0A024RAY2_HUMAN Keratin 18,	Keratin, type I cytoskeletal 18	43.774	391	0.45169	0.43643	8	2.3052	3.6849	7	31.5	28.4	7	8	189660000	449170000	452780000	2231700000
CD2AP	>sp|Q9Y5K6|CD2AP_HUMAN CD2-associated protein OS=Homo sapiens GN=CD2AP PE=1 SV=1	CD2-associated protein	71.45	639	0.44482	0.42901	19	1.8831	2.9271	15	33.3	30.8	17	15	587490000	1259800000	1126600000	540290000
NOSIP	>tr|M0R3B2|M0R3B2_HUMAN Nitric oxide synthase-interacting protein (Fragment) OS=Homo sapiens GN=NOSIP PE=1 SV=3;>tr|A8K670|A8K670_HUMAN cDNA FLJ75703, highly similar to Homo sapiens nitric oxide synthase interacting protein (NOSIP), mRNA OS=Homo sapiens PE	Nitric oxide synthase-interacting protein	26.891	242	0.47273	0.42596	2	1.1411	1.8694	5	9.5	28.9	2	6	42015000	78130000	145400000	121990000
EL52;HSP90AA1	>tr|K9JA46|K9JA46_HUMAN Epididymis luminal secretory protein 52 OS=Homo sapiens GN=EL52 PE=2 SV=1;>sp|P07900|HS90A_HUMAN Heat shock protein HSP 90-alpha OS=Homo sapiens GN=HSP90AA1 PE=1 SV=5;>sp|P07900-2|HS90A_HUMAN Isoform 2 of Heat shock protein HSP 90-a	Heat shock protein HSP 90-alpha	84.659	732	0.41603	0.42298	11	0.31937	0.51596	6	18.7	18.9	8	7	336110000	550040000	890940000	558840000
TUBB;TUBB2B;TUBB2A;TUBB4A;XTP3TPATP1;TUBB2C;TUBB3	>tr|B7ZAF0|B7ZAF0_HUMAN cDNA, FLJ79164, highly similar to Tubulin beta-7 chain OS=Homo sapiens PE=2 SV=1;>tr|Q5JP53|Q5JP53_HUMAN Tubulin beta chain OS=Homo sapiens GN=TUBB PE=1 SV=1;>tr|Q5SU16|Q5SU16_HUMAN Beta 5-tubulin OS=Homo sapiens GN=TUBB PE=2 SV=1;>	Tubulin beta chain;Tubulin beta-2B chain;Tubulin beta-2A chain;Tubulin beta-4A chain;Tubulin beta-3 chain	46.566	415	0.35934	0.40368	9	0.42136	0.69624	4	28.4	17.3	2	2	207220000	471130000	98786000	217730000
PPIAL4F;HEL-S-69p;PPIAL4A;PPIAL4D;PPIA;PPIAL4G	>tr|B4DM82|B4DM82_HUMAN Peptidyl-prolyl cis-trans isomerase OS=Homo sapiens PE=2 SV=1;>tr|Q71V99|Q71V99_HUMAN Peptidyl-prolyl cis-trans isomerase OS=Homo sapiens PE=2 SV=1;>tr|A0A075B767|A0A075B767_HUMAN Peptidyl-prolyl cis-trans isomerase A-like 4A/B/C OS	Peptidyl-prolyl cis-trans isomerase;Peptidyl-prolyl cis-trans isomerase A-like 4A/B/C;Peptidyl-prolyl cis-trans isomerase A-like 4D;Peptidyl-prolyl cis-trans isomerase A;Peptidyl-prolyl cis-trans isomerase A, N-terminally processed;Peptidyl-prolyl cis-trans isomerase A-like 4G	14.085	129	0.40063	0.38591	2	NA	NA	0	16.3	0	2	0	29495000	61977000	0	0
TUBA1B;TUBA1C;KLK9;TUBA4A	>tr|B3KPS3|B3KPS3_HUMAN cDNA FLJ32131 fis, clone PEBLM2000267, highly similar to Tubulin alpha-ubiquitous chain OS=Homo sapiens PE=2 SV=1;>tr|A8JZY9|A8JZY9_HUMAN cDNA FLJ78587 OS=Homo sapiens PE=2 SV=1;>sp|P68363|TBA1B_HUMAN Tubulin alpha-1B chain OS=Homo	Tubulin alpha-1B chain;Tubulin alpha-1C chain;Tubulin alpha-4A chain	46.241	416	0.36132	0.35422	10	0.49785	0.78131	8	38.5	26.7	1	2	287020000	714790000	269380000	535140000
YWHAZ	>tr|D0PNI1|D0PNI1_HUMAN Epididymis luminal protein 4 OS=Homo sapiens GN=YWHAZ PE=2 SV=1;>tr|E7EX29|E7EX29_HUMAN 14-3-3 protein zeta/delta (Fragment) OS=Homo sapiens GN=YWHAZ PE=1 SV=1;>sp|P63104|1433Z_HUMAN 14-3-3 protein zeta/delta OS=Homo sapiens GN=YWHA	14-3-3 protein zeta/delta	27.745	245	0.31874	0.32565	3	0.2646	0.45285	2	18.8	13.9	3	2	26836000	75122000	12170000	39796000
PRDX1	>tr|A0A0A0MSI0|A0A0A0MSI0_HUMAN Peroxiredoxin-1 (Fragment) OS=Homo sapiens GN=PRDX1 PE=4 SV=1;>tr|B2R4P2|B2R4P2_HUMAN cDNA, FLJ92164, highly similar to Homo sapiens peroxiredoxin 1 (PRDX1), mRNA OS=Homo sapiens PE=2 SV=1;>sp|Q06830|PRDX1_HUMAN Peroxiredoxi	Peroxiredoxin-1	18.976	171	0.34243	0.32263	2	NA	NA	1	10.5	5.8	2	1	20155000	46438000	36243000	25952000
ANXA2;HEL-S-270;ANXA2P2	>tr|H0YMM1|H0YMM1_HUMAN Annexin (Fragment) OS=Homo sapiens GN=ANXA2 PE=1 SV=1;>tr|H0YKS4|H0YKS4_HUMAN Annexin (Fragment) OS=Homo sapiens GN=ANXA2 PE=1 SV=1;>tr|B4DNH8|B4DNH8_HUMAN Annexin OS=Homo sapiens PE=2 SV=1;>tr|H0YMD0|H0YMD0_HUMAN Annexin (Fragment)	Annexin;Annexin A2;Putative annexin A2-like protein	16.458	149	0.33632	0.32081	2	0.36961	0.57832	3	23.5	24.8	3	3	12852000	35687000	19870000	55800000
EIF5	>tr|A0A024R6Q1|A0A024R6Q1_HUMAN Eukaryotic translation initiation factor 5, isoform CRA_b OS=Homo sapiens GN=EIF5 PE=4 SV=1;>sp|P55010|IF5_HUMAN Eukaryotic translation initiation factor 5 OS=Homo sapiens GN=EIF5 PE=1 SV=2;>tr|Q6IBU0|Q6IBU0_HUMAN EIF5 prote	Eukaryotic translation initiation factor 5	49.222	431	0.28154	0.29253	3	1.9329	3.1245	4	10	13.7	4	6	50612000	143400000	156480000	141510000
EPB41L3	>tr|B3KY28|B3KY28_HUMAN cDNA FLJ46689 fis, clone TRACH3012106, highly similar to Band 4.1-like protein 3 OS=Homo sapiens PE=2 SV=1;>tr|A8K968|A8K968_HUMAN cDNA FLJ77757 OS=Homo sapiens PE=2 SV=1;>tr|A0A0A0MRA8|A0A0A0MRA8_HUMAN Band 4.1-like protein 3 OS=Ho	Band 4.1-like protein 3;Band 4.1-like protein 3, N-terminally processed	84.683	756	0.25593	0.25141	3	2.8553	4.5949	3	6.9	8.1	4	3	27387000	88496000	106010000	33405000
FLNA	>tr|Q60FE6|Q60FE6_HUMAN Filamin A OS=Homo sapiens GN=FLNA PE=2 SV=1;>tr|Q60FE5|Q60FE5_HUMAN Filamin A OS=Homo sapiens GN=FLNA PE=1 SV=1;>tr|A6NDY9|A6NDY9_HUMAN Filamin A OS=Homo sapiens GN=FLNA PE=2 SV=4;>tr|A0A087WWY3|A0A087WWY3_HUMAN Filamin-A OS=Homo sa		277.5	2612	0.20587	0.21241	164	4.13	6.2833	126	61.3	60.1	2	1	16859000000	77540000000	68152000000	15549000000
WWOX	>sp|Q9NZC7|WWOX_HUMAN WW domain-containing oxidoreductase OS=Homo sapiens GN=WWOX PE=1 SV=1;>tr|B3KNJ9|B3KNJ9_HUMAN cDNA FLJ14720 fis, clone NT2RP3001495, highly similar to WW domain-containing oxidoreductase (EC 1.1.1.-) OS=Homo sapiens PE=2 SV=1;>tr|A8K5	WW domain-containing oxidoreductase	46.676	414	0.17809	0.183	8	4.1597	6.5205	10	37	19.1	12	7	177790000	828310000	354370000	99704000
FLNA;FLJ00119	>sp|P21333-2|FLNA_HUMAN Isoform 2 of Filamin-A OS=Homo sapiens GN=FLNA;>sp|P21333|FLNA_HUMAN Filamin-A OS=Homo sapiens GN=FLNA PE=1 SV=4;>tr|Q5HY54|Q5HY54_HUMAN Filamin-A OS=Homo sapiens GN=FLNA PE=1 SV=1;>tr|Q8TES4|Q8TES4_HUMAN FLJ00119 protein (Fragment)	Filamin-A	280.01	2639	0.15573	0.17777	2	NA	NA	1	61.5	60	2	1	155100000	679300000	783380000	170680000
DSP variant protein;DSP	>tr|B4E2A0|B4E2A0_HUMAN cDNA FLJ61543, highly similar to Desmoplakin OS=Homo sapiens PE=2 SV=1;>tr|Q4LE79|Q4LE79_HUMAN DSP variant protein (Fragment) OS=Homo sapiens GN=DSP variant protein PE=2 SV=1;>sp|P15924-2|DESP_HUMAN Isoform DPII of Desmoplakin OS=Ho	Desmoplakin	156.3	1350	0.17484	0.17513	2	NA	NA	0	1.9	0	3	0	6547400	29565000	0	0
HEL113;VIM	>tr|V9HWE1|V9HWE1_HUMAN Epididymis luminal protein 113 OS=Homo sapiens GN=HEL113 PE=2 SV=1;>tr|Q53HU8|Q53HU8_HUMAN Vimentin variant (Fragment) OS=Homo sapiens PE=2 SV=1;>sp|P08670|VIME_HUMAN Vimentin OS=Homo sapiens GN=VIM PE=1 SV=4;>tr|B3KRK8|B3KRK8_HUMAN	Vimentin	53.651	466	0.14654	0.14915	5	0.54203	0.83396	2	14.4	7.5	6	4	35037000	240900000	49470000	93621000
CASP8;hCG_16983;Casp8	>tr|H7C0E2|H7C0E2_HUMAN Caspase-8 subunit p10 (Fragment) OS=Homo sapiens GN=CASP8 PE=1 SV=1;>tr|B6CGU5|B6CGU5_HUMAN Caspase 8 splice variant OS=Homo sapiens GN=CASP8 PE=2 SV=1;>tr|B5BU46|B5BU46_HUMAN Caspase 8 isoform C OS=Homo sapiens GN=CASP8 PE=2 SV=1;>	Caspase-8;Caspase-8 subunit p18;Caspase-8 subunit p10	29.48	258	0.13161	0.12022	3	0.052968	0.082187	2	5.4	2.7	2	1	27192000	146300000	9489900	125330000
JUP	>tr|A0A024R1X8|A0A024R1X8_HUMAN Junction plakoglobin, isoform CRA_a OS=Homo sapiens GN=JUP PE=4 SV=1;>sp|P14923|PLAK_HUMAN Junction plakoglobin OS=Homo sapiens GN=JUP PE=1 SV=3	Junction plakoglobin	81.726	745	0.11879	0.11298	2	0.27213	0.42415	2	3.4	4	2	1	6101400	47084000	7368600	25960000
DHRS4	>sp|Q9BTZ2-8|DHRS4_HUMAN Isoform 8 of Dehydrogenase/reductase SDR family member 4 OS=Homo sapiens GN=DHRS4;>sp|Q9BTZ2-4|DHRS4_HUMAN Isoform 4 of Dehydrogenase/reductase SDR family member 4 OS=Homo sapiens GN=DHRS4;>sp|Q9BTZ2|DHRS4_HUMAN Dehydrogenase/reduc	Dehydrogenase/reductase SDR family member 4	23.916	226	0.050526	0.05203	2	0.10595	0.17565	2	5.8	9.7	1	3	5966600	94459000	3441600	119220000
HBB;HBD	>tr|D9YZU5|D9YZU5_HUMAN Hemoglobin, beta OS=Homo sapiens GN=HBB PE=3 SV=1;>tr|C8C504|C8C504_HUMAN Beta-globin OS=Homo sapiens GN=HBB PE=3 SV=1;>sp|P68871|HBB_HUMAN Hemoglobin subunit beta OS=Homo sapiens GN=HBB PE=1 SV=2;>tr|D5FZW3|D5FZW3_HUMAN Beta globin	Hemoglobin subunit beta;LVV-hemorphin-7;Spinorphin;Hemoglobin subunit delta	15.998	147	0.038959	0.03534	3	0.011514	0.017983	2	23.8	23.8	2	2	8667300	397340000	3140500	363790000
	>tr|B4E265|B4E265_HUMAN cDNA FLJ61059, highly similar to Homo sapiens SMC5 structural maintenance of chromosomes 5-like 1 (SMC5L1), mRNA OS=Homo sapiens PE=2 SV=1		85.503	729	NA	NA	0	0.015823	0.027827	3	59.9	72.4	0	2	0	0	27364000	5635900000
SLX4IP	>sp|Q5VYV7|SLX4I_HUMAN Protein SLX4IP OS=Homo sapiens GN=SLX4IP PE=1 SV=1;>tr|H0YD23|H0YD23_HUMAN Protein SLX4IP (Fragment) OS=Homo sapiens GN=SLX4IP PE=4 SV=1	Protein SLX4IP	45.551	408	NA	NA	0	0.086074	0.13569	2	0	6.9	0	2	0	0	3867800	33807000
CYB5A	>tr|Q59F44|Q59F44_HUMAN Cytochrome b-5 isoform 1 variant (Fragment) OS=Homo sapiens PE=2 SV=1;>sp|P00167-2|CYB5_HUMAN Isoform 2 of Cytochrome b5 OS=Homo sapiens GN=CYB5A;>sp|P00167-3|CYB5_HUMAN Isoform 3 of Cytochrome b5 OS=Homo sapiens GN=CYB5A;>sp|P00167	Cytochrome b5	14.572	132	NA	NA	0	0.10916	0.17608	2	9.8	16.7	1	2	0	34272000	6771000	79128000
DCD	>sp|P81605|DCD_HUMAN Dermcidin OS=Homo sapiens GN=DCD PE=1 SV=2;>sp|P81605-2|DCD_HUMAN Isoform 2 of Dermcidin OS=Homo sapiens GN=DCD	Dermcidin;Survival-promoting peptide;DCD-1	11.284	110	NA	NA	1	0.1949	0.31871	2	12.7	12.7	1	2	1845400	34501000	24417000	181450000
RNF169	>sp|Q8NCN4|RN169_HUMAN E3 ubiquitin-protein ligase RNF169 OS=Homo sapiens GN=RNF169 PE=1 SV=2	E3 ubiquitin-protein ligase RNF169	77.193	708	NA	NA	1	0.21283	0.33911	4	3.4	10.6	2	6	3798300	2682200	38227000	97438000
ZCCHC7	>tr|B4E024|B4E024_HUMAN Zinc finger, CCHC domain containing 7, isoform CRA_b OS=Homo sapiens GN=ZCCHC7 PE=2 SV=1;>sp|Q8N3Z6|ZCHC7_HUMAN Zinc finger CCHC domain-containing protein 7 OS=Homo sapiens GN=ZCCHC7 PE=1 SV=2;>tr|Q05DN1|Q05DN1_HUMAN ZCCHC7 protein	Zinc finger CCHC domain-containing protein 7	30.255	253	NA	NA	0	0.2601	0.3833	2	0	7.9	0	2	0	0	4264100	15970000
SLX4	>sp|Q8IY92-2|SLX4_HUMAN Isoform 2 of Structure-specific endonuclease subunit SLX4 OS=Homo sapiens GN=SLX4;>sp|Q8IY92|SLX4_HUMAN Structure-specific endonuclease subunit SLX4 OS=Homo sapiens GN=SLX4 PE=1 SV=3	Structure-specific endonuclease subunit SLX4	165.9	1522	NA	NA	1	0.25307	0.40604	3	0.9	2	1	3	11977000	3005700	12092000	57819000
HEL-S-89n;HSPA5	>tr|B4DEF7|B4DEF7_HUMAN cDNA FLJ60062, highly similar to 78 kDa glucose-regulated protein OS=Homo sapiens PE=2 SV=1;>tr|V9HWB4|V9HWB4_HUMAN Epididymis secretory sperm binding protein Li 89n OS=Homo sapiens GN=HEL-S-89n PE=2 SV=1;>sp|P11021|GRP78_HUMAN 78 k	78 kDa glucose-regulated protein	30.419	278	NA	NA	0	0.29634	0.46752	2	5.8	18.7	0	2	0	0	8246700	31462000
MPHOSPH8	>sp|Q99549|MPP8_HUMAN M-phase phosphoprotein 8 OS=Homo sapiens GN=MPHOSPH8 PE=1 SV=2;>sp|Q99549-2|MPP8_HUMAN Isoform 2 of M-phase phosphoprotein 8 OS=Homo sapiens GN=MPHOSPH8;>tr|B3KS10|B3KS10_HUMAN cDNA FLJ35237 fis, clone PROST2001676, highly similar to	M-phase phosphoprotein 8	97.181	860	NA	NA	1	0.28214	0.47065	3	2	6.7	1	4	9478400	4080800	11548000	32661000
SETX	>sp|Q7Z333-3|SETX_HUMAN Isoform 3 of Probable helicase senataxin OS=Homo sapiens GN=SETX;>sp|Q7Z333|SETX_HUMAN Probable helicase senataxin OS=Homo sapiens GN=SETX PE=1 SV=4;>sp|Q7Z333-4|SETX_HUMAN Isoform 4 of Probable helicase senataxin OS=Homo sapiens GN	Probable helicase senataxin	299.42	2644	NA	NA	1	0.30298	0.51093	2	0.5	1.7	1	3	6989700	3620200	6688900	32695000
MDK	>tr|E9PPJ5|E9PPJ5_HUMAN Midkine (Fragment) OS=Homo sapiens GN=MDK PE=4 SV=1;>tr|E9PLM6|E9PLM6_HUMAN Midkine OS=Homo sapiens GN=MDK PE=4 SV=1;>sp|P21741|MK_HUMAN Midkine OS=Homo sapiens GN=MDK PE=1 SV=1;>sp|P21741-2|MK_HUMAN Isoform 2 of Midkine OS=Homo sap	Midkine	14.374	131	NA	NA	1	0.32317	0.52372	3	7.6	13	1	2	25385000	37439000	39951000	115640000
DKFZp686L1814;LIN54;DKFZp686L18142	>tr|A0A024RDD8|A0A024RDD8_HUMAN Uncharacterized protein OS=Homo sapiens GN=DKFZp686L1814 PE=4 SV=1;>sp|Q6MZP7-2|LIN54_HUMAN Isoform 2 of Protein lin-54 homolog OS=Homo sapiens GN=LIN54;>sp|Q6MZP7|LIN54_HUMAN Protein lin-54 homolog OS=Homo sapiens GN=LIN54	Protein lin-54 homolog	79.493	749	NA	NA	1	0.35001	0.55254	3	1.1	3.6	1	3	9583500	5243100	8561600	28333000
CDCA5	>tr|A0A024R5D6|A0A024R5D6_HUMAN Cell division cycle associated 5, isoform CRA_a OS=Homo sapiens GN=CDCA5 PE=4 SV=1;>tr|B5MBX0|B5MBX0_HUMAN Sororin OS=Homo sapiens GN=CDCA5 PE=1 SV=1;>sp|Q96FF9|CDCA5_HUMAN Sororin OS=Homo sapiens GN=CDCA5 PE=1 SV=1;>tr|B3KS	Sororin	27.6	252	NA	NA	1	0.35011	0.55567	2	5.6	8.7	1	2	64167000	66365000	32546000	97213000
RPN1	>tr|Q96HX3|Q96HX3_HUMAN Dolichyl-diphosphooligosaccharide--protein glycosyltransferase subunit 1 (Fragment) OS=Homo sapiens PE=2 SV=1;>tr|Q6IBR0|Q6IBR0_HUMAN Dolichyl-diphosphooligosaccharide--protein glycosyltransferase subunit 1 OS=Homo sapiens GN=RPN1 P	Dolichyl-diphosphooligosaccharide--protein glycosyltransferase subunit 1	64.581	568	NA	NA	1	0.36294	0.58405	2	3.2	5.8	1	3	29436000	24953000	12585000	40941000
PTBP2	>tr|B4DSU5|B4DSU5_HUMAN cDNA FLJ55583, highly similar to Polypyrimidine tract-binding protein 2 OS=Homo sapiens PE=2 SV=1;>tr|B4DSS8|B4DSS8_HUMAN cDNA FLJ55936, highly similar to Polypyrimidine tract-binding protein 2 OS=Homo sapiens PE=2 SV=1;>sp|Q9UKA9|P	Polypyrimidine tract-binding protein 2	58.631	540	NA	NA	1	0.33954	0.59268	2	3.7	8.1	1	3	21419000	5847300	15056000	55678000
SURF6	>tr|B3KNS8|B3KNS8_HUMAN cDNA FLJ30322 fis, clone BRACE2006703, highly similar to Surfeit locus protein 6 OS=Homo sapiens PE=2 SV=1;>sp|O75683|SURF6_HUMAN Surfeit locus protein 6 OS=Homo sapiens GN=SURF6 PE=1 SV=3	Surfeit locus protein 6	41.508	361	NA	NA	1	0.37097	0.59521	2	6.1	3.6	2	2	6634300	4014700	4168400	12836000
GTSE1	>tr|A0A024R4V8|A0A024R4V8_HUMAN G-2 and S-phase expressed 1, isoform CRA_b OS=Homo sapiens GN=GTSE1 PE=4 SV=1;>tr|B4DZT6|B4DZT6_HUMAN cDNA FLJ54919, highly similar to G2 and S phase expressed protein 1 OS=Homo sapiens PE=2 SV=1;>sp|Q9NYZ3|GTSE1_HUMAN G2 an	G2 and S phase-expressed protein 1	61.573	586	NA	NA	1	0.37438	0.60045	3	2.7	7	1	3	18058000	23986000	35977000	56105000
ZNF711	>tr|B4DS73|B4DS73_HUMAN cDNA FLJ50847, highly similar to Homo sapiens zinc finger protein 6 (CMPX1) (ZNF6), mRNA OS=Homo sapiens PE=2 SV=1;>sp|Q9Y462|ZN711_HUMAN Zinc finger protein 711 OS=Homo sapiens GN=ZNF711 PE=1 SV=2;>sp|Q9Y462-2|ZN711_HUMAN Isoform 2	Zinc finger protein 711	56.365	477	NA	NA	0	0.3945	0.61444	4	1.7	5.9	0	2	0	0	26805000	62912000
POLH	>tr|B3KVC6|B3KVC6_HUMAN cDNA FLJ16395 fis, clone TRACH2024139, highly similar to DNA polymerase eta (EC 2.7.7.7) (Fragment) OS=Homo sapiens PE=2 SV=1;>tr|B7ZA36|B7ZA36_HUMAN cDNA, FLJ79050, highly similar to DNA polymerase eta (EC 2.7.7.7) OS=Homo sapiens	DNA polymerase eta	67.652	617	NA	NA	0	0.39752	0.61981	2	0	3.2	0	2	0	0	7748200	19002000
PAF1	>tr|B4DGJ5|B4DGJ5_HUMAN RNA polymerase II-associated factor 1 homolog OS=Homo sapiens GN=PAF1 PE=1 SV=1;>tr|A0A024R0H6|A0A024R0H6_HUMAN Paf1, RNA polymerase II associated factor, homolog (S. cerevisiae), isoform CRA_a OS=Homo sapiens GN=PAF1 PE=4 SV=1;>sp|	RNA polymerase II-associated factor 1 homolog	32.92	288	NA	NA	1	0.40434	0.63642	2	4.9	8.3	1	2	9250800	9488700	12651000	32601000
HSD17B10	>sp|Q99714|HCD2_HUMAN 3-hydroxyacyl-CoA dehydrogenase type-2 OS=Homo sapiens GN=HSD17B10 PE=1 SV=3	3-hydroxyacyl-CoA dehydrogenase type-2	26.923	261	NA	NA	1	0.4142	0.64602	2	3.1	10.7	1	2	7702100	7259400	12711000	22001000
ZC3H4	>tr|M0QY97|M0QY97_HUMAN Zinc finger CCCH domain-containing protein 4 (Fragment) OS=Homo sapiens GN=ZC3H4 PE=1 SV=1;>sp|Q9UPT8|ZC3H4_HUMAN Zinc finger CCCH domain-containing protein 4 OS=Homo sapiens GN=ZC3H4 PE=1 SV=3	Zinc finger CCCH domain-containing protein 4	95.425	910	NA	NA	1	0.40299	0.64964	3	1.4	4.4	1	2	10415000	14707000	23897000	48787000
FARSB	>tr|Q9BR63|Q9BR63_HUMAN FARSB protein (Fragment) OS=Homo sapiens GN=FARSB PE=2 SV=2;>tr|A8K666|A8K666_HUMAN cDNA FLJ75460, highly similar to Homo sapiens phenylalanine-tRNA synthetase-like, beta subunit, mRNA OS=Homo sapiens PE=2 SV=1;>sp|Q9NSD9|SYFB_HUMAN	Phenylalanine--tRNA ligase beta subunit	65.7	585	NA	NA	1	0.41279	0.65571	2	1.9	3.1	1	2	6980100	10219000	22176000	57235000
SEC16A	>tr|A4QN19|A4QN19_HUMAN SEC16A protein (Fragment) OS=Homo sapiens GN=SEC16A PE=2 SV=1;>tr|A4QN18|A4QN18_HUMAN SEC16A protein (Fragment) OS=Homo sapiens GN=SEC16A PE=2 SV=1;>tr|F1T0I1|F1T0I1_HUMAN Protein transport protein Sec16A OS=Homo sapiens GN=SEC16A P	Protein transport protein Sec16A	186.49	1727	NA	NA	1	0.40823	0.66462	2	0.9	1.6	1	2	12428000	18163000	12532000	32882000
PHF14	>tr|B4DG57|B4DG57_HUMAN cDNA FLJ61230, highly similar to PHD finger protein 14 OS=Homo sapiens PE=2 SV=1;>sp|O94880-2|PHF14_HUMAN Isoform 2 of PHD finger protein 14 OS=Homo sapiens GN=PHF14;>sp|O94880|PHF14_HUMAN PHD finger protein 14 OS=Homo sapiens GN=PH	PHD finger protein 14	68.571	603	NA	NA	0	0.40754	0.66594	2	0	4.3	0	2	0	0	16247000	37265000
SENP6	>tr|D6RG09|D6RG09_HUMAN Sentrin-specific protease 6 (Fragment) OS=Homo sapiens GN=SENP6 PE=4 SV=1;>tr|H0Y4F4|H0Y4F4_HUMAN Sentrin-specific protease 6 (Fragment) OS=Homo sapiens GN=SENP6 PE=1 SV=1;>tr|F8W6D9|F8W6D9_HUMAN Sentrin-specific protease 6 OS=Homo	Sentrin-specific protease 6	24.816	220	NA	NA	1	0.41166	0.67157	2	6.4	18.2	1	3	25711000	8049900	18652000	42975000
COX4I1	>tr|H3BN72|H3BN72_HUMAN Cytochrome c oxidase subunit 4 isoform 1, mitochondrial OS=Homo sapiens GN=COX4I1 PE=1 SV=1;>tr|H3BNV9|H3BNV9_HUMAN Cytochrome c oxidase subunit 4 isoform 1, mitochondrial OS=Homo sapiens GN=COX4I1 PE=1 SV=1;>sp|P13073|COX41_HUMAN C	Cytochrome c oxidase subunit 4 isoform 1, mitochondrial	14.368	126	NA	NA	0	0.43886	0.68987	3	0	24.6	0	3	0	0	43709000	91999000
ICE1	>sp|Q9Y2F5|ICE1_HUMAN Little elongation complex subunit 1 OS=Homo sapiens GN=ICE1 PE=1 SV=5	Little elongation complex subunit 1	247.89	2266	NA	NA	1	0.43265	0.69657	4	0.5	2.2	1	4	4023900	3075800	14156000	27564000
	>sp|Q9ULL5-3|PRR12_HUMAN Isoform 3 of Proline-rich protein 12 OS=Homo sapiens GN=PRR12		211.04	2036	NA	NA	0	0.44432	0.70264	2	0.6	1.6	1	2	0	0	13624000	26033000
PHF2	>sp|O75151|PHF2_HUMAN Lysine-specific demethylase PHF2 OS=Homo sapiens GN=PHF2 PE=1 SV=4;>tr|E7ET14|E7ET14_HUMAN Lysine-specific demethylase PHF2 OS=Homo sapiens GN=PHF2 PE=1 SV=3;>tr|A0A087WW48|A0A087WW48_HUMAN Lysine-specific demethylase PHF2 OS=Homo sap	Lysine-specific demethylase PHF2	120.77	1096	NA	NA	0	0.45485	0.70518	3	0	3.4	0	2	0	0	32867000	62128000
COX6B1	>sp|P14854|CX6B1_HUMAN Cytochrome c oxidase subunit 6B1 OS=Homo sapiens GN=COX6B1 PE=1 SV=2	Cytochrome c oxidase subunit 6B1	10.192	86	NA	NA	0	0.43102	0.71154	2	0	26.7	0	2	0	0	27250000	61529000
BCAS2	>tr|B2R7W3|B2R7W3_HUMAN Breast carcinoma amplified sequence 2 OS=Homo sapiens GN=BCAS2 PE=2 SV=1;>sp|O75934|SPF27_HUMAN Pre-mRNA-splicing factor SPF27 OS=Homo sapiens GN=BCAS2 PE=1 SV=1;>tr|Q53HE3|Q53HE3_HUMAN Breast carcinoma amplified sequence 2 variant	Pre-mRNA-splicing factor SPF27	26.131	225	NA	NA	1	0.40421	0.71237	2	5.8	11.1	1	2	28540000	22367000	7016800	14299000
LIN28B	>tr|A7E2T3|A7E2T3_HUMAN LIN28B protein (Fragment) OS=Homo sapiens GN=LIN28B PE=2 SV=1;>sp|Q6ZN17|LN28B_HUMAN Protein lin-28 homolog B OS=Homo sapiens GN=LIN28B PE=1 SV=1;>sp|Q6ZN17-2|LN28B_HUMAN Isoform 2 of Protein lin-28 homolog B OS=Homo sapiens GN=LIN2	Protein lin-28 homolog B	24.874	227	NA	NA	1	0.45476	0.72916	2	11.5	9.3	2	2	8065900	6773300	15067000	26645000
CBX2	>sp|Q14781|CBX2_HUMAN Chromobox protein homolog 2 OS=Homo sapiens GN=CBX2 PE=1 SV=2	Chromobox protein homolog 2	56.08	532	NA	NA	1	0.47362	0.73476	3	2.8	4.9	1	2	3691200	3671400	9055900	20942000
SS18L1	>tr|B4DSR7|B4DSR7_HUMAN cDNA FLJ58470, highly similar to SS18-like protein 1 OS=Homo sapiens PE=2 SV=1;>sp|O75177|CREST_HUMAN Calcium-responsive transactivator OS=Homo sapiens GN=SS18L1 PE=1 SV=2;>sp|O75177-2|CREST_HUMAN Isoform 2 of Calcium-responsive tra	Calcium-responsive transactivator	45.29	416	NA	NA	1	0.41357	0.75147	3	2.9	6	1	2	10607000	3998800	19178000	45221000
BRD8	>tr|B4DEG9|B4DEG9_HUMAN cDNA FLJ58448, highly similar to Bromodomain-containing protein 8 OS=Homo sapiens PE=2 SV=1;>tr|H7C179|H7C179_HUMAN Bromodomain-containing protein 8 (Fragment) OS=Homo sapiens GN=BRD8 PE=1 SV=1;>tr|B4DN43|B4DN43_HUMAN cDNA FLJ58202,	Bromodomain-containing protein 8	91.079	837	NA	NA	1	0.43958	0.75163	2	1.3	2.5	1	2	18358000	8814100	7276600	18884000
CKMT1A	>sp|P12532|KCRU_HUMAN Creatine kinase U-type, mitochondrial OS=Homo sapiens GN=CKMT1A PE=1 SV=1;>sp|P12532-2|KCRU_HUMAN Isoform 2 of Creatine kinase U-type, mitochondrial OS=Homo sapiens GN=CKMT1A	Creatine kinase U-type, mitochondrial	47.036	417	NA	NA	0	0.49609	0.77579	2	0	7.2	0	2	0	0	32198000	55824000
PDS5B	>tr|B7Z5S1|B7Z5S1_HUMAN cDNA FLJ61699, highly similar to Homo sapiens androgen-induced proliferation inhibitor (APRIN), transcript variant 1, mRNA OS=Homo sapiens PE=2 SV=1;>sp|Q9NTI5-2|PDS5B_HUMAN Isoform 2 of Sister chromatid cohesion protein PDS5 homolo	Sister chromatid cohesion protein PDS5 homolog B	148.74	1302	NA	NA	1	0.49138	0.78078	2	2.2	4.8	1	2	33296000	31834000	25666000	41829000
ZNF143;ZNF777;SALL3;SALL1;HEL-S-89;ZNF774	>tr|Q9H176|Q9H176_HUMAN ZNF143 protein (Fragment) OS=Homo sapiens GN=ZNF143 PE=4 SV=1;>tr|E7EN86|E7EN86_HUMAN Zinc finger protein 143 OS=Homo sapiens GN=ZNF143 PE=1 SV=1;>sp|P52747-2|ZN143_HUMAN Isoform 2 of Zinc finger protein 143 OS=Homo sapiens GN=ZNF14	Zinc finger protein 143;Zinc finger protein 774;Zinc finger protein 777;Sal-like protein 3;Sal-like protein 1	57.265	531	NA	NA	0	0.43341	0.78284	2	0	3.4	0	1	0	0	3694300	7343900
RECQL5;PP1045	>tr|Q6P4G0|Q6P4G0_HUMAN ATP-dependent DNA helicase Q5 OS=Homo sapiens GN=RECQL5 PE=1 SV=1;>tr|A5YM55|A5YM55_HUMAN RECQL5 protein OS=Homo sapiens GN=RECQL5 PE=2 SV=1;>tr|A0A024R8M9|A0A024R8M9_HUMAN RecQ protein-like 5, isoform CRA_a OS=Homo sapiens GN=RECQL	ATP-dependent DNA helicase Q5	106.05	964	NA	NA	0	0.49673	0.78307	2	0	2	0	2	0	0	13877000	18994000
DNCL1;DYNLL2;DYNLL1	>tr|Q6FGH9|Q6FGH9_HUMAN DNCL1 protein OS=Homo sapiens GN=DNCL1 PE=2 SV=1;>sp|Q96FJ2|DYL2_HUMAN Dynein light chain 2, cytoplasmic OS=Homo sapiens GN=DYNLL2 PE=1 SV=1;>sp|P63167|DYL1_HUMAN Dynein light chain 1, cytoplasmic OS=Homo sapiens GN=DYNLL1 PE=1 SV=1	Dynein light chain 2, cytoplasmic;Dynein light chain 1, cytoplasmic	10.366	89	NA	NA	0	0.49888	0.78711	2	12.4	24.7	1	2	0	0	16135000	30183000
IRS4	>sp|O14654|IRS4_HUMAN Insulin receptor substrate 4 OS=Homo sapiens GN=IRS4 PE=1 SV=1	Insulin receptor substrate 4	133.77	1257	NA	NA	1	0.49912	0.80851	3	1.2	5.3	1	3	15099000	14478000	23092000	46556000
NDUFV2	>tr|Q9UEH5|Q9UEH5_HUMAN 24-kDa subunit of complex I (Fragment) OS=Homo sapiens GN=NDUFV2 PE=4 SV=1;>tr|Q6IPW4|Q6IPW4_HUMAN NADH dehydrogenase (Ubiquinone) flavoprotein 2, 24kDa OS=Homo sapiens GN=NDUFV2 PE=2 SV=1;>tr|Q6IB76|Q6IB76_HUMAN NDUFV2 protein OS=H	NADH dehydrogenase [ubiquinone] flavoprotein 2, mitochondrial	25.43	231	NA	NA	1	0.53192	0.82607	2	5.6	9.1	1	2	54286000	46780000	46882000	85696000
SEC61B	>tr|Q53FA5|Q53FA5_HUMAN Protein translocation complex beta variant (Fragment) OS=Homo sapiens PE=2 SV=1;>sp|P60468|SC61B_HUMAN Protein transport protein Sec61 subunit beta OS=Homo sapiens GN=SEC61B PE=1 SV=2;>tr|S4R3B5|S4R3B5_HUMAN Protein transport protei	Protein transport protein Sec61 subunit beta	10.043	96	NA	NA	1	0.52554	0.83806	2	10.4	26	1	2	20299000	20846000	21250000	38244000
C3orf63	>tr|A0A024R363|A0A024R363_HUMAN Chromosome 3 open reading frame 63, isoform CRA_b OS=Homo sapiens GN=C3orf63 PE=4 SV=1		140.05	1233	NA	NA	1	0.5299	0.83826	2	29.5	29.5	1	2	45755000	77756000	47212000	81544000
MRPL1	>tr|A0PJ79|A0PJ79_HUMAN MRPL1 protein (Fragment) OS=Homo sapiens GN=MRPL1 PE=2 SV=1;>sp|Q9BYD6|RM01_HUMAN 39S ribosomal protein L1, mitochondrial OS=Homo sapiens GN=MRPL1 PE=1 SV=2;>tr|H0YAB5|H0YAB5_HUMAN 39S ribosomal protein L1, mitochondrial (Fragment)	39S ribosomal protein L1, mitochondrial	34.446	302	NA	NA	0	0.53348	0.84344	2	0	7.9	0	2	0	0	45613000	63382000
CROP;LUC7L3	>tr|Q6PKC2|Q6PKC2_HUMAN CROP protein (Fragment) OS=Homo sapiens GN=CROP PE=2 SV=1;>tr|Q86Y74|Q86Y74_HUMAN CROP protein (Fragment) OS=Homo sapiens GN=CROP PE=2 SV=1;>tr|A8K3C5|A8K3C5_HUMAN cDNA FLJ77715, highly similar to Homo sapiens cisplatin resistance-a	Luc7-like protein 3	27.016	236	NA	NA	1	0.56924	0.85001	3	13.6	18.2	2	3	33548000	35749000	89588000	209850000
RBM6	>tr|A8K6Q4|A8K6Q4_HUMAN cDNA FLJ76888, highly similar to Homo sapiens RNA binding motif protein 6 (RBM6), mRNA OS=Homo sapiens PE=2 SV=1;>sp|P78332|RBM6_HUMAN RNA-binding protein 6 OS=Homo sapiens GN=RBM6 PE=1 SV=5;>tr|E9PGM9|E9PGM9_HUMAN RNA-binding prote	RNA-binding protein 6	128.62	1123	NA	NA	0	0.56263	0.85283	3	1.2	4.3	0	3	0	0	23374000	32792000
CWF19L2	>sp|Q2TBE0-3|C19L2_HUMAN Isoform 3 of CWF19-like protein 2 OS=Homo sapiens GN=CWF19L2;>sp|Q2TBE0-2|C19L2_HUMAN Isoform 2 of CWF19-like protein 2 OS=Homo sapiens GN=CWF19L2;>sp|Q2TBE0|C19L2_HUMAN CWF19-like protein 2 OS=Homo sapiens GN=CWF19L2 PE=1 SV=4;>tr	CWF19-like protein 2	77.598	672	NA	NA	1	0.54237	0.85665	2	2.2	3.1	1	2	13954000	14821000	25293000	35751000
NDUFA10	>tr|Q7Z518|Q7Z518_HUMAN NADH dehydrogenase OS=Homo sapiens PE=2 SV=1;>tr|A8K413|A8K413_HUMAN cDNA FLJ76144, highly similar to Homo sapiens NADH dehydrogenase (ubiquinone) 1 alpha subcomplex, 10, 42kDa (NDUFA10), mRNA OS=Homo sapiens PE=2 SV=1;>tr|A0A087WXC	NADH dehydrogenase [ubiquinone] 1 alpha subcomplex subunit 10, mitochondrial	40.676	354	NA	NA	1	0.54768	0.86177	3	8.8	19.5	2	5	34358000	35842000	154920000	114860000
ATXN2	>tr|F8WB06|F8WB06_HUMAN Ataxin-2 OS=Homo sapiens GN=ATXN2 PE=1 SV=1;>tr|H0YH87|H0YH87_HUMAN Ataxin-2 (Fragment) OS=Homo sapiens GN=ATXN2 PE=1 SV=1;>sp|Q99700-2|ATX2_HUMAN Isoform 2 of Ataxin-2 OS=Homo sapiens GN=ATXN2;>tr|F8WB05|F8WB05_HUMAN Ataxin-2 (Frag	Ataxin-2	113.88	1050	NA	NA	1	0.51717	0.86221	6	2.5	6.8	0	1	25188000	29095000	87777000	158910000
RAD51AP1	>tr|A8K313|A8K313_HUMAN cDNA FLJ78249, highly similar to Homo sapiens RAD51 associated protein 1, mRNA OS=Homo sapiens PE=2 SV=1;>sp|Q96B01-2|R51A1_HUMAN Isoform 2 of RAD51-associated protein 1 OS=Homo sapiens GN=RAD51AP1;>sp|Q96B01|R51A1_HUMAN RAD51-assoc	RAD51-associated protein 1	38.466	352	NA	NA	1	0.54824	0.86565	2	2.8	8.8	1	2	9080000	9488400	25892000	58616000
NDUFV3	>tr|Q96DP0|Q96DP0_HUMAN cDNA FLJ31479 fis, clone NT2NE2001634, moderately similar to NADH-UBIQUINONE OXIDOREDUCTASE 9 KD SUBUNIT (EC 1.6.5.3) OS=Homo sapiens PE=2 SV=1;>sp|P56181-2|NDUV3_HUMAN Isoform 2 of NADH dehydrogenase [ubiquinone] flavoprotein 3, mi	NADH dehydrogenase [ubiquinone] flavoprotein 3, mitochondrial	49.244	456	NA	NA	0	0.56299	0.86974	4	0	11.4	0	2	0	0	105470000	237670000
MSL1	>tr|J3QQY0|J3QQY0_HUMAN Male-specific lethal 1 homolog OS=Homo sapiens GN=MSL1 PE=1 SV=1;>tr|J3KSZ8|J3KSZ8_HUMAN Male-specific lethal 1 homolog OS=Homo sapiens GN=MSL1 PE=1 SV=1;>sp|Q68DK7|MSL1_HUMAN Male-specific lethal 1 homolog OS=Homo sapiens GN=MSL1 P	Male-specific lethal 1 homolog	48.976	461	NA	NA	1	0.54472	0.87328	2	2.8	7.4	1	2	10035000	13458000	14729000	27075000
NOL10	>tr|B4DS83|B4DS83_HUMAN cDNA FLJ53179, highly similar to Nucleolar protein 10 OS=Homo sapiens PE=2 SV=1;>sp|Q9BSC4-2|NOL10_HUMAN Isoform 2 of Nucleolar protein 10 OS=Homo sapiens GN=NOL10;>sp|Q9BSC4-4|NOL10_HUMAN Isoform 4 of Nucleolar protein 10 OS=Homo s	Nucleolar protein 10	74.412	638	NA	NA	0	0.54572	0.87682	2	0	3.9	0	2	0	0	25867000	32056000
MEAF6	>sp|Q9HAF1-2|EAF6_HUMAN Isoform 2 of Chromatin modification-related protein MEAF6 OS=Homo sapiens GN=MEAF6;>sp|Q9HAF1|EAF6_HUMAN Chromatin modification-related protein MEAF6 OS=Homo sapiens GN=MEAF6 PE=1 SV=1;>sp|Q9HAF1-4|EAF6_HUMAN Isoform 4 of Chromatin	Chromatin modification-related protein MEAF6	21.624	191	NA	NA	0	0.53043	0.89937	2	0	12	0	2	0	0	37072000	56713000
L1RE1	>tr|O00373|O00373_HUMAN P40 OS=Homo sapiens PE=4 SV=1;>tr|Q9UN78|Q9UN78_HUMAN Uncharacterized protein OS=Homo sapiens PE=4 SV=1;>tr|Q8TE29|Q8TE29_HUMAN Putative uncharacterized protein OS=Homo sapiens PE=4 SV=1;>tr|Q15401|Q15401_HUMAN Line-1 repeat mRNA wi	LINE-1 retrotransposable element ORF1 protein	39.855	337	NA	NA	0	0.54817	0.89999	3	0	10.1	0	3	0	0	58960000	73425000
ZNF845;ZNF808	>sp|Q96IR2|ZN845_HUMAN Zinc finger protein 845 OS=Homo sapiens GN=ZNF845 PE=2 SV=3;>sp|Q8N4W9-2|ZN808_HUMAN Isoform 2 of Zinc finger protein 808 OS=Homo sapiens GN=ZNF808;>sp|Q8N4W9|ZN808_HUMAN Zinc finger protein 808 OS=Homo sapiens GN=ZNF808 PE=2 SV=2	Zinc finger protein 845;Zinc finger protein 808	113.13	970	NA	NA	1	0.50018	0.91013	2	8	9	1	1	14795000	9532000	11188000	23537000
ATPIF1	>sp|Q9UII2|ATIF1_HUMAN ATPase inhibitor, mitochondrial OS=Homo sapiens GN=ATPIF1 PE=1 SV=1	ATPase inhibitor, mitochondrial	12.249	106	NA	NA	0	0.6059	0.91686	4	0	10.4	0	2	0	0	15590000	25418000
RAE1	>tr|E9PPG9|E9PPG9_HUMAN mRNA export factor OS=Homo sapiens GN=RAE1 PE=1 SV=1;>tr|Q5J8M4|Q5J8M4_HUMAN Migration-inducing gene 14 OS=Homo sapiens PE=2 SV=1;>tr|E9PQ57|E9PQ57_HUMAN mRNA export factor OS=Homo sapiens GN=RAE1 PE=1 SV=1;>sp|P78406|RAE1L_HUMAN mR	mRNA export factor	24.061	217	NA	NA	1	0.58525	0.94253	2	6.9	12.9	1	2	27754000	26459000	35395000	53239000
IMMT	>tr|B9A067|B9A067_HUMAN MICOS complex subunit MIC60 OS=Homo sapiens GN=IMMT PE=1 SV=2;>tr|B4DQY2|B4DQY2_HUMAN cDNA FLJ59388, highly similar to Mitochondrial inner membrane protein OS=Homo sapiens PE=2 SV=1;>tr|B4DKR1|B4DKR1_HUMAN cDNA FLJ51884, highly simi	MICOS complex subunit MIC60	78.973	711	NA	NA	1	0.60417	0.95029	3	1.4	8.7	1	4	440500	1093400	43313000	86354000
COX4NB;EMC8	>tr|Q53Y03|Q53Y03_HUMAN COX4 neighbor, isoform CRA_a OS=Homo sapiens GN=COX4NB PE=2 SV=1;>sp|O43402|EMC8_HUMAN ER membrane protein complex subunit 8 OS=Homo sapiens GN=EMC8 PE=1 SV=1;>sp|O43402-2|EMC8_HUMAN Isoform 2 of ER membrane protein complex subunit	ER membrane protein complex subunit 8	23.773	210	NA	NA	1	0.58923	0.96337	2	8.1	9.5	2	2	36297000	20609000	16899000	25398000
MTX2	>tr|C9JNK6|C9JNK6_HUMAN Metaxin-2 OS=Homo sapiens GN=MTX2 PE=1 SV=1;>tr|B7Z9F3|B7Z9F3_HUMAN cDNA, FLJ78817, highly similar to Metaxin-2 OS=Homo sapiens PE=2 SV=1;>sp|O75431-2|MTX2_HUMAN Isoform 2 of Metaxin-2 OS=Homo sapiens GN=MTX2;>sp|O75431|MTX2_HUMAN M	Metaxin-2	23.643	207	NA	NA	0	0.60479	0.96503	3	0	21.7	0	3	0	0	59495000	96815000
EIF2S3;EIF2S3L	>tr|Q53HK3|Q53HK3_HUMAN Eukaryotic translation initiation factor 2, subunit 3 gamma, 52kDa variant (Fragment) OS=Homo sapiens PE=2 SV=1;>tr|B2R5N2|B2R5N2_HUMAN cDNA, FLJ92541, highly similar to Homo sapiens eukaryotic translation initiation factor 2, subun	Putative eukaryotic translation initiation factor 2 subunit 3-like protein;Eukaryotic translation initiation factor 2 subunit 3	51.082	472	NA	NA	1	0.6073	0.96557	2	3	6.4	1	2	12638000	12252000	17180000	32054000
PELP1	>tr|O15451|O15451_HUMAN Proline and glutamic acid rich nuclear protein isoform (Fragment) OS=Homo sapiens PE=1 SV=2;>tr|A8K548|A8K548_HUMAN cDNA FLJ75008, highly similar to Homo sapiens proline-, glutamic acid-, leucine-rich protein 1 (PELP1), mRNA OS=Homo	Proline-, glutamic acid- and leucine-rich protein 1	109.02	1021	NA	NA	1	0.61275	0.9722	2	1.4	2.1	1	2	11949000	9522900	13720000	18327000
C1orf57;NTPCR	>tr|Q5TDE9|Q5TDE9_HUMAN Chromosome 1 open reading frame 57, isoform CRA_d OS=Homo sapiens GN=C1orf57 PE=2 SV=1;>tr|Q5TDF0|Q5TDF0_HUMAN Cancer-related nucleoside-triphosphatase OS=Homo sapiens GN=NTPCR PE=1 SV=1;>sp|Q9BSD7|NTPCR_HUMAN Cancer-related nucleos	Cancer-related nucleoside-triphosphatase	20.713	190	NA	NA	1	0.61436	0.97477	4	9.5	28.4	1	4	6728300	13688000	76595000	62943000
RPS15A;hCG_1994130	>tr|I3L3P7|I3L3P7_HUMAN 40S ribosomal protein S15a OS=Homo sapiens GN=RPS15A PE=1 SV=1;>tr|B2R4W8|B2R4W8_HUMAN HCG1994130, isoform CRA_a OS=Homo sapiens GN=hCG_1994130 PE=2 SV=1;>sp|P62244|RS15A_HUMAN 40S ribosomal protein S15a OS=Homo sapiens GN=RPS15A PE	40S ribosomal protein S15a	11.477	100	NA	NA	1	0.62115	0.98756	3	8	26	1	3	13497000	11018000	22672000	34796000
FAM168A	>sp|Q92567-2|F168A_HUMAN Isoform 2 of Protein FAM168A OS=Homo sapiens GN=FAM168A;>sp|Q92567|F168A_HUMAN Protein FAM168A OS=Homo sapiens GN=FAM168A PE=1 SV=2	Protein FAM168A	25.061	235	NA	NA	1	0.65418	0.98814	2	4.3	7.7	1	2	68409000	79343000	111790000	174210000
RBMS1;RBMS2	>tr|E7ETU5|E7ETU5_HUMAN RNA-binding motif, single-stranded-interacting protein 1 OS=Homo sapiens GN=RBMS1 PE=1 SV=1;>tr|F6Y5H0|F6Y5H0_HUMAN RNA-binding motif, single-stranded-interacting protein 1 OS=Homo sapiens GN=RBMS1 PE=1 SV=1;>tr|B4DN88|B4DN88_HUMAN	RNA-binding motif, single-stranded-interacting protein 1;RNA-binding motif, single-stranded-interacting protein 2	40.147	370	NA	NA	0	0.62941	0.99754	2	0	6.8	0	2	0	0	21792000	35312000
WBP4	>tr|B3KMC8|B3KMC8_HUMAN cDNA FLJ10695 fis, clone NT2RP3000403, highly similar to WW domain-binding protein 4 OS=Homo sapiens PE=2 SV=1;>tr|B2RB72|B2RB72_HUMAN cDNA, FLJ95344, highly similar to Homo sapiens WW domain binding protein 4 (formin binding protei	WW domain-binding protein 4	42.503	376	NA	NA	1	0.61974	0.99897	2	2.1	5.1	1	2	7700600	9623700	16263000	20819000
HMGB2	>tr|Q5U071|Q5U071_HUMAN High-mobility group box 2 OS=Homo sapiens PE=2 SV=1;>sp|P26583|HMGB2_HUMAN High mobility group protein B2 OS=Homo sapiens GN=HMGB2 PE=1 SV=2;>tr|D6R9A6|D6R9A6_HUMAN High mobility group protein B2 (Fragment) OS=Homo sapiens GN=HMGB2	High mobility group protein B2	23.904	208	NA	NA	1	0.64265	1.0083	4	12.5	28.8	1	5	15468000	31475000	169290000	237840000
RBM15;RBM15B	>tr|A0A087WWP4|A0A087WWP4_HUMAN Putative RNA-binding protein 15 OS=Homo sapiens GN=RBM15 PE=1 SV=1;>sp|Q96T37-4|RBM15_HUMAN Isoform 4 of Putative RNA-binding protein 15 OS=Homo sapiens GN=RBM15;>sp|Q96T37-2|RBM15_HUMAN Isoform 2 of Putative RNA-binding pro	Putative RNA-binding protein 15;Putative RNA-binding protein 15B	102.13	933	NA	NA	1	0.64933	1.0189	2	1.9	2.7	1	2	12495000	11368000	15369000	22354000
ING1	>tr|A0A087WXF7|A0A087WXF7_HUMAN Inhibitor of growth protein 1 (Fragment) OS=Homo sapiens GN=ING1 PE=1 SV=1;>sp|Q9UK53-3|ING1_HUMAN Isoform 3 of Inhibitor of growth protein 1 OS=Homo sapiens GN=ING1;>sp|Q9UK53-4|ING1_HUMAN Isoform 4 of Inhibitor of growth p	Inhibitor of growth protein 1	12.566	111	NA	NA	0	0.66202	1.0424	2	0	27.9	0	2	0	0	25383000	30163000
C1QBP	>tr|A8K651|A8K651_HUMAN cDNA FLJ75700, highly similar to Homo sapiens complement component 1, q subcomponent binding protein (C1QBP), nuclear gene encoding mitochondrial protein, mRNA OS=Homo sapiens PE=2 SV=1;>sp|Q07021|C1QBP_HUMAN Complement component 1	Complement component 1 Q subcomponent-binding protein, mitochondrial	31.38	282	NA	NA	1	0.59572	1.0635	3	5	16.7	1	3	47441000	37410000	60355000	85930000
STAU2;STAU2 variant protein	>tr|G5EA18|G5EA18_HUMAN Double-stranded RNA-binding protein Staufen homolog 2 OS=Homo sapiens GN=STAU2 PE=1 SV=1;>tr|E5RJN7|E5RJN7_HUMAN Double-stranded RNA-binding protein Staufen homolog 2 (Fragment) OS=Homo sapiens GN=STAU2 PE=1 SV=1;>tr|E7EVI1|E7EVI1_H	Double-stranded RNA-binding protein Staufen homolog 2	31.723	291	NA	NA	0	0.67728	1.0713	2	2.7	11	0	2	0	0	11688000	18265000
hCG_19665;NUP62	>tr|A0A024QZF1|A0A024QZF1_HUMAN HCG19665, isoform CRA_a OS=Homo sapiens GN=hCG_19665 PE=4 SV=1;>sp|P37198|NUP62_HUMAN Nuclear pore glycoprotein p62 OS=Homo sapiens GN=NUP62 PE=1 SV=3	Nuclear pore glycoprotein p62	53.254	522	NA	NA	0	0.67208	1.0858	2	0	4.6	0	2	0	0	21608000	25301000
PWP2	>sp|Q15269|PWP2_HUMAN Periodic tryptophan protein 2 homolog OS=Homo sapiens GN=PWP2 PE=1 SV=2	Periodic tryptophan protein 2 homolog	102.45	919	NA	NA	1	0.66617	1.0872	2	1.4	2.9	1	2	7004400	9162100	23536000	30697000
SMC1A;DKFZp686L19178	>tr|B7Z709|B7Z709_HUMAN cDNA FLJ50250, highly similar to Structural maintenance of chromosome 1-like 1 protein OS=Homo sapiens PE=2 SV=1;>tr|A8K7A6|A8K7A6_HUMAN cDNA FLJ77162, highly similar to Homo sapiens SMC1 structural maintenance of chromosomes 1-like	Structural maintenance of chromosomes protein 1A	59.089	516	NA	NA	1	0.70281	1.092	2	1.6	3.3	1	2	8692100	11141000	9868600	14409000
SEPT7;Nbla02942;DKFZp686F17268	>tr|B4DNE4|B4DNE4_HUMAN cDNA FLJ52574, highly similar to Septin-7 OS=Homo sapiens PE=2 SV=1;>tr|G3V1Q4|G3V1Q4_HUMAN Septin 7, isoform CRA_a OS=Homo sapiens GN=SEPT7 PE=1 SV=1;>tr|A0A023T695|A0A023T695_HUMAN Septin 7 variant 4 OS=Homo sapiens PE=2 SV=1;>tr|	Septin-7	44.644	382	NA	NA	1	0.63674	1.108	4	2.4	18.6	1	5	12360000	17667000	73915000	102240000
RPL23	>tr|C9JD32|C9JD32_HUMAN 60S ribosomal protein L23 (Fragment) OS=Homo sapiens GN=RPL23 PE=1 SV=1;>tr|J3KT29|J3KT29_HUMAN 60S ribosomal protein L23 OS=Homo sapiens GN=RPL23 PE=1 SV=1;>tr|Q9BTQ7|Q9BTQ7_HUMAN Similar to ribosomal protein L23 (Fragment) OS=Homo	60S ribosomal protein L23	9.6694	91	NA	NA	1	0.71571	1.1119	2	30.8	30.8	2	2	27753000	25332000	36367000	49293000
C1orf131	>tr|B4E0F7|B4E0F7_HUMAN cDNA FLJ61512 OS=Homo sapiens PE=2 SV=1;>tr|Q5TBH9|Q5TBH9_HUMAN Chromosome 1 open reading frame 131, isoform CRA_a OS=Homo sapiens GN=C1orf131 PE=1 SV=1;>sp|Q8NDD1-3|CA131_HUMAN Isoform 3 of Uncharacterized protein C1orf131 OS=Homo	Uncharacterized protein C1orf131	26.678	240	NA	NA	1	0.70719	1.1194	2	3.3	7.9	1	2	23374000	13639000	24152000	31149000
RFC3	>tr|B4DKE6|B4DKE6_HUMAN cDNA FLJ60629, highly similar to Replication factor C subunit 3 OS=Homo sapiens PE=2 SV=1;>tr|A0A024RDQ8|A0A024RDQ8_HUMAN Replication factor C (Activator 1) 3, 38kDa, isoform CRA_a OS=Homo sapiens GN=RFC3 PE=4 SV=1;>sp|P40938-2|RFC3	Replication factor C subunit 3	34.832	305	NA	NA	1	0.68245	1.1246	3	4.6	15.1	1	3	9402400	12087000	46212000	68972000
NDUFB10	>tr|H3BPJ9|H3BPJ9_HUMAN NADH dehydrogenase [ubiquinone] 1 beta subcomplex subunit 10 OS=Homo sapiens GN=NDUFB10 PE=1 SV=1;>tr|A8K761|A8K761_HUMAN NADH dehydrogenase (Ubiquinone) 1 beta subcomplex, 10, 22kDa, isoform CRA_b OS=Homo sapiens GN=NDUFB10 PE=2 SV	NADH dehydrogenase [ubiquinone] 1 beta subcomplex subunit 10	19.258	161	NA	NA	1	0.72656	1.1341	3	6.2	21.7	1	3	29748000	16933000	74412000	95463000
BAZ2B	>tr|Q8NC87|Q8NC87_HUMAN cDNA FLJ90414 fis, clone NT2RP3000125, similar to RETINOBLASTOMA BINDING PROTEIN 2 (Fragment) OS=Homo sapiens PE=2 SV=1;>sp|Q9UIF8-4|BAZ2B_HUMAN Isoform 4 of Bromodomain adjacent to zinc finger domain protein 2B OS=Homo sapiens GN=B	Bromodomain adjacent to zinc finger domain protein 2B	88.462	796	NA	NA	1	0.66435	1.136	2	1.8	4	1	3	12592000	8223100	9041400	11011000
EIF3L	>tr|Q7Z5X3|Q7Z5X3_HUMAN EIF3L protein OS=Homo sapiens GN=EIF3L PE=2 SV=2;>tr|Q8N7H0|Q8N7H0_HUMAN cDNA FLJ25591 fis, clone JTH12226 OS=Homo sapiens PE=2 SV=1;>tr|B3KNG0|B3KNG0_HUMAN cDNA FLJ14523 fis, clone NT2RM1000905, highly similar to Eukaryotic transla	Eukaryotic translation initiation factor 3 subunit L	22.277	188	NA	NA	1	0.74501	1.1829	2	6.9	15.4	1	2	13441000	19016000	20646000	16407000
SF3B5	>sp|Q9BWJ5|SF3B5_HUMAN Splicing factor 3B subunit 5 OS=Homo sapiens GN=SF3B5 PE=1 SV=1	Splicing factor 3B subunit 5	10.135	86	NA	NA	0	0.74419	1.1893	3	0	27.9	0	2	0	0	57550000	67281000
ATP5C1	>tr|B4DFE6|B4DFE6_HUMAN cDNA FLJ59861, highly similar to ATP synthase gamma chain, mitochondrial (EC 3.6.3.14) OS=Homo sapiens PE=2 SV=1;>tr|B4DL14|B4DL14_HUMAN ATP synthase subunit gamma OS=Homo sapiens PE=2 SV=1;>tr|Q8TAS0|Q8TAS0_HUMAN ATP synthase subun	ATP synthase subunit gamma;ATP synthase subunit gamma, mitochondrial	15.726	143	NA	NA	0	0.7717	1.2167	2	0	15.4	0	2	0	0	32210000	26000000
CBLL1	>tr|C9J2P9|C9J2P9_HUMAN E3 ubiquitin-protein ligase Hakai (Fragment) OS=Homo sapiens GN=CBLL1 PE=1 SV=3;>tr|B4DDV7|B4DDV7_HUMAN cDNA FLJ57701, highly similar to Homo sapiens Cas-Br-M (murine) ecotropic retroviral transforming sequence-like 1 (CBLL1), mRNA	E3 ubiquitin-protein ligase Hakai	36.398	323	NA	NA	0	0.75743	1.2205	4	0	13	0	3	0	0	58654000	73113000
YTHDF3;DKFZp451J085;YTHDF1	>tr|A0A087X0Q1|A0A087X0Q1_HUMAN YTH domain-containing family protein 3 OS=Homo sapiens GN=YTHDF3 PE=1 SV=1;>sp|Q7Z739|YTHD3_HUMAN YTH domain-containing family protein 3 OS=Homo sapiens GN=YTHDF3 PE=1 SV=1;>tr|A0A087X0C3|A0A087X0C3_HUMAN YTH domain-containi	YTH domain-containing family protein 3;YTH domain-containing family protein 1	63.674	583	NA	NA	1	0.70427	1.2215	2	1.7	3.9	1	2	9476600	7958400	9735400	12385000
RPS14	>sp|P62263|RS14_HUMAN 40S ribosomal protein S14 OS=Homo sapiens GN=RPS14 PE=1 SV=3;>tr|H0YB22|H0YB22_HUMAN 40S ribosomal protein S14 (Fragment) OS=Homo sapiens GN=RPS14 PE=1 SV=1;>tr|E5RH77|E5RH77_HUMAN 40S ribosomal protein S14 OS=Homo sapiens GN=RPS14 PE	40S ribosomal protein S14	16.273	151	NA	NA	0	0.77214	1.2618	3	0	29.1	0	3	0	0	40688000	60813000
PUM1	>tr|H0YDK8|H0YDK8_HUMAN Pumilio homolog 1 (Fragment) OS=Homo sapiens GN=PUM1 PE=1 SV=1;>tr|B3KU37|B3KU37_HUMAN cDNA FLJ39157 fis, clone OCBBF2002083, highly similar to Pumilio homolog 1 OS=Homo sapiens PE=2 SV=1;>tr|E9PR38|E9PR38_HUMAN Pumilio homolog 1 OS	Pumilio homolog 1	95.696	900	NA	NA	1	0.79835	1.2682	2	1.2	2.3	0	1	29473000	32310000	32953000	37041000
SREK1	>tr|B3KRJ9|B3KRJ9_HUMAN cDNA FLJ34439 fis, clone HLUNG2001146, highly similar to Splicing factor, arginine/serine-rich 12 OS=Homo sapiens PE=2 SV=1;>sp|Q8WXA9-2|SREK1_HUMAN Isoform 2 of Splicing regulatory glutamine/lysine-rich protein 1 OS=Homo sapiens GN	Splicing regulatory glutamine/lysine-rich protein 1	58.202	514	NA	NA	1	0.82519	1.2962	2	2.5	7.4	1	3	62215000	67640000	112000000	130810000
RPS20	>sp|P60866|RS20_HUMAN 40S ribosomal protein S20 OS=Homo sapiens GN=RPS20 PE=1 SV=1;>sp|P60866-2|RS20_HUMAN Isoform 2 of 40S ribosomal protein S20 OS=Homo sapiens GN=RPS20;>tr|E5RIP1|E5RIP1_HUMAN 40S ribosomal protein S20 OS=Homo sapiens GN=RPS20 PE=1 SV=1;	40S ribosomal protein S20	13.373	119	NA	NA	1	0.82969	1.3159	3	10.1	19.3	1	2	9917000	15022000	29335000	36476000
PDAP1	>sp|Q13442|HAP28_HUMAN 28 kDa heat- and acid-stable phosphoprotein OS=Homo sapiens GN=PDAP1 PE=1 SV=1	28 kDa heat- and acid-stable phosphoprotein	20.63	181	NA	NA	1	0.85184	1.3505	3	5.5	14.9	1	3	11779000	17687000	36479000	51288000
CSTF3	>tr|B4DFQ5|B4DFQ5_HUMAN cDNA FLJ58134, highly similar to Cleavage stimulation factor 77 kDa subunit OS=Homo sapiens PE=2 SV=1;>tr|B4DMA4|B4DMA4_HUMAN cDNA FLJ58400, highly similar to Cleavage stimulation factor 77 kDa subunit OS=Homo sapiens PE=2 SV=1;>sp|	Cleavage stimulation factor subunit 3	72.184	625	NA	NA	1	0.86369	1.3597	2	2.6	4.5	1	2	17726000	20961000	20541000	23115000
PHF6	>tr|B4E138|B4E138_HUMAN cDNA FLJ50940, highly similar to PHD finger protein 6 OS=Homo sapiens PE=2 SV=1;>tr|Q5JRC6|Q5JRC6_HUMAN PHD finger protein 6 OS=Homo sapiens GN=PHF6 PE=1 SV=1;>sp|Q8IWS0-5|PHF6_HUMAN Isoform 5 of PHD finger protein 6 OS=Homo sapiens	PHD finger protein 6	14.047	123	NA	NA	1	0.86294	1.3646	3	8.9	22	1	3	15383000	13072000	30887000	34517000
CLINT1	>sp|Q14677-2|EPN4_HUMAN Isoform 2 of Clathrin interactor 1 OS=Homo sapiens GN=CLINT1;>sp|Q14677|EPN4_HUMAN Clathrin interactor 1 OS=Homo sapiens GN=CLINT1 PE=1 SV=1;>sp|Q14677-3|EPN4_HUMAN Isoform 3 of Clathrin interactor 1 OS=Homo sapiens GN=CLINT1	Clathrin interactor 1	68.166	625	NA	NA	0	0.86923	1.3975	5	0	6.7	0	4	0	0	81741000	94464000
ANXA11	>tr|Q6ICS0|Q6ICS0_HUMAN Annexin (Fragment) OS=Homo sapiens GN=ANXA11 PE=2 SV=1;>tr|Q5T0G8|Q5T0G8_HUMAN Annexin OS=Homo sapiens GN=ANXA11 PE=2 SV=1;>tr|Q59EP1|Q59EP1_HUMAN Annexin (Fragment) OS=Homo sapiens PE=2 SV=1;>tr|B7Z6L0|B7Z6L0_HUMAN Annexin OS=Homo	Annexin;Annexin A11	54.336	505	NA	NA	0	0.85208	1.3994	3	0	6.7	0	3	0	0	29594000	40685000
METAP1	>sp|P53582|MAP11_HUMAN Methionine aminopeptidase 1 OS=Homo sapiens GN=METAP1 PE=1 SV=2	Methionine aminopeptidase 1	43.215	386	NA	NA	0	0.90083	1.4336	3	0	8	0	3	0	0	44082000	57049000
EIF3S2;EIF3I	>tr|Q5U0F4|Q5U0F4_HUMAN Eukaryotic translation initiation factor 3 subunit I OS=Homo sapiens GN=EIF3S2 PE=2 SV=1;>tr|Q53HU7|Q53HU7_HUMAN Eukaryotic translation initiation factor 3, subunit 2 beta, 36kDa variant (Fragment) OS=Homo sapiens PE=2 SV=1;>sp|Q133	Eukaryotic translation initiation factor 3 subunit I	36.501	325	NA	NA	0	0.90744	1.4349	2	0	10.8	0	3	0	0	17153000	19901000
INO80B-WBP1;INO80B	>tr|B4DJ22|B4DJ22_HUMAN cDNA FLJ52945, highly similar to Zinc finger HIT domain-containing protein 4 OS=Homo sapiens PE=2 SV=1;>tr|J3KQ70|J3KQ70_HUMAN HCG2039827, isoform CRA_e OS=Homo sapiens GN=INO80B-WBP1 PE=4 SV=1;>tr|B4DJ31|B4DJ31_HUMAN cDNA FLJ59544,	INO80 complex subunit B	37.01	341	NA	NA	1	0.90216	1.4583	2	3.5	6.2	1	2	18595000	27755000	30581000	46695000
C19orf53	>sp|Q9UNZ5|L10K_HUMAN Leydig cell tumor 10 kDa protein homolog OS=Homo sapiens GN=C19orf53 PE=1 SV=1	Leydig cell tumor 10 kDa protein homolog	10.576	99	NA	NA	0	0.90247	1.4819	2	0	16.2	0	2	0	0	32564000	30135000
ZC3H15	>tr|B7Z592|B7Z592_HUMAN cDNA FLJ61635, highly similar to Homo sapiens likely ortholog of mouse immediate early response, erythropoietin 4 (LEREPO4), mRNA OS=Homo sapiens PE=2 SV=1;>sp|Q8WU90|ZC3HF_HUMAN Zinc finger CCCH domain-containing protein 15 OS=Homo	Zinc finger CCCH domain-containing protein 15	44.89	392	NA	NA	1	0.94162	1.5908	2	3.6	7.9	1	2	7802600	11493000	36745000	32587000
CKAP4	>tr|B3KVX6|B3KVX6_HUMAN cDNA FLJ41699 fis, clone HCHON2004776, highly similar to Homo sapiens cytoskeleton-associated protein 4 (CKAP4), mRNA OS=Homo sapiens PE=2 SV=1;>tr|Q8TB01|Q8TB01_HUMAN Similar to cytoskeleton-associated protein 4 (Fragment) OS=Homo	Cytoskeleton-associated protein 4	58.15	521	NA	NA	0	1.018	1.6027	3	0	7.9	0	3	0	0	30758000	31004000
PABPC4	>tr|B1ANR0|B1ANR0_HUMAN Poly(A) binding protein, cytoplasmic 4 (Inducible form), isoform CRA_e OS=Homo sapiens GN=PABPC4 PE=1 SV=1;>tr|Q6IQ30|Q6IQ30_HUMAN PABPC4 protein OS=Homo sapiens GN=PABPC4 PE=2 SV=1;>sp|Q13310-2|PABP4_HUMAN Isoform 2 of Polyadenylat	Polyadenylate-binding protein 4	67.97	615	NA	NA	0	0.93819	1.6137	2	9.8	12.7	0	2	0	0	20093000	19724000
BRD9	>sp|Q9H8M2|BRD9_HUMAN Bromodomain-containing protein 9 OS=Homo sapiens GN=BRD9 PE=1 SV=2;>sp|Q9H8M2-3|BRD9_HUMAN Isoform 3 of Bromodomain-containing protein 9 OS=Homo sapiens GN=BRD9;>sp|Q9H8M2-1|BRD9_HUMAN Isoform 5 of Bromodomain-containing protein 9 OS=	Bromodomain-containing protein 9	66.999	597	NA	NA	1	0.73865	1.6519	3	3.4	6	1	3	26081000	37450000	71276000	382610000
CEP170	>tr|B4DL23|B4DL23_HUMAN cDNA FLJ53512, highly similar to Homo sapiens centrosomal protein 170 kDa (CEP170), transcript variant alpha, mRNA (Fragment) OS=Homo sapiens PE=2 SV=1;>sp|Q5SW79|CE170_HUMAN Centrosomal protein of 170 kDa OS=Homo sapiens GN=CEP170	Centrosomal protein of 170 kDa	101.77	911	NA	NA	1	1.0652	1.6522	2	1.4	2.4	1	2	2077500	2009300	14409000	17868000
TOR1AIP1	>tr|J3KN66|J3KN66_HUMAN Torsin-1A-interacting protein 1 OS=Homo sapiens GN=TOR1AIP1 PE=1 SV=1;>sp|Q5JTV8-2|TOIP1_HUMAN Isoform 2 of Torsin-1A-interacting protein 1 OS=Homo sapiens GN=TOR1AIP1;>sp|Q5JTV8-3|TOIP1_HUMAN Isoform 3 of Torsin-1A-interacting prot	Torsin-1A-interacting protein 1	67.821	599	NA	NA	0	1.0605	1.6821	2	0	4	0	2	0	0	26157000	26133000
CRIPT	>sp|Q9P021|CRIPT_HUMAN Cysteine-rich PDZ-binding protein OS=Homo sapiens GN=CRIPT PE=1 SV=1	Cysteine-rich PDZ-binding protein	11.216	101	NA	NA	1	1.1252	1.7429	3	16.8	28.7	1	2	19868000	19933000	97481000	101620000
SRP14	>sp|P37108|SRP14_HUMAN Signal recognition particle 14 kDa protein OS=Homo sapiens GN=SRP14 PE=1 SV=2;>tr|H0YLA2|H0YLA2_HUMAN Signal recognition particle 14 kDa protein OS=Homo sapiens GN=SRP14 PE=1 SV=1	Signal recognition particle 14 kDa protein	14.57	136	NA	NA	1	1.1783	1.866	4	10.3	27.2	1	3	63823000	42461000	138820000	116100000
DKFZp686M05161;DKFZp686A1195;TJP1	>tr|Q68DX9|Q68DX9_HUMAN Putative uncharacterized protein DKFZp686M05161 OS=Homo sapiens GN=DKFZp686M05161 PE=2 SV=1;>tr|A0A087X0K9|A0A087X0K9_HUMAN Tight junction protein ZO-1 OS=Homo sapiens GN=TJP1 PE=1 SV=1;>tr|Q6MZU1|Q6MZU1_HUMAN Putative uncharacteriz	Tight junction protein ZO-1	142.57	1267	NA	NA	1	1.194	1.9164	2	1.5	1.6	1	2	8169000	22170000	33797000	35974000
THOC3	>sp|Q96J01-2|THOC3_HUMAN Isoform 2 of THO complex subunit 3 OS=Homo sapiens GN=THOC3;>sp|Q96J01|THOC3_HUMAN THO complex subunit 3 OS=Homo sapiens GN=THOC3 PE=1 SV=1;>tr|H7C0C5|H7C0C5_HUMAN THO complex subunit 3 (Fragment) OS=Homo sapiens GN=THOC3 PE=1 SV=1	THO complex subunit 3	36.031	327	NA	NA	0	1.2257	1.9443	2	0	5.5	0	2	0	0	34952000	31328000
KIFC1	>tr|B4DMA8|B4DMA8_HUMAN Kinesin-like protein OS=Homo sapiens PE=2 SV=1;>tr|B4E063|B4E063_HUMAN Kinesin-like protein OS=Homo sapiens PE=2 SV=1;>tr|A0A024RCS7|A0A024RCS7_HUMAN Kinesin-like protein OS=Homo sapiens GN=KIFC1 PE=3 SV=1;>sp|Q9BW19|KIFC1_HUMAN Kin	Kinesin-like protein KIFC1	60.512	549	NA	NA	1	1.3091	2.1051	3	2.4	5.8	1	3	17544000	10764000	115070000	34070000
DBN1	>sp|Q16643|DREB_HUMAN Drebrin OS=Homo sapiens GN=DBN1 PE=1 SV=4;>sp|Q16643-2|DREB_HUMAN Isoform 2 of Drebrin OS=Homo sapiens GN=DBN1;>sp|Q16643-3|DREB_HUMAN Isoform 3 of Drebrin OS=Homo sapiens GN=DBN1;>tr|D6R9W4|D6R9W4_HUMAN Drebrin (Fragment) OS=Homo sap	Drebrin	71.428	649	NA	NA	1	1.7002	2.836	2	1.2	5.5	1	2	7192900	11257000	58101000	32691000
TMPO	>tr|H0YJH7|H0YJH7_HUMAN Thymopentin (Fragment) OS=Homo sapiens GN=TMPO PE=1 SV=1		26.866	237	NA	NA	1	2.0725	3.5379	3	51.9	42.6	1	2	10639000	40195000	81975000	39709000
PICALM;SNAP91	>tr|B5BU72|B5BU72_HUMAN Phosphatidylinositol-binding clathrin assembly protein isoform 2 OS=Homo sapiens GN=PICALM PE=2 SV=1;>tr|A0A024R5L7|A0A024R5L7_HUMAN Phosphatidylinositol binding clathrin assembly protein, isoform CRA_c OS=Homo sapiens GN=PICALM PE=	Phosphatidylinositol-binding clathrin assembly protein;Clathrin coat assembly protein AP180	66.393	610	NA	NA	1	2.2331	3.6028	2	2	3.4	1	2	22082000	29192000	63500000	33692000
COPG2	>tr|B3KND4|B3KND4_HUMAN Coatomer subunit gamma OS=Homo sapiens PE=2 SV=1;>tr|Q9H9B7|Q9H9B7_HUMAN Coatomer subunit gamma OS=Homo sapiens PE=2 SV=1;>sp|Q9UBF2|COPG2_HUMAN Coatomer subunit gamma-2 OS=Homo sapiens GN=COPG2 PE=1 SV=1;>tr|Q9NUP3|Q9NUP3_HUMAN cDN	Coatomer subunit gamma;Coatomer subunit gamma-2	75.987	681	NA	NA	1	2.9304	4.6784	2	2.5	3.1	1	2	1005500	8950000	32557000	15338000
